# Supplementary material
Source: PubMed Central journal article supplement (PMC7751259)

## Supplemental Information:

# SuFEx-enabled high-throughput medicinal chemistry

Seiya Kitamura<sup>1#</sup>, Qinheng Zheng<sup>2#</sup>, Jordan L. Woehl<sup>1</sup>, Angelo Solania<sup>1</sup>, Emily Chen<sup>3</sup>, Nicholas Dillon<sup>5,7</sup>, Mitchell V. Hull<sup>3</sup>, Miyako Kotaniguchi<sup>8</sup>, Shinichi Kitamura<sup>8</sup>, Victor Nizet<sup>5,6,7</sup>, K. Barry Sharpless<sup>2\*</sup> and Dennis W. Wolan<sup>1,4\*</sup>

Department of Molecular Medicine<sup>1</sup>, Department of Chemistry<sup>2</sup>, California Institute for Biomedical Research<sup>3</sup>, and Department of Integrative Structural and Computational Biology<sup>4</sup>, The Scripps Research Institute, La Jolla, CA, 92037, USA. Department of Pediatrics<sup>5</sup>, Collaborative to Halt Antibiotic-Resistant Microbes (CHARM)<sup>6</sup>, Skaggs School of Pharmacy and Pharmaceutical Sciences<sup>7</sup>, UC San Diego, La Jolla, CA 92093, USA. Laboratory of Advanced Food Process Engineering, Osaka Prefecture University, 1-2, Gakuen-cho, Nakaku, Sakai, Osaka 599-8570, Japan<sup>8</sup>.

<sup>#</sup>Authors contributed equally.

\*Correspondence: wolan@scripps.edu, sharples@scripps.edu

## Table of contents

|               |                                                                                                                                                                                                                                                                                                                        |
|---------------|------------------------------------------------------------------------------------------------------------------------------------------------------------------------------------------------------------------------------------------------------------------------------------------------------------------------|
| <b>S2-S11</b> | Detailed synthetic methods and compound characterization<br>Methods:<br>Measurement of SpeB inhibition<br>Library construction<br>NanoDSF<br>Neutrophil killing assays<br>X-ray crystallography<br>Analytical LC method to determine the purity of synthetic compounds<br>Analytical method to monitor SuFEx reactions |
|---------------|------------------------------------------------------------------------------------------------------------------------------------------------------------------------------------------------------------------------------------------------------------------------------------------------------------------------|

### Tables

|                |                                                                                                                    |
|----------------|--------------------------------------------------------------------------------------------------------------------|
| <b>S12-S13</b> | <b>Table S1.</b> Preliminary structure-activity relationships of compound <b>1</b> .                               |
| <b>S14</b>     | <b>Table S2.</b> PBS improves the yield of SuFEx reaction.                                                         |
| <b>S15</b>     | <b>Table S3.</b> Scope of SuFEx reactions in the HT library synthesis.                                             |
| <b>S16</b>     | <b>Table S4.</b> Secondary amine library information and their potency in the screening.                           |
| <b>S20</b>     | <b>Table S5.</b> Primary amine library information and their potency in the screening.                             |
| <b>S30</b>     | <b>Table S6.</b> SpeB in complex with compound <b>5</b> x-ray data processing and structure refinement statistics. |
| <b>S31</b>     | <b>Table S7.</b> Structure-activity relationships of selected analogs.                                             |
| <b>S32</b>     | <b>Table S8.</b> Key parameters of selected inhibitors.                                                            |

### Figures

|            |                                                                                                                                                                                         |
|------------|-----------------------------------------------------------------------------------------------------------------------------------------------------------------------------------------|
| <b>S33</b> | <b>Figure S1.</b> Inhibitory potency of amines on SpeB enzyme activity.                                                                                                                 |
| <b>S33</b> | <b>Figure S2.</b> Effects of fluoride ion on SpeB enzyme activity and inhibitor potency.                                                                                                |
| <b>S34</b> | <b>Figure S3.</b> Correlation of pIC <sub>50</sub> estimated by the measurement of inhibitory potency of reaction mixture vs Manual measurement of pIC <sub>50</sub> of pure compounds. |
| <b>S34</b> | <b>Figure S4.</b> Additional correlation of pIC <sub>50</sub> between picomole-scale synthesis vs 96 well plate synthesis.                                                              |
| <b>S35</b> | <b>Figure S5.</b> K <sub>i</sub> determination of compounds <b>5</b> and <b>7</b> against SpeB.                                                                                         |
| <b>S35</b> | <b>Figure S6.</b> Compounds <b>5</b> & <b>7</b> are reversible inhibitors.                                                                                                              |
| <b>S37</b> | <b>Figure S7.</b> Differential scanning fluorimetry melting curves.                                                                                                                     |
| <b>S38</b> | <b>Figure S8.</b> Surface plasmon resonance analysis of cmpd <b>5</b> against rSpeB.                                                                                                    |
| <b>S38</b> | <b>Figure S9.</b> X-ray structure of compound <b>5</b> -SpeB complex.                                                                                                                   |
| <b>S39</b> | <b>Figure S10.</b> Intramolecular CH- $\pi$ interaction between piperidine and benzyl moiety of compound <b>5</b> bound to SpeB.                                                        |
| <b>S40</b> | <b>Supplementary References</b>                                                                                                                                                         |

### Supplementary Data

|                 |                                                 |
|-----------------|-------------------------------------------------|
| <b>S41-S108</b> | NMR spectra, LC-CAD trace of the SuFEx reaction |
|-----------------|-------------------------------------------------|

## Detailed synthetic methods and compound characterization

### General

All reagents and solvents were purchased from commercial suppliers and were used without further purification.  $^1\text{H}$  and  $^{13}\text{C}$  NMR spectra were collected using a Bruker 600, 500, or 400 MHz spectrometer with chemical shifts reported relative to residual deuterated solvent peaks or a tetramethylsilane internal standard.  $\text{CFCl}_3$  was used as an internal standard for  $^{19}\text{F}$ -NMR. Accurate masses were measured using an ESI-TOF (HRMS, Agilent MSD) or MSQ Plus mass spectrometer (LRMS, Thermo Scientific). Reactions were monitored on TLC plates (silica gel 60, F254 coating, EMD Millipore, 1057150001), and spots were either monitored under UV light (254 nm) or stained with phosphomolybdic acid. The same TLC system was used to test purity, and all final products showed a single spot on TLC with both  $\text{KMnO}_4$  and UV absorbance. The purity of the compounds that were tested in the assay was >95% based on  $^1\text{H}$  NMR and reverse phase HPLC-UV on monitoring absorption at 240 nm (detailed in the section 'analytical LC method to determine the purity of synthetic compounds'). It should be noted that SpeB is susceptible to divalent cations such as  $\text{Cu}^{2+}$ ,  $\text{Zn}^{2+}$ ; thus, care was taken to ensure that the final products did not contain contaminations of these metals.

## METHODS

### Synthesis

#### Representative procedure for Cbz synthesis (Method A)

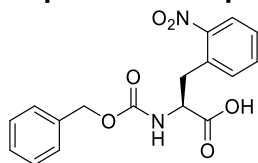

To an ACN/aqueous  $\text{NaHCO}_3$  solution (1:1) of (S)-2-amino-3-(2-nitrophenyl)propanoic acid (1 g, 4.76 mmol) was added N-(Benzyloxycarbonyloxy)succinimide (1.2 g, 4.82 mmol, 1.01 eq.) and stirred overnight. To this solution was added ethyl acetate and 1M HCl, and the aqueous phase was extracted with ethyl acetate. The organic layer was combined, washed with brine, dried over  $\text{MgSO}_4$ , filtered and concentrated in vacuo to give a fairly pure target molecule an off-white solid (1.6 g, quant.). The compound was used into the next step without further purification. ((S)-2-(((benzyloxy)carbonyl)amino)-3-(2-nitrophenyl)propanoic acid).  $^1\text{H}$  NMR (600 MHz,  $\text{DMSO}-d_6$ )  $\delta$  8.03 – 7.92 (m, 1H), 7.68 (d,  $J$  = 8.8 Hz, 1H), 7.63 (td,  $J$  = 7.5, 1.4 Hz, 1H), 7.51 (t,  $J$  = 7.5 Hz, 2H), 7.36 – 7.32 (m, 2H), 7.32 – 7.27 (m, 1H), 7.25 – 7.19 (m, 2H), 4.94 (s, 2H), 4.36 (ddd,  $J$  = 10.7, 8.9, 4.5 Hz, 1H), 3.48 (dd,  $J$  = 13.9, 4.5 Hz, 1H), 3.01 (dd,  $J$  = 14.0, 10.7 Hz, 1H).  $^{13}\text{C}$  NMR (151 MHz,  $\text{DMSO}$ )  $\delta$  172.8, 155.9, 149.2, 137.0, 133.1, 133.0, 132.3, 128.3, 128.2, 127.7, 127.4, 124.6, 65.3, 53.9, 33.7. (+) calcd for  $(\text{M}+\text{H})^+$  345.1. Found 345.2. ( $t_R$  = 10.4 min).

#### Representative procedure for the conversion from carboxylic acid into amide (Method B)

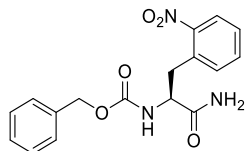

To a dioxane solution of (S)-2-(((benzyloxy)carbonyl)amino)-3-(2-nitrophenyl)propanoic acid (2 g, 5.83 mmol) was added pyridine (484  $\mu\text{L}$ , 475 mg, 6 mmol, 1.02 eq.) followed by Di-*tert*-butyl dicarbonate (2.6 g, 11.9 mmol, 2.0 eq.) and ammonium bicarbonate (1.15 g, 14.6 mmol, 2.5 eq.), and stirred overnight at RT. To this solution was added water, and the precipitate was collected by filtration. Recrystallization from acetone gave fairly pure target molecule as an off-white solid (1.2 g, 3.5 mmol, 60 %).  $^1\text{H}$  NMR (600 MHz,  $\text{DMSO}-d_6$ )  $\delta$  7.96 (dd,  $J$  = 8.4, 1.4 Hz, 1H), 7.62 (td,  $J$  = 7.6, 1.4 Hz, 1H), 7.52 – 7.47 (m, 3H), 7.38 – 7.27 (m, 4H), 7.22 (d,  $J$  = 7.4 Hz, 2H), 7.14 (s, 1H), 4.99 – 4.88 (m, 2H), 4.41 – 4.32 (m, 1H), 3.38 (dt,  $J$  = 14.5, 3.7 Hz, 1H), 3.01 (ddd,  $J$  = 13.9, 10.2, 2.5 Hz, 1H).  $^{13}\text{C}$  NMR (151 MHz,  $\text{DMSO}$ )  $\delta$  172.7, 155.8,

149.3, 137.0, 133.0, 132.6, 132.5, 128.3, 128.0, 127.7, 127.4, 124.5, 65.3, 54.3, 34.2. (+) calcd for (M+H)<sup>+</sup> 344.1. Found 344.2. (*t*<sub>R</sub> = 10.0 min).

### Representative procedure for the conversion of amide into nitrile (Method C)

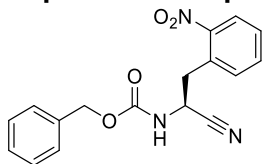

To a DMF solution of benzyl (S)-1-amino-3-(2-nitrophenyl)-1-oxopropan-2-ylcarbamate (1.2 g, 3.5 mmol) was added cyanuric chloride (1.2 g, 6.5 mmol, 1.86 eq.) at 0°C and stirred overnight at RT. To this solution was added ethyl acetate and water, and the aqueous phase was extracted with ethyl acetate. The organic layer was combined, washed with brine, dried over MgSO<sub>4</sub>, filtered and concentrated in vacuo. Recrystallization from acetone gave a pure target molecule as an off-white solid (1.6 g, quant.). <sup>1</sup>H NMR (400 MHz, DMSO-*d*<sub>6</sub>) δ 8.37 (d, *J* = 8.2 Hz, 1H), 8.05 (d, *J* = 8.1 Hz, 1H), 7.76 – 7.68 (m, 1H), 7.62 – 7.50 (m, 2H), 7.41 – 7.22 (m, 5H), 5.04 (s, 2H), 4.94 (dd, *J* = 15.6, 7.9 Hz, 1H), 3.46 (dd, *J* = 13.7, 6.7 Hz, 1H), 3.32 (m (overlap with water signal), 1H). <sup>13</sup>C NMR (101 MHz, DMSO-*d*<sub>6</sub>) δ 155.3, 149.1, 136.4, 133.7, 133.2, 130.0, 129.1, 128.4, 128.0, 127.9, 125.0, 118.8, 66.2, 42.7, 34.8. LRMS (+) calcd for (M+H)<sup>+</sup> 326.1. Found 326.3. Purity (HPLC-UV): >99% (*t*<sub>R</sub> = 11.3 min).

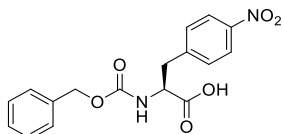

Method A (2 g, quant.). <sup>1</sup>H NMR (600 MHz, Chloroform-*d*) δ 8.12 (d, *J* = 8.2 Hz, 2H), 7.38 – 7.29 (m, 7H), 5.33 – 5.17 (m, 1H), 5.15 – 5.03 (m, 2H), 4.73 (dd, *J* = 13.8, 6.9 Hz, 1H), 3.36 (dd, *J* = 13.9, 5.6 Hz, 1H), 3.17 (dd, *J* = 14.0, 6.7 Hz, 1H). <sup>13</sup>C NMR (151 MHz, CDCl<sub>3</sub>) δ 173.8, 155.6, 147.2, 143.4, 135.8, 130.3, 128.6, 128.5, 128.2, 123.8, 67.4, 54.2, 37.8. LRMS (+) calcd for (M+H)<sup>+</sup> 345.1. Found 345.3. (*t*<sub>R</sub> = 10.6 min).

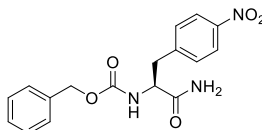

Method B (1.56 g, 4.55 mmol, 78%). <sup>1</sup>H NMR (600 MHz, DMSO-*d*<sub>6</sub>) δ 8.17 – 8.12 (m, 2H), 7.59 – 7.50 (m, 4H), 7.34 – 7.25 (m, 3H), 7.25 – 7.19 (m, 2H), 7.17 – 7.11 (m, 1H), 4.95 (d, *J* = 12.7 Hz, 1H), 4.91 (d, *J* = 12.7 Hz, 1H), 4.26 (ddd, *J* = 10.8, 8.8, 4.2 Hz, 1H), 3.15 (dd, *J* = 13.6, 4.2 Hz, 1H), 2.89 (dd, *J* = 13.6, 10.8 Hz, 1H). <sup>13</sup>C NMR (151 MHz, DMSO) δ 172.8, 155.9, 146.8, 146.2, 137.0, 130.5, 128.2, 127.7, 127.4, 123.2, 65.2, 55.5, 37.4. LRMS (+) calcd for (M+NH<sub>4</sub>)<sup>+</sup> 344.1. Found 344.2. (*t*<sub>R</sub> = 10.0 min).

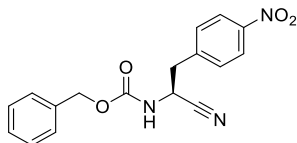

Method C, white solid (81 mg, 0.25 mmol, 5%). <sup>1</sup>H NMR (600 MHz, DMSO-*d*<sub>6</sub>) δ 8.29 (d, *J* = 8.3 Hz, 1H), 8.21 – 8.14 (m, 2H), 7.64 – 7.54 (m, 2H), 7.35 – 7.28 (m, 3H), 7.29 – 7.25 (m, 2H), 5.03 (s, 2H), 4.90 (dd, *J* = 15.6, 8.2 Hz, 1H), 3.30 – 3.24 (m, 1H), 3.22 – 3.18 (m, 1H). <sup>13</sup>C NMR (151 MHz, DMSO) δ 155.3, 149.9, 146.7, 143.6, 136.4, 130.8, 128.3, 128.0, 127.8, 123.4, 119.1, 66.1, 43.1, 40.0. LRMS (+) calcd for (M+NH<sub>4</sub>)<sup>+</sup> 343.1. Found 343.4. Purity (HPLC-UV): >99% (*t*<sub>R</sub> = 11.3 min).

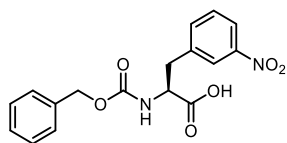

Method A (1.46 g, 4.24 mmol, 92%).  $^1\text{H NMR}$  (600 MHz,  $\text{DMSO-}d_6$ )  $\delta$  8.18–8.16 (m, 1H), 8.12 – 8.08 (m, 1H), 7.78 – 7.74 (m, 2H), 7.58 (t,  $J = 7.9$  Hz, 1H), 7.33 – 7.27 (m, 3H), 7.25 – 7.19 (m, 2H), 4.99 – 4.92 (m, 2H), 4.29 (ddd,  $J = 10.8, 8.6, 4.4$  Hz, 1H), 3.25 (dd,  $J = 13.9, 4.4$  Hz, 1H), 2.98 (dd,  $J = 13.8, 10.8$  Hz, 1H).  $^{13}\text{C NMR}$  (151 MHz,  $\text{DMSO-}d_6$ )  $\delta$  172.9, 156.0, 147.6, 140.3, 137.0, 136.1, 129.7, 128.3, 127.8, 127.4, 124.0, 121.6, 65.3, 55.0, 35.9. LRMS (+) calcd for  $(\text{M}+\text{H})^+$  345.1. Found 345.3. ( $t_R = 10.6$  min).

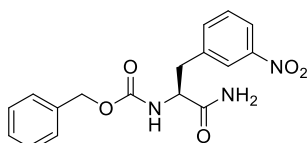

Method B (136 mg, 400  $\mu\text{mol}$ , 40%).  $^1\text{H NMR}$  (600 MHz,  $\text{DMSO-}d_6$ )  $\delta$  8.23 (t,  $J = 2.0$  Hz, 1H), 8.09 (ddd,  $J = 8.2, 2.5, 1.0$  Hz, 1H), 7.75 (dt,  $J = 7.8, 1.3$  Hz, 1H), 7.58 (t,  $J = 7.9$  Hz, 1H), 7.54 – 7.42 (m, 1H), 7.33 – 7.24 (m, 3H), 7.23 – 7.18 (m, 2H), 7.15 – 7.08 (m, 1H), 4.97 – 4.86 (m, 2H), 4.28 – 4.19 (m, 1H), 3.14 (dd,  $J = 13.6, 4.0$  Hz, 1H), 2.88 (dd,  $J = 13.6, 10.9$  Hz, 1H).  $^{13}\text{C NMR}$  (151 MHz,  $\text{DMSO-}d_6$ )  $\delta$  172.9, 155.9, 147.6, 140.7, 137.0, 136.2, 129.5, 128.2, 127.7, 127.3, 123.9, 121.4, 65.2, 55.7, 37.1. LRMS (+) calcd for  $(\text{M}+\text{H})^+$  344.1. Found 344.2. ( $t_R = 10.1$  min).

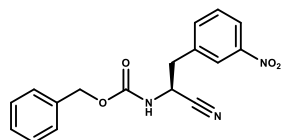

Method C (43 mg, 130  $\mu\text{mol}$ , 40%).  $^1\text{H NMR}$  (600 MHz,  $\text{DMSO-}d_6$ )  $\delta$  8.30 (d,  $J = 8.1$  Hz, 1H), 8.26 (t,  $J = 2.0$  Hz, 1H), 8.14 (ddd,  $J = 8.2, 2.4, 1.0$  Hz, 1H), 7.78 (dt,  $J = 7.7, 1.3$  Hz, 1H), 7.62 (t,  $J = 7.9$  Hz, 1H), 7.38 – 7.29 (m, 3H), 7.28 – 7.23 (m, 2H), 5.02 (s, 2H), 4.96 – 4.84 (m, 1H), 3.34 – 3.24 (m, 2H), 3.25 – 3.11 (m, 1H).  $^{13}\text{C NMR}$  (151 MHz,  $\text{DMSO-}d_6$ )  $\delta$  155.3, 147.7, 137.8, 136.4, 129.8, 128.3, 128.0, 127.7, 124.3, 122.2, 119.2, 66.0, 43.3, 36.7. LRMS (+) calcd for  $(\text{M}+\text{NH}_4)^+$  343.1. Found 343.3. Purity (HPLC-UV): >99% ( $t_R = 11.4$  min).

#### Representative procedure for reduction of nitro moiety to amine using $\text{SnCl}_2$ (Method D)

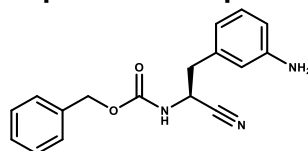

To an ethanol solution of benzyl (S)-(1-cyano-2-(3-nitrophenyl)ethyl)carbamate (400 mg, 1.23 mmol) was added  $\text{SnCl}_2$  (585 mg, 3.1 mmol, 2.5 eq.) and refluxed for 2 hours. Solvent was evaporated in vacuo and to the residue was added ethyl acetate and washed twice with 1N  $\text{NaOH}_{\text{aq}}$ , dried over  $\text{NaSO}_4$ , filtered and concentrated in vacuo. Column chromatography (Hexane: ethyl acetate=2:1) gave a pure target molecule as an off-white solid (170 mg, 0.58 mmol, 47 %).  $^1\text{H NMR}$  (600 MHz,  $\text{DMSO-}d_6$ )  $\delta$  8.24 (d,  $J = 8.0$  Hz, 1H), 7.40 – 7.35 (m, 2H), 7.35 – 7.29 (m, 3H), 6.95 (t,  $J = 7.7$  Hz, 1H), 6.49 – 6.40 (m, 3H), 5.10 – 4.99 (m, 4H), 4.64 (dd,  $J = 16.2, 8.0$  Hz, 1H), 2.90 (d,  $J = 8.1$  Hz, 2H).  $^{13}\text{C NMR}$  (151 MHz,  $\text{DMSO-}d_6$ )  $\delta$  155.3, 148.7, 136.5, 135.9, 128.9, 128.4, 128.0, 127.9, 119.4, 116.5, 114.6, 112.8, 66.1, 44.0, 37.8. LRMS (+) calcd for  $(\text{M}+\text{H})^+$  296.2. Found 296.3. Purity (HPLC-UV): >99% ( $t_R = 9.4$  min).

#### Representative procedure for the conversion of aniline into iminosulfur oxydifluorides (Method E)

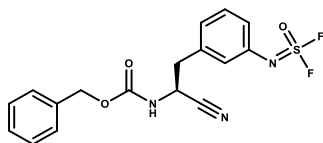

The method for the preparation of iminosulfur oxydifluorides is adapted from Li *et al.*<sup>1</sup> In a 25-mL round bottom flask, benzyl (S)-2-(3-aminophenyl)-1-cyanoethyl carbamate trifluoroacetate salt (135.8 mg, 0.3317 mmol) and triethylamine (139  $\mu$ L, 1.00 mmol, 3.0 equiv) were dissolved in anhydrous acetonitrile (3.3 mL). Sealed with a rubber septum, the flask was evacuated and backfilled with thionyl tetrafluoride gas (~25 mL). Mild exotherm was observed at the start of the reaction in company with fume generation. The reaction was monitored by TLC and found complete in 30 min. Volatiles were removed by a rotary evaporator. The crude was purified by flash column chromatography (hexanes to 30% ethyl acetate in hexanes) to give the target iminosulfur oxydifluoride as a white crystalline (118.2 mg, 0.3116 mmol, 94% yield). <sup>1</sup>H NMR (600 MHz, Chloroform-*d*)  $\delta$  7.41 – 7.30 (m, 6H), 7.14 (d,  $J$  = 7.7 Hz, 1H), 7.10 (ddd,  $J$  = 8.1, 2.2, 1.0 Hz, 1H), 7.03 (s, 1H), 5.15 – 5.08 (m, 3H), 4.92 – 4.85 (m, 1H), 3.14 – 3.04 (m, 2H). <sup>13</sup>C NMR (151 MHz, Chloroform-*d*)  $\delta$  155.0, 136.9 (t,  $J_{CF}$  = 3.0 Hz), 135.8, 135.5, 130.5, 128.8, 128.7, 128.5, 127.3, 124.9 (t,  $J_{CF}$  = 3.0 Hz), 123.3 (t,  $J_{CF}$  = 3.0 Hz), 117.8, 68.0, 43.7, 38.9. <sup>19</sup>F NMR (377 MHz, CDCl<sub>3</sub>)  $\delta$  47.0. LRMS (+) calcd for (M+H)<sup>+</sup> 380.1. Found 380.2. Purity (HPLC-UV): >99% (*t*R = 12.2 min).

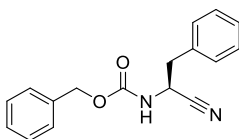

Method C (3.5 g, 12.5 mmol, 89%). <sup>1</sup>H NMR (600 MHz, DMSO-*d*<sub>6</sub>)  $\delta$  8.27 (d,  $J$  = 8.1 Hz, 1H), 7.43 – 7.21 (m, 10H), 5.05 (s, 2H), 4.78–4.74 (m, 1H), 3.15 – 2.97 (m, 2H). <sup>13</sup>C NMR (151 MHz, DMSO-*d*<sub>6</sub>)  $\delta$  155.4, 136.5, 135.5, 129.4, 128.40, 128.39, 128.0, 127.8, 127.1, 119.4, 66.0, 43.8, 37.4. (+) calcd for (M+NH<sub>4</sub>)<sup>+</sup> 298.2. Found 298.3. Purity (HPLC-UV): >99% (*t*R = 11.5 min).

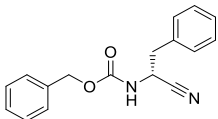

Method C (11 mg, 39  $\mu$ mol, 12 %). <sup>1</sup>H & <sup>13</sup>C NMR was identical to the L-isomer. (+) calcd for (M+NH<sub>4</sub>)<sup>+</sup> 298.2. Found 298.4. Purity (HPLC-UV): >99% (*t*R = 11.5 min).

### Procedure for Cbz deprotection

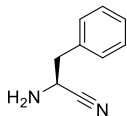

To a dioxane solution of benzyl (S)-1-cyano-2-phenylethyl carbamate (3.5 g, 12.5 mmol) was added 10% Pd/C (1 g) and the reaction flask was purged with hydrogen gas and stirred overnight at RT. The reaction mixture was filtered through celite and concentrated in vacuo. Column chromatography (ethyl acetate 100%) gave a target molecule as a reddish oil and used for the next step without further purification (1.6 g, 11 mmol, 88%). <sup>1</sup>H NMR (600 MHz, DMSO-*d*<sub>6</sub>)  $\delta$  7.35 – 7.23 (m, 7H), 3.95 (dd,  $J$  = 8.5, 6.5 Hz, 1H), 2.95 (dd,  $J$  = 13.4, 6.5 Hz, 1H), 2.88 (dd,  $J$  = 13.5, 8.5 Hz, 1H). <sup>13</sup>C NMR (151 MHz, DMSO-*d*<sub>6</sub>)  $\delta$  136.7, 129.4, 128.3, 126.8, 122.7, 44.9, 41.0. (+) calcd for (M+CH<sub>4</sub>CN)<sup>+</sup> 188.1. Found 188.3.

### Synthesis of (S)-1-benzyl-3-(1-cyano-2-phenylethyl) urea

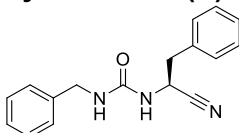

To a THF solution of (S)-2-amino-3-phenylpropanenitrile (146 mg, 1 mmol) was added DIPEA (200  $\mu$ L, 1.2 mmol) and benzyl isocyanate (146 mg, 1.1 mmol, 1.1 eq.) and stirred overnight. Solvent was removed

and ethyl acetate was added to the residue, then washed with 1N HCl<sub>aq</sub> and brine. Column chromatography gave a target molecule as a brown solid (94 mg, 337 μmol, 34%). <sup>1</sup>H NMR (600 MHz, DMSO-*d*<sub>6</sub>) δ 7.37 – 7.25 (m, 7H), 7.25 – 7.17 (m, 3H), 6.75 (d, *J* = 8.3 Hz, 1H), 6.71 (d, *J* = 6.0 Hz, 1H), 4.83 (dd, *J* = 15.6, 7.8 Hz, 1H), 4.20 (d, *J* = 6.0 Hz, 2H), 3.07 (d, *J* = 7.7 Hz, 2H). <sup>13</sup>C NMR (151 MHz, DMSO-*d*<sub>6</sub>) δ 156.7, 140.3, 135.8, 129.4, 128.4, 128.2, 127.1, 127.0, 126.7, 120.1, 42.9, 42.9, 37.8. LRMS (+) calcd for (M+H)<sup>+</sup> 280.1. Found 280.3. Purity (HPLC-UV): >99% (*t*<sub>R</sub> = 10.6 min).

### Representative procedure for the carbamate compound from benzyl alcohol (Method F)

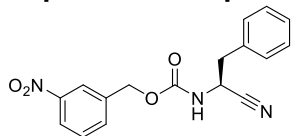

To a dry ACN solution of (3-nitrophenyl)methanol (3.26 g, 21.3 mmol) was added dry DIPEA (5.7 mL, 32.8 mmol, 1.5 eq.) followed by N,N'-Disuccinimidyl carbonate (5.6 g, 21.8 mmol, 1.03 eq.) and stirred overnight at RT. To this solution was added ethyl acetate and water, and the aqueous phase was extracted with ethyl acetate. The organic layer was combined, washed with brine, dried over NaSO<sub>4</sub>, filtered and concentrated in vacuo. Column chromatography (hexane:ethyl acetate=3:1->1:1) gave a fairly pure 2,5-dioxopyrrolidin-1-yl (3-nitrobenzyl) carbonate (1.1 g, 3.7 mmol, 18%). The compound was used for the next step without further purification. <sup>1</sup>H NMR (600 MHz, DMSO-*d*<sub>6</sub>) δ 8.40 (t, *J* = 2.0 Hz, 1H), 8.25 (ddd, *J* = 8.2, 2.4, 1.0 Hz, 1H), 7.97 (ddd, *J* = 7.6, 1.6, 1.0 Hz, 1H), 7.72 (t, *J* = 7.9 Hz, 1H), 5.19 (s, 2H), 2.63 (s, 4H). <sup>13</sup>C NMR (151 MHz, DMSO) δ 171.9, 147.7, 136.7, 135.7, 130.0, 123.7, 123.7, 76.5, 25.4. To a DMF solution of (S)-2-amino-3-phenylpropanenitrile (601 mg, 4.1 mmol, 1.1 eq.) was added DIPEA (3 mL, 17.3 mmol, 4.6 eq.) followed by 2,5-dioxopyrrolidin-1-yl (3-nitrobenzyl) carbonate (1.1 g, 3.7 mmol, 1 eq.) and stirred at RT overnight. To the reaction mixture was added ethyl acetate, then washed with 1N HCl<sub>aq</sub> and brine. Recrystallization from DCM gave a target molecule as a brown solid (1.15 g, 3.5 mmol, 96% from 2,5-dioxopyrrolidin-1-yl (3-nitrobenzyl) carbonate). <sup>1</sup>H NMR (600 MHz, DMSO-*d*<sub>6</sub>) δ 8.40 (d, *J* = 7.8 Hz, 1H), 8.22 – 8.18 (m, 2H), 7.80 – 7.72 (m, 1H), 7.68 (t, *J* = 7.8 Hz, 1H), 7.34 – 7.17 (m, 5H), 5.19 (d, *J* = 2.8 Hz, 2H), 4.77 (dd, *J* = 16.2, 8.0 Hz, 1H), 3.11 – 3.09 (m, 2H). <sup>13</sup>C NMR (151 MHz, DMSO) δ 155.1, 147.8, 138.9, 135.5, 134.2, 130.0, 129.4, 128.4, 127.1, 122.8, 122.1, 119.3, 64.8, 43.8, 37.4. LRMS (+) calcd for (M+NH<sub>4</sub>)<sup>+</sup> 343.1. Found 343.2. Purity (HPLC-UV): 98% (*t*<sub>R</sub> = 11.4 min).

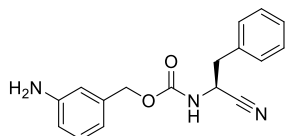

Method D (230 mg, 0.78 mmol, 22%). <sup>1</sup>H NMR (600 MHz, DMSO-*d*<sub>6</sub>) δ 8.21 (d, *J* = 8.0 Hz, 1H), 7.34 – 7.30 (m, 4H), 7.28 – 7.26 (m, 1H), 6.98 (t, *J* = 7.6 Hz, 1H), 6.50 (d, *J* = 7.6 Hz, 2H), 6.43 (d, *J* = 7.4 Hz, 1H), 5.09 (s, 2H), 4.90 (d, *J* = 12.1 Hz, 1H), 4.85 (d, *J* = 12.1 Hz, 1H), 4.73 (dd, *J* = 15.6, 8.0 Hz, 1H), 3.15 – 2.96 (m, 2H). <sup>13</sup>C NMR (151 MHz, DMSO) δ 155.4, 148.7, 136.9, 135.5, 129.4, 128.9, 128.4, 127.1, 119.4, 115.3, 113.6, 113.3, 66.5, 43.9, 37.4. LRMS (+) calcd for (M+H)<sup>+</sup> 296.1. Found 296.3. Purity (HPLC-UV): 96% (*t*<sub>R</sub> = 9.4 min).

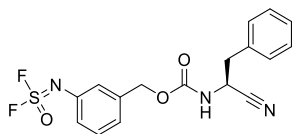

In a 25-mL round bottom flask, 3-aminobenzyl (S)-(1-cyano-2-phenylethyl)carbamate trifluoroacetate salt (180.0 mg, 0.4397 mmol) and triethylamine (183 μL, 1.32 mmol, 3.0 equiv) were dissolved in anhydrous acetonitrile (4.4 mL). Sealed with a rubber septum, the flask was evacuated and backfilled with thionyl tetrafluoride gas (~25 mL). Mild exotherm was observed at the start of the reaction in company with fume generation. The reaction was monitored by TLC and found complete in 30 min. Volatiles were removed by a rotary evaporator. The crude was purified by flash column chromatography (hexanes to 30% ethyl

acetate in hexanes) to give the target iminosulfur oxydifluoride as a white crystalline (136.7 mg, 0.3602 mmol, 82% yield).  $^1\text{H}$  NMR (600 MHz, Acetonitrile- $d_3$ )  $\delta$  7.41 (dd,  $J$  = 8.5, 7.7 Hz, 1H), 7.36 – 7.31 (m, 2H), 7.29 (td,  $J$  = 7.1, 1.2 Hz, 3H), 7.22 (d,  $J$  = 7.5 Hz, 1H), 7.17 – 7.12 (m, 2H), 6.53 (s, 1H), 5.07 (s, 2H), 4.83 – 4.67 (m, 1H), 3.13 (dd,  $J$  = 7.8, 6.3 Hz, 2H).  $^{13}\text{C}$  NMR (151 MHz,  $\text{CD}_3\text{CN}$ )  $\delta$  156.3, 139.9, 137.0 (t,  $J_{\text{CF}}$  = 3.0 Hz), 136.3, 131.1, 130.4, 129.6, 128.5, 126.6, 124.0 (t,  $J_{\text{CF}}$  = 3.0 Hz), 123.7 (t,  $J_{\text{CF}}$  = 3.0 Hz), 119.7, 66.8, 45.1, 38.9.  $^{19}\text{F}$  NMR (376 MHz,  $\text{CD}_3\text{CN}$ )  $\delta$  45.4. LRMS (+) calcd for  $(\text{M}+\text{H})^+$  380.1. Found 380.2. Purity (HPLC-UV): 99% ( $t_{\text{R}}$  = 12.2 min).

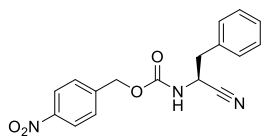

Method F (41 mg, 126  $\mu\text{mol}$ , 16 %).  $^1\text{H}$  NMR (600 MHz,  $\text{DMSO}-d_6$ )  $\delta$  8.43 (s, 1H), 8.23 (d,  $J$  = 8.7 Hz, 2H), 7.57 – 7.51 (m, 2H), 7.32 (d,  $J$  = 6.3 Hz, 4H), 7.27 (tt,  $J$  = 7.1, 2.3 Hz, 1H), 5.20 (s, 2H), 4.82 – 4.72 (m, 1H), 3.10 (dd,  $J$  = 11.7, 8.0 Hz, 2H).  $^{13}\text{C}$  NMR (151 MHz,  $\text{DMSO}-d_6$ )  $\delta$  155.0, 146.9, 144.3, 135.4, 129.3, 128.3, 128.1, 127.0, 123.5, 119.2, 64.7, 43.7, 37.3. (+) calcd for  $(\text{M}+\text{NH}_4)^+$  343.1. Found 343.2. Purity (HPLC-UV): >99% ( $t_{\text{R}}$  = 11.4 min).

### Representative procedure for the isofluor and amine reaction (Method G)

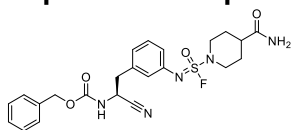

To an ACN solution of benzyl ((1S)-2-(3-((4-(4-carbamoylpiperidin-1-yl)fluoro(oxo)- $\lambda^6$ -sulfaneylidene)amino)phenyl)-1-cyanoethyl) carbamate (10 mg, 26  $\mu\text{mol}$ ) was added 4-Piperidinecarboxamide (13 mg, 101  $\mu\text{mol}$ , 5 eq.) in PBS and stirred overnight at 37°C. This solution was filtered through 0.22  $\mu\text{m}$  filter and purified on preparative HPLC to give a pure benzyl ((1S)-2-(3-((4-carbamoylpiperidin-1-yl)fluoro(oxo)- $\lambda^6$ -sulfaneylidene)amino)phenyl)-1-cyanoethyl) carbamate (compound **5**, 6.5 mg, 13  $\mu\text{mol}$ , 50%).  $^1\text{H}$  NMR (600 MHz,  $\text{DMSO}-d_6$ )  $\delta$  8.25 (d,  $J$  = 8.1 Hz, 1H), 7.36 – 7.28 (m, 6H), 7.25 (t,  $J$  = 7.7 Hz, 1H), 7.05 – 7.00 (m, 2H), 6.97 (ddd,  $J$  = 7.9, 2.2, 1.0 Hz, 1H), 6.91 – 6.86 (m, 1H), 5.04 (d,  $J$  = 2.5 Hz, 2H), 4.74 (q,  $J$  = 7.5 Hz, 1H), 3.99 (d,  $J$  = 12.8 Hz, 1H), 3.95 – 3.88 (m, 1H), 3.18 – 3.10 (m, 2H), 3.08 – 3.00 (m, 2H), 2.39 – 2.30 (m, 1H), 1.90 – 1.81 (m, 2H), 1.64 (ddt,  $J$  = 11.4, 3.9, 1.8 Hz, 2H).  $^{13}\text{C}$  NMR (151 MHz,  $\text{DMSO}-d_6$ )  $\delta$  175.2, 155.2, 139.8, 136.9, 136.4, 129.3, 128.3, 127.9, 127.7, 124.6, 124.1, 121.5, 119.2, 65.9, 46.8, 46.1, 43.6, 37.0, 27.24, 27.19.  $^{19}\text{F}$  NMR (376 MHz,  $\text{DMSO}-d_6$ )  $\delta$  52.75. (+) calcd for  $(\text{M}+\text{Na})^+$  510.1582. Found 510.1593. Purity (HPLC-UV): >99% ( $t_{\text{R}}$  = 10.6 min).

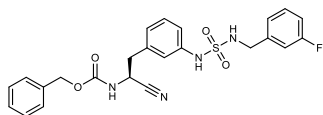

Method G (compound **6**, 5.3 mg, 11  $\mu\text{mol}$ , 42%).  $^1\text{H}$  NMR (600 MHz,  $\text{DMSO}-d_6$ )  $\delta$  9.80 (s, 1H), 8.28 (d,  $J$  = 8.0 Hz, 1H), 8.05 (t,  $J$  = 6.3 Hz, 1H), 7.41 – 7.34 (m, 2H), 7.34 – 7.25 (m, 4H), 7.21 (t,  $J$  = 7.8 Hz, 1H), 7.09 (t,  $J$  = 1.9 Hz, 1H), 7.07 – 6.98 (m, 4H), 6.96 (dt,  $J$  = 7.8, 1.3 Hz, 1H), 5.05 (d,  $J$  = 5.2 Hz, 2H), 4.73 (q,  $J$  = 8.0 Hz, 1H), 4.02 (d,  $J$  = 6.3 Hz, 2H), 3.02 (d,  $J$  = 8.0 Hz, 2H).  $^{13}\text{C}$  NMR (151 MHz,  $\text{DMSO}$ )  $\delta$  162.0 (d,  $J_{\text{CF}}$  = -243 Hz), 155.4, 141.0 (d,  $J_{\text{CF}}$  = 7.2 Hz), 138.9, 136.4, 136.3, 130.0 (d,  $J_{\text{CF}}$  = 8.2 Hz), 129.0, 128.4, 128.0, 127.9, 123.44 (d,  $J_{\text{CF}}$  = 2.7 Hz), 123.39, 119.3, 118.9, 117.1, 114.1 (d,  $J_{\text{CF}}$  = 21.9 Hz), 113.7 (d,  $J_{\text{CF}}$  = 20.8 Hz), 66.1, 45.1, 45.0, 43.9, 37.5.  $^{19}\text{F}$  NMR (376 MHz,  $\text{DMSO}-d_6$ )  $\delta$  -113.38. (+) calcd for  $(\text{M}+\text{H})^+$  483.1. Found 483.2. Purity (HPLC-UV): >99% ( $t_{\text{R}}$  = 11.4 min).

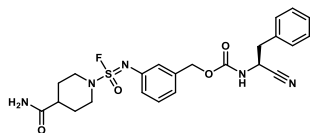

Method G (10 mg, 20  $\mu$ mol, 79%). (+) calcd for (M+H)<sup>+</sup> 488.2. Found 488.3. Purity (HPLC-UV): 99% (*t*<sub>R</sub> = 10.7 min). <sup>1</sup>H NMR (600 MHz, DMSO-*d*<sub>6</sub>)  $\delta$  8.28 (d, *J* = 8.0 Hz, 1H), 7.36 (s, 1H), 7.34 – 7.27 (m, 5H), 7.29 – 7.23 (m, 1H), 7.04 – 6.99 (m, 3H), 6.90 (s, 1H), 5.05 – 4.98 (m, 2H), 4.74 (q, *J* = 8.0 Hz, 1H), 4.03 – 3.97 (m, 1H), 4.00 – 3.90 (m, 1H), 3.16 (q, *J* = 12.2 Hz, 2H), 3.12 – 3.03 (m, 2H), 2.38 – 2.33 (m, 1H), 1.90 – 1.84 (m, 2H), 1.69 – 1.59 (m, 2H). <sup>13</sup>C NMR (151 MHz, DMSO)  $\delta$  175.3, 155.3, 140.0, 137.9, 135.5, 129.5, 129.4, 128.4, 127.1, 123.0, 122.5, 122.4, 119.3, 65.7, 46.9, 46.2, 43.9, 37.3, 27.3. <sup>19</sup>F NMR (376 MHz, DMSO)  $\delta$  52.68. LRMS (+) calcd for (M+H)<sup>+</sup> 488.2. Found 488.4. Purity (HPLC-UV): 99% (*t*<sub>R</sub> = 10.7 min).

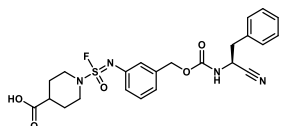

Method G (compound 7, 6.8 mg, 14  $\mu$ mol, 54%). <sup>1</sup>H NMR (600 MHz, DMSO-*d*<sub>6</sub>)  $\delta$  12.46 (s, 1H), 8.29 (d, *J* = 8.0 Hz, 1H), 7.34 – 7.27 (m, 5H), 7.29 – 7.23 (m, 1H), 7.04 – 6.98 (m, 3H), 5.06 – 4.97 (m, 2H), 4.74 (q, *J* = 8.0 Hz, 1H), 3.97 – 3.91 (m, 1H), 3.89 – 3.84 (m, 1H), 3.27 – 3.20 (m, 2H), 3.12 – 3.03 (m, 2H), 2.57 – 2.50 (m, 1H, partially overlap with DMSO signal), 2.02 – 1.95 (m, 2H), 1.70 – 1.61 (m, 2H). <sup>13</sup>C NMR (151 MHz, DMSO-*d*<sub>6</sub>)  $\delta$  174.9, 155.2, 139.9, 137.8, 135.4, 129.4, 129.3, 128.3, 127.0, 122.9, 122.4, 122.3, 119.2, 65.5, 46.6, 46.0, 43.8, 37.2, 26.8. <sup>19</sup>F NMR (376 MHz, DMSO-*d*<sub>6</sub>)  $\delta$  52.55. (+) calcd for (M+H)<sup>+</sup> 489.1602. Found 489.1607. Purity (HPLC-UV): >99% (*t*<sub>R</sub> = 11.5 min).

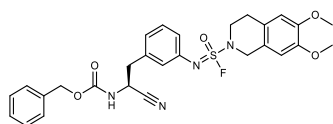

Method G (13.5 mg, 24  $\mu$ mol, 94%). <sup>1</sup>H NMR (600 MHz, DMSO-*d*<sub>6</sub>)  $\delta$  8.26 (d, *J* = 8.1 Hz, 1H), 7.37 – 7.34 (m, 2H), 7.33 – 7.29 (m, 2H), 7.32 – 7.24 (m, 2H), 7.07 – 7.03 (m, 2H), 7.02 – 6.98 (m, 1H), 6.86 (s, 1H), 6.79 (s, 1H), 5.04 (s, 2H), 4.75 (dd, *J* = 16.2, 8.0 Hz, 1H), 4.71 – 4.61 (m, 2H), 3.85 – 3.75 (m, 2H), 3.73 (s, 3H), 3.72 (s, 3H), 3.10 – 3.01 (m, 2H), 2.88 (t, *J* = 6.0 Hz, 2H). <sup>13</sup>C NMR (151 MHz, DMSO-*d*<sub>6</sub>)  $\delta$  155.3, 147.7, 147.4, 139.8, 136.3, 129.3, 128.3, 127.9, 127.7, 124.7, 124.5, 124.2, 122.5, 121.6, 119.2, 111.8, 109.5, 65.9, 55.43, 55.39, 47.7, 44.8, 43.6, 37.0, 26.8. (+) calcd for (M+H)<sup>+</sup> 553.2. Found 553.3. Purity (HPLC-UV): >99% (*t*<sub>R</sub> = 12.4 min).

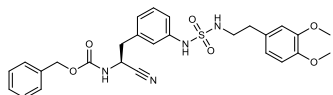

Method G (12.5 mg, 23  $\mu$ mol, 88%). <sup>1</sup>H NMR (600 MHz, DMSO-*d*<sub>6</sub>)  $\delta$  9.73 (s, 1H), 8.26 (d, *J* = 8.0 Hz, 1H), 7.54 (t, *J* = 5.8 Hz, 1H), 7.41 – 7.27 (m, 5H), 7.21 (t, *J* = 7.8 Hz, 1H), 7.10 (t, *J* = 1.9 Hz, 1H), 7.04 (ddd, *J* = 8.1, 2.3, 1.0 Hz, 1H), 6.94 (dt, *J* = 7.7, 1.3 Hz, 1H), 6.80 (d, *J* = 8.2 Hz, 1H), 6.70 (d, *J* = 2.0 Hz, 1H), 6.61 (dd, *J* = 8.2, 2.0 Hz, 1H), 5.03 (q, *J* = 12.3 Hz, 2H), 4.74 (dd, *J* = 15.6, 8.0 Hz, 1H), 3.69 (s, 6H), 3.07 – 2.93 (m, 4H), 2.58 (dd, *J* = 8.8, 6.6 Hz, 2H). <sup>13</sup>C NMR (151 MHz, DMSO-*d*<sub>6</sub>)  $\delta$  155.3, 148.6, 147.2, 139.1, 136.4, 136.3, 131.3, 129.0, 128.4, 128.0, 127.8, 123.2, 120.4, 119.3, 118.5, 116.8, 112.4, 111.8, 66.1, 55.5, 55.4, 43.84, 43.81, 37.5, 34.6. (+) calcd for (M+H)<sup>+</sup> 539.2. Found 539.4. Purity (HPLC-UV): >99% (*t*<sub>R</sub> = 11.1 min).

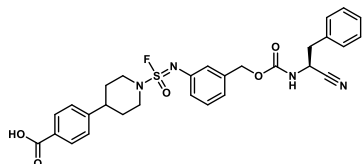

Method G (11.3 mg, 20  $\mu$ mol, 77%). <sup>1</sup>H NMR (600 MHz, DMSO-*d*<sub>6</sub>)  $\delta$  8.29 (d, *J* = 8.0 Hz, 1H), 7.92 – 7.88 (m, 2H), 7.44 – 7.39 (m, 2H), 7.35 – 7.28 (m, 5H), 7.26 (ddd, *J* = 6.3, 5.3, 2.5 Hz, 1H), 7.07 – 7.01 (m, 3H), 5.07 – 4.98 (m, 2H), 4.74 (dd, *J* = 15.6, 8.0 Hz, 1H), 4.19 – 4.12 (m, 1H), 4.10 – 4.03 (m, 1H), 3.29 – 3.20 (overlap with HDO signal, m, 2H), 3.08 (dd, *J* = 7.9, 3.7 Hz, 2H), 2.90 (s, 1H), 1.95 (dd, *J* =



11.3, 2.5 Hz, 2H), 1.85 – 1.73 (m, 2H).  $^{13}\text{C}$  NMR (151 MHz, DMSO)  $\delta$  167.2, 155.3, 150.0, 140.0, 138.0, 135.5, 129.6, 129.5, 129.4, 129.0, 128.4, 127.1, 127.0, 123.0, 122.5, 122.4, 119.3, 65.7, 48.0, 47.0, 43.9, 37.4, 31.4, 31.3.  $^{19}\text{F}$  NMR (377 MHz, DMSO- $d_6$ )  $\delta$  52.31. (+) calcd for (M+H) $^+$  565.2. Found 565.4. Purity (HPLC-UV): 98% ( $t_R$  = 11.9 min).

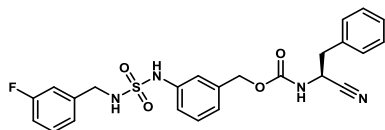

Method G (12 mg, 25  $\mu\text{mol}$ , 96%).  $^1\text{H}$  NMR (600 MHz, DMSO- $d_6$ )  $\delta$  9.84 (s, 1H), 8.27 (d,  $J$  = 8.0 Hz, 1H), 8.07 (t,  $J$  = 6.3 Hz, 1H), 7.35 – 7.23 (m, 7H), 7.12 – 7.09 (m, 2H), 7.08 – 6.98 (m, 3H), 6.94 (dt,  $J$  = 7.7, 1.2 Hz, 1H), 4.99 (d,  $J$  = 12.0 Hz, 1H), 4.96 (d,  $J$  = 12.0 Hz, 1H), 4.74 (dd,  $J$  = 16.2, 8.0 Hz, 1H), 4.05 (d,  $J$  = 6.3 Hz, 2H), 3.07 (dd,  $J$  = 8.0, 4.3 Hz, 2H).  $^{13}\text{C}$  NMR (151 MHz, DMSO)  $\delta$  162.0 (d,  $J_{\text{CF}}$  = -243 Hz), 155.3, 141.0 (d,  $J_{\text{CF}}$  = 7.6 Hz), 138.8, 137.2, 135.5, 130.0 (d,  $J_{\text{CF}}$  = 8.3 Hz), 129.4, 129.0, 128.4, 127.2, 123.5 (d,  $J_{\text{CF}}$  = 2.7 Hz), 121.9, 119.3, 117.8, 117.7, 114.1 (d,  $J_{\text{CF}}$  = 21.3 Hz), 113.7 (d,  $J_{\text{CF}}$  = 21.0 Hz), 66.0, 45.0, 43.9, 37.4.  $^{19}\text{F}$  NMR (376 MHz, DMSO- $d_6$ )  $\delta$  -113.39. (+) calcd for (M+H) $^+$  483.1497. Found 483.1505. Purity (HPLC-UV): >99% ( $t_R$  = 11.4 min).

### Methods for measurement of SpeB and papain inhibition

Recombinant SpeB was expressed in *E. coli* as described previously<sup>2, 3</sup>. The inhibitory potency against SpeB and papain were measured as described previously using Ac-AIK-AMC as a substrate<sup>2, 3</sup>.

### Methods for library construction

In 96 well plate, to a DMSO solution of isodifluor (20  $\mu\text{L}$ , 200  $\mu\text{M}$ , final conc. 50  $\mu\text{M}$ ) was added amine library in DMSO (20  $\mu\text{L}$ , 1 mM, final conc. 250  $\mu\text{M}$ ) and PBS buffer (pH 7.4, 40  $\mu\text{L}$ ) and the reaction was shaken at 37  $^\circ\text{C}$  overnight. The library solution was diluted 50-fold into the buffer (1 %DMSO final concentration) and a 2-fold serial dilution was prepared for the measurement of  $\text{IC}_{50}$ . For the 1536-well plate format, 1  $\mu\text{L}$  of PBS (pH 7.4) was added followed by difluoride solution in DMSO (1  $\mu\text{L}$ , 400  $\mu\text{M}$ , final concentration for the reaction: 200  $\mu\text{M}$ ). The amine library in DMSO was subsequently dispensed using Echo 555 Liquid Handler (100 nL, 20 mM, final concentration for the reaction: 1 mM). The plate was centrifuged, sealed, and incubated at 37  $^\circ\text{C}$  with a humidifier overnight. Inhibitory potency was measured in a similar manner as the 96-well format, with the total volume of 6  $\mu\text{L}$ . Both for 96 well format and 1536 well format, amine library alone in PBS+DMSO (without difluoride) was tested and showed that the amines did not interfere with the assay or SpeB activity at the condition used (Supplementary Fig. 1).

### NanoDSF

Effects of molecules on thermal stability of protein was measured by differential scanning fluorimetry (DSF) using the Prometheus NT.48 instrument (NanoTemper Technologies). Recombinant SpeB protein in assay buffer ( $[\text{SpeB}]_{\text{final}} = 0.25 \text{ mg/mL} \sim 16 \mu\text{M}$ ) with different concentrations of molecule (DMSO 2% final conc.) was loaded onto nano-DSF grade standard capillaries. Thermal unfolding of the protein was analyzed in a thermal ramp from 20 to 95  $^\circ\text{C}$  with a heating rate of 1  $^\circ\text{C}/\text{min}$ .  $\text{EC}_{50}$  values were determined by isothermal analysis as described previously<sup>4</sup>.

### Neutrophil killing assays

Group A Streptococcus (GAS)(*Streptococcus pyogenes*) strain GAS 5448 or a *SpeB* deletion mutant of the 5448 strain<sup>5</sup> was cultured in Todd-Hewitt broth (Neogen 7161D) medium for both a prior overnight and same day mid-logarithmic culture. The latter was used to inoculate 400  $\mu\text{L}$  of the incubation media which contained 198  $\mu\text{L}$  of Rosewell-Park Memorial Institute (Gibco 11835-030) medium amended with 10% Lauria-Broth (Criterion C6323), 20% (100  $\mu\text{L}$ ) fresh human serum, 12.5% (50  $\mu\text{L}$ ) bacterial cell culture supernatant from the mid-logarithmic cultures, and 2  $\mu\text{L}$  DMSO (vehicle control), 1  $\mu\text{L}$  DMSO with 1  $\mu\text{L}$  of 10mM compound **7** (20  $\mu\text{M}$  final conc.), or 2  $\mu\text{L}$  of 10 mM compound **7** (40  $\mu\text{M}$  final conc.) at  $2 \times 10^6$  colony forming units (CFU) ( $\sim \text{OD}_{600} = 0.008$ ) via the addition of 50  $\mu\text{L}$  of a working bacterial culture. The culture was then incubated for 30 min at 37  $^\circ\text{C}$  with 5%  $\text{CO}_2$ . After the 30 min incubation 10  $\mu\text{L}$  of

culture were removed for CFU enumeration. The remaining culture had 100  $\mu$ L of freshly isolated human neutrophils, prepared as previously described<sup>6</sup>, added at a multiplicity of infection (MOI) of 1 ( $\sim 2 \times 10^6$ ), and were incubated an additional 30 min at 37 °C with 5% CO<sub>2</sub>. Cultures were then serially diluted in molecular biology grade water (Corning 46-000-C1) to lyse the neutrophils and spot plated onto Lauria-Agar and incubated at 37 °C overnight for enumeration of CFU.

### Crystallization and x-ray data collection

SpeB-inhibitor complex was crystallized as described previously<sup>2</sup>. Briefly, compound **5** was added in 2-fold molar excess to SpeB (10 mg/mL) and incubated for 30 min at 25 °C prior to crystallization experiments. Crystals were grown by sitting drop-vapor diffusion by mixing equal volumes (2  $\mu$ L) of the complex and reservoir solution consisting of 0.1–0.15 M Na Nitrate, 22–27% PEG 3350. X-ray data was collected on a single, flash-cooled crystal at 100 K to 2.02 Å on beamline 12.2 at the Stanford Synchrotron Radiation Lightsource (SSRL) (Menlo Park, CA) in a cryoprotectant consisting of mother liquor and 20% glycerol. Data was processed with HKL2000<sup>7</sup> in monoclinic space group P2<sub>1</sub> (Supplementary Table 6).

### Structure solution and refinement

All structure solutions were determined by MR with Phaser<sup>8</sup> using the previously published structure of SpeB (PDB ID: 4RKX) as the initial search model. All structures were manually built with Cool<sup>9</sup> and iteratively refined using Phenix<sup>10</sup> with cycles of conventional positional refinement with isotropic B-factor refinement. TLS B-factor refinement was carried out in the last round of refinement. Water molecules were automatically positioned by Phenix using a 2.5 $\sigma$  cutoff in  $f_o-f_c$  maps and manually inspected. The naïve electron density maps clearly identified that compound **5** was covalently attached to SpeB Cys192 (Supplementary Fig. 5). The final R<sub>cryst</sub> and R<sub>free</sub> values are 21.4% and 25.7%. The SpeB:**5** co-complex was analyzed and validated with the PDB Validation Server prior to PDB deposition. Analysis of backbone dihedral angles indicated that all residues are located in the most favorable and additionally allowed regions in the Ramachandran plot. Coordinates and structure factors have been deposited in the Protein Data Bank, [www.wwpdb.org](http://www.wwpdb.org) with accession entry 6UQD. Structure refinement statistics are shown in Supplementary Table 6.

### Analytical LC method to determine the purity of synthetic compounds

Purity determination of synthetic compounds was performed on a Thermo Scientific Accela HPLC system using Accela 1250 pump as described previously<sup>11</sup>. The UV absorption between 190 nm and 400 nm was monitored, and the purity was determined by the peak area at 240 nm. The HPLC gradient method consisted of an aqueous phase (Milli-Q water with 0.1% formic acid) and an organic phase (acetonitrile with 0.1% formic acid) with a 0.5 mL/min flow. The first step consisted of 90% aqueous and 10% organic phases for 1 min, followed by a 15-min gradient to 100% organic phase. A subsequent 3-min step of 100% organic phase was followed by a 3-min gradient to 90% aqueous and 10% organic phases.

### Analytical method to monitor SuFEx reactions

An UltiMate 3000 series HPLC system equipped with quaternary pumps, an online degasser, a corona charged aerosol detector (CAD, Thermo Fisher Scientific K.K., Yokohama, Japan), and an LTQ XL linear ion trap mass spectrometer (Thermo Fisher Scientific, Inc., Waltham, MA, USA) was used for the RP-HPLC/CAD/MS to monitor reactions for library construction. Mobile phase A was Milli-Q water with 0.1% formic acid and B was acetonitrile: water =90:10 with 0.1% formic acid. The solvent gradient program was as follows: 0–10 min A/B (v/v %) 70/30 to 10/90; 10–12 min A/B (v/v %) 10/90. Flow rate was 1.2 mL/min. Molecules were separated with Accucore C18 RP HPLC column (150 mm, 4.6 mm, particle size 2.6  $\mu$ m, Thermo Scientific) at 45 °C. The CAD was used with an acquisition range of 500 pA, and an N<sub>2</sub> gas pressure of 241.3 kPa. ESI-MS was used with positive ion mode; N<sub>2</sub> sheath gas flow rate: 5 units; capillary temperature: 250 °C; source voltage: 5 kV; capillary voltage: 30 V; tube lens voltage: 80 V. The data-dependent mode was set up with two scan events: one to collect the full mass spectrum of all the ions in the sample (MS range  $m/z$ : 300–2000), and the other to collect the tandem MS (MS<sup>2</sup>) spectra of the most intense ions at each time point from the MS spectrum in the scan event. The dynamic exclusion setting was as follows: the repeat count for each ion was set to three, with a report duration of 10 s, an

exclusion list size of 30, and exclusion duration of 30 s. The collision-induced dissociation was conducted with an isolation width of 4 Da and normalized collision energy of 35.

**Table S1.** Preliminary structure-activity relationships of compound 1.

| #                          | R                                                                                   | IC <sub>50</sub> <sup>a</sup><br>(μM) |
|----------------------------|-------------------------------------------------------------------------------------|---------------------------------------|
| Compound 1                 | 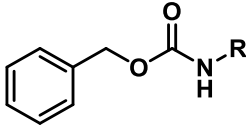   | 14                                    |
| Z-GLYCINE amide            |    | >400                                  |
| Sk061-47-A                 |    | >400                                  |
| Wang 2                     | H                                                                                   | >400                                  |
| Wang 6                     |    | >400                                  |
| sk061-81 L (=S)            |    | 1.8                                   |
| Sk061-85D (=R)             |   | >100                                  |
| sk099-3o                   |  | 0.38                                  |
| sk064-21-2 NO <sub>2</sub> |  | 0.19                                  |
| sk099-3p                   |  | 4.0                                   |

<sup>a</sup>IC<sub>50</sub> values were determined using a fluorescence assay against SpeB. <sup>b</sup>[rSpeB] = 20 nM. Reported IC<sub>50</sub> values are the average of triplicates with at least two datum points above and at least two below the IC<sub>50</sub>. The fluorescent-based assay as performed here has a standard error between 10% and 20%, suggesting that differences of two-fold or greater are significant.

**Table S1.** Continued. Preliminary structure-activity relationships of compound **1**.

| #             |                                                                                     | IC <sub>50</sub> <sup>a</sup><br>( $\mu$ M) |
|---------------|-------------------------------------------------------------------------------------|---------------------------------------------|
| sk061-120-1   | 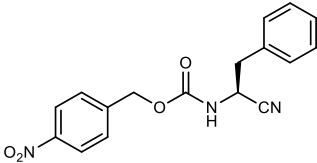   | 8.1                                         |
| Sk064-91      |    | 2.7                                         |
| Sk064-46      |    | ~79                                         |
| sk064-93      |    | 1.6                                         |
| Sk064-88      |  | 0.91                                        |
| Sk064-96-1875 |  | 2.7                                         |
| Sk064-96-1866 |  | 1.6                                         |

<sup>a</sup>IC<sub>50</sub> values were determined using a fluorescence assay against SpeB. Mean  $\pm$  SD values from at least two independent experiments performed in duplicate are shown. <sup>b</sup>[rSpeB] = 20 nM. Reported IC<sub>50</sub> values are the average of triplicates with at least two datum points above and at least two below the IC<sub>50</sub>. The fluorescent-based assay as performed here has a standard error between 10% and 20%, suggesting that differences of two-fold or greater are significant.

**Table S2.** PBS improves the yield of SuFEx reaction.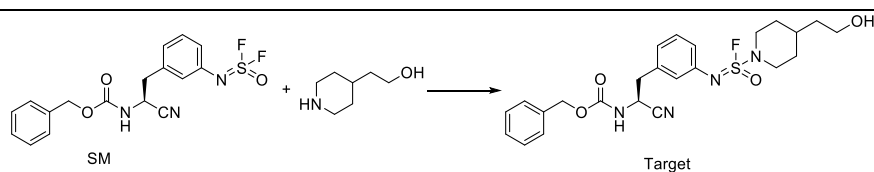

| Entry# | Solvent | Base/buffer | Temp | Time | Target | SM  |
|--------|---------|-------------|------|------|--------|-----|
| 1      | DMSO    | DIPEA 5 eq. | RT   | 12 h | 41%    | 59% |
| 2      | ACN     | DIPEA 5 eq. | RT   | 12 h | 32%    | 68% |
| 3      | DMSO    | PBS pH7.4   | 37°C | 12 h | 100%   | 0%  |

Conversion and starting material (SM) % were determined by LC-UV-MS detecting at wavelength at 254 nm (chromatogram below). 1 mM starting material with 5 mM amine was reacted in the condition.

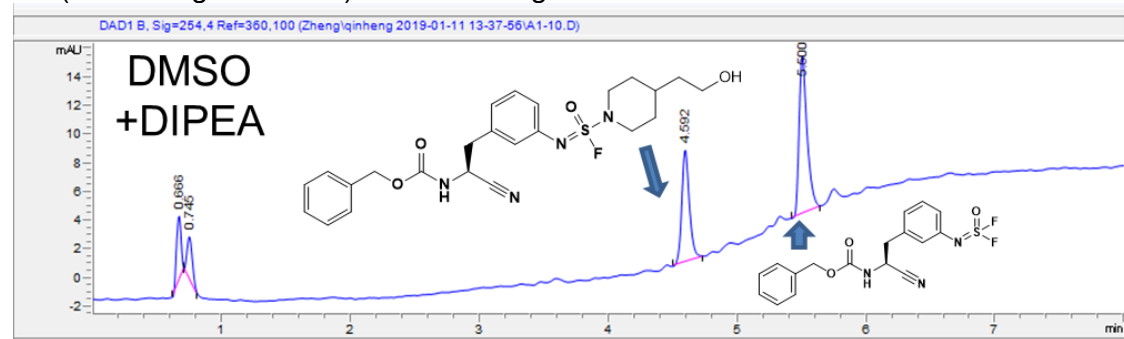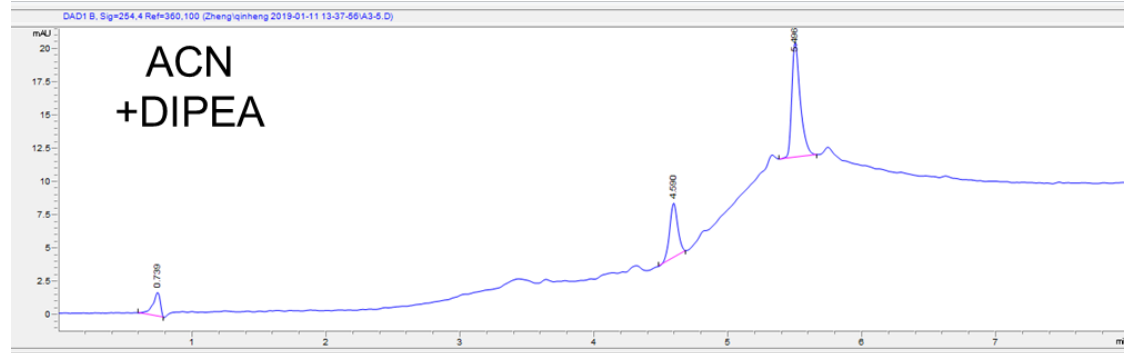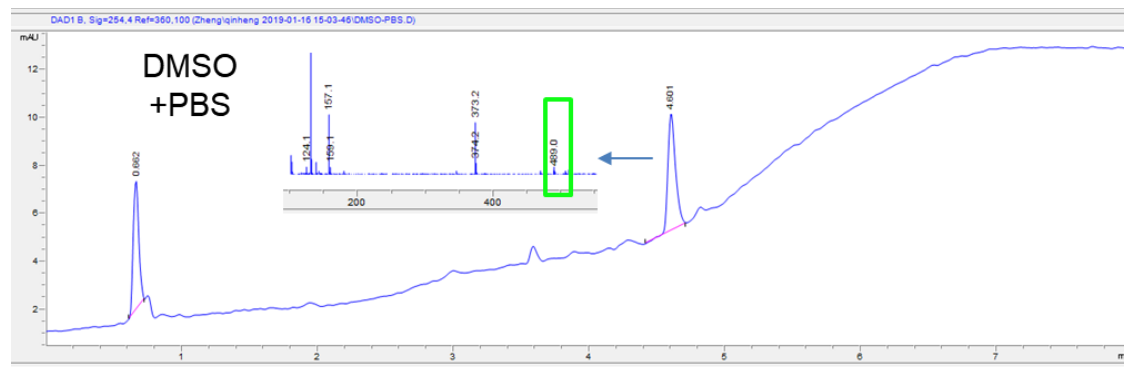

**Table S3.** Scope of SuFEx reactions in the HT library synthesis. Reaction between compound **4** and representative amines was monitored using LC-CAD-MS<sup>n</sup>. The chromatograms are shown in supporting data.

| amine                                                                                                                               | Target % | NH <sub>2</sub> % | Target conc <sup>*</sup> | NH <sub>2</sub> conc <sup>*</sup> |
|-------------------------------------------------------------------------------------------------------------------------------------|----------|-------------------|--------------------------|-----------------------------------|
| 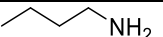                                                   | 71       | 24                | 76                       | 26                                |
| <br>4-Amino-1-butanol                              | 73       | 18                | 82                       | 18                                |
|                                                    | 77       | 12                | 108                      | 15                                |
|                                                    | 73       | 14                | 73                       | 14                                |
|                                                    | 64       | 28                | 57                       | 28                                |
|                                                    | 64       | 20                | 76                       | 27                                |
|                                                    | 79       | 18                | 99                       | 21                                |
|                                                    | 80       | 15                | 105                      | 19                                |
|                                                    | 40       | 39                | 37                       | 48                                |
|                                                    | 77       | 14                | 96                       | 19                                |
|                                                    | 73       | 19                | 71                       | 18                                |
|                                                   | 49       | 30                | 101                      | 15                                |
| <br>trans-2-Phenylcyclopropylamine hydrochloride | 67       | 12                | 95                       | 18                                |
|                                                  | 40       | 56                | 35                       | 61                                |
|                                                  | 37       | 31                | 45                       | 49                                |
|                                                  | 49       | 30                | 52                       | 36                                |
|                                                  | 58       | 6                 | 134                      | 8                                 |
|                                                  | 64       | 18                | 133                      | 24                                |
|                                                  | 63       | 25                | 98                       | 28                                |
|                                                  | 60       | 21                | 106                      | 27                                |
|                                                  | 72       | 17                | 132                      | 21                                |
|                                                  | 46       | 42                | 65                       | 44                                |
|                                                  | 31       | 28                | 51                       | 43                                |
|                                                  | 36       | 30                | 41                       | 24                                |
|                                                  | 4        | 85                | 3                        | 83                                |
|                                                  | 0        | 81                | 0                        | 75                                |

<sup>\*</sup>Concentration was estimated based on a standard curve of representative molecules shown in Supporting data LC-CAD.

**Table S4.** Secondary amine library information and their potency in the screening.

| CAS                                              | Structure                                                                           | MW     | <b>3</b>               |                       | <b>4</b>             |                       |
|--------------------------------------------------|-------------------------------------------------------------------------------------|--------|------------------------|-----------------------|----------------------|-----------------------|
|                                                  |                                                                                     |        | % inhibition at 250 nM | IC <sub>50</sub> (nM) | % inhibition at 2 μM | IC <sub>50</sub> (nM) |
| 5382-16-1                                        | 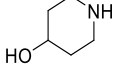   | 101    | 78                     | 46                    | 66                   | 136                   |
| 16652-71-4                                       |    | 241.7  | 69                     | 152                   | 49                   | 318                   |
| 36520-39-5                                       |    | 93.56  | 76                     | 43                    | 55                   | 180                   |
| 6921-28-4                                        |    | 93.13  | 48                     | 185                   | 29                   | 724                   |
| 111-95-5                                         |    | 133    | 48                     | 284                   | 28                   | 857                   |
| (1R,2S,5R,6S)-9-azabicyclo[4.2.1]nonane-2,5-diol |    | 157    | 71                     | 154                   | 43                   | 451                   |
| 626-56-2                                         |    | 99.18  | 51                     | 243                   | 31                   | 600                   |
| 109-01-3                                         |   | 100.16 | 54                     | 160                   | 40                   | 346                   |
| 18621-18-6                                       |  | 109.56 | 72                     | 60                    | 59                   | 135                   |
| 16369-21-4                                       |  | 103.17 | 45                     | 441                   | 15                   | 1600                  |
| 101-83-7                                         |  | 181    | 39                     | 423                   | 24                   | 1050                  |
| 60399-02-2                                       |  | 173.64 | 78                     | 133                   | 59                   | 256                   |
| 7755-92-2                                        |  | 114.15 | 68                     | 217                   | 56                   | 296                   |
| 109-01-3                                         |  | 100    | 58                     | 218                   | 41                   | 341                   |
| 111-42-2                                         |  | 105    | 54                     | 317                   | 33                   | 772                   |
| 172603-05-3                                      |  | 200    | 87                     | 68                    | 68                   | 128                   |
| 6511-88-2                                        |  | 181    | 64                     | 158                   | 49                   | 298                   |
| 99724-19-3                                       |  | 186    | 83                     | 79                    | 62                   | 149                   |



|                 |                                                                                     |        |    |     |    |      |
|-----------------|-------------------------------------------------------------------------------------|--------|----|-----|----|------|
| 745048<br>-12-8 | 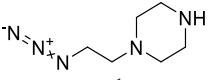   | 155    | 73 | 136 | 64 | 156  |
|                 |    | 173    | 71 | 179 | 50 | 274  |
|                 |    | 198.11 | 82 | 74  | 60 | 114  |
| 35161-<br>71-8  |    | 69.11  | 45 | 316 | 30 | 876  |
|                 |    | 87     | 61 | 90  | 42 | 299  |
|                 |    | 99     | 55 | 248 | 34 | 616  |
|                 |    | 45     | 56 | 113 | 40 | 666  |
|                 |    | 73     | 40 | 451 | 15 | 1290 |
|                 |    | 71     | 82 | 72  | 46 | 346  |
| 51-35-4         |    | 131.13 | 50 | 600 | 30 | 1030 |
| 609-36-<br>9    |    | 115.13 | 49 | 355 | 29 | 811  |
| 344-25-<br>2    |    | 115    | 50 | 410 | 38 | 565  |
| 110-85-<br>0    |   | 86     | 67 | 108 | 54 | 216  |
| 768-66-<br>1    |  | 141.25 | 58 | 354 | 40 | 812  |
| 2812-<br>46-6   |  | 171.24 | 61 | 235 | 40 | 437  |
| 51207-<br>66-0  |  | 154.25 | 62 | 298 | 31 | 830  |
| 1484-<br>84-0   |  | 129.2  | 46 | 425 | 21 | 1220 |
| 177-11-<br>7    |  | 143.18 | 89 | 58  | 64 | 226  |
| 169447<br>-86-3 |  | 276.38 | 50 | 664 | 19 | 971  |
| 2328.1<br>2.3   |  | 229.7  | 85 | 15  | 56 | 88   |
| 622-26-<br>4    |  | 129.2  | 89 | 56  | 73 | 130  |
| 1683-<br>49-4   |  | 282    | 74 | 76  | 40 | 559  |
| 31252-<br>42-3  |  | 175    | 52 | 207 | 21 | 2360 |

|               |                                                                                                                                                                              |        |    |      |    |      |
|---------------|------------------------------------------------------------------------------------------------------------------------------------------------------------------------------|--------|----|------|----|------|
| 39546-32-2    | 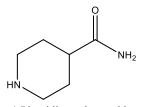<br>4-Piperidinecarboxamide                                                                 | 128    | 90 | 35   | 72 | 114  |
| 57988-58-6    | <br>4-(4-Bromophenyl)-4-piperidinol                                                         | 256    | 79 | 38   | 35 | 484  |
| 196204-01-0   | <br>4-(4'-Carboxyphenyl)piperidine (CAS 196204-01-0)                                        | 205    | 85 | 11   | 53 | 105  |
| 115395-0-54-9 | <br>(R)-Pyrrolidine-3-carbonitrile hydrochloride                                            | 132.59 | 79 | 64   | 67 | 150  |
| 115395-0-49-2 | <br>(S)-Pyrrolidine-3-carbonitrile hydrochloride                                            | 132.59 | 80 | 70   | 65 | 202  |
| 136725-53-6   | <br>(S)-(+)-3-Fluoropyrrolidine hydrochloride<br>Caution: Stereochemical terms discarded: + | 126    | 87 | 49   | 65 | 171  |
| 6000-50-6     | <br>2,3-Dihydro-1H-Pyrrolo[3,4-C]Pyridine dihydrochloride                                  | 193    | 75 | 152  | 66 | 156  |
| 132958-72-6   | <br>(R)-(-)-3-(Dimethylamino)pyrrolidine<br>Caution: Stereochemical terms discarded: +    | 114    | 69 | 167  | 53 | 280  |
| 132883-44-4   | <br>(S)-(+)-3-(Dimethylamino)pyrrolidine                                                  | 114    | 69 | 173  | 54 | 439  |
| 63468-63-3    | <br>2,5-Dihydro-1H-pyrrole hydrochloride                                                  | 105.57 | 82 | 81   | 56 | 227  |
| 147740-02-1   | <br>6,7-Dihydro-5H-pyrrolo[3,4-b]pyridine DiHCl                                           | 193.1  | 79 | 124  | 66 | 121  |
|               | <br>ethyl 3-phenylaziridine-2-carboxylate                                                 | 282    | 42 | 133  | 41 | 563  |
|               | <br>4-(benzyl(phenylamino)pyrrolidin-1-yl)pyrrolidine-2-carboxylic acid                   | 191    | 47 | 472  | 23 | 1440 |
|               | <br>1-(4((R,S)-1,2-diphenyl-2-piperidin-1-yl)butyl)-5-pyrroline                           | 420    | 43 | 1050 | 18 | 3380 |
|               | <br>1-(4((R,S)-1,2-diphenyl-2-piperidin-1-yl)butyl)-5-pyrroline                           | 367    | 55 | 643  | 42 | 2270 |
| 1121-92-2     | <br>Azacyclooctane                                                                        | 113.2  | 51 | 190  | 27 | 574  |
| 11-49-9       | <br>HOMOPIPERIDINE                                                                        | 99.17  | 66 | 153  | 36 | 433  |
| 505-19-1      | <br>Hexahydroindazaine                                                                    | 86.14  | 31 | 547  | 16 | 1110 |
| 1126-09-6     | <br>ethyl isopropenylcarbamate                                                            | 157    | 92 | 28   | 66 | 128  |
| 1135-40-6     | <br>5-(cyclohexylamino)-5-oxopentanoic acid                                               | 221    | 38 | 453  | 16 | 1360 |

|             |                                                                                   |        |    |     |    |      |
|-------------|-----------------------------------------------------------------------------------|--------|----|-----|----|------|
| 29915-38-6  | 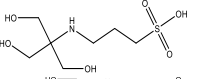 | 243    | 36 | 423 | 14 | 1130 |
| 7365-44-8   |  | 229    | 38 | 453 | 16 | 1390 |
| 68399-81-5  |  | 259.28 | 39 | 534 | 17 | 1390 |
| 7365-82-4   |  | 182    | 41 | 495 | 16 | 1530 |
| 165528-81-4 |  | 228    | 83 | 63  | 46 | 205  |
| 498-94-2    |  | 129    | 66 | 120 | 97 | 90   |

IC<sub>50</sub> was estimated by measuring inhibition at 2, 1, 0.5, and 0.25 μM.

**Table S5.** Primary amine library information and their potency in the screening.

| CAS        | Structure                                                                                                                    | MW     | <b>3</b><br>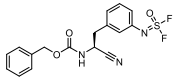<br>Inhibition % at<br>250 nM | <b>4</b><br><br>% inhibition<br>at 2 μM |
|------------|------------------------------------------------------------------------------------------------------------------------------|--------|-----------------------------------------------------------------------------------------------------------------------------|----------------------------------------------------------------------------------------------------------------------------|
| 2978-58-7  | <br>2-Methyl-3-buten-2-amine                | 83     | 23                                                                                                                          | 41                                                                                                                         |
| 929-06-6   | <br>2-(2-Aminoethoxy)ethanol                | 105.14 | 32                                                                                                                          | 42                                                                                                                         |
| 2906-12-09 | <br>3-Isopropoxypropylamine                 | 117.19 | 21                                                                                                                          | 45                                                                                                                         |
| 13325-10-5 | <br>4-Amino-1-butanol                       | 89     | 35                                                                                                                          | 49                                                                                                                         |
| 1003-03-8  | <br>Cyclopentylamine                        | 85.15  | 22                                                                                                                          | 44                                                                                                                         |
| 109-76-2   | <br>1,3-Diaminopropane                      | 74.12  | 38                                                                                                                          | 42                                                                                                                         |
| 109-73-9   | <br>3-Amino-1-propanol                      | 73     | 18                                                                                                                          | 41                                                                                                                         |
| 156-87-6   | <br>3-Amino-1-propanol                     | 75     | 33                                                                                                                          | 44                                                                                                                         |
| 6291-84-5  | <br>3-(Methylamino)propylamine            | 88     | 29                                                                                                                          | 60                                                                                                                         |
| 2867-59-6  | <br>3-Amino-butan-1-ol                    | 89     | 22                                                                                                                          | 46                                                                                                                         |
| 115-70-8   | <br>2-Amino-2-ethyl-1,3-propanediol       | 119    | 20                                                                                                                          | 43                                                                                                                         |
| 87120-72-7 | <br>4-Amino-1-Boc-piperidine              | 200    | 24                                                                                                                          | 47                                                                                                                         |
| 60142-96-3 | <br>Gabapentin                            | 171    | 21                                                                                                                          | 55                                                                                                                         |
| 120-20-7   | <br>3-(3,4-dimethoxyphenyl)propan-1-amine | 181    | 64                                                                                                                          | 51                                                                                                                         |
| 3731-52-0  | <br>3-Picolylamine                        | 108    | 35                                                                                                                          | 53                                                                                                                         |
| 3300-51-4  | <br>4-(Trifluoromethyl)benzylamine        | 175    | 26                                                                                                                          | 48                                                                                                                         |

|             |                                                                                                                                        |        |    |    |
|-------------|----------------------------------------------------------------------------------------------------------------------------------------|--------|----|----|
| 26177-43-5  | 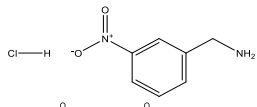                                                      | 189    | 40 | 81 |
| 1118-89-4   | <br>L-Glutamic acid diethyl ester hydrochloride       | 240    | 21 | 45 |
| 123-00-2    | <br>3-Morpholinopropylamine                           | 144    | 34 | 47 |
| 156917-23-6 |                                                       | 407    | 23 | 55 |
| 57260-73-8  | <br>N-Boc-ethylenediamine                             | 160    | 38 | 44 |
| 439117-39-2 | <br>[2-(AMINOMETHYL)-5-CHLOROPHENYL]METHANOL          | 172    | 44 | 74 |
| 2491-18-1   | <br>L-Methionine methyl ester hydrochlorid            | 200    | 19 | 44 |
| 56-92-8     | <br>Histamine dihydrochloride                         | 184    | 37 | 47 |
| 696-60-6    | <br>4-Hydroxybenzylamine                            | 123    | 59 | 65 |
| 100-46-9    | <br>Benzylamine                                     | 107    | 56 | 64 |
| 63649-14-9  | <br>5-Aminoglutamic Acid Benzyl Ester Tosylate      | 379    | 60 | 83 |
| 22572-33-4  | <br>S-Benzylethylamine hydrochloride                | 204    | 51 | 82 |
| 2039-66-9   | <br>2-(2-Aminoethyl)phenol                          | 137.18 | 65 | 69 |
| 35303-76-5  | <br>4-(2-Aminoethyl)benzenesulfonamide              | 200    | 58 | 52 |
| 16652-64-5  | <br>O-Benzyl-L-tyrosine<br>Molecular Weight: 271.32 | 271    | 22 | 42 |

|             |                                                                                                                                                                                             |     |    |    |
|-------------|---------------------------------------------------------------------------------------------------------------------------------------------------------------------------------------------|-----|----|----|
| 3417-91-2   | <p>Molecular Weight: 231.68</p> 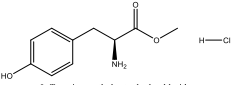 <p>L-Tyrosine methyl ester hydrochloride<br/>Molecular Weight: 131.18</p> | 232 | 27 | 77 |
| 60-32-2     |  <p>6-Aminocaproic acid<br/>Molecular Weight: 146.20</p>                                                   | 131 | 27 | 50 |
| 57213-48-6  |  <p>3-Cyano-L-phenylalanine<br/>Molecular Weight: 154.14</p>                                               | 190 | 22 | 45 |
| 5466-22-8   |  <p>Aminocetonitrile sulfate<br/>Molecular Weight: 210.19</p>                                              | 154 | 21 | 43 |
| 19883-74-0  |  <p>L-3-Nitrophenylalanine<br/>Caution: Stereochemical terms discarded: 1<br/>Molecular Weight: 115.22</p> | 210 | 19 | 42 |
| 4083-572    |  <p>2,4-Dimethylpentan-3-amine<br/>Molecular Weight: 146.19</p>                                            | 115 | 22 | 45 |
| 14464-68-7  |  <p>3-(Trifluoromethyl)-L-phenylalanine<br/>Molecular Weight: 233.19</p>                                   | 146 | 25 | 50 |
| 80126-51-8  |  <p>3-Chloro-L-phenylalanine<br/>Molecular Weight: 183.18</p>                                              | 233 | 25 | 44 |
| 19883-77-3  |  <p>m-Fluoro-L-phenylalanine<br/>Molecular Weight: 199.63</p>                                            | 199 | 24 | 44 |
| 103616-89-3 |  <p>2-Chloro-L-phenylalanine<br/>Molecular Weight: 117.15</p>                                            | 183 | 25 | 43 |
| 72-18-4     |  <p>L-Valine<br/>Molecular Weight: 229.70</p>                                                            | 199 | 22 | 44 |
| 3182-93-2   |  <p>L-Phenylalanine ethyl ester hydrochloride</p>                                                        | 117 | 22 | 43 |
| 28211-04-3  | Poly epsilon L-lysine HCl                                                                                                                                                                   | 230 | 20 | 43 |
| 6850-28-8   |                                                                                                          | 385 | 22 | 44 |
| 3048-01-09  |  <p>Molecular Weight: 59.11</p>                                                                          | 181 | 26 | 50 |
| 107-10-8    |  <p>Propylamine</p>                                                                                      | 175 | 24 | 54 |
|             |                                                                                                                                                                                             | 59  | 21 | 43 |

|             |                                                                                                                                       |       |    |    |
|-------------|---------------------------------------------------------------------------------------------------------------------------------------|-------|----|----|
| 5978-75-6   | 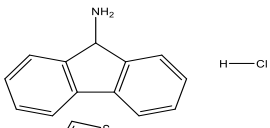                                                     | 217.7 | 23 | 48 |
| 30433-91-1  |                                                      | 127   | 37 | 57 |
| 75-64-9     |                                                      | 73    | 22 | 42 |
| 108607-02-9 |                                                      | 239   | 23 | 43 |
| 100-82-3    |                                                      | 125   | 74 | 82 |
| 20781-21-9  |                                                      | 204   | 62 | 64 |
| 132388-58-0 |                                                      | 374   | 22 | 62 |
| 2393-23-9   |                                                     | 137   | 47 | 54 |
| 140-75-0    |                                                    | 125   | 53 | 63 |
| 593-51-1    |                                                    | 68    | 37 | 39 |
| 20859-02-3  | <br>Molecular Weight: 321.80                       | 131   | 23 | 38 |
| 04-12-5198  | <br>O-Benzyl-L-tyrosine methyl ester hydrochloride | 322   | 22 | 47 |
| 1798-50-1   |                                                    | 304   | 48 | 32 |
| 32462-30-9  |                                                    | 167   | 23 | 56 |
| 18542-42-2  |                                                    | 195   | 48 | 83 |
| 18542-42-2  |                                                    | 91    | 25 | 48 |

|             |                                                                                     |     |    |    |
|-------------|-------------------------------------------------------------------------------------|-----|----|----|
| 459-19-8    | 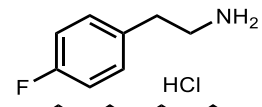   | 176 | 61 | 61 |
|             |    | 132 | 45 | 62 |
| 150517-77-4 |    | 193 | 26 | 55 |
| 15996-76-6  |    | 169 | 37 | 45 |
| 104-86-9    |    | 162 | 77 | 68 |
| 7663-77-6   |    | 142 | 34 | 56 |
| 156-41-2    |    | 156 | 54 | 53 |
| 3886-70-2   |  | 171 | 34 | 50 |
| 696-40-2    |  | 233 | 43 | 70 |
| 2432-99-7   |  | 201 | 26 | 67 |
| 70-78-0     |  | 307 | 29 | 86 |
| 492-41-1    |  | 151 | 22 | 45 |
| 4747-21-1   |  | 73  | 23 | 42 |
| 2017-67-6   |  | 208 | 72 | 53 |



|            |                                                                                              |     |    |    |
|------------|----------------------------------------------------------------------------------------------|-----|----|----|
| 78-81-9    | 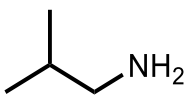            | 73  | 26 | 45 |
| 2935-35-5  |             | 151 | 24 | 46 |
| 4104-45-4  | <br>racemic | 167 | 23 | 72 |
| 1986-47-6  |             | 105 | 57 | 59 |
| 04-12-5147 | <br>HCl     | 170 | 81 | 74 |
| 150-30-1   | <br>HCl     | 244 | 23 | 44 |
| 13288-57-8 | <br>HCl     | 165 | 23 | 47 |
| 16874-09-2 | <br>HCl    | 282 | 22 | 40 |
| 349-46-2   | <br>HCl   | 339 | 36 | 51 |
| 04-12-5047 | <br>HCl   | 490 | 28 | 44 |
| 6893-26-1  | <br>HCl   | 297 | 23 | 53 |
| 103        | <br>HCl   | 198 | 23 | 43 |
| 240        | <br>HCl   | 240 | 23 | 46 |
| 103        | <br>HCl   | 103 | 54 | 45 |
| 147        | D-glutamic acid                                                                              | 147 | 21 | 42 |

|             |                                                                                                                |     |    |    |
|-------------|----------------------------------------------------------------------------------------------------------------|-----|----|----|
|             | 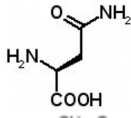                              | 132 | 22 | 42 |
| 73-32-5     |                               | 131 | 22 | 42 |
| 27894-50-4  | <br>HCl<br>HCl                | 331 | 24 | 45 |
| 51537-21-4  |                               | 253 | 26 | 44 |
| 18905-73-2  | <br>HCl                       | 336 | 24 | 43 |
| 14907-27-8  |                               | 255 | 27 | 45 |
| 04-13-5043  | <br>HCl<br>HCl                | 166 | 26 | 78 |
|             | <br><b>L-Valyl-L-Leucine</b> | 230 | 23 | 44 |
|             | <br>HCl                     | 154 | 37 | 60 |
| 200353-65-7 | <br>HCl                     | 214 | 22 | 52 |
| 04-12-5044  | <br>HCl                     | 125 | 45 | 42 |
| 145306-65-6 |                             | 195 | 21 | 42 |
| 21394-81-0  |                             | 184 | 24 | 45 |

|             |                                                                                     |     |    |    |
|-------------|-------------------------------------------------------------------------------------|-----|----|----|
| 13188-89-1  | 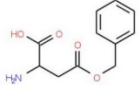   | 223 | 34 | 51 |
| 75/04/07    |    | 45  | 28 | 44 |
| 141-43-5    |    | 61  | 40 | 40 |
| 52142-01-5  |    | 398 | 23 | 50 |
|             |    | 351 | 52 | 65 |
| 69320-89-4  |    | 224 | 24 | 45 |
| 15100-75-1  |    | 258 | 26 | 45 |
| 04-12-5075  |    | 296 | 24 | 48 |
| 1738-76-7   |   | 337 | 23 | 54 |
| 32677-01-3  |  | 296 | 26 | 49 |
| 13033-84-6- |  | 216 | 29 | 47 |
| 14173-41-2  |  | 291 | 25 | 44 |
| 2791-84-6   |  | 500 | 25 | 47 |
| 63594-37-6  |  | 393 | 23 | 54 |
| 5854-78-4   |  | 231 | 23 | 44 |
| 23239-35-2  |  | 179 | 24 | 43 |

|                   |                                                                                                   |     |    |    |
|-------------------|---------------------------------------------------------------------------------------------------|-----|----|----|
| 632-12-2          | 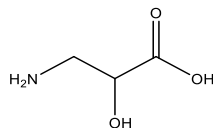<br>DL-Isoserine | 105 | 22 | 63 |
| 7389-87-9         | <br>• 2HCl       | 242 | 22 | 50 |
| 04-12-5004        | <br>• HCl        | 216 | 22 | 44 |
| 13188-89-1        | <br>• HCl        | 223 | 24 | 48 |
| 5856-62-2         |                  | 89  | 27 | 49 |
| 13472-00-9        |                  | 136 | 49 | 58 |
| 5856-63-3         |                  | 89  | 28 | 48 |
| 1492-24-6         |                 | 103 | 22 | 45 |
|                   |                | 146 | 22 | 44 |
|                   | L-alanyl-glycine                                                                                  |     |    |    |
| 2432-74-8         |                | 112 | 41 | 57 |
| 56-12-2           |                | 103 | 21 | 48 |
| 929-17-9          |                | 145 | 20 | 47 |
| 1187-42-4         |                | 108 | 17 | 44 |
| 4-amino-1-butanol |                | 89  | 52 | 49 |
| 96-20-8           |                | 89  | 26 | 48 |
| 50910-54-8        | <br>• HCl      | 152 | 23 | 53 |
|                   |                | 121 | 11 | 37 |
|                   |                | 165 | 28 | 78 |

|             |                                                                                     |     |    |    |
|-------------|-------------------------------------------------------------------------------------|-----|----|----|
| 79286-79-6  | 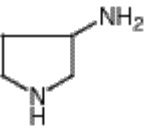   | 86  | 43 | 79 |
| 133437-08-8 |    | 174 | 54 | 76 |
| 24123-14-6  |    | 118 | 20 | 34 |
| 5098-14-6   |    | 253 | 15 | 44 |
| 2079-89-2   |    | 128 | 22 | 44 |
| 1002-57-9   |   | 159 | 32 | 65 |
| 693-57-2    |  | 190 | 21 | 43 |
| 17702-88-4  |  | 215 | 24 | 71 |
| 23159-07-1  |  | 187 | 21 | 40 |
| 1197-18-8   |  | 128 | 29 | 36 |
| 163061-73-2 |  | 157 | 22 | 55 |
| 107-95-9    |  | 149 | 21 | 46 |
| 5036-48-6   |  | 89  | 21 | 55 |
| 108-91-8    |  | 125 | 41 | 50 |
| 768-94-5    |  | 99  | 28 | 55 |
|             |  | 151 | 29 | 49 |

**Table S6.** SpeB in complex with compound **5** x-ray data processing and structure refinement statistics.

| Compound <b>5</b>                                 |                        |
|---------------------------------------------------|------------------------|
| PDB ID                                            | 6UQD                   |
| Wavelength (Å)                                    | 0.97946                |
| Space group                                       | P2 <sub>1</sub>        |
| Unit Cell Parameters (a,b,c) (Å)                  | 45.62,115.52,50.27     |
| ( $\alpha,\beta,\gamma$ ) (°)                     | 90.0,112.6,90.0        |
| Data Processing                                   |                        |
| Resolution range (Å) (outer shell)                | 43.07-2.02 (2.05-2.02) |
| Unique reflections                                | 29,212 (1,464)         |
| Completeness (%)                                  | 94.5 (93.1)            |
| Redundancy                                        | 2.6 (2.5)              |
| R <sub>meas</sub> (%) <sup>a</sup>                | 23.6 (78.6)            |
| R <sub>merge</sub> (%) <sup>b</sup>               | 18.2 (54.4)            |
| R <sub>p.i.m.</sub> (%) <sup>c</sup>              | 13.6 (45.6)            |
| Average I/ $\sigma$ (I)                           | 7.2 (2.1)              |
| Wilson B (Å <sup>2</sup> )                        | 10.6                   |
| Refinement                                        |                        |
| Resolution range (Å)                              | 43.07-2.02 (2.09-2.02) |
| No. reflections (test set) <sup>d</sup>           | 29,181 (1,384)         |
| R <sub>cryst</sub> (%) <sup>e</sup>               | 21.4 (27.3)            |
| R <sub>free</sub> (%)                             | 25.7 (34.1)            |
| Protein atoms / waters / ligands                  | 3867 / 385 / 68        |
| CV coordinate error (Å) <sup>f</sup>              | 0.25                   |
| Rmsd bonds (Å) / angles (°)                       | 0.021 / 0.55           |
| B-values protein/waters/ligands (Å <sup>2</sup> ) | 13.6 / 23.8 / 32.1     |
| Ramachandran Statistics (%)                       |                        |
| Most favored                                      | 98.8                   |
| Additional allowed                                | 1.2                    |
| Generously allowed                                | 0.0                    |

<sup>a</sup>R<sub>meas</sub> =  $\{\sum_{hkl}[N(N-1)]^{1/2}\sum_i |I_{i(hkl)} - \langle I_{(hkl)} \rangle|\} / \sum_{hkl} \sum_i I_{i(hkl)}$ , where  $I_{i(hkl)}$  are the observed intensities,  $\langle I_{(hkl)} \rangle$  are the average intensities and N is the multiplicity of reflection hkl. <sup>b</sup>R<sub>merge</sub> =  $\sum_{hkl} \sum_i |I_{i(hkl)} - \langle I_{(hkl)} \rangle| / \sum_{hkl} \sum_i I_{i(hkl)}$  where  $I_{i(hkl)}$  is the  $i^{\text{th}}$  measurement of reflection h and  $\langle I_{(hkl)} \rangle$  is the average measurement value. <sup>c</sup>R<sub>p.i.m.</sub> (precision-indicating R<sub>merge</sub>) =  $\sum_{hkl} [1/(N_{hkl} - 1)]^{1/2} \sum_i |I_{i(hkl)} - \langle I_{(hkl)} \rangle| / \sum_{hkl} \sum_i I_{i(hkl)}$ . <sup>d</sup>Reflections with I > 0 were used for refinement (Weiss & Hilgenfeld, 1997; Weiss, 2001; Karplus & Diederichs, 2015). <sup>e</sup>R<sub>cryst</sub> =  $\sum_h ||F_{\text{obs}}| - |F_{\text{calc}}|| / \sum |F_{\text{obs}}|$ , where  $F_{\text{obs}}$  and  $F_{\text{calc}}$  are the calculated and observed structure factor amplitudes, respectively. R<sub>free</sub> is R<sub>cryst</sub> with 5.0% test set structure factors. <sup>f</sup>Cross-validated (CV) Luzzati coordinate errors.

**Table S7.** Structure-activity relationships of selected analogs.

| #           | Structure                                                                           | SpeB<br>IC <sub>50</sub><br>(nM) | cLogP <sup>b</sup> | LiPE <sup>c</sup> | MW  | Solubility <sup>d</sup><br>(μM) |
|-------------|-------------------------------------------------------------------------------------|----------------------------------|--------------------|-------------------|-----|---------------------------------|
| 1           | 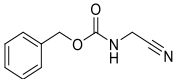   | 14,000 <sup>a</sup>              | 0.94               | 3.9               | 190 | >100                            |
| Sk064-119-2 |    | 29                               | 1.36               | 6.0               | 488 | 25-50                           |
| sk064-149-D |    | 53                               | 4.32               | 2.96              | 553 | ND                              |
| sk064-150-G |    | 71                               | 3.61               | 3.54              | 539 | 25-50                           |
| sk064-150-H |    | 71                               | 3.77               | 3.15              | 483 | 25-50                           |
| sk064-142-1 |    | 93                               | 1.36               | 5.67              | 488 | 12.5-25                         |
| sk064-142-2 |   | 93                               | 2.28               | 4.77              | 489 | >100                            |
| sk064-142-3 |  | 110                              | 4.95               | 2.03              | 565 | ND                              |
| sk064-143-3 |  | 380                              | 3.77               | 2.50              | 483 | 6.25-12.5                       |

IC<sub>50</sub> values were determined using a fluorescence assay against SpeB. [rSpeB] = 20 nM. Reported IC<sub>50</sub> values are the average of triplicates with at least two datum points above and at least two below the IC<sub>50</sub>. The fluorescent-based assay as performed here has a standard error between 10% and 20%, suggesting that differences of two-fold or greater are significant. <sup>a</sup>From Wang *et al.* <sup>b</sup>Predicted value using Chemdraw Ultra 17.1. <sup>c</sup>LiPE = pIC<sub>50</sub> – cLogP. <sup>d</sup>Solubility was measured using a method described previously<sup>12,13</sup>. <sup>e</sup>Microsomal stability and cellular toxicity was measured using a method as described previously<sup>11</sup>.

**Table S8.** Key parameters of selected inhibitors.

| #                                                                           | 1 (Hit)                                                                           | 5 (119-2)                                                                         | 6 (sk064-150H)                                                                     | 7 (sk064-142-2)                                                                     |
|-----------------------------------------------------------------------------|-----------------------------------------------------------------------------------|-----------------------------------------------------------------------------------|------------------------------------------------------------------------------------|-------------------------------------------------------------------------------------|
|                                                                             | 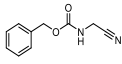 |  |  |  |
| MW                                                                          | 190                                                                               | 488                                                                               | 483                                                                                | 489                                                                                 |
| SpeB IC <sub>50</sub> (nM)                                                  | 14,000 <sup>a</sup>                                                               | 29 ± 4<br>K <sub>i</sub> =18 ± 1                                                  | 71 ± 7                                                                             | 93 ± 10<br>K <sub>i</sub> = 67 ± 3                                                  |
| cLogP                                                                       | 0.94                                                                              | 1.36                                                                              | 3.77                                                                               | 2.28                                                                                |
| Papain IC <sub>50</sub> (μM) <sup>a</sup>                                   | 77 <sup>a</sup>                                                                   | 31                                                                                | -                                                                                  | 10                                                                                  |
| Caspase 3 IC <sub>50</sub> (μM)                                             | -                                                                                 | >100                                                                              | -                                                                                  | >100                                                                                |
| Solubility (μM)                                                             | >100                                                                              | 25-50                                                                             | 25-50                                                                              | >100                                                                                |
| Human liver microsomal stability <i>t</i> <sub>1/2</sub> (min) <sup>e</sup> | -                                                                                 | 13.1                                                                              | 8.9                                                                                | 118                                                                                 |
| % remaining after 40 min incubation                                         | -                                                                                 | 12%                                                                               | 2%                                                                                 | 79%                                                                                 |
| % remaining after 40 min incubation without cofactor                        | -                                                                                 | 94%                                                                               | 105%                                                                               | 79%                                                                                 |
| Cellular toxicity (Jurkat cells) <sup>e</sup>                               | -                                                                                 | 40% growth inhibition at 20 μM                                                    | Not cytotoxic at 20 μM                                                             | Not cytotoxic at 20 μM                                                              |

<sup>a</sup>From Wang *et al.* <sup>b</sup>Predicted value using ChemBiodraw Ultra 17.1. <sup>d</sup>Solubility was measured using a method described previously<sup>12, 13</sup>. <sup>e</sup>Microsomal stability and cellular toxicity was measured using a method as described previously<sup>11</sup>.



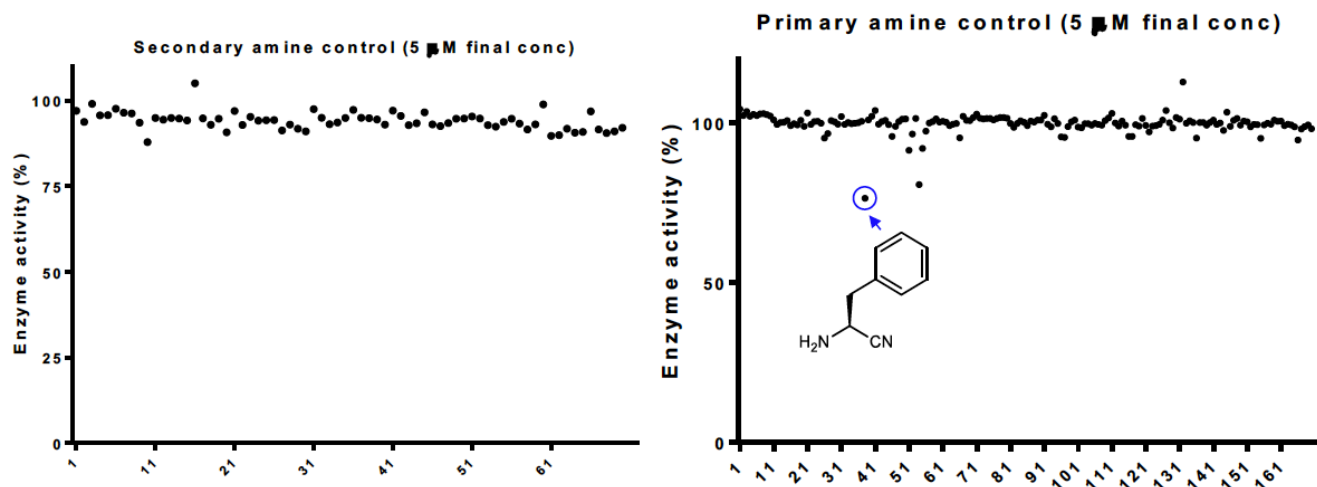

**Figure S1.** Inhibitory potency of amines on SpeB enzyme activity. Most amines did not show inhibition at final concentration at 5  $\mu$ M. The highest inhibition was observed with an amine which is a building block of compound **2** (structure shown in the figure).

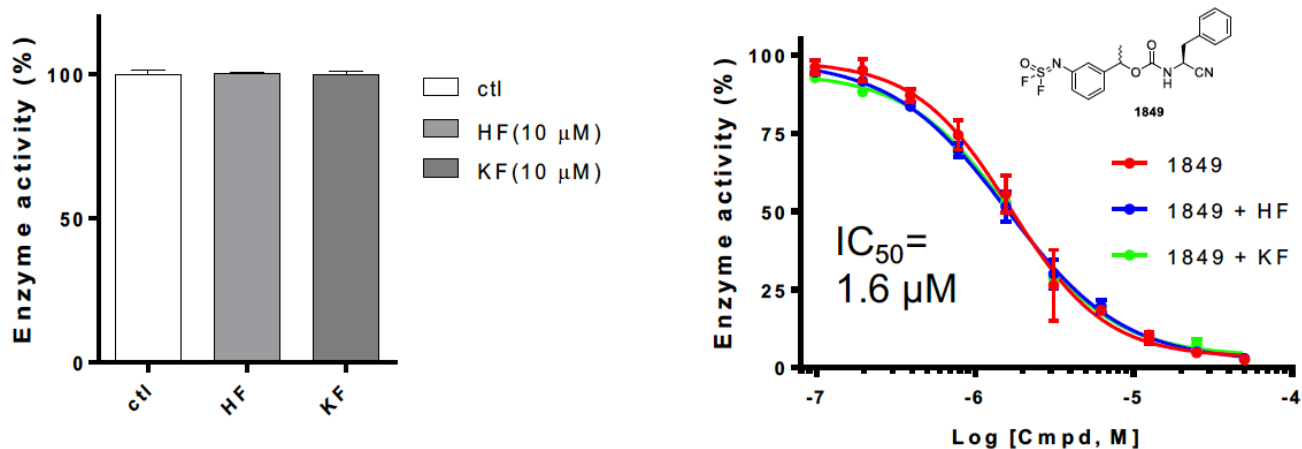

**Figure S2.** Effects of fluoride ion on SpeB enzyme activity and inhibitor potency. (a) Enzyme activity does not change in the presence of fluoride ion (10  $\mu$ M). (b) Inhibitor potency does not change in the presence of fluoride ion (10  $\mu$ M).

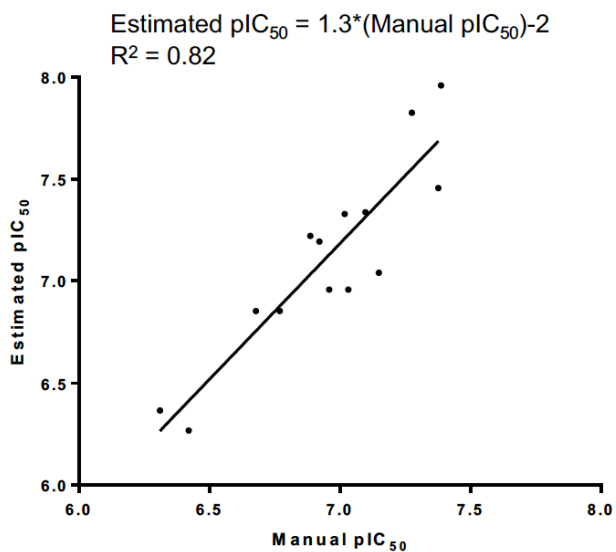

**Figure S3.** Correlation of  $pIC_{50}$  estimated by the measurement of inhibitory potency of reaction mixture vs. manual measurement of  $pIC_{50}$  of pure compounds.

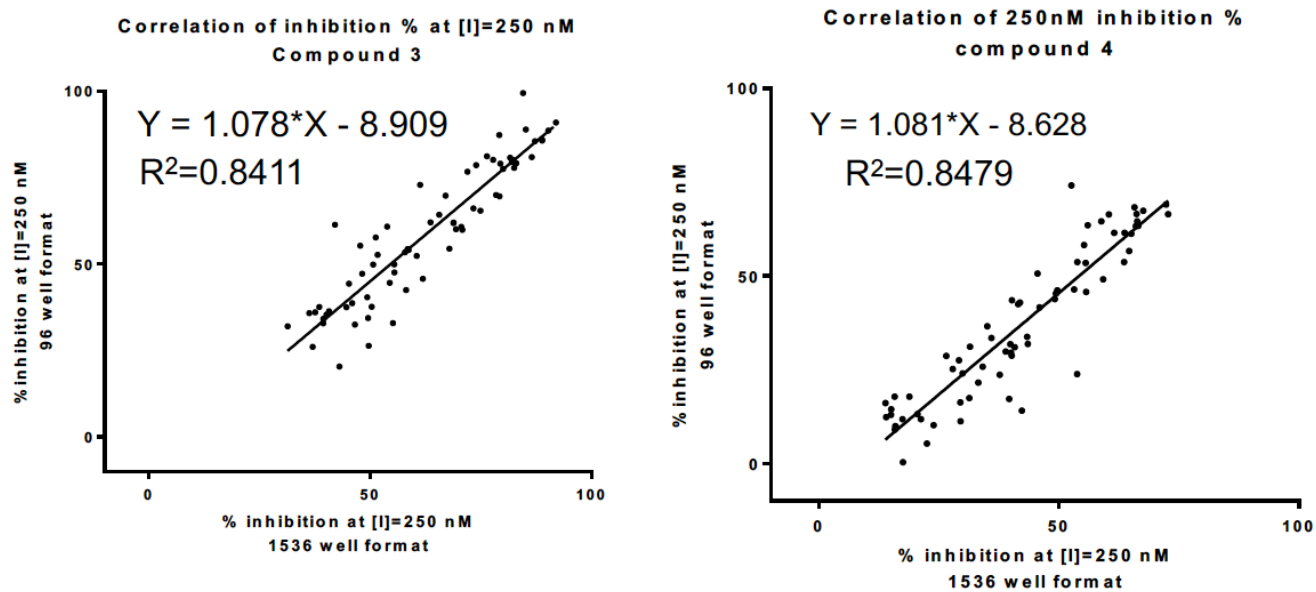

**Figure S4.** Additional correlation of  $pIC_{50}$  between picomole scale synthesis vs. 96 well plate synthesis.

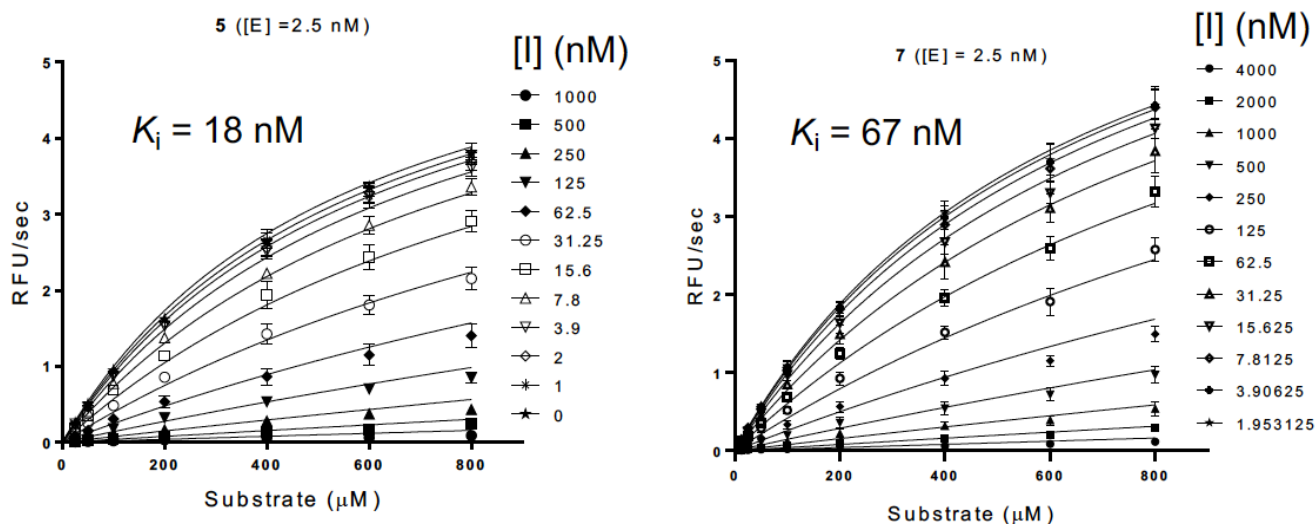

**Figure S5.**  $K_i$  determination of compounds **5** and **7** against SpeB. Enzyme activity was measured as described in the method section. Mean  $\pm$  SD values of three independent experiments are shown. [Recombinant SpeB] = 2.5 nM. Nonlinear fitting to competitive inhibition model gave  $K_i = 18 \pm 1$  nM with  $R^2 = 0.99$  (cmpd **5**) or  $K_i = 67 \pm 3$  nM with  $R^2 = 0.99$  (cmpd **7**).

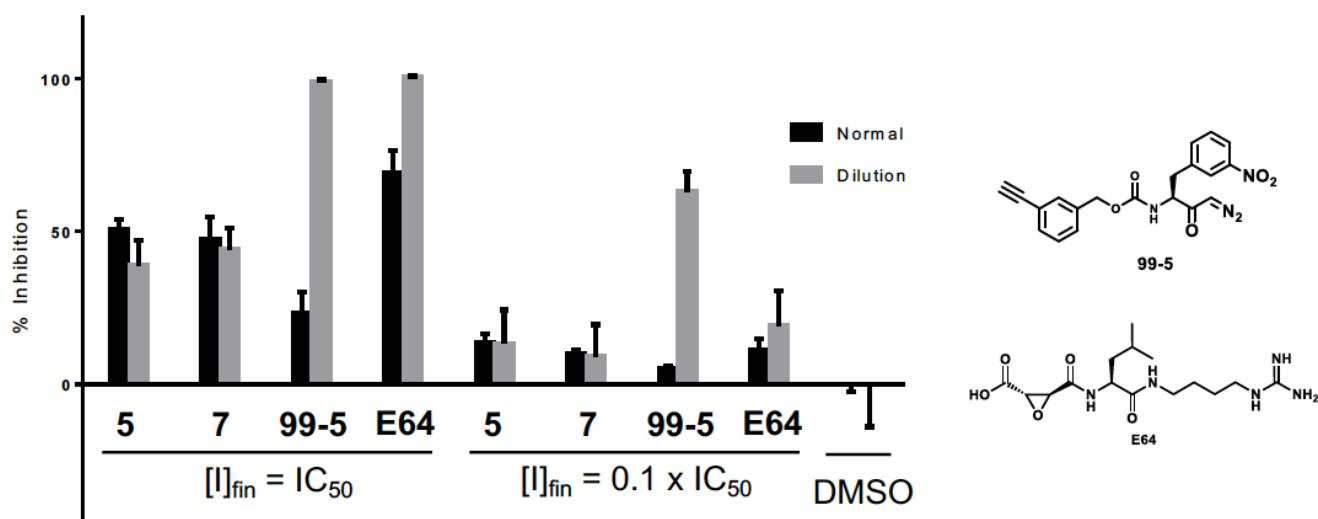

**Figure S6.** Compounds **5** & **7** are reversible inhibitors. Reversibility of the inhibitor binding was assessed using dilution assay as described previously (Copeland, Evaluation of Enzyme Inhibitors in Drug Discovery 2005). Compds **99-5** (SpeB-specific covalent inhibitor, publication in preparation) and E64 (general covalent cysteine protease inhibitor) were used as positive controls. Inhibitors ( $[I] = IC_{50} \times 200$  or  $\times 20$ ) and SpeB ( $[E] = 4 \mu\text{M}$ ) were incubated for 20 min, then diluted 100-fold into buffer. The enzyme activity of the diluted sample was measured ( $[I]_{\text{fin}} = IC_{50} \times 1$  or  $\times 0.1$ ) and the enzyme inhibition was compared between the dilution condition and normal enzyme assay condition. Mean  $\pm$  SD ( $n=4$ ) values are shown.  $[I]_{\text{fin}}$  for each compounds are: 40 or 4 nM (**5**), 90 or 9 nM (**7**), 1,000 or 100 nM (**99-5**), 100 or 10 nM (E64), respectively. Compound **99-5** has  $IC_{50}$  at 1.6  $\mu\text{M}$  against SpeB with 10 min incubation. Raw data are shown in the next figure.

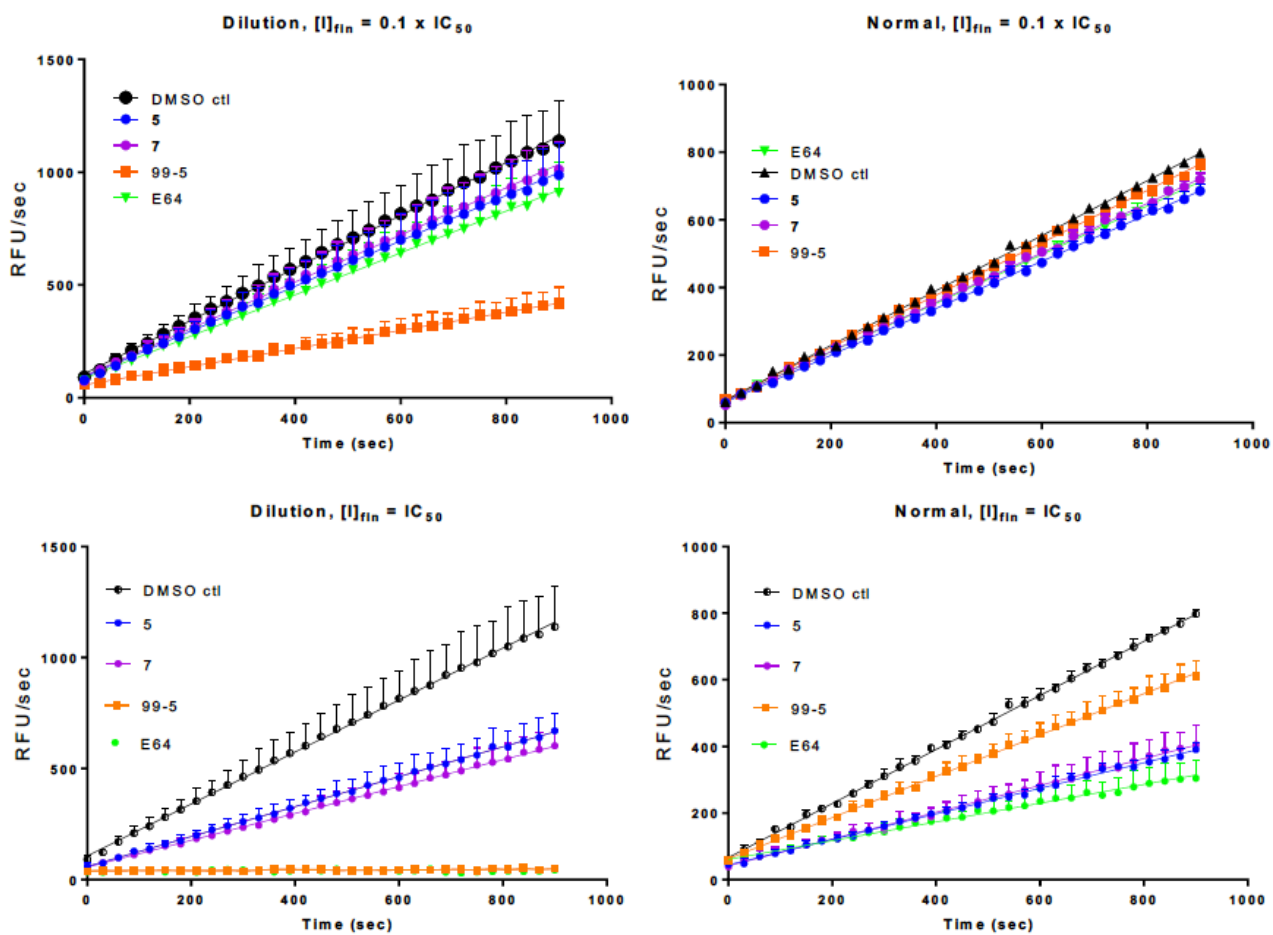

Figure S6. (continued) Compounds 5 & 7 are reversible inhibitors.

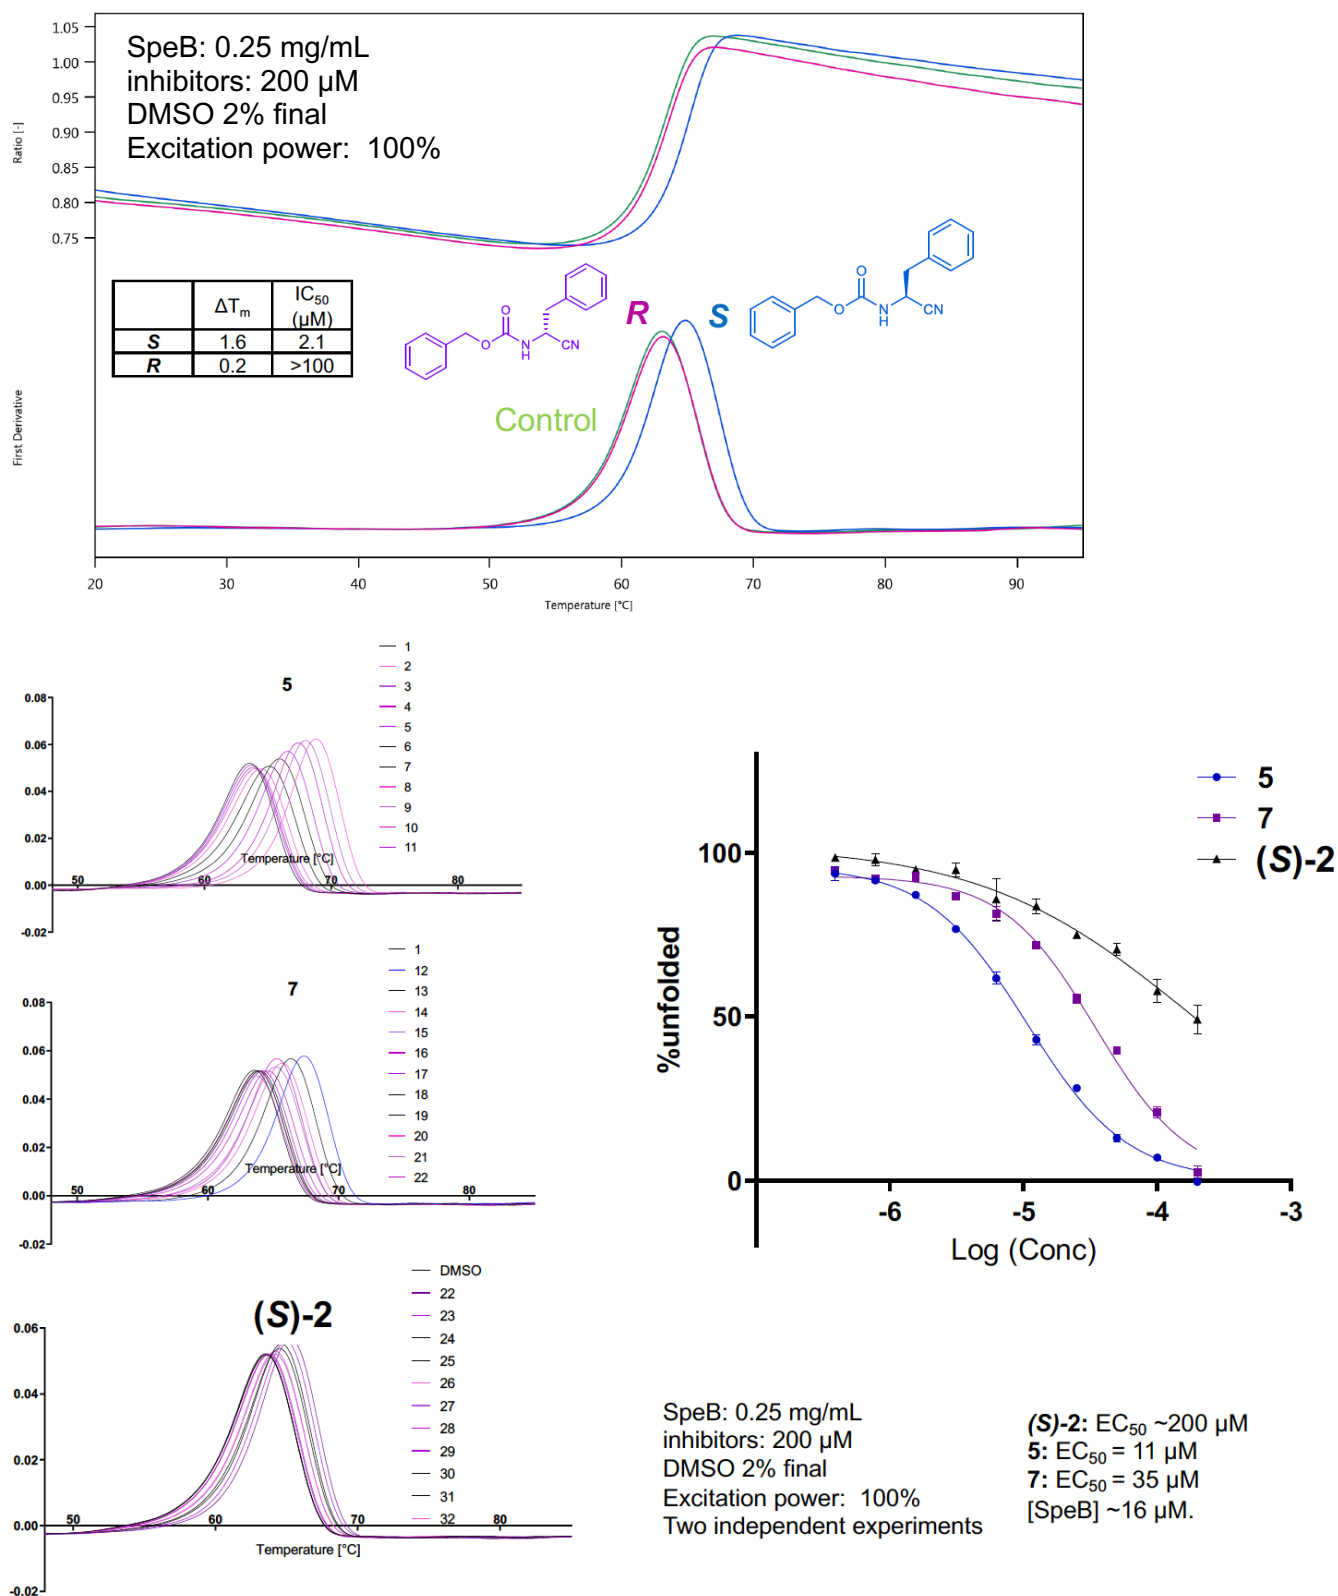

**Figure S7.** Differential scanning fluorimetry melting curves.

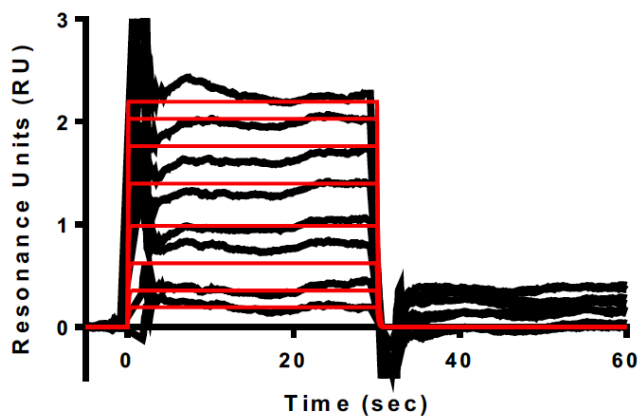

Flow: 30  $\mu$ L/min  
 PBS (7.4) + 5% DMSO  
 rSpeB was immobilized on CM5 chip

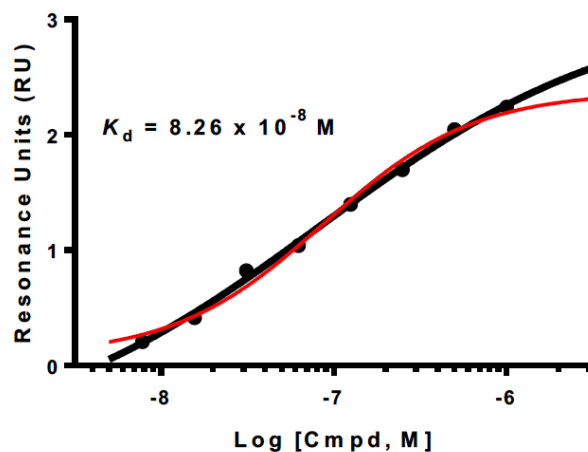

A  $K_d$  value was calculated from a steady-state fit

**Figure S8.** Surface plasmon resonance analysis of compound 5 against rSpeB.

Naïve and final  $2f_o-f_c$  density maps

Naïve  $f_o-f_c$  at  $1.8\sigma$

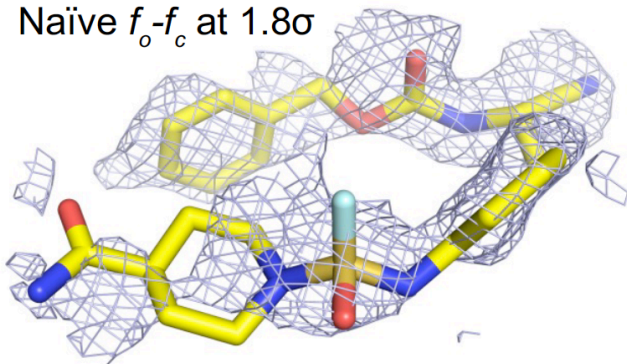

Final  $2f_o-f_c$  at  $1.0\sigma$

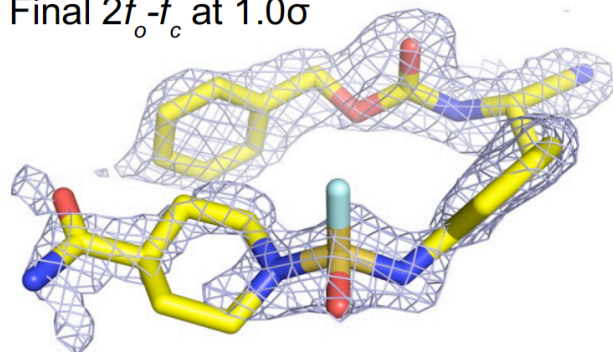

Electrostatic potential surface of compound 5 and SpeB complex

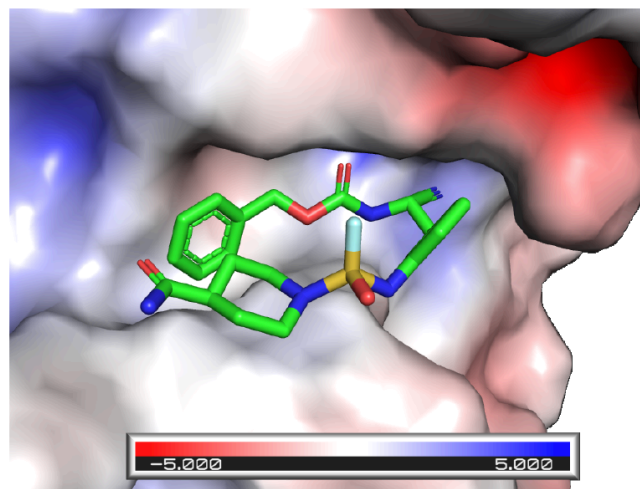

**Figure S9.** X-ray structure of compound 5-SpeB complex.

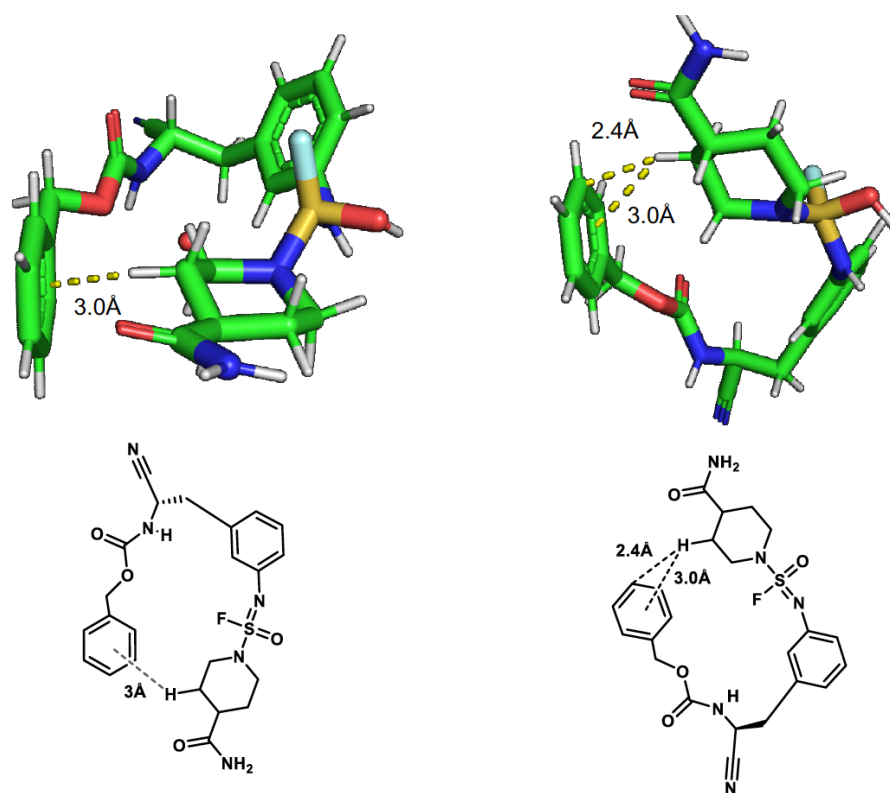

**Figure S10.** Intramolecular CH- $\pi$  interaction between piperidine and benzyl moiety of compound **5** bound to SpeB.

## References

1. Li, S.; Wu, P.; Moses, J. E.; Sharpless, K. B., Multidimensional SuFEx click chemistry: Sequential sulfur(VI) fluoride exchange connections of diverse modules launched from an SOF<sub>4</sub> hub. *Angew. Chem. Int. Ed.* **2017**, *56* (11), 2903-2908.
2. Wang, A. Y.; González-Páez, G. E.; Wolan, D. W., Identification and co-complex structure of a new *S. pyogenes* SpeB small molecule inhibitor. *Biochemistry* **2015**, *54* (28), 4365-4373.
3. González-Páez, G. E.; Wolan, D. W., Ultrahigh and high resolution structures and mutational analysis of monomeric *Streptococcus pyogenes* SpeB reveal a functional role for the glycine-rich C-terminal loop. *J. Biol. Chem.* **2012**, *287* (29), 24412-24426.
4. Bai, N.; Roder, H.; Dickson, A.; Karanicolas, J., Isothermal analysis of thermofluor data can readily provide quantitative binding affinities. *Sci. Rep.* **2019**, *9* (1), 2650.
5. Aziz, R. K.; Pabst, M. J.; Jeng, A.; Kansal, R.; Low, D. E.; Nizet, V.; Kotb, M., Invasive M1T1 group A *Streptococcus* undergoes a phase-shift *in vivo* to prevent proteolytic degradation of multiple virulence factors by SpeB. *Mol. Microbiol.* **2004**, *51* (1), 123-134.
6. Ulloa, E. R.; Dillon, N.; Tsunemoto, H.; Pogliano, J.; Sakoulas, G.; Nizet, V., Avibactam sensitizes carbapenem-resistant NDM-1-producing *Klebsiella pneumoniae* to innate immune clearance. *J. Infect. Dis.* **2019**, *220* (3), 484-493.
7. Otwinowski, Z.; Minor, W., *et al.*, Processing of X-ray diffraction data collected in oscillation mode. In *Methods Enzymol.*, Academic Press: 1997; Vol. 276, pp 307-326.
8. McCoy, A. J.; Grosse-Kunstleve, R. W.; Adams, P. D.; Winn, M. D.; Storoni, L. C.; Read, R. J., Phaser crystallographic software. *J. Appl. Crystallogr.* **2007**, *40* (4), 658-674.
9. Emsley, P.; Lohkamp, B.; Scott, W. G.; Cowtan, K., Features and development of Coot. *Acta Crystallogr.* **2010**, *D66* (4), 486-501.
10. Adams, P. D.; Afonine, P. V.; Bunkoczi, G.; Chen, V. B.; Davis, I. W.; Echols, N.; Headd, J. J.; Hung, L.-W.; Kapral, G. J.; Grosse-Kunstleve, R. W.; McCoy, A. J.; Moriarty, N. W.; Oeffner, R.; Read, R. J.; Richardson, D. C.; Richardson, J. S.; Terwilliger, T. C.; Zwart, P. H., PHENIX: a comprehensive Python-based system for macromolecular structure solution. *Acta Crystallogr.* **2010**, *D66* (2), 213-221.
11. Kitamura, S.; Owensby, A.; Wall, D.; Wolan, D. W., Lipoprotein signal peptidase inhibitors with antibiotic properties identified through design of a robust *in vitro* HT platform. *Cell Chem. Biol.* **2017**, *25* (3), 301-308.e12.
12. Morisseau, C.; Goodrow, M. H.; Newman, J. W.; Wheelock, C. E.; Dowdy, D. L.; Hammock, B. D., Structural refinement of inhibitors of urea-based soluble epoxide hydrolases. *Biochem. Pharmacol.* **2002**, *63* (9), 1599-1608.
13. Kitamura, S.; Hvorecny, K. L.; Niu, J.; Hammock, B. D.; Madden, D. R.; Morisseau, C., Rational design of potent and selective inhibitors of an epoxide hydrolase virulence factor from *Pseudomonas aeruginosa*. *J. Med. Chem.* **2016**, *59* (10), 4790-4799.



NMR spectra of compound **5**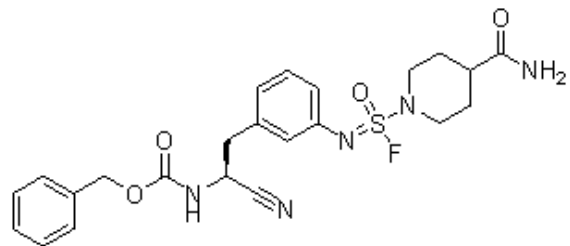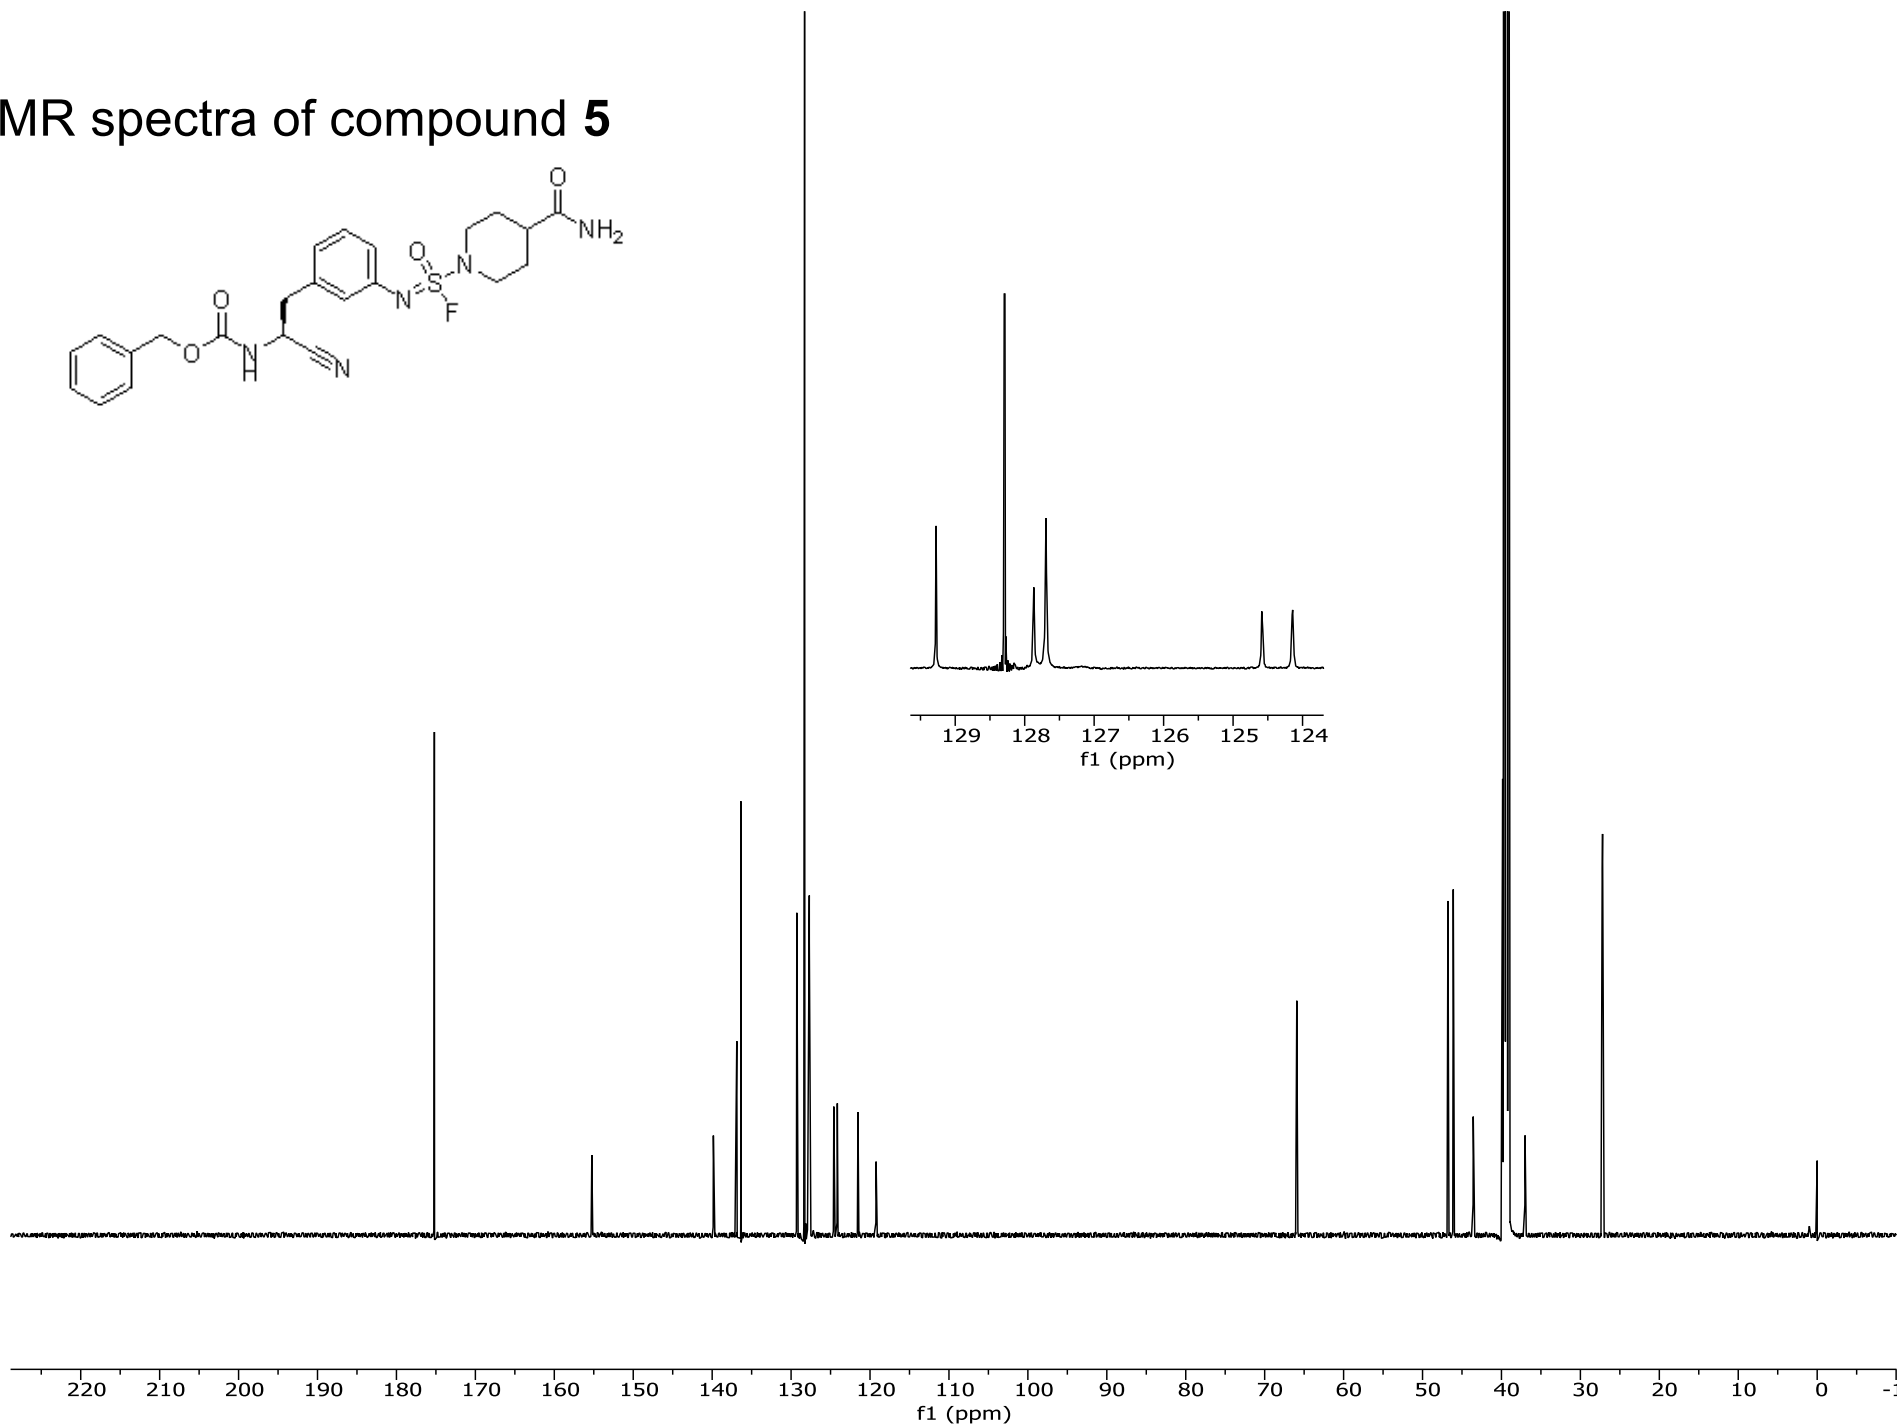

# NMR spectra of compound **5**

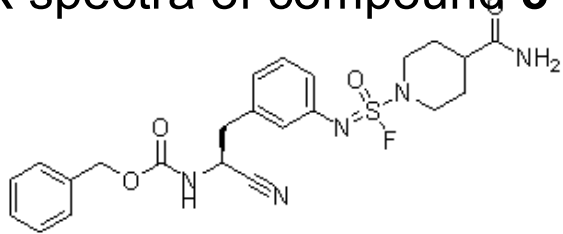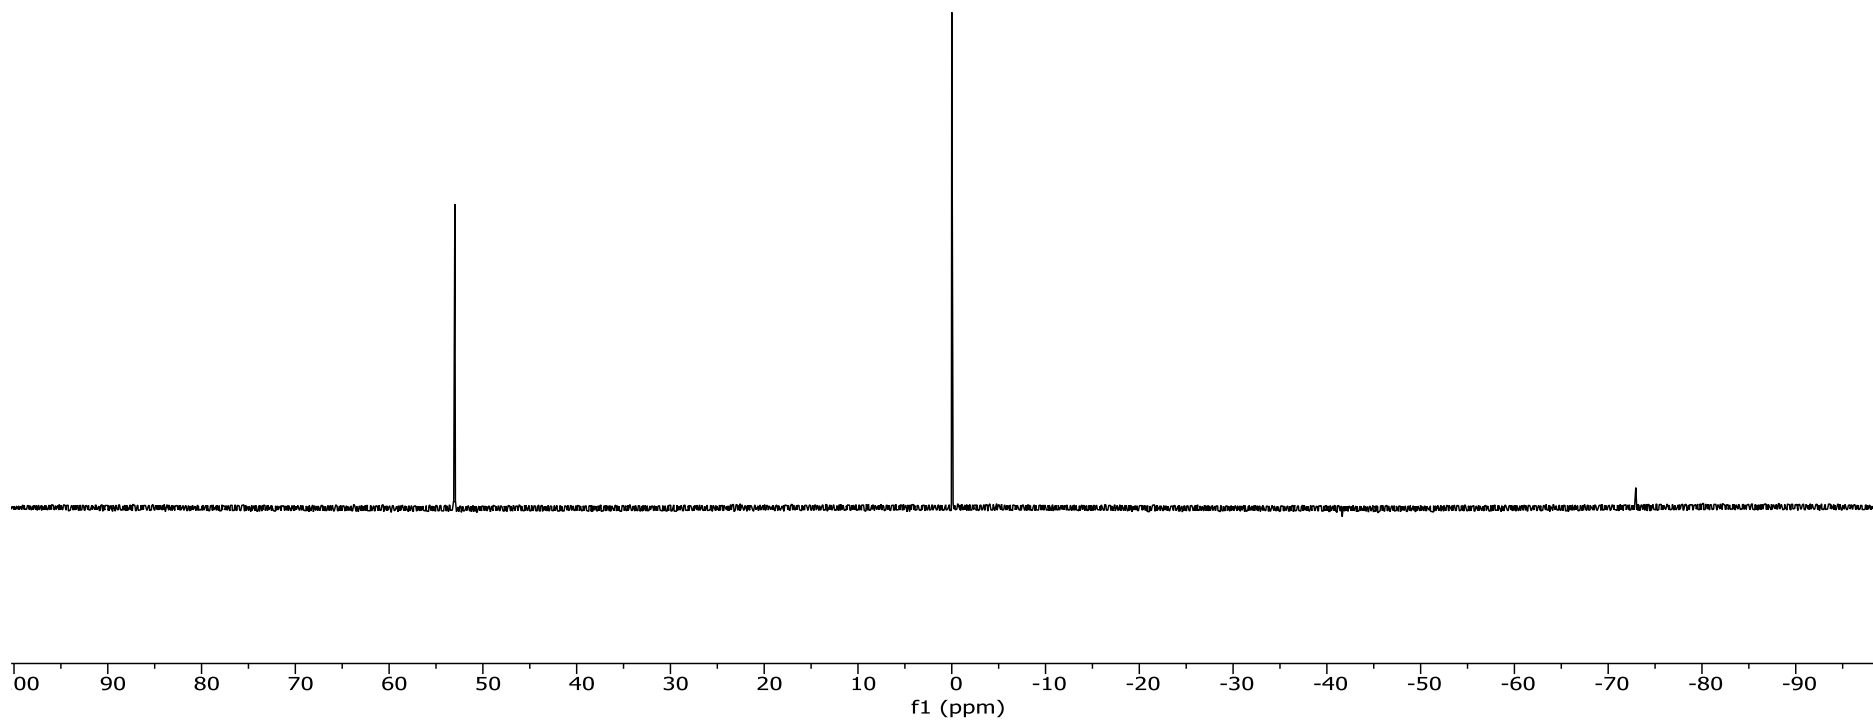

# NMR spectra of compound 6

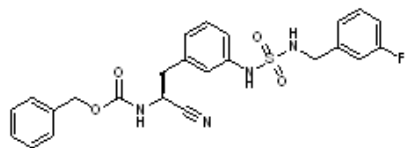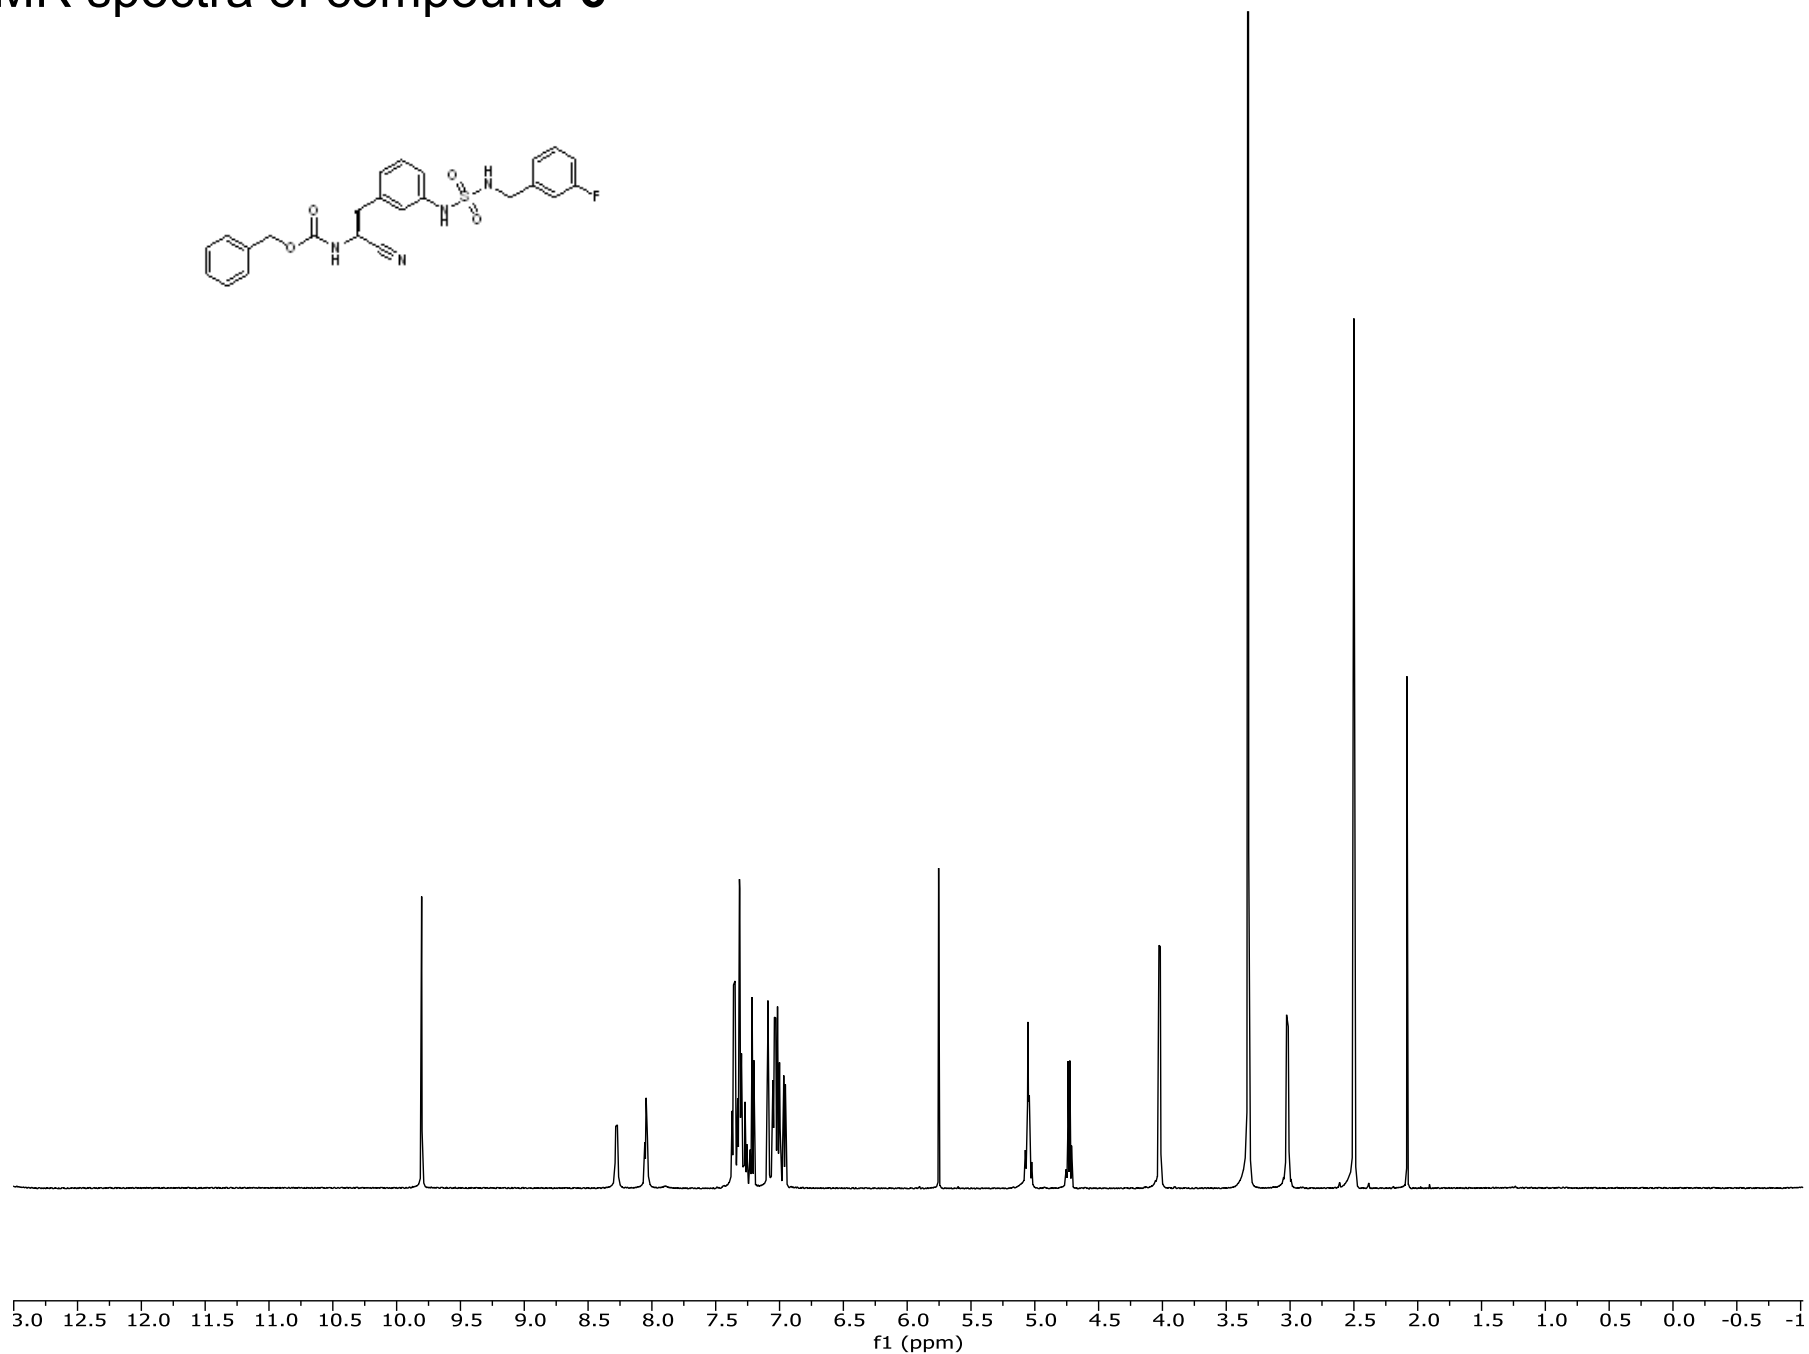

# NMR spectra of compound 6

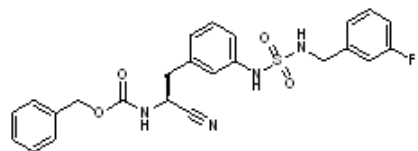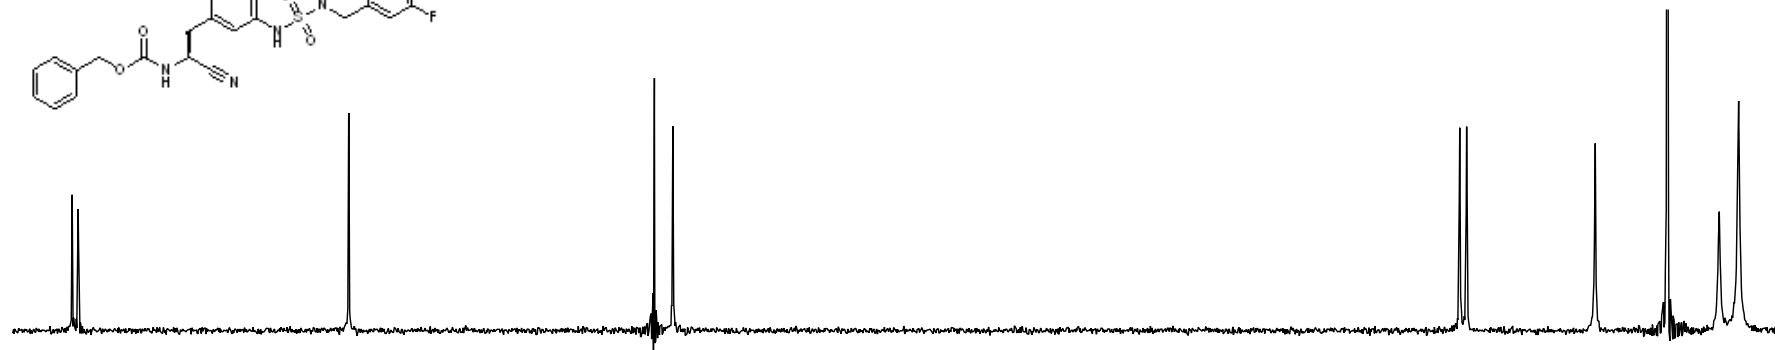

141.5 141.0 140.5 140.0 139.5 139.0 138.5 138.0 137.5 137.0 136.5 136.0 135.5 135.0 134.5 134.0 133.5 133.0 132.5 132.0 131.5 131.0 130.5 130.0 129.5 129.0 128.5 128.0 127.5  
f1 (ppm)

skita60020191031-1.2.fid —

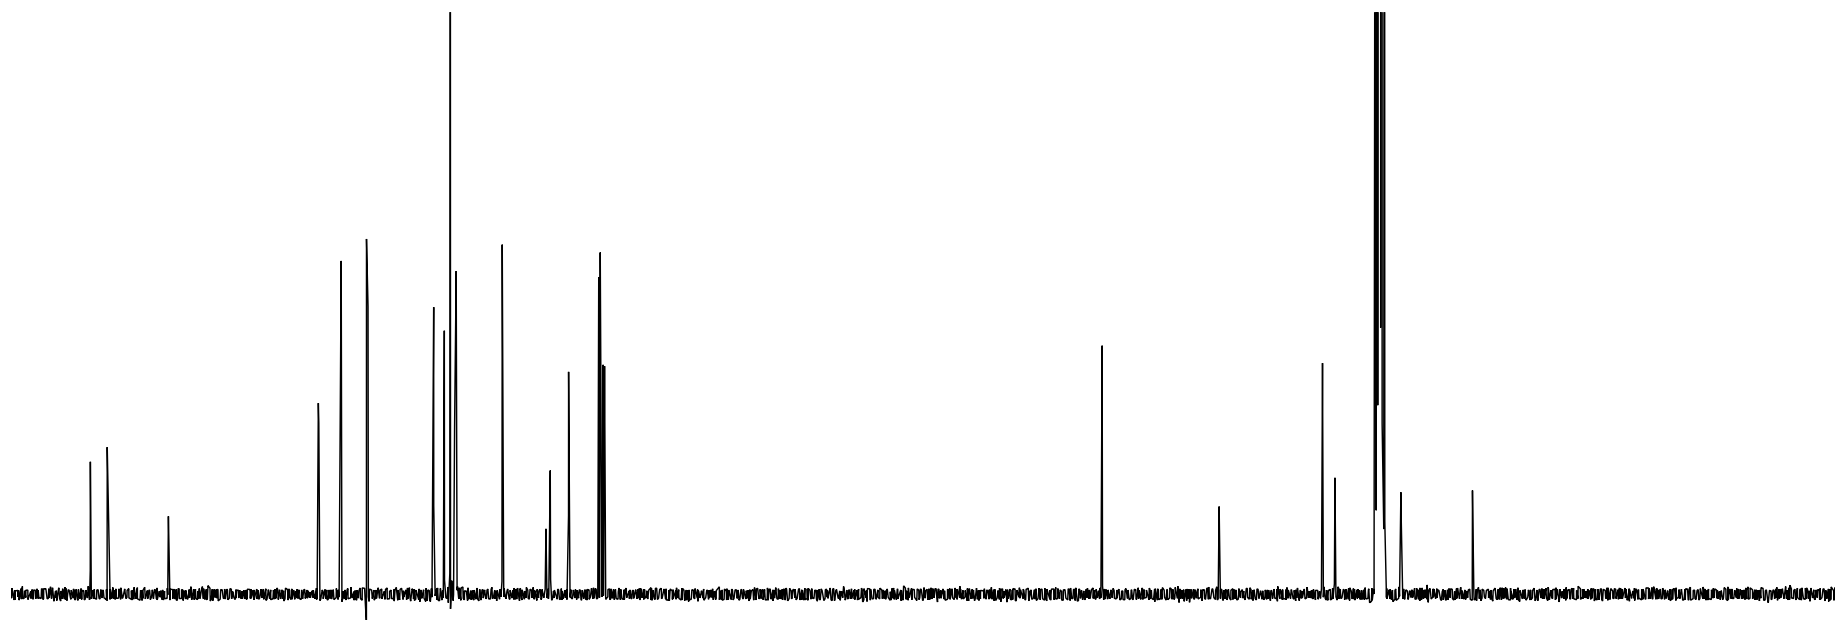

70 160 150 140 130 120 110 100 90 80 70 60 50 40 30 20 10 0  
f1 (ppm)

# NMR spectra of compound 7

skita60020191027-1.1.fid —

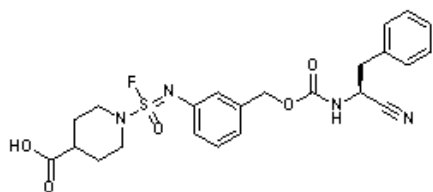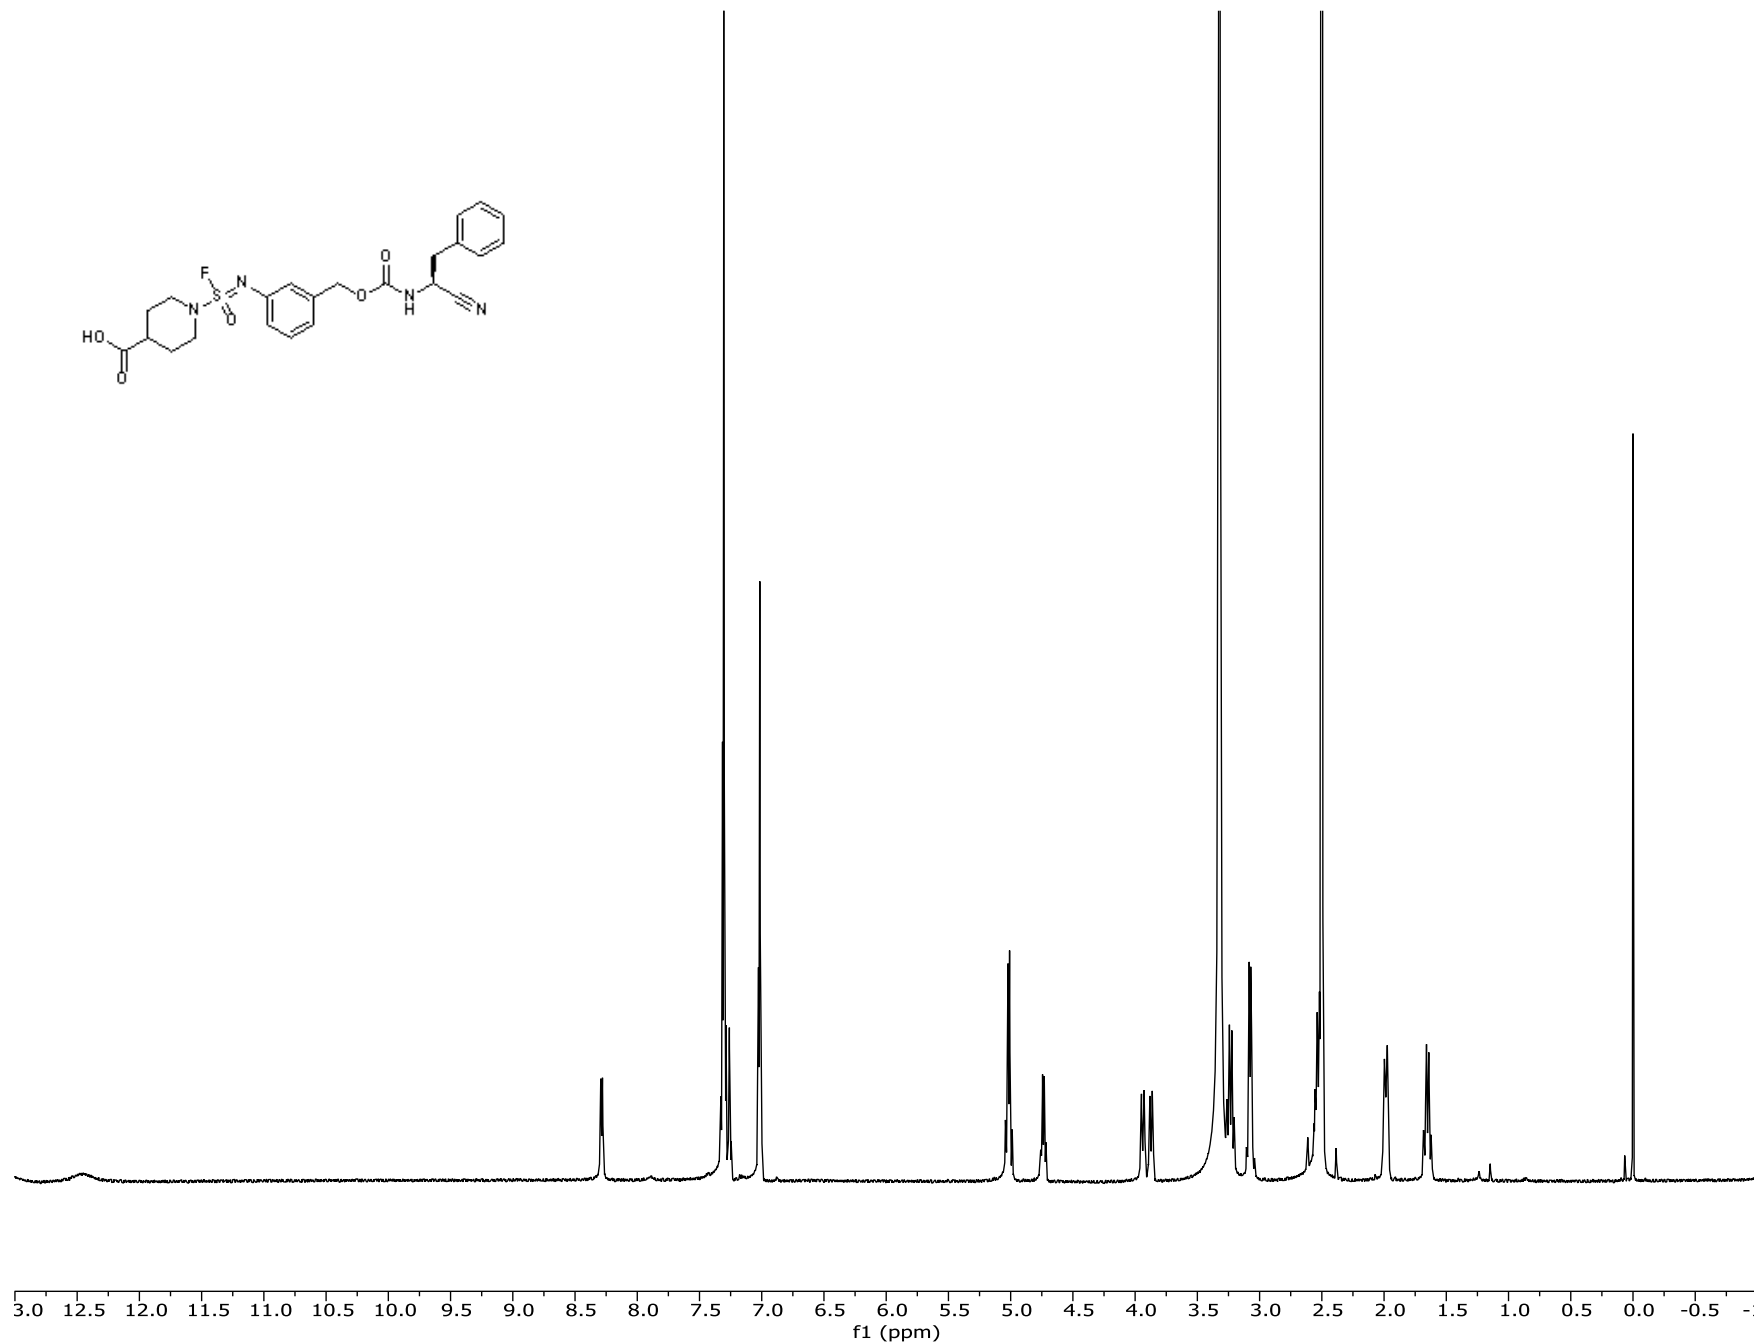

# NMR spectra of compound 7

skita60020191027-1.2.fid

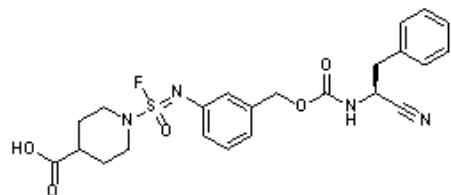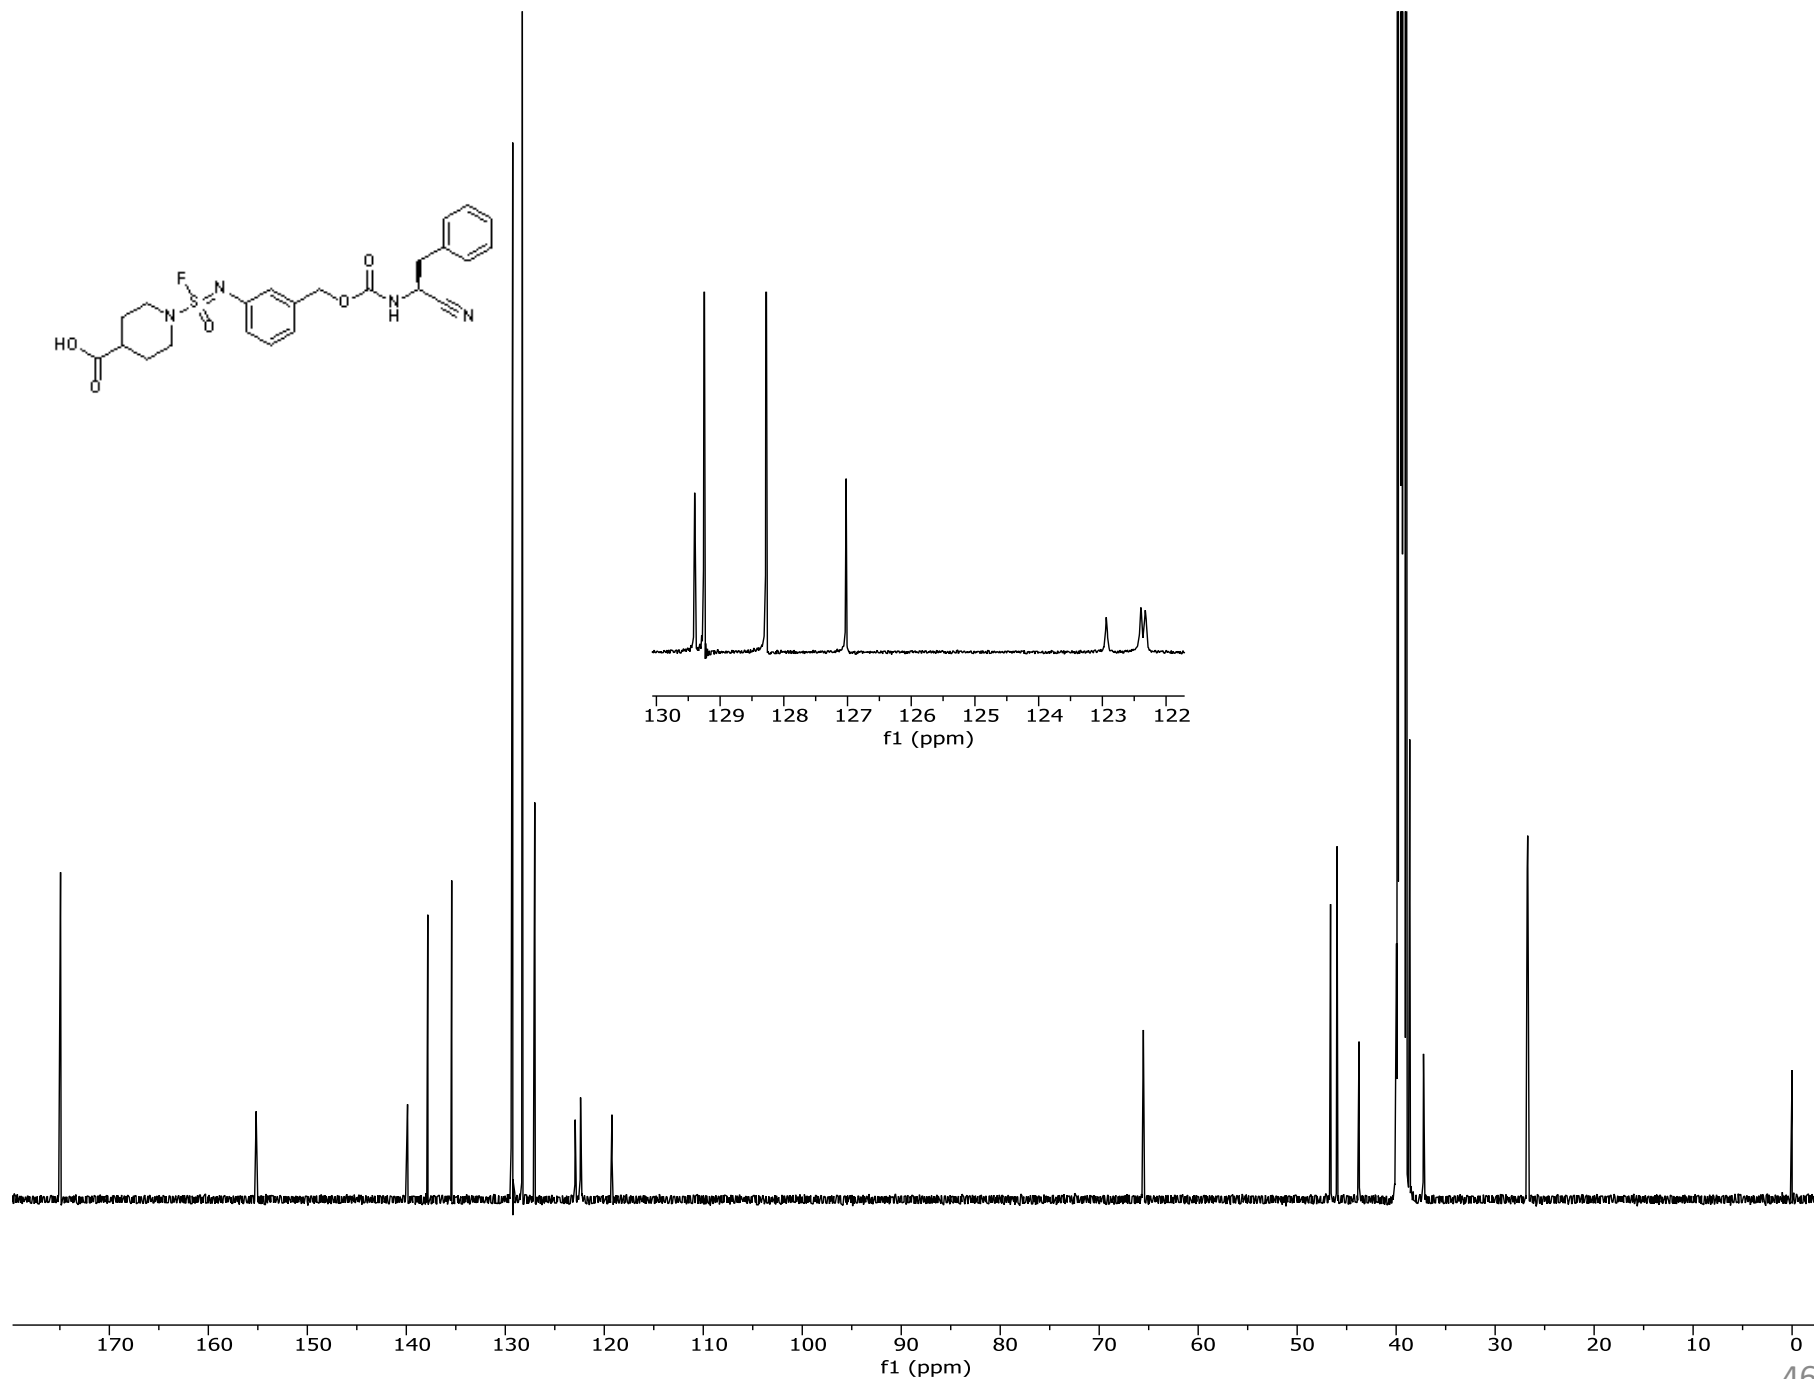

skita60020191106.1.fid

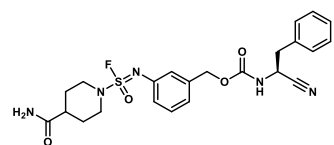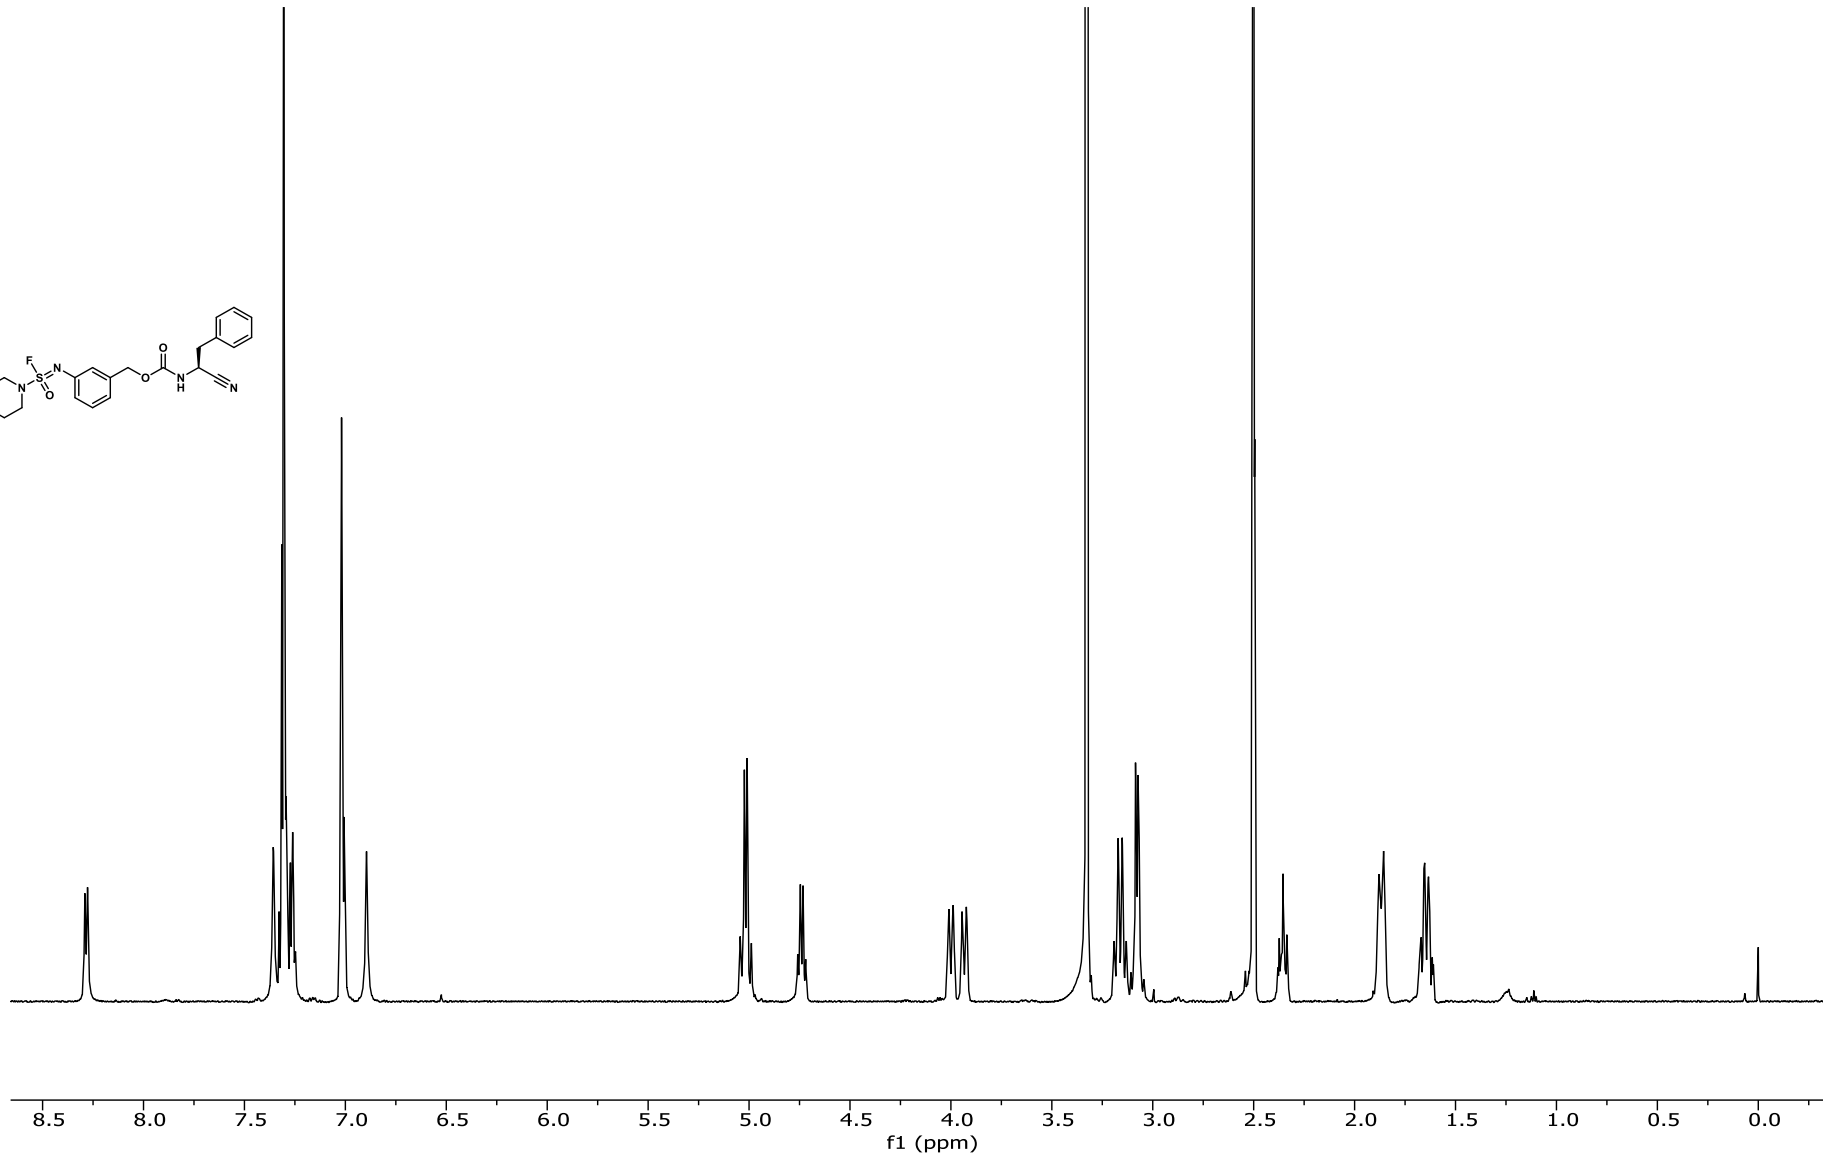

skita60020191106.2.fid —

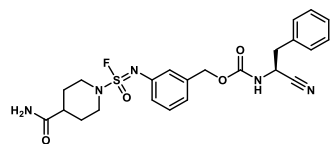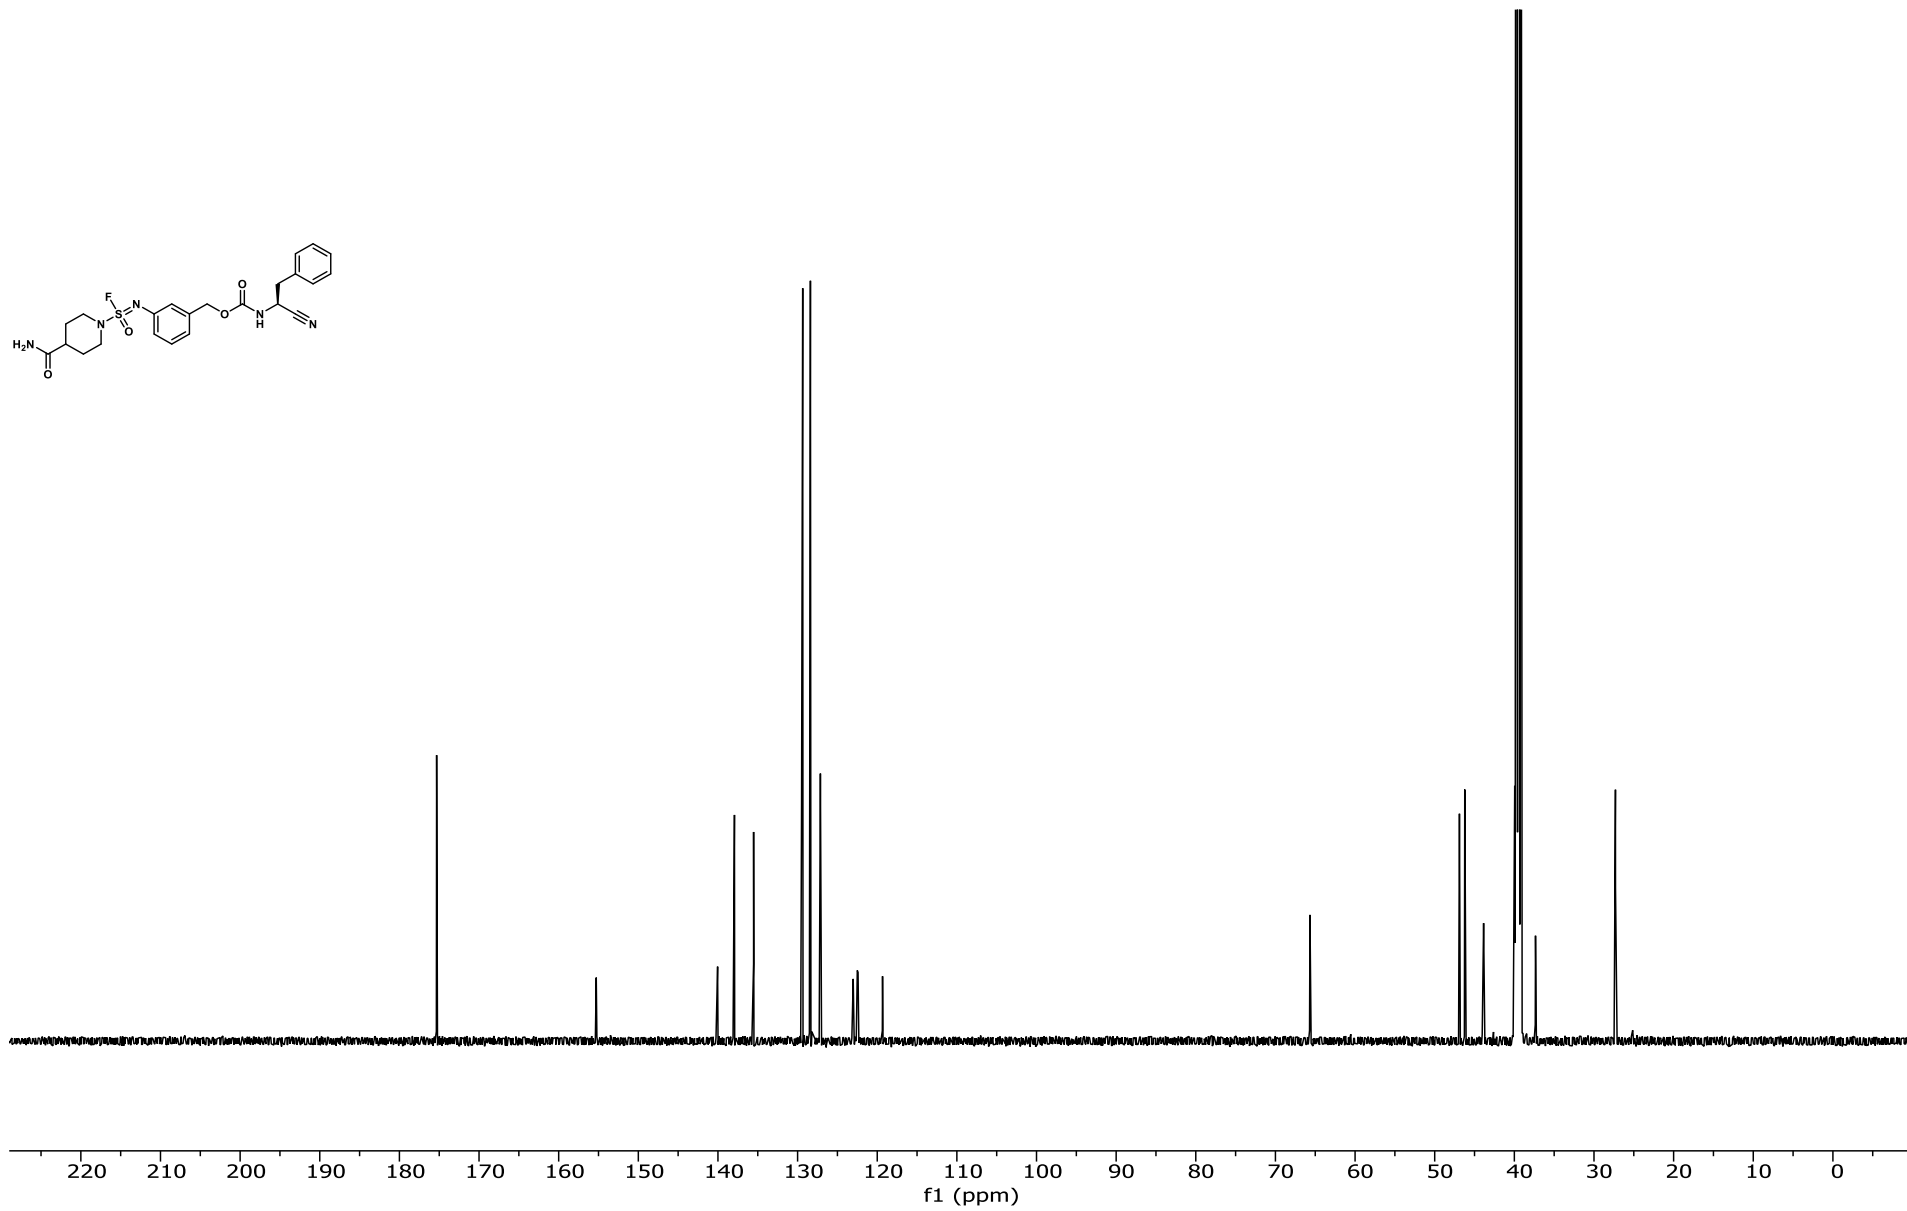



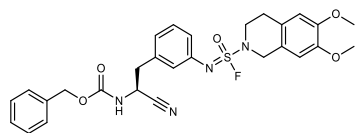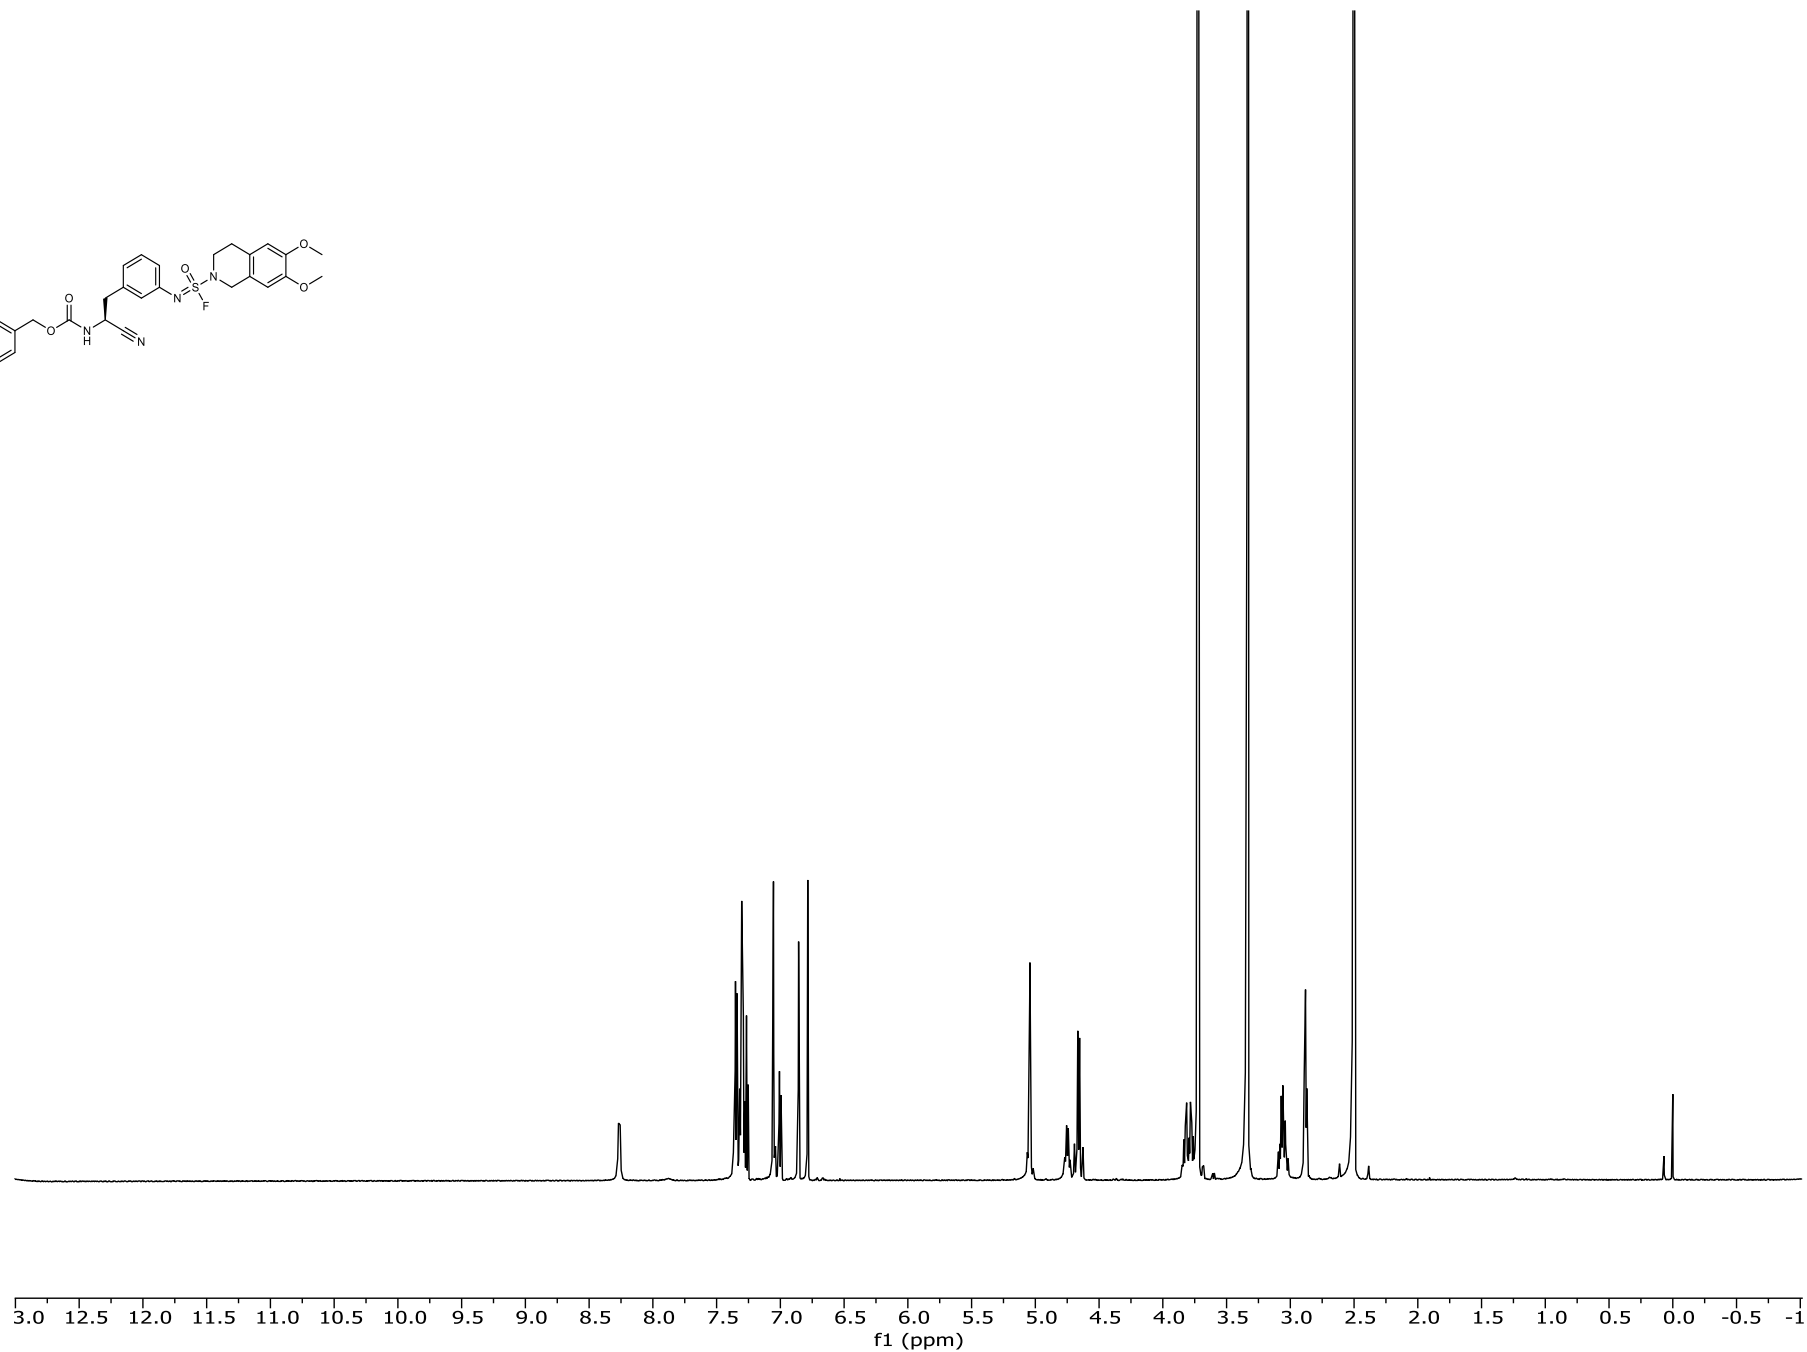

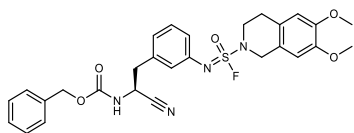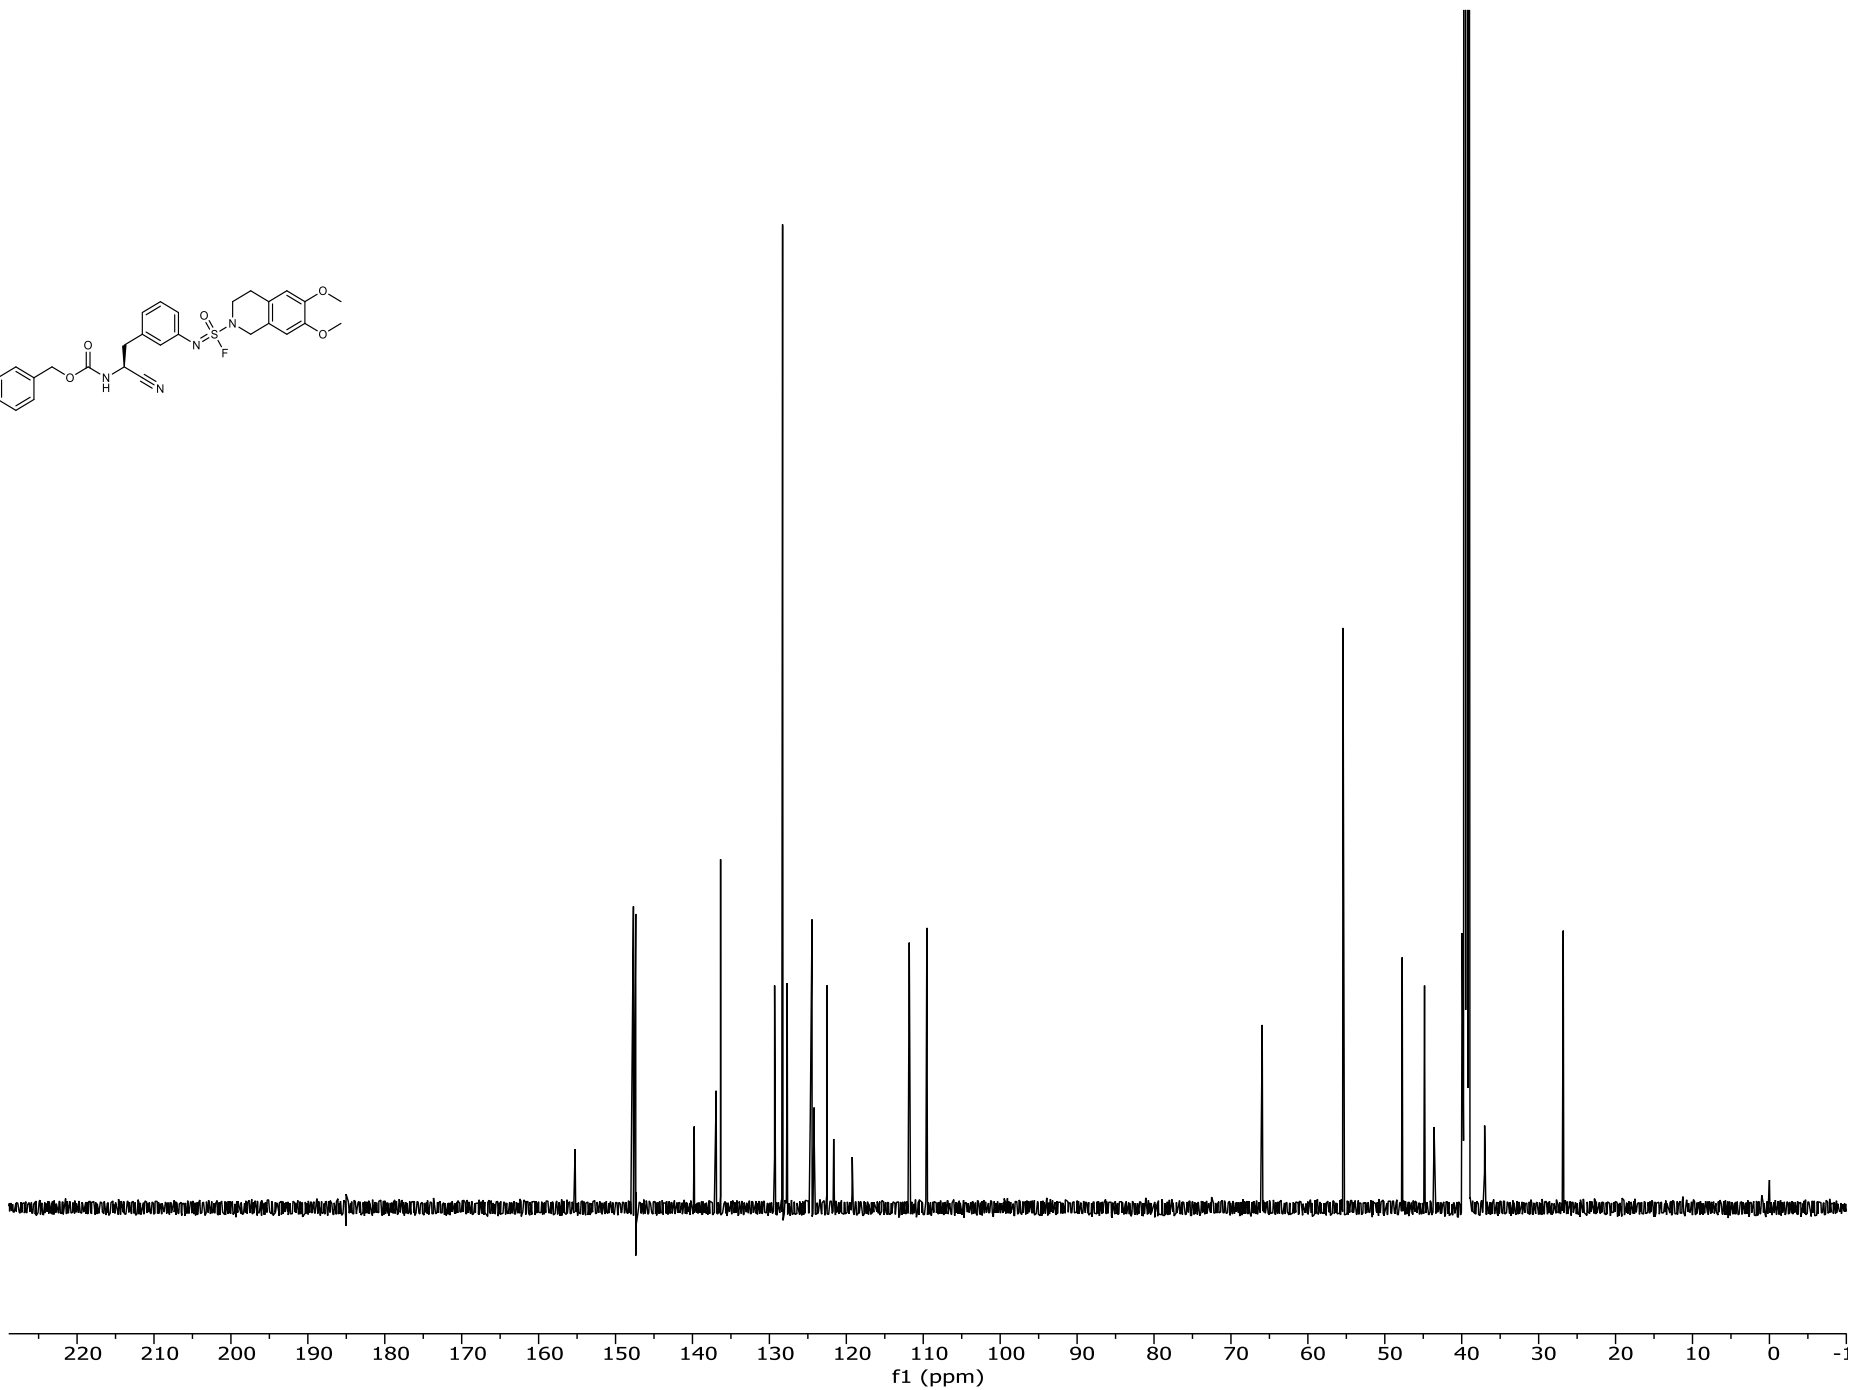

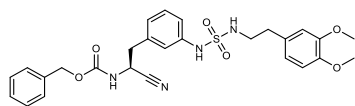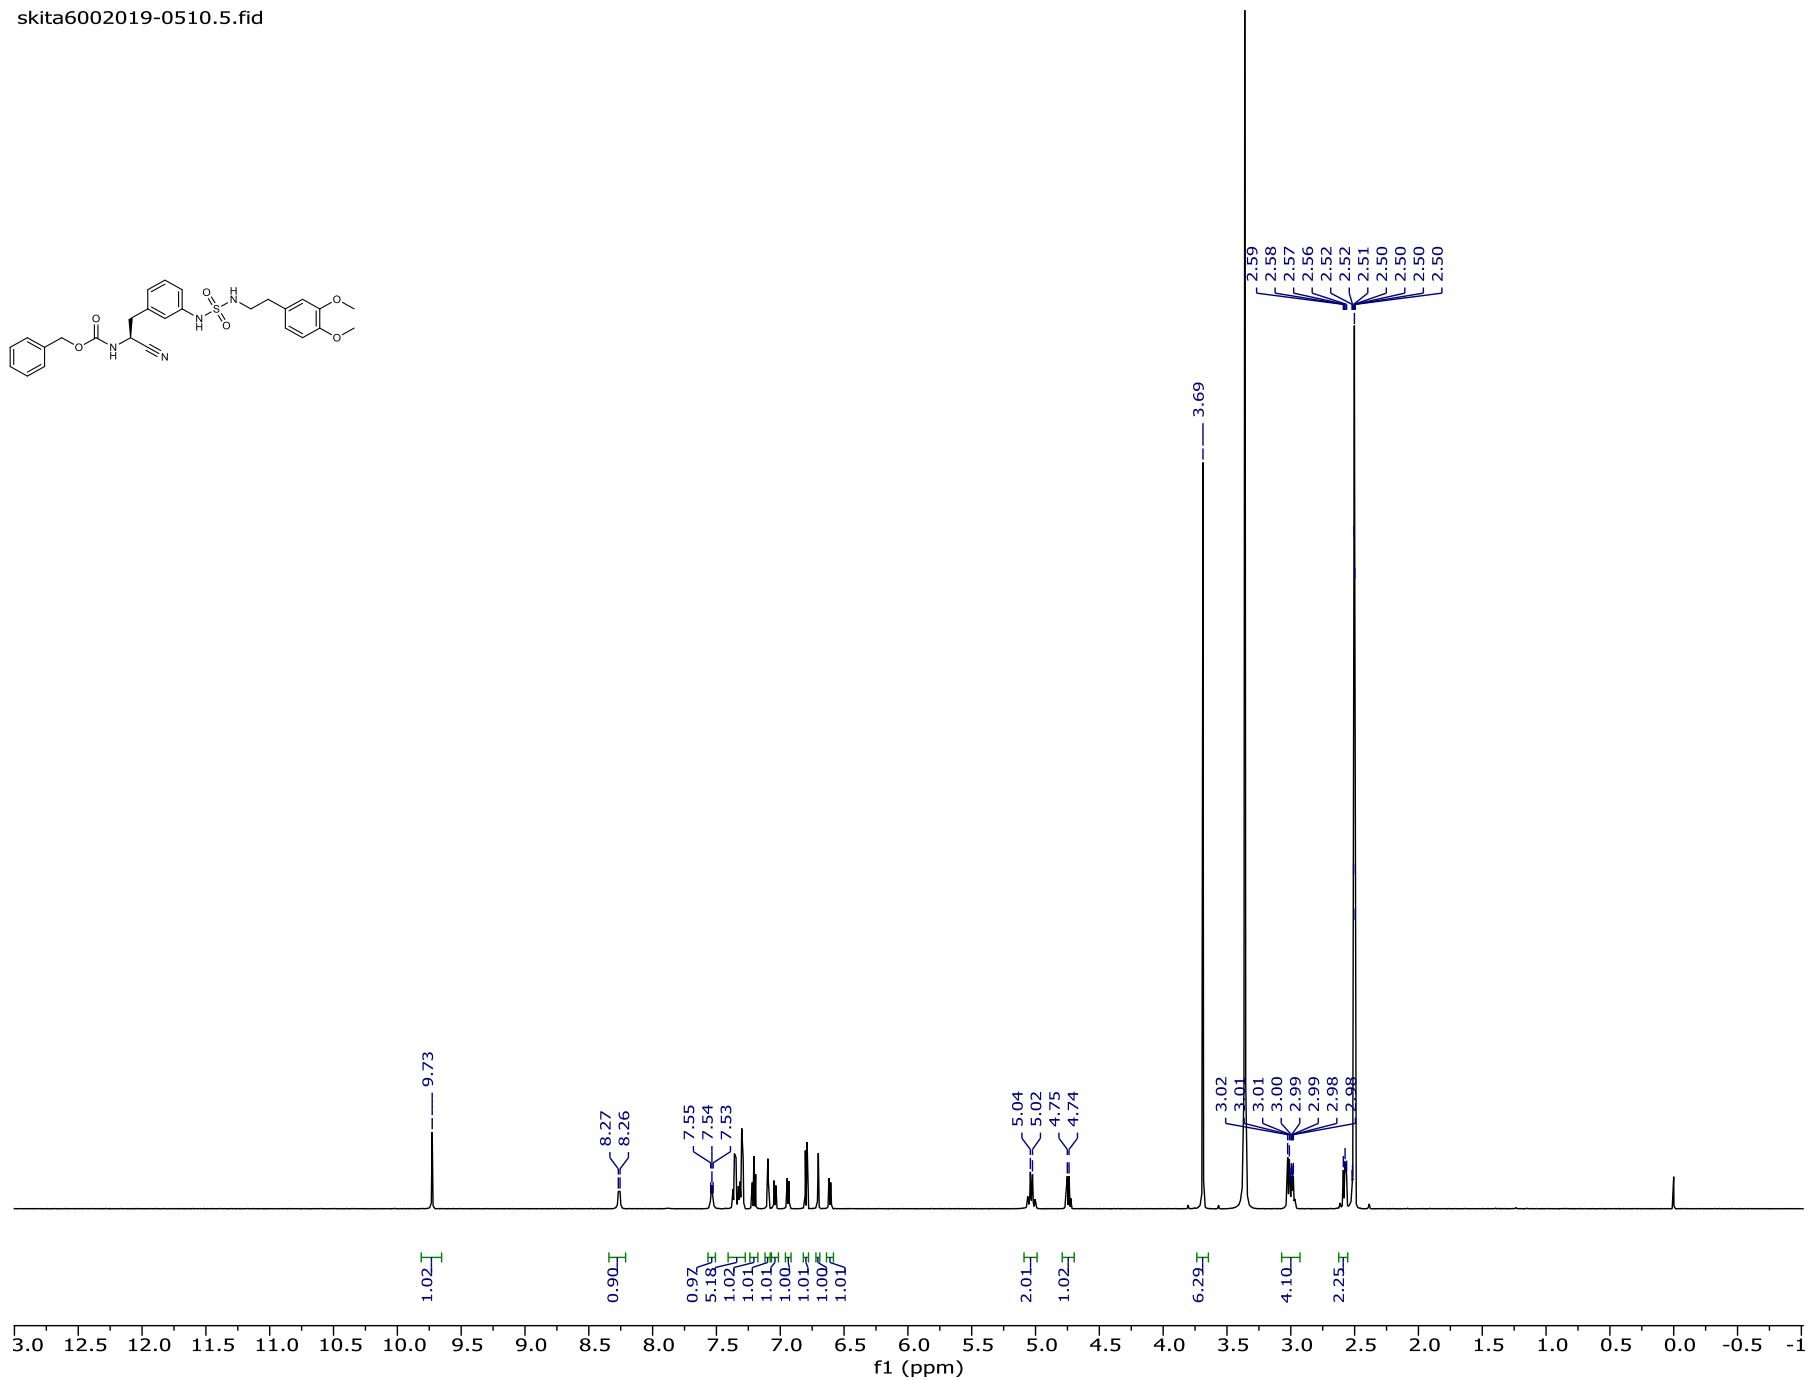

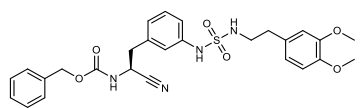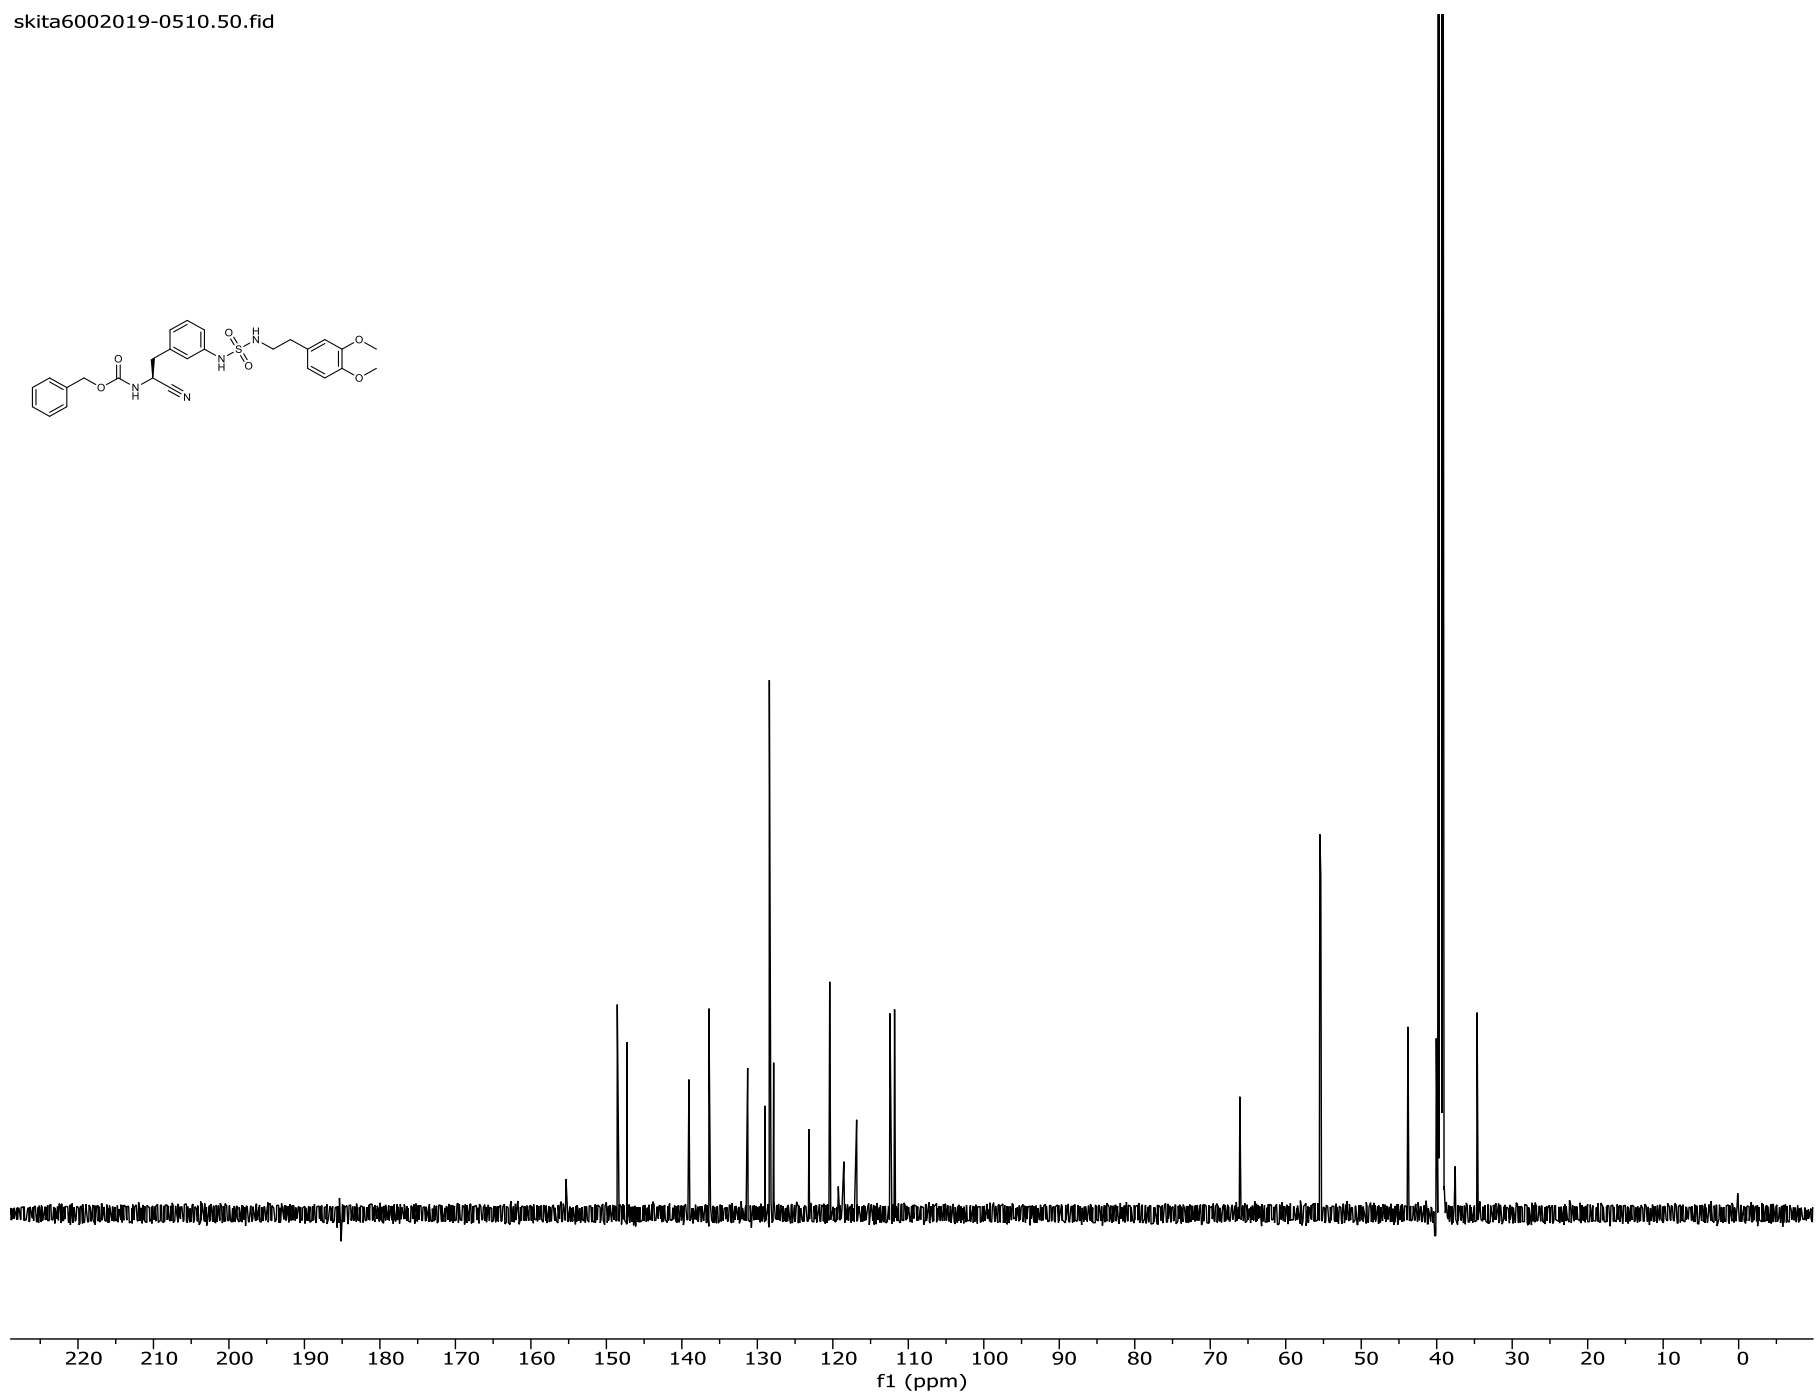

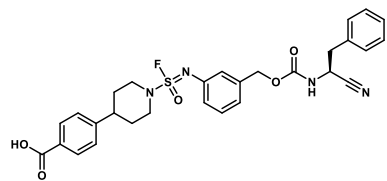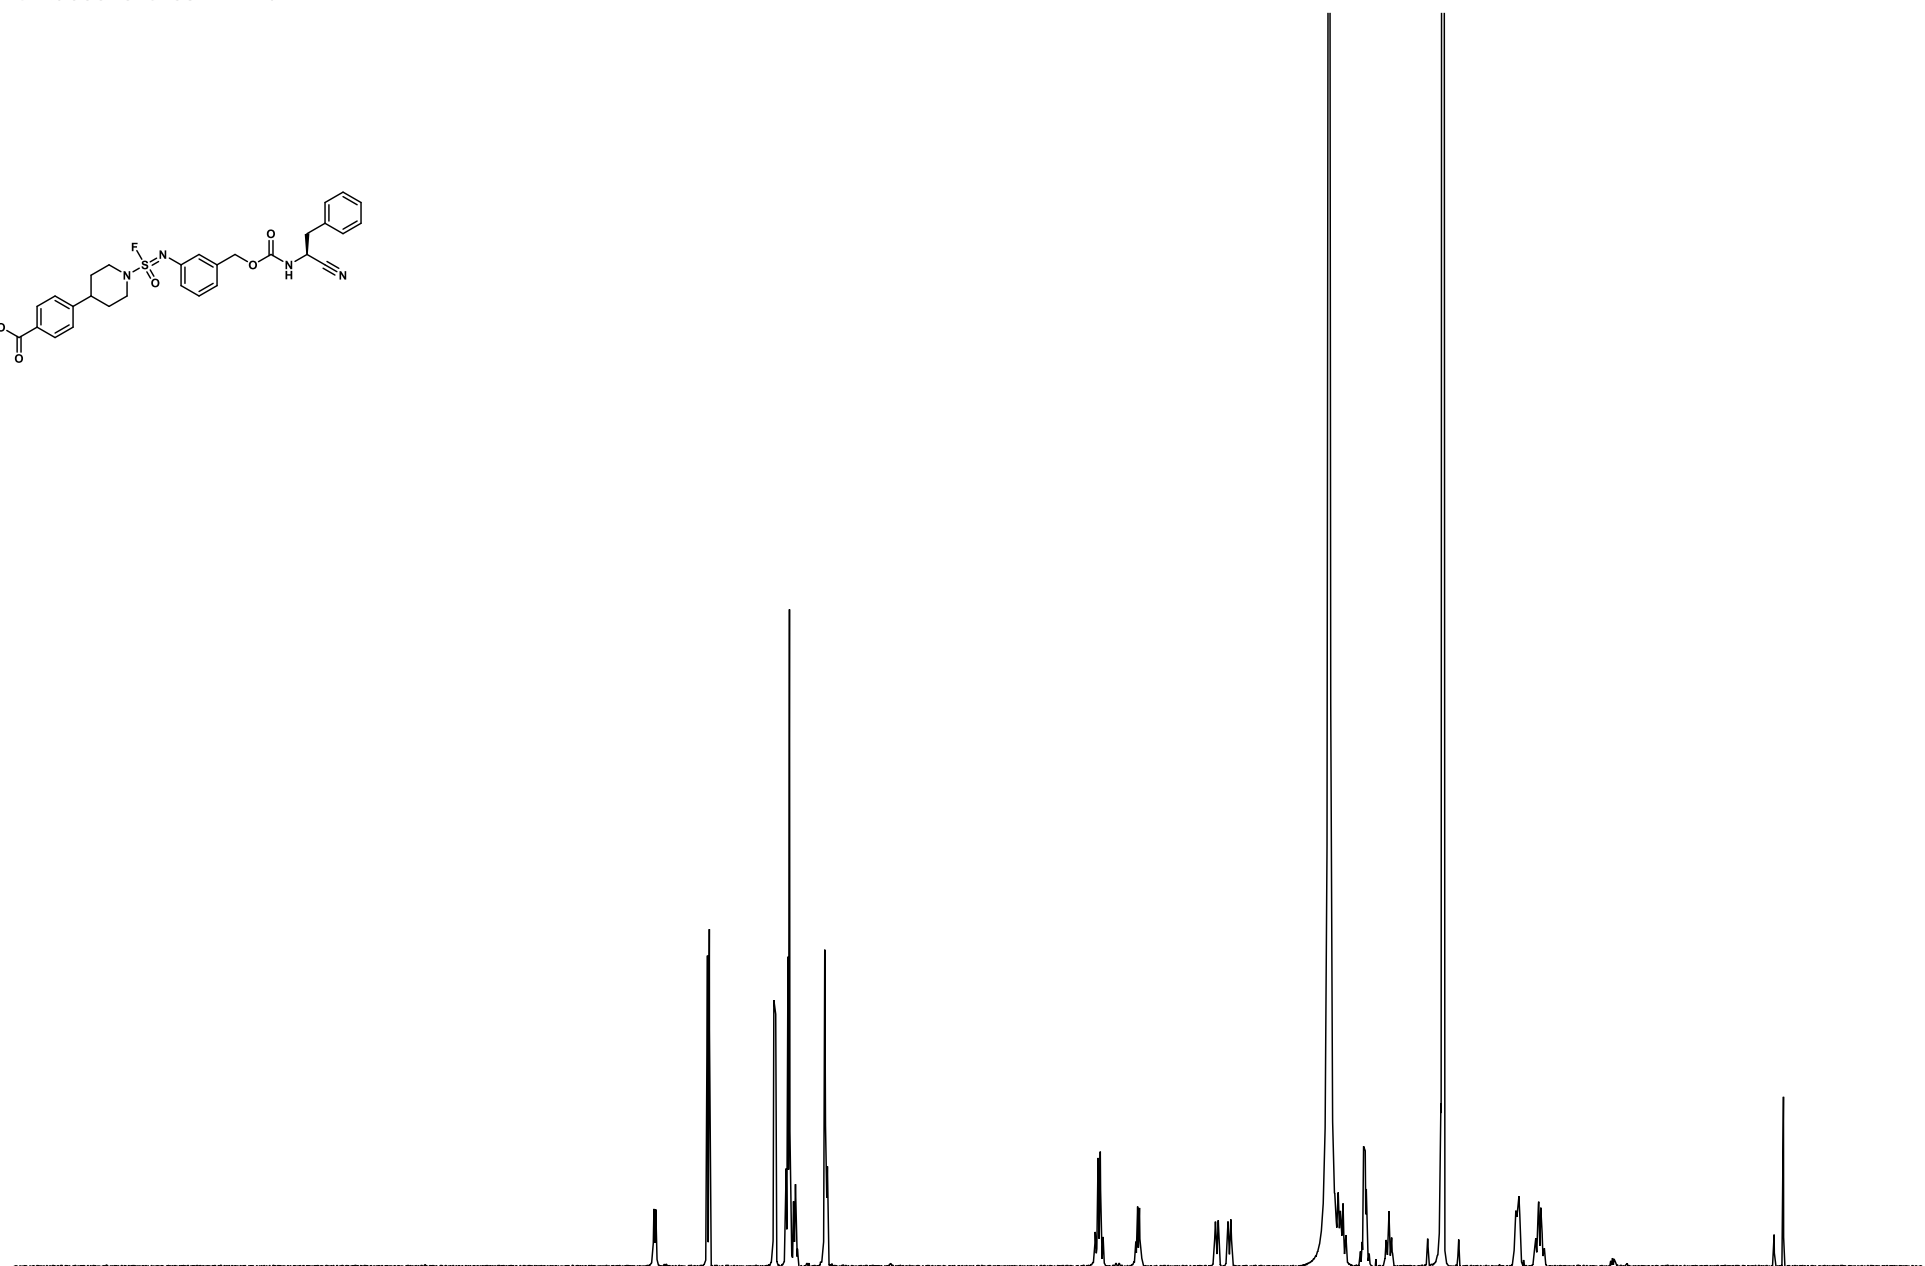

3.0 12.5 12.0 11.5 11.0 10.5 10.0 9.5 9.0 8.5 8.0 7.5 7.0 6.5 6.0 5.5 5.0 4.5 4.0 3.5 3.0 2.5 2.0 1.5 1.0 0.5 0.0 -0.5 -1

f1 (ppm)  
Kitamura et al. 2019 SI

— 52.3052 |

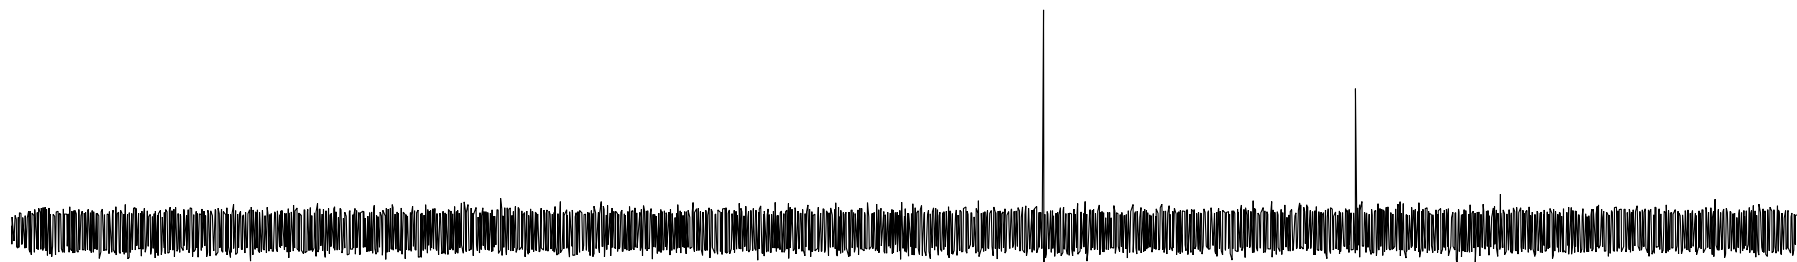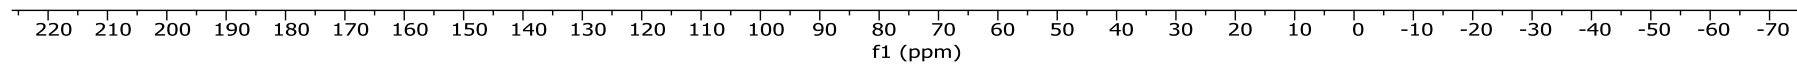

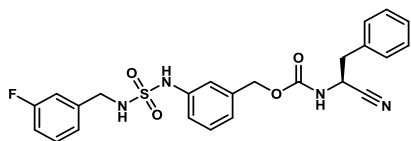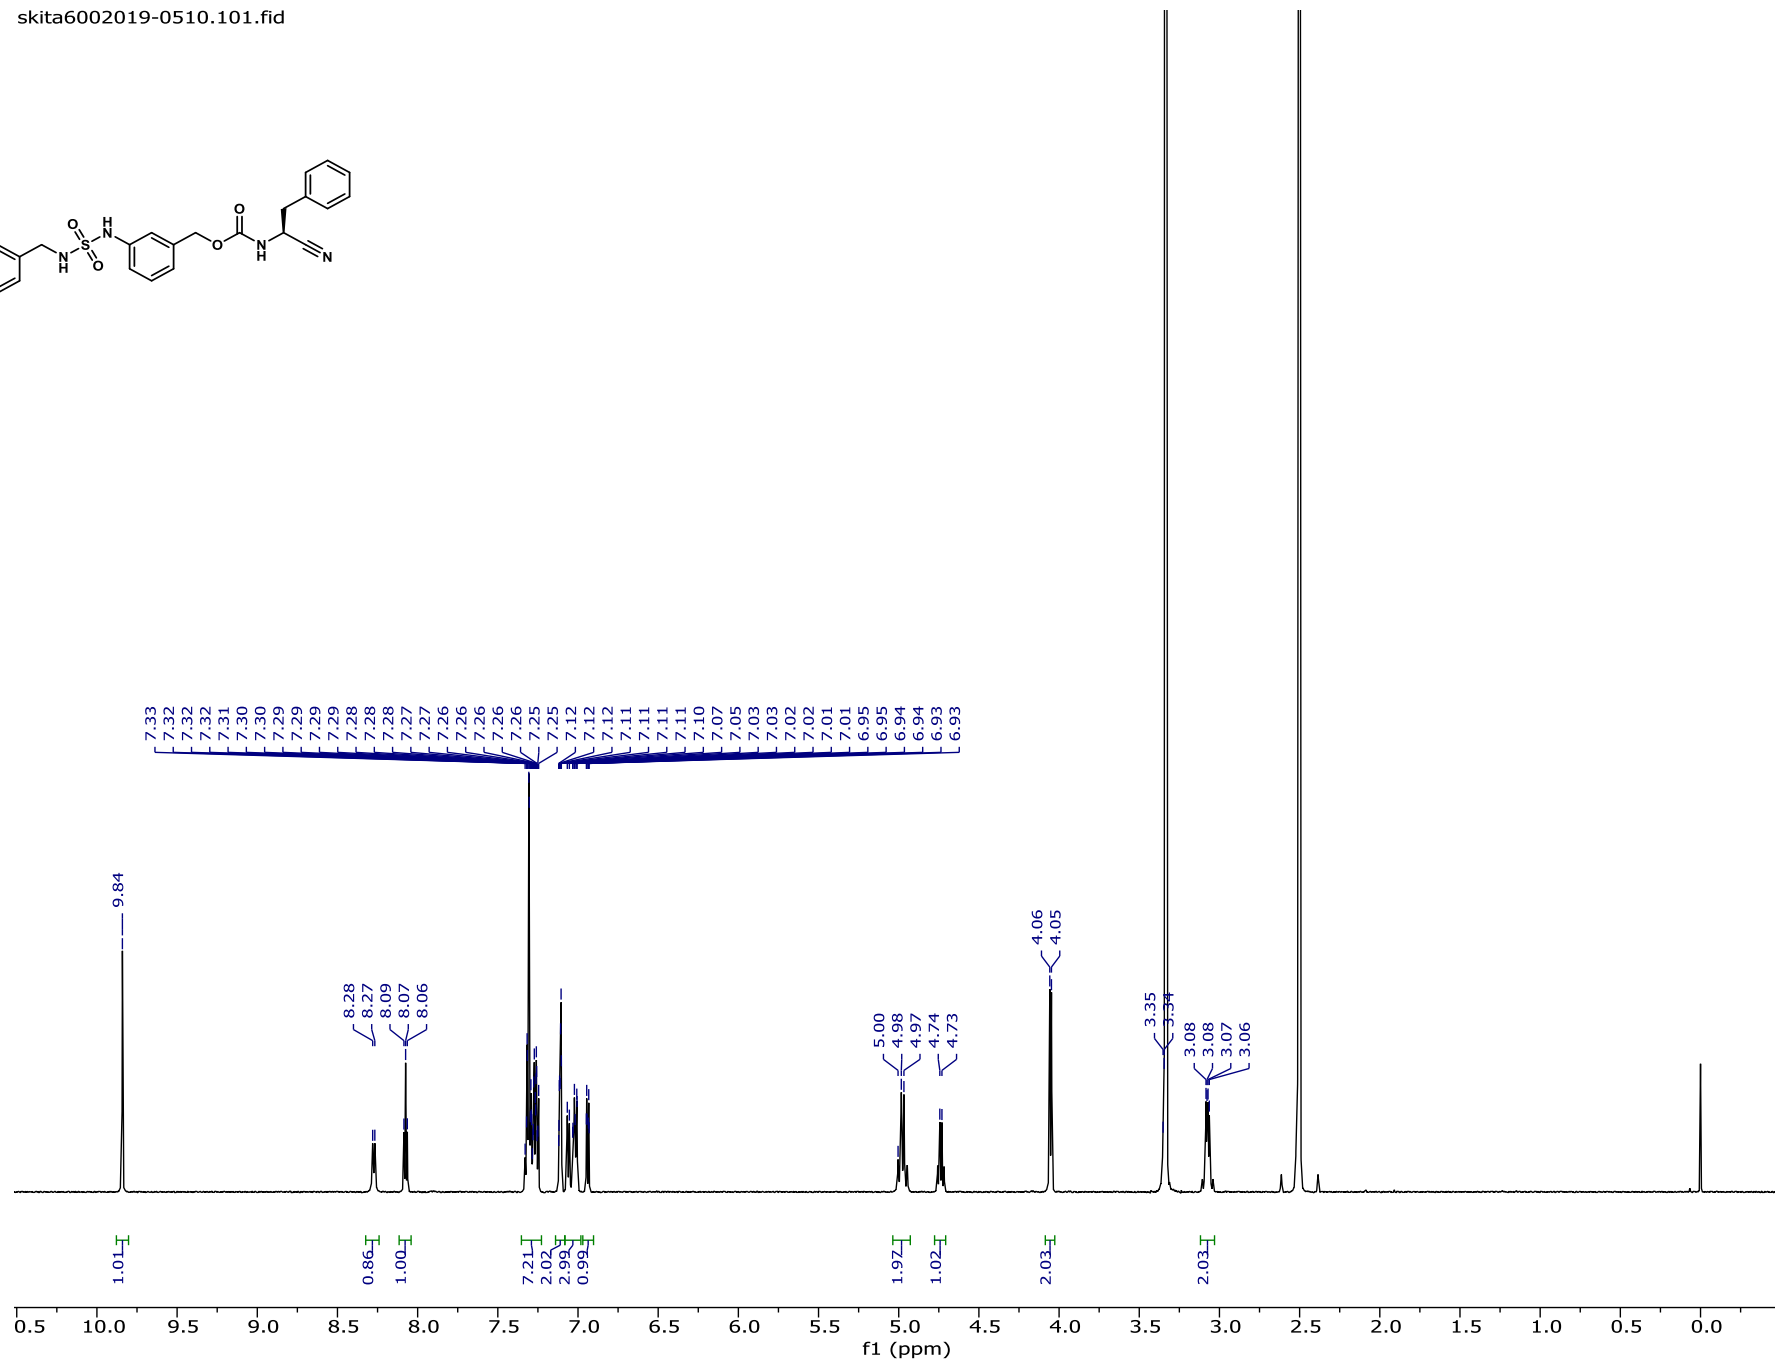

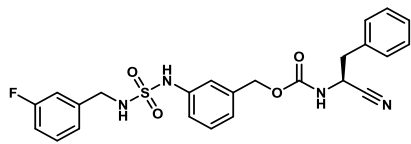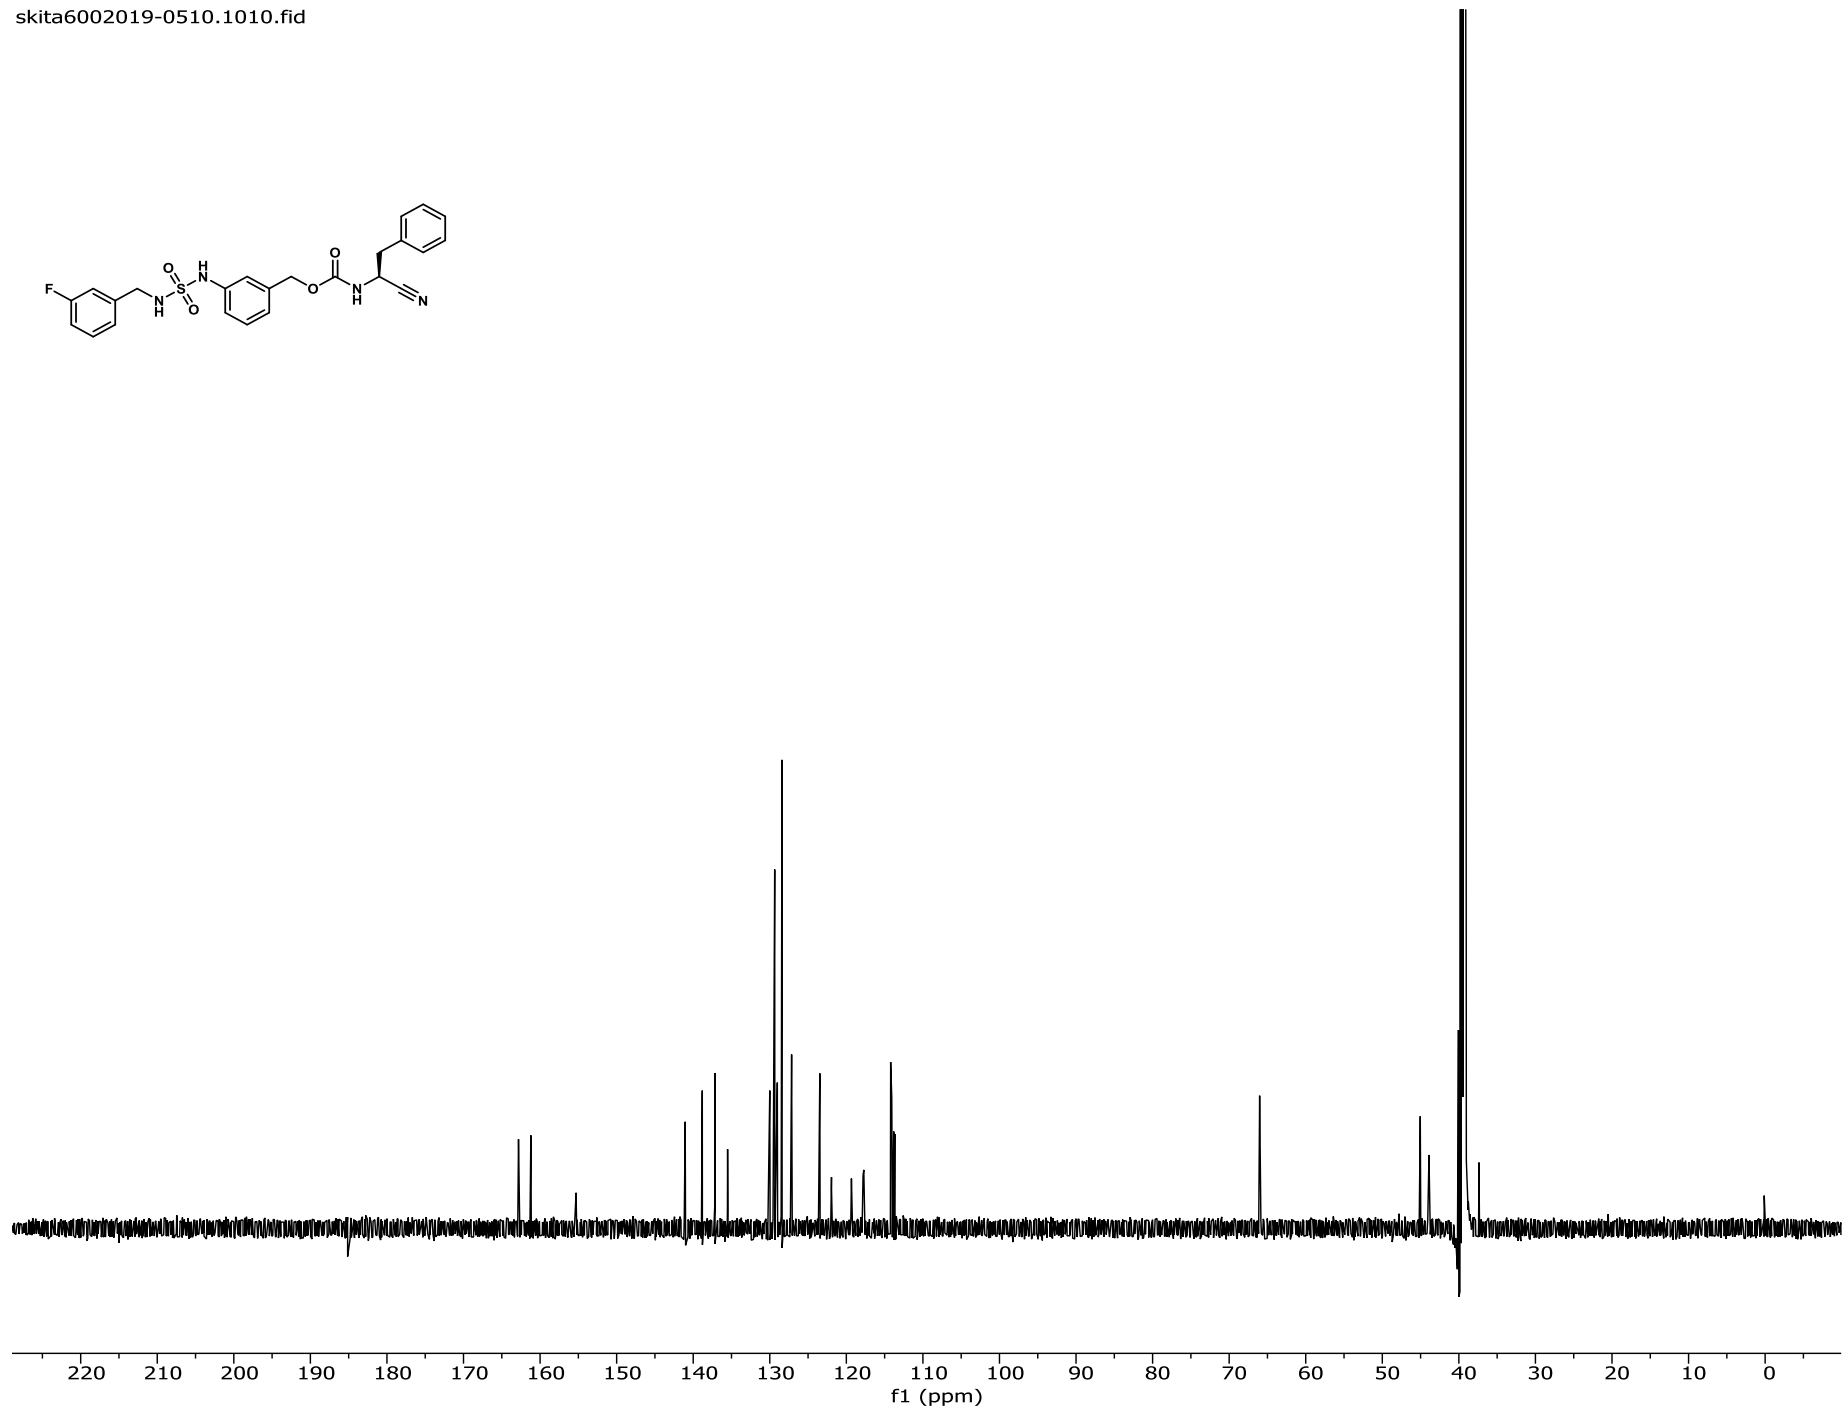



— -113.3936

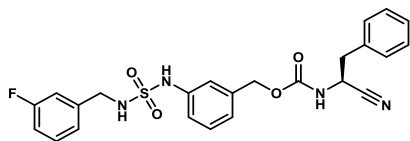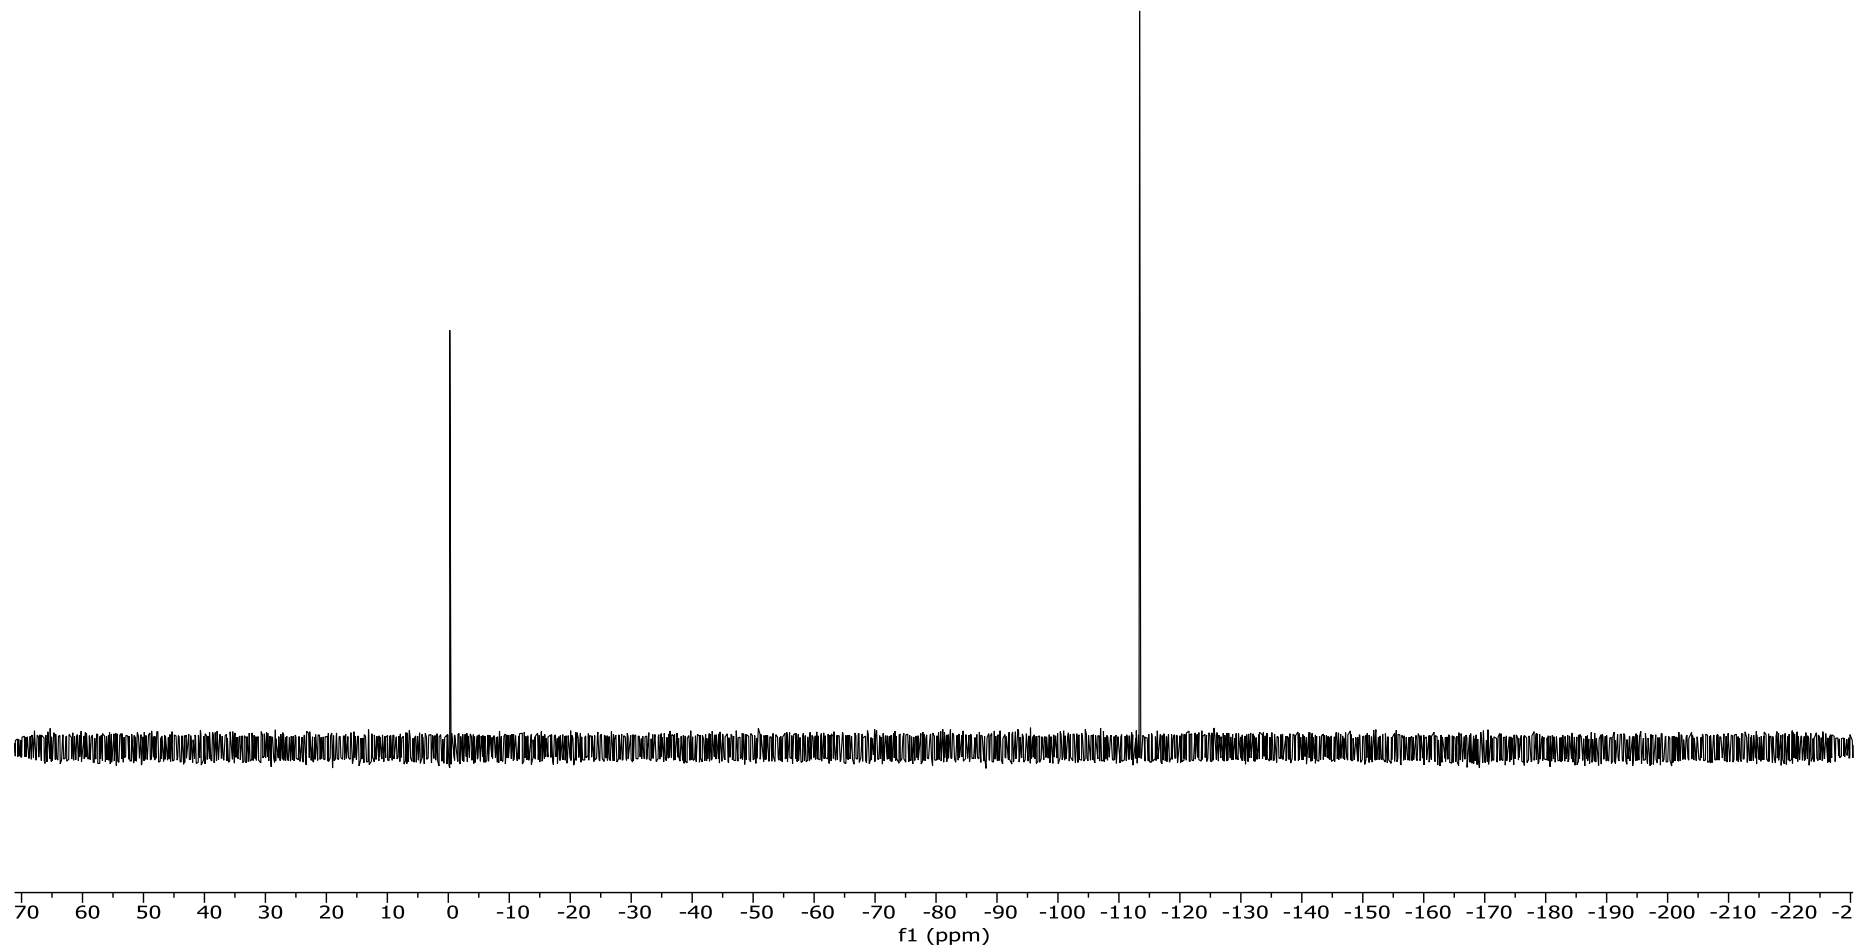

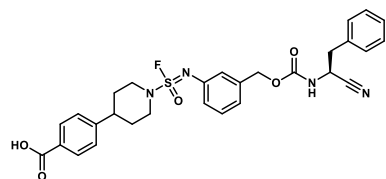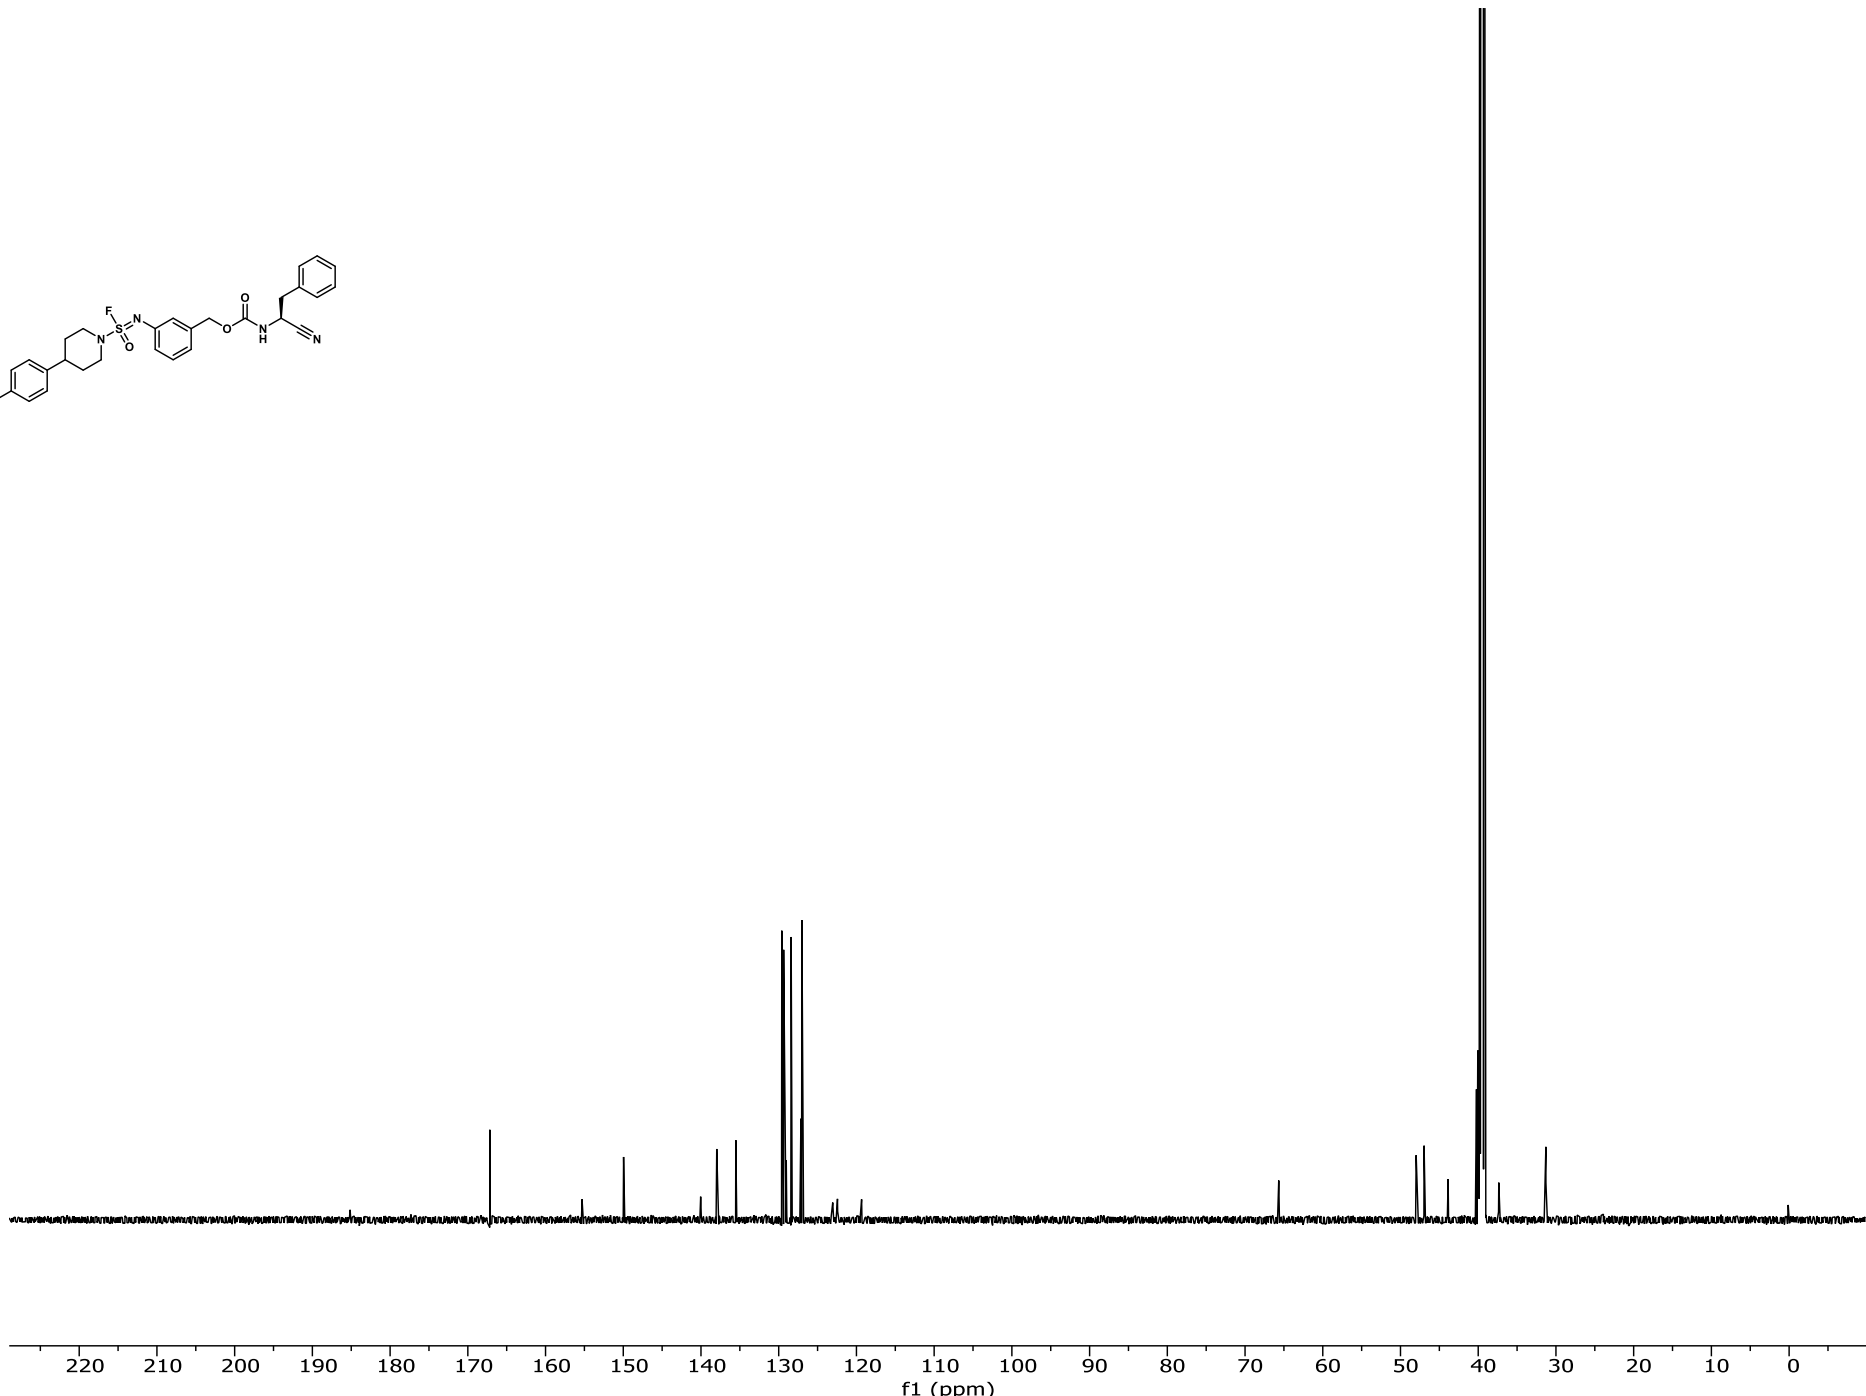

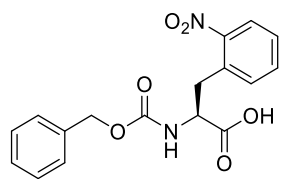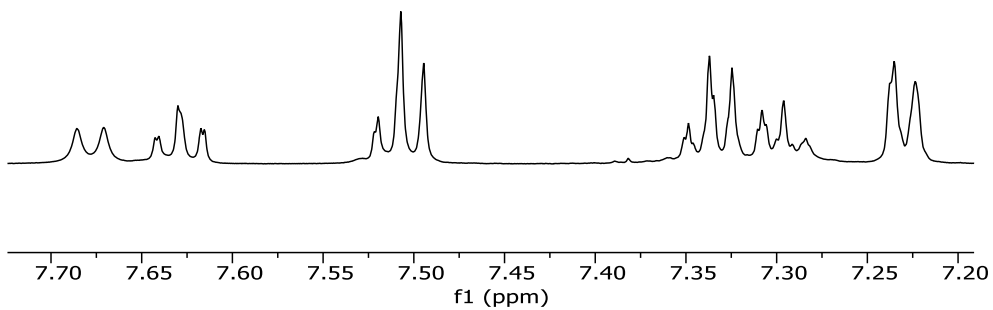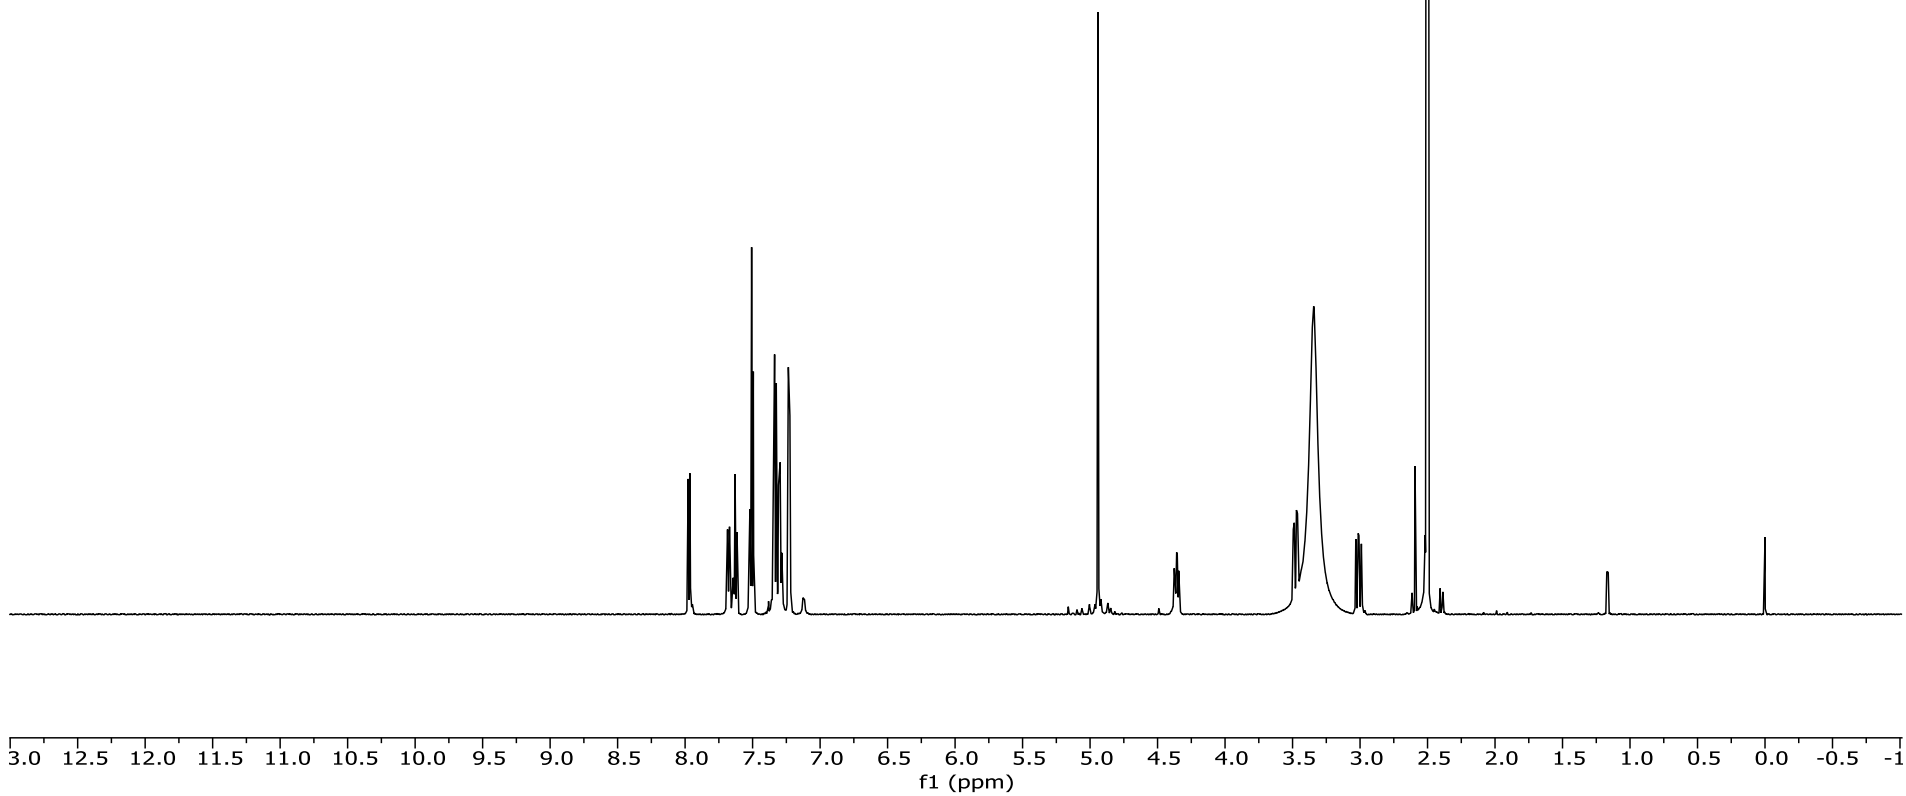

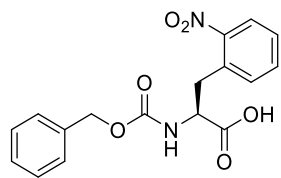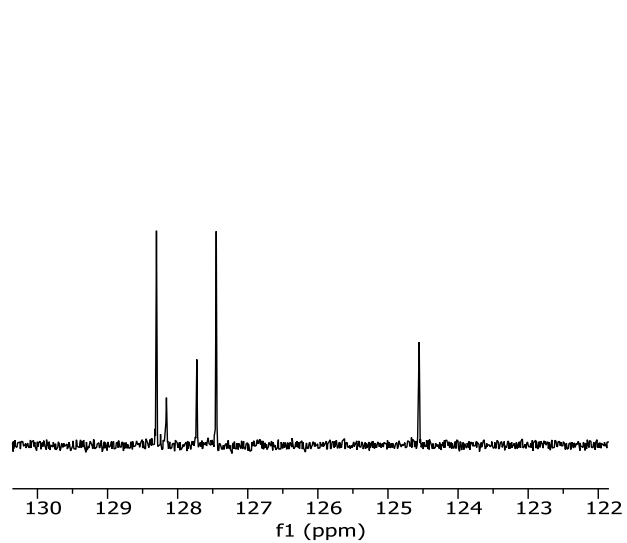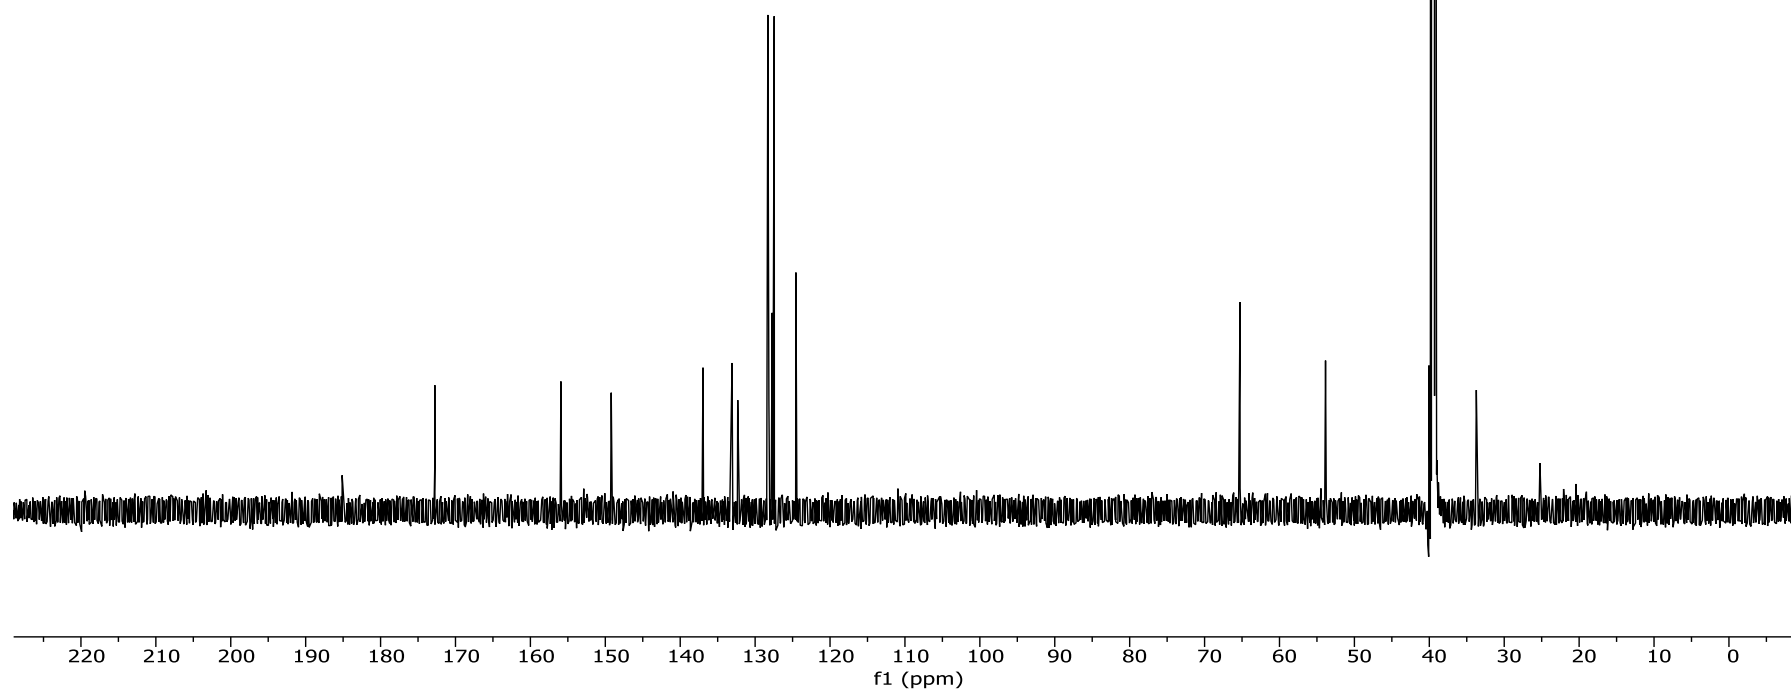

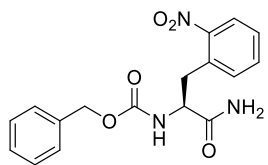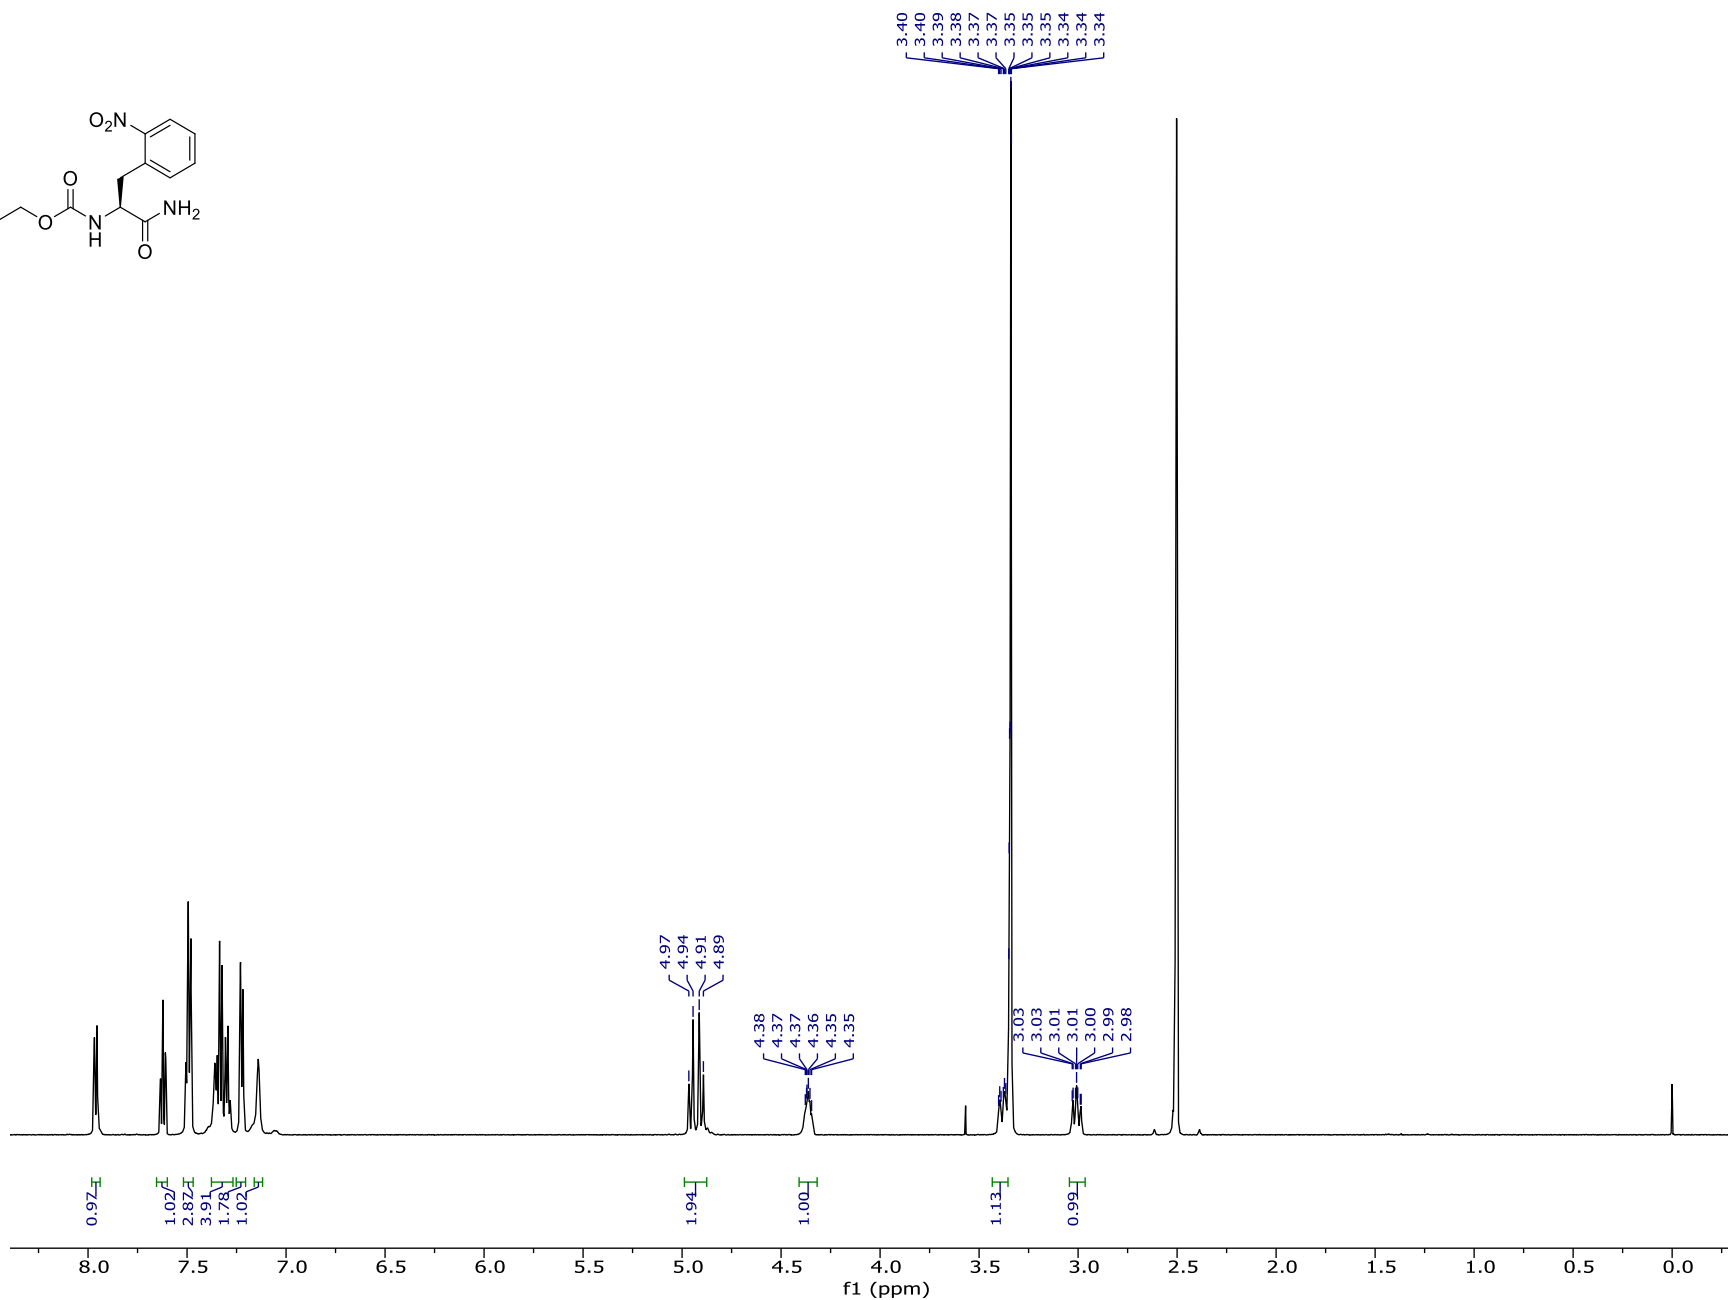

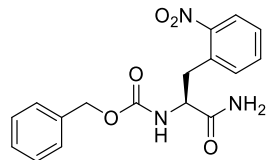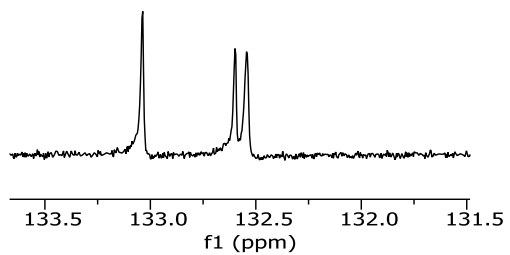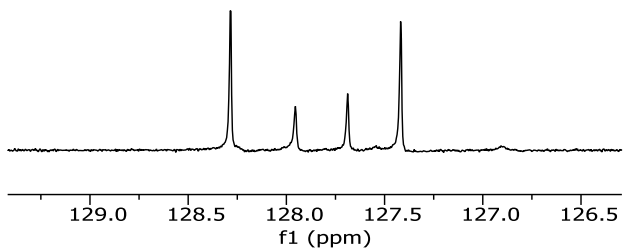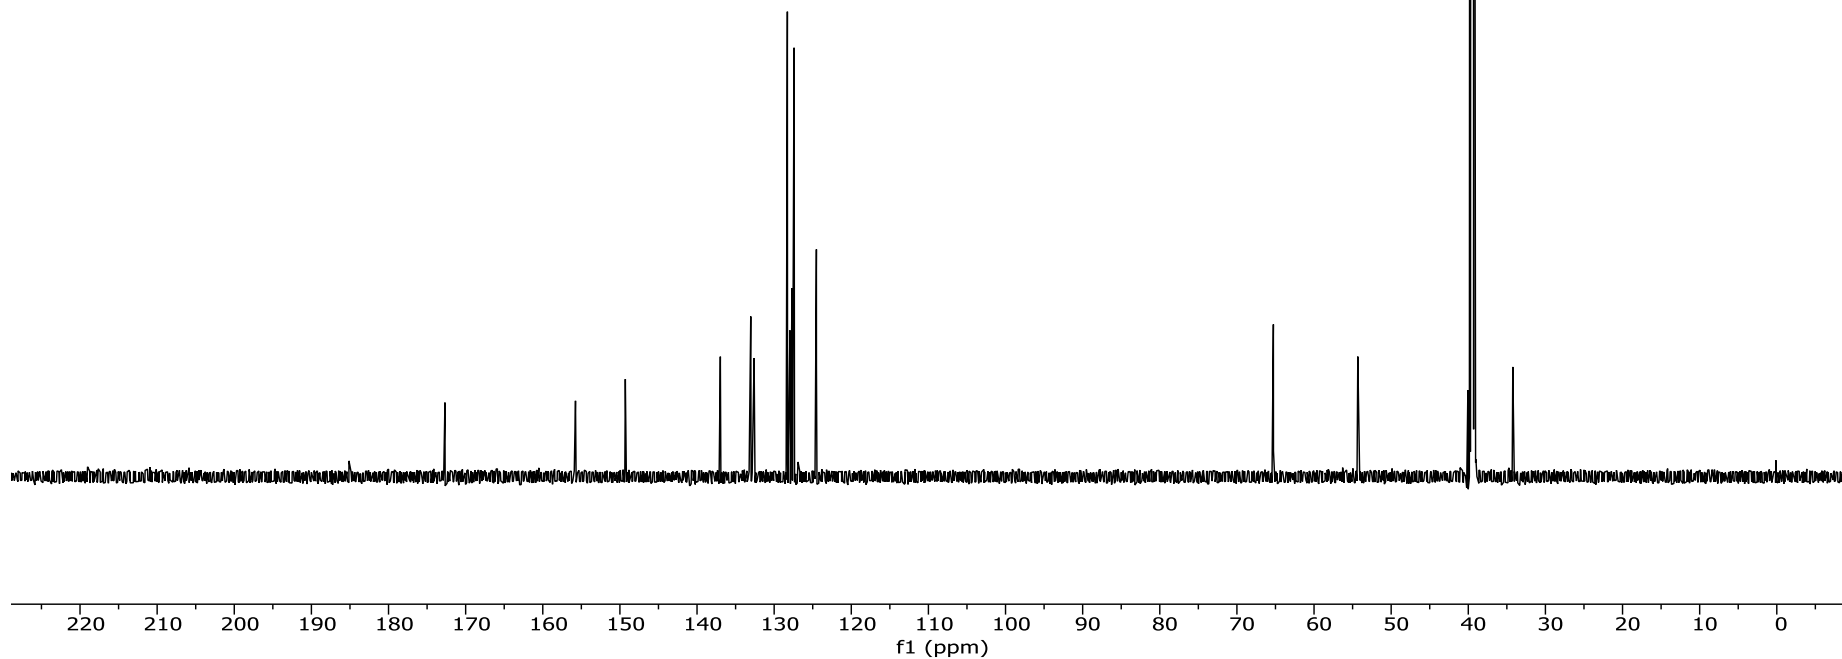

skita6002019-0408.3.fid

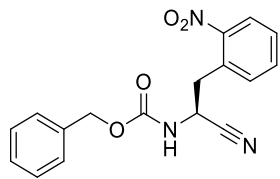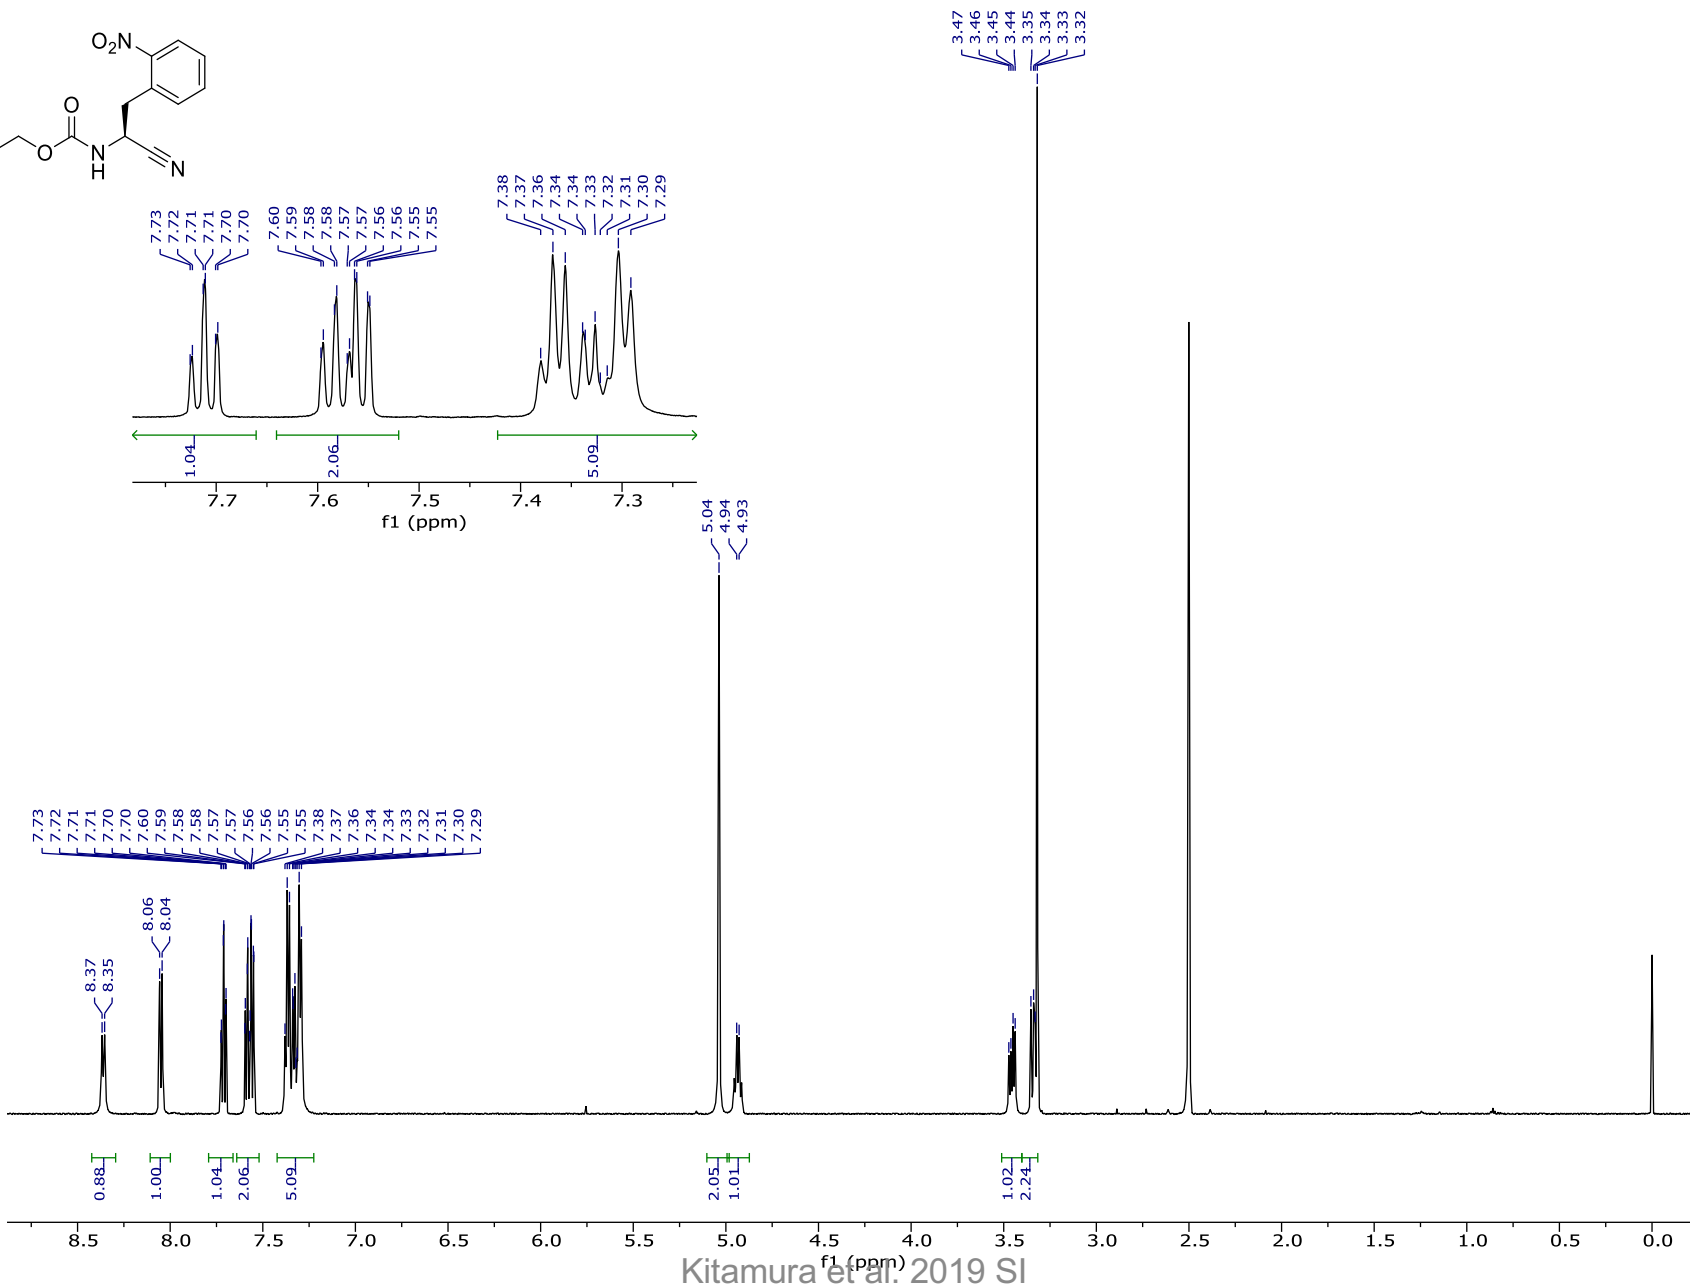

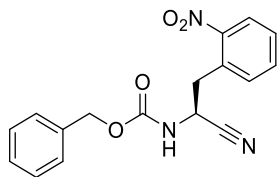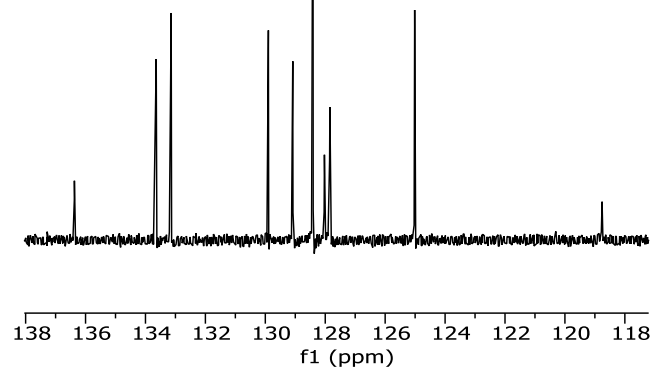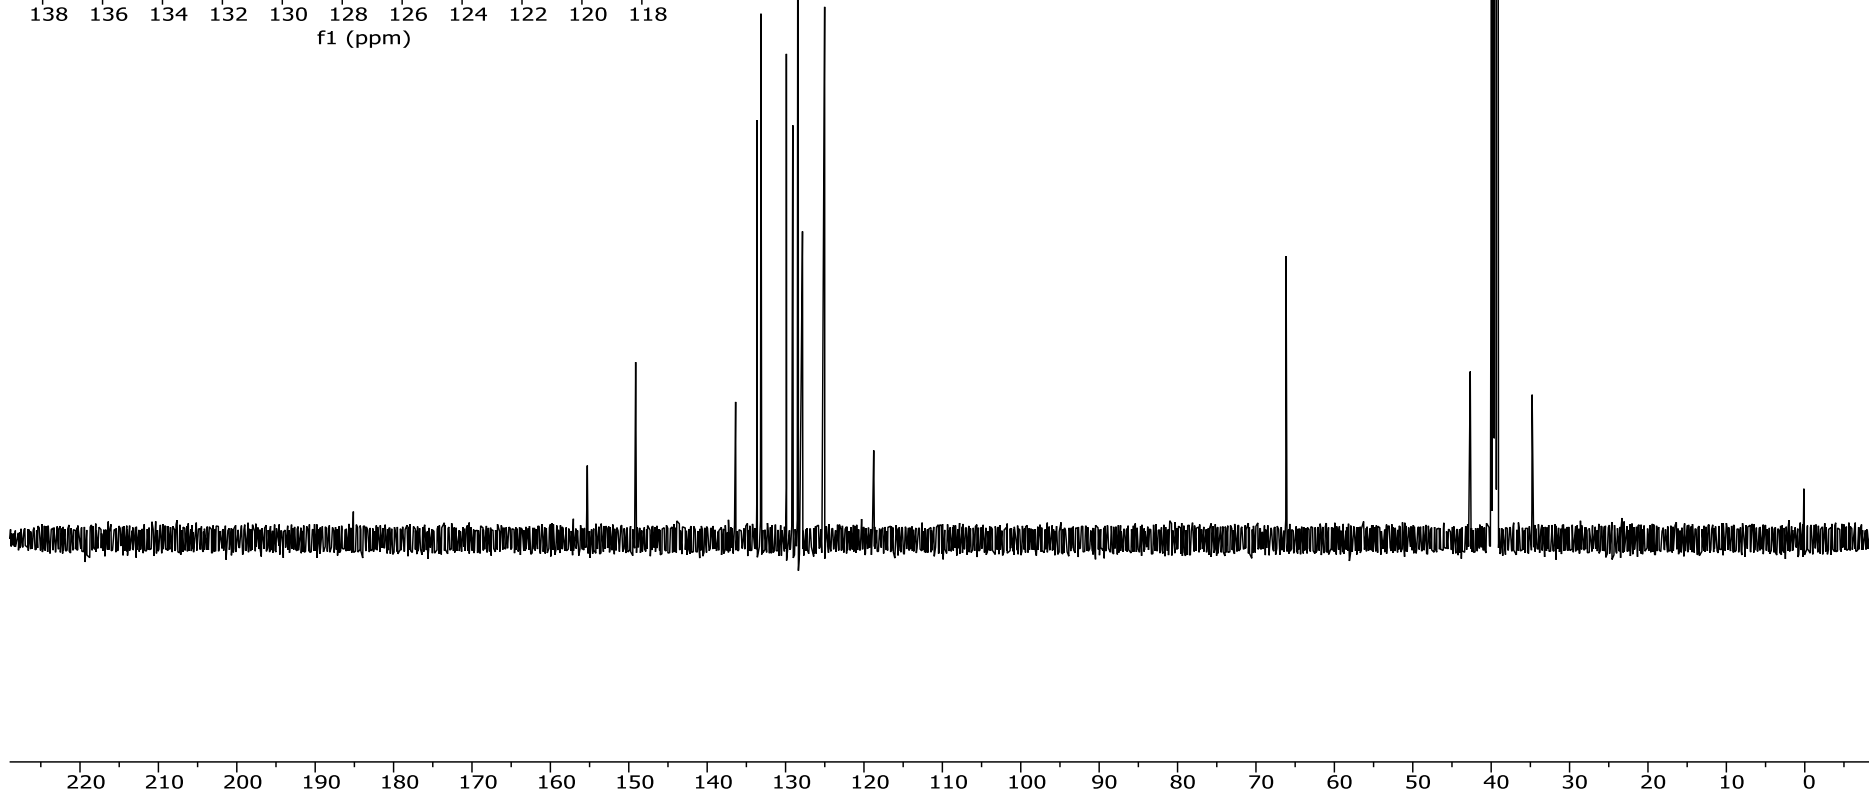



skita6002019-0503.3.fid

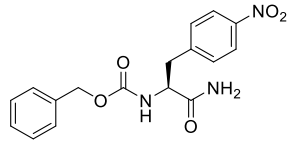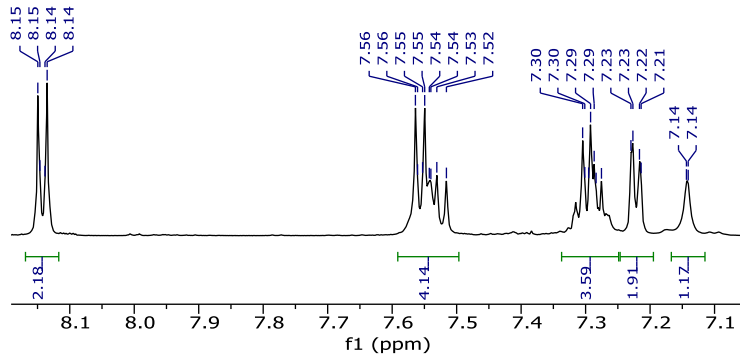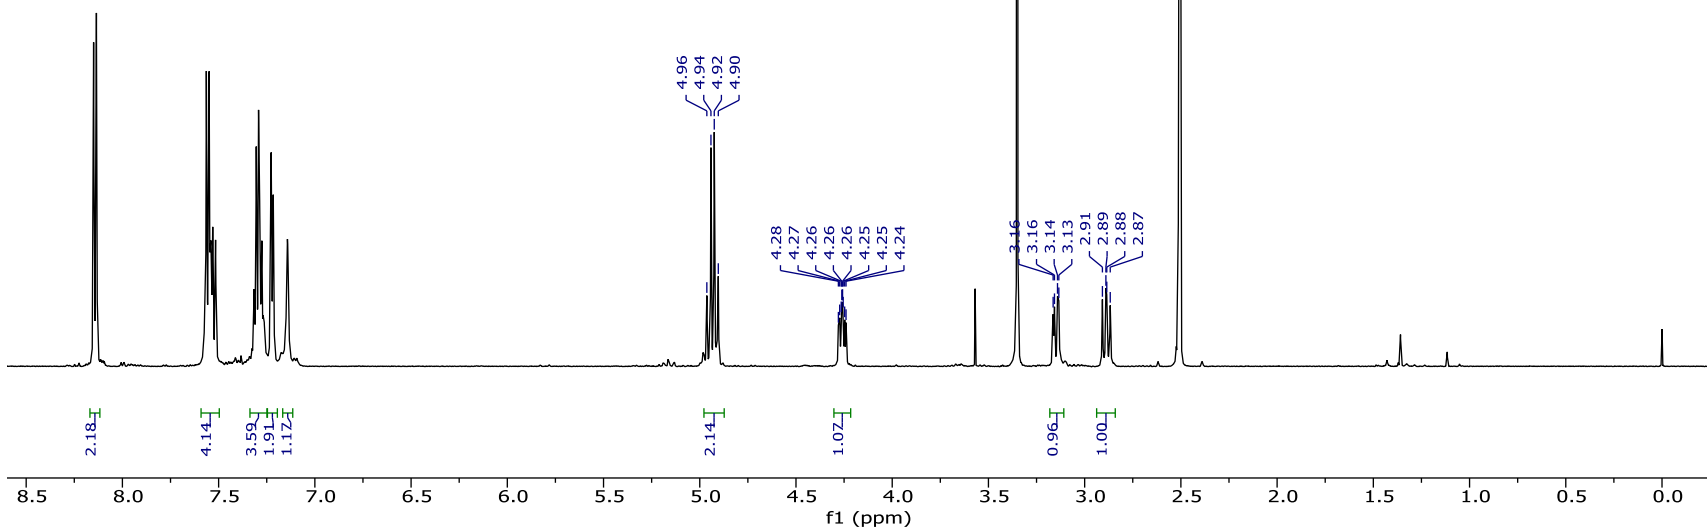

skita6002019-0503.30.fid

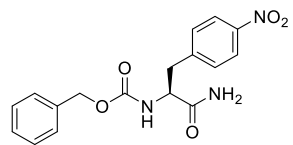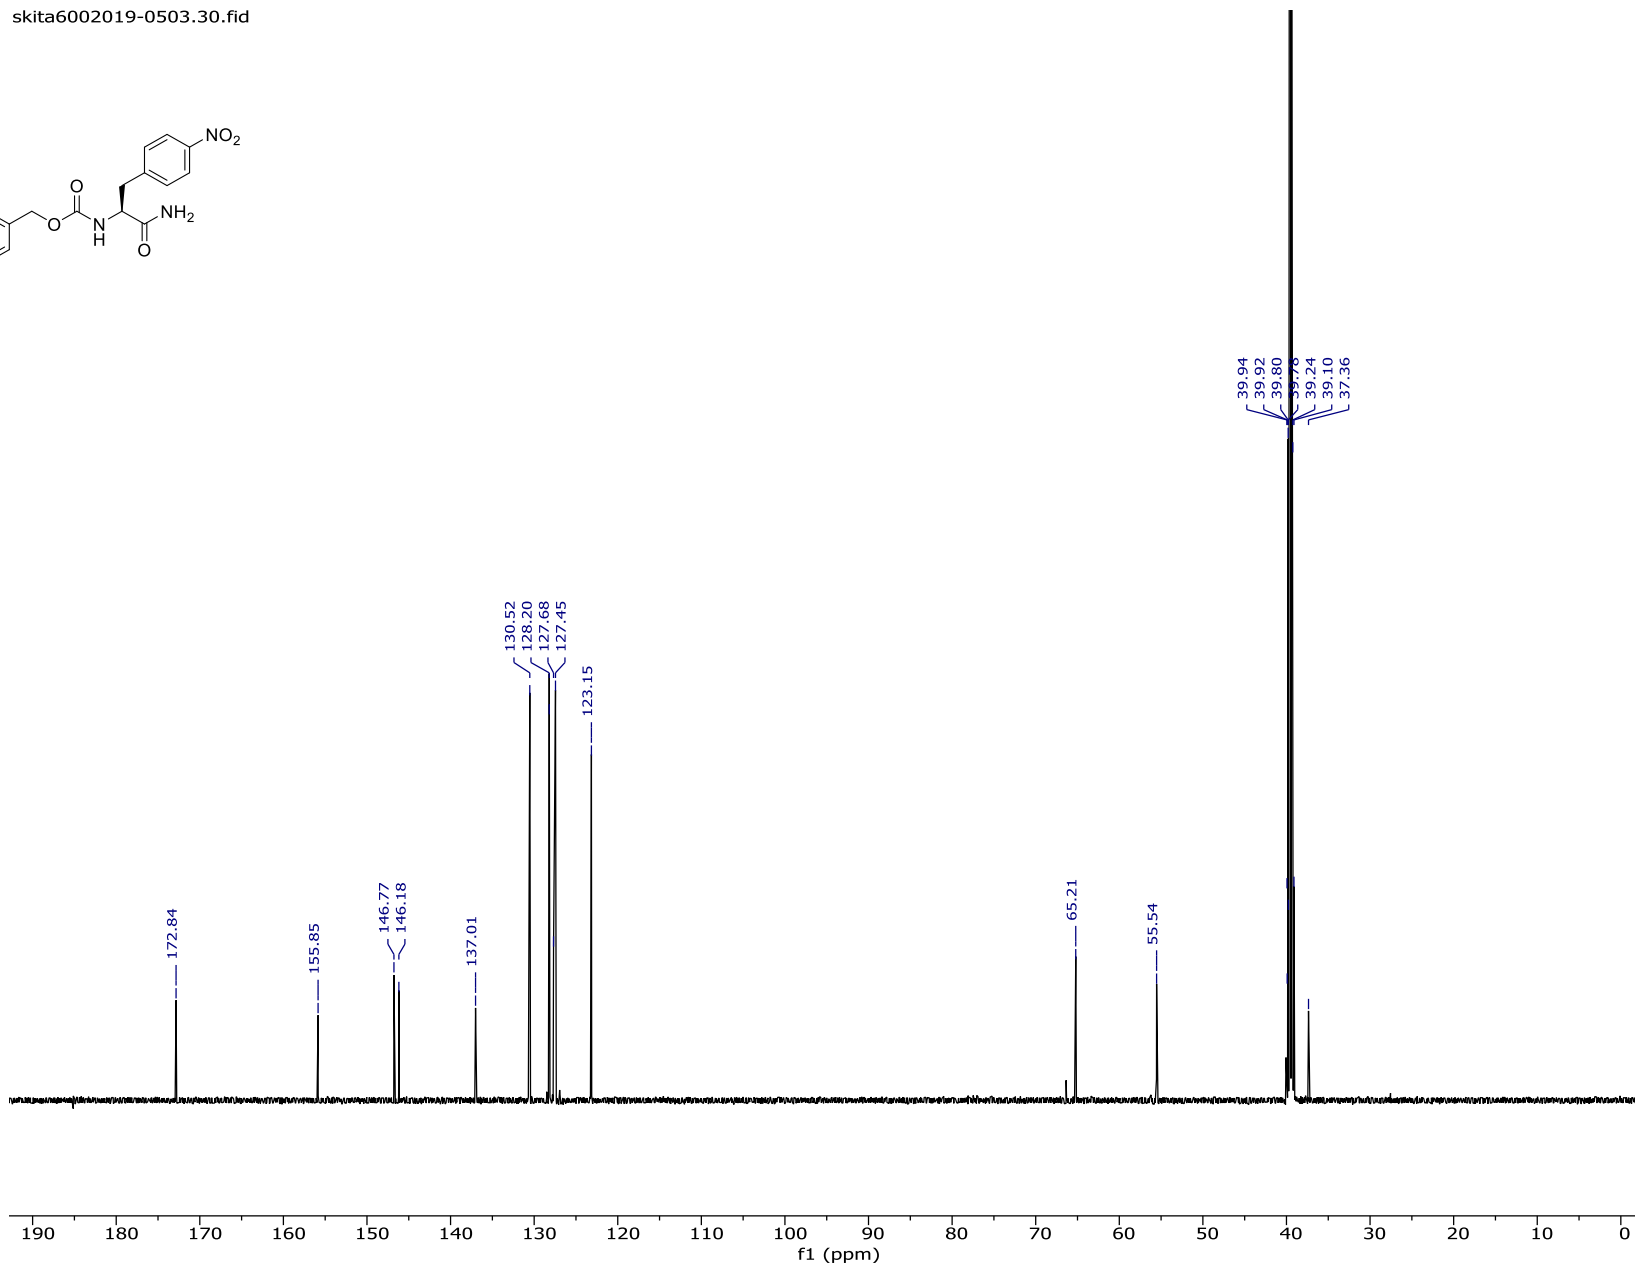

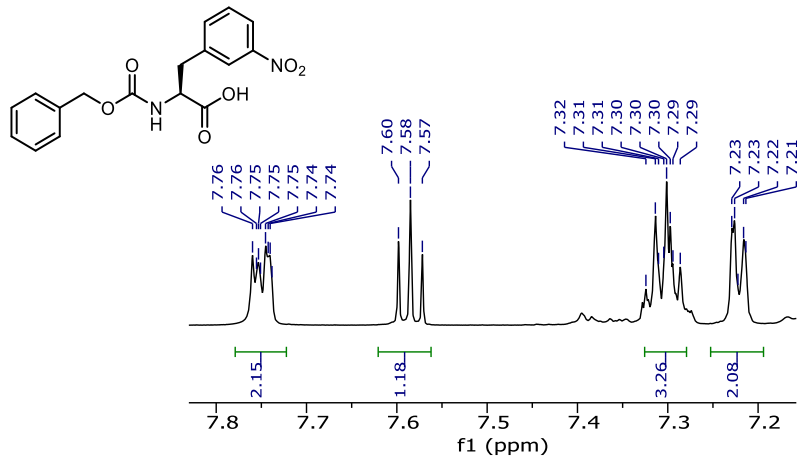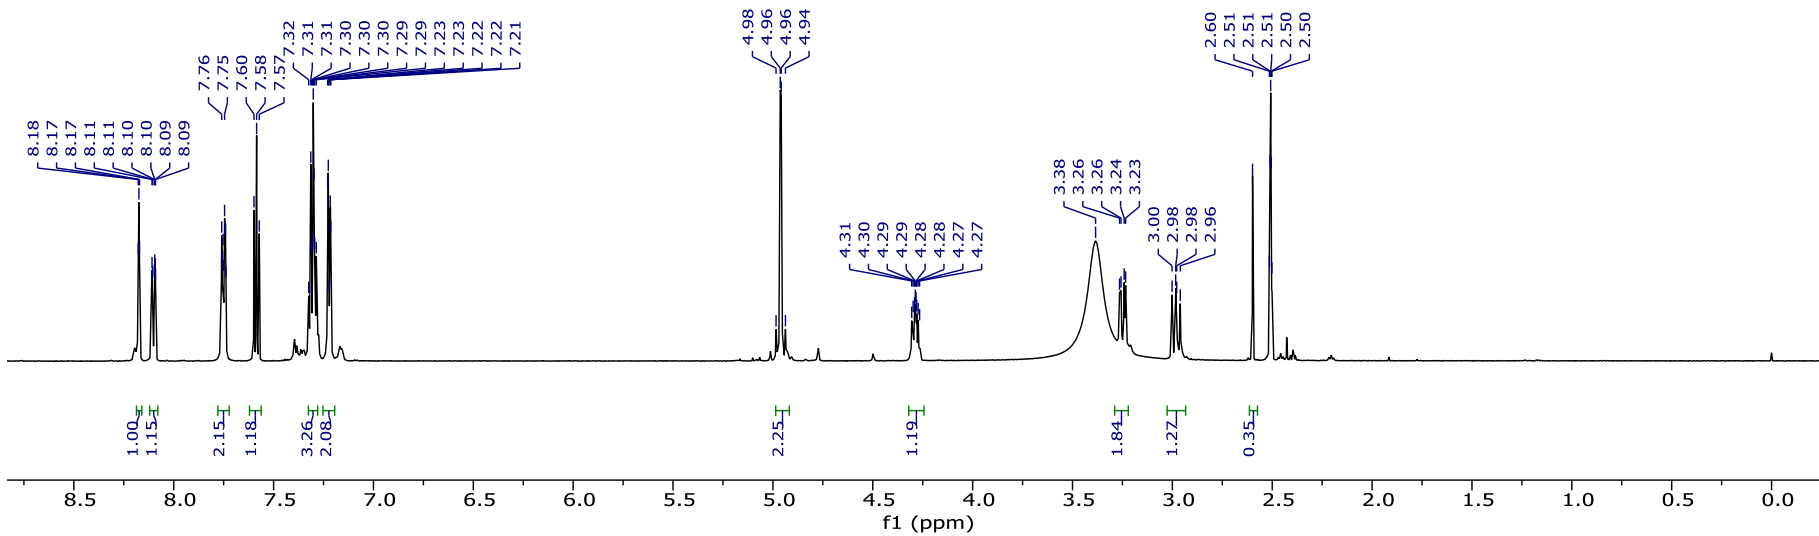

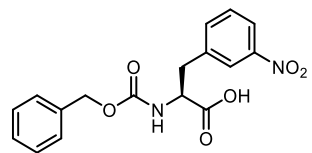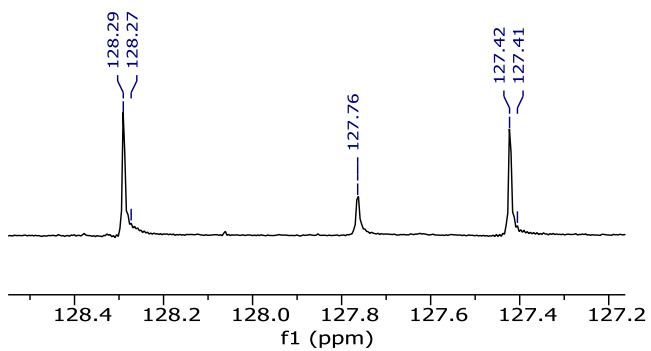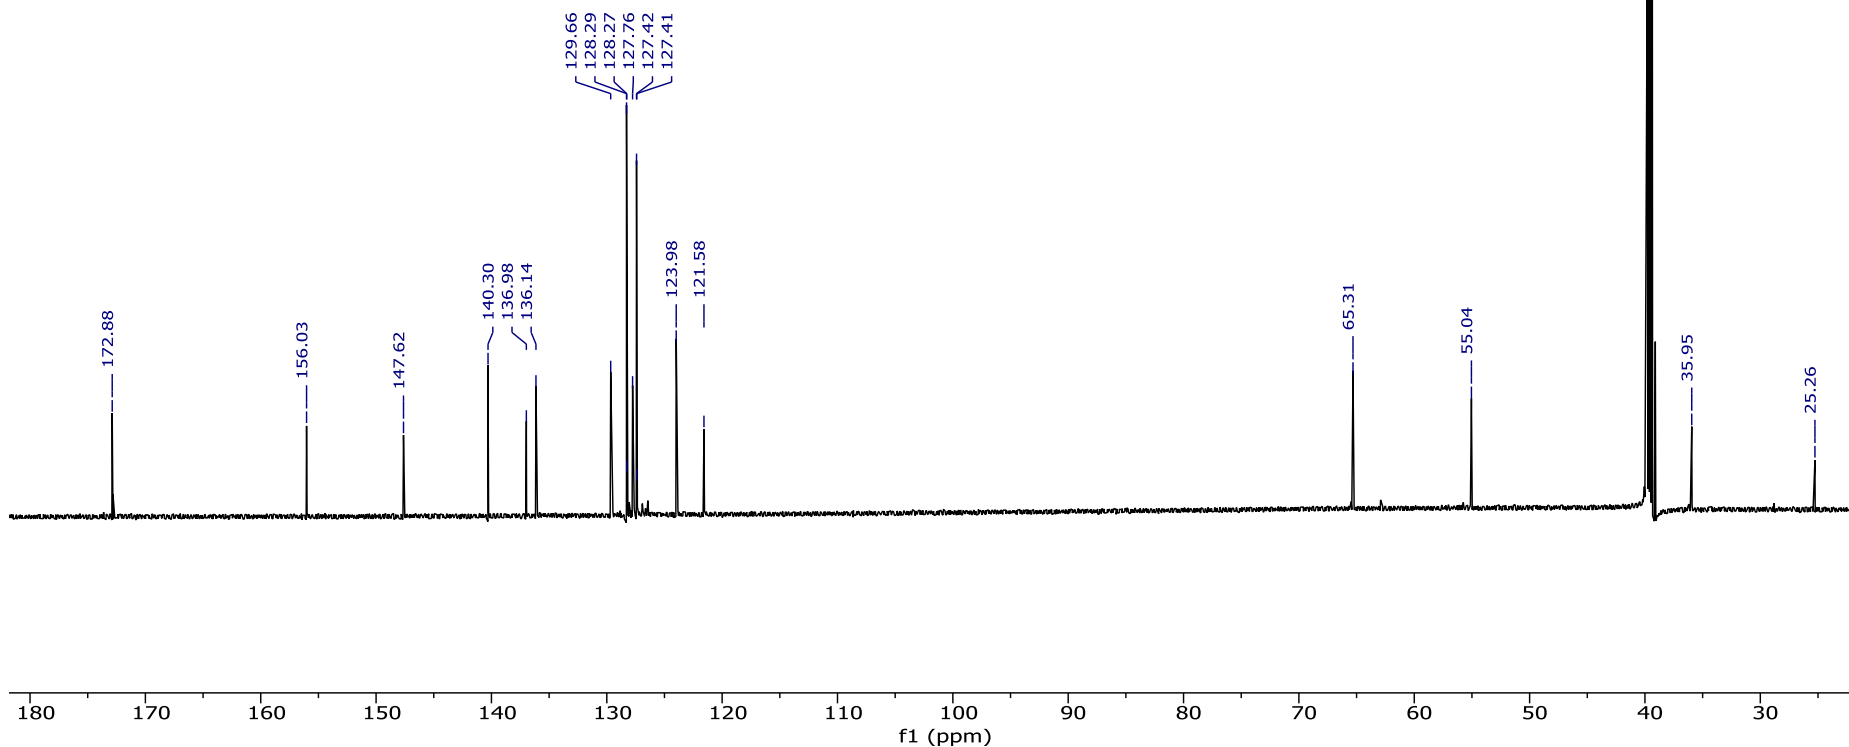

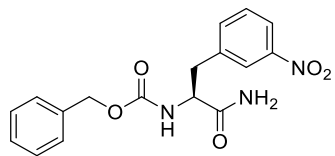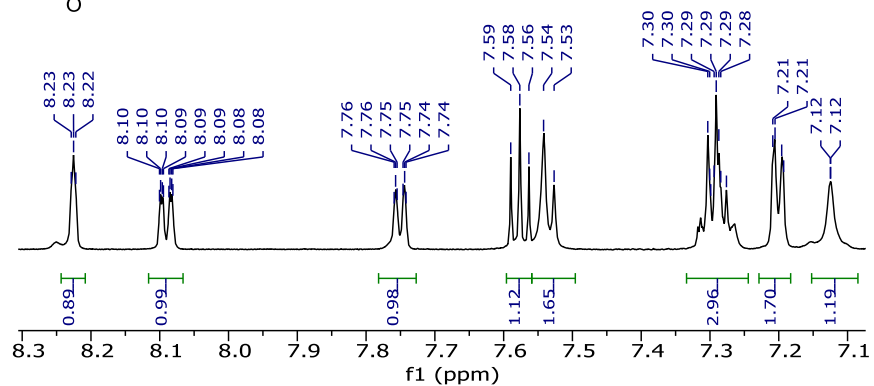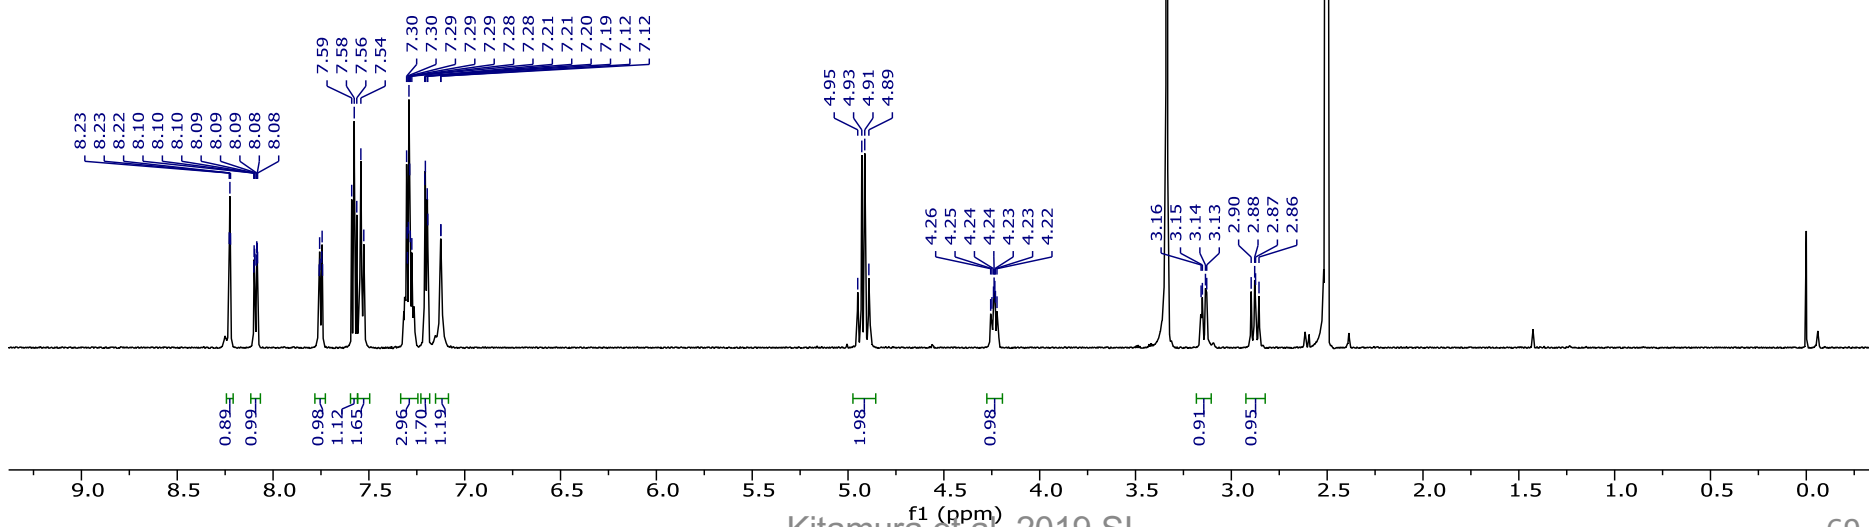

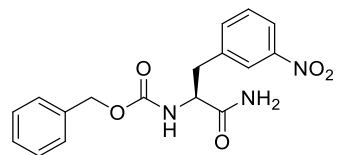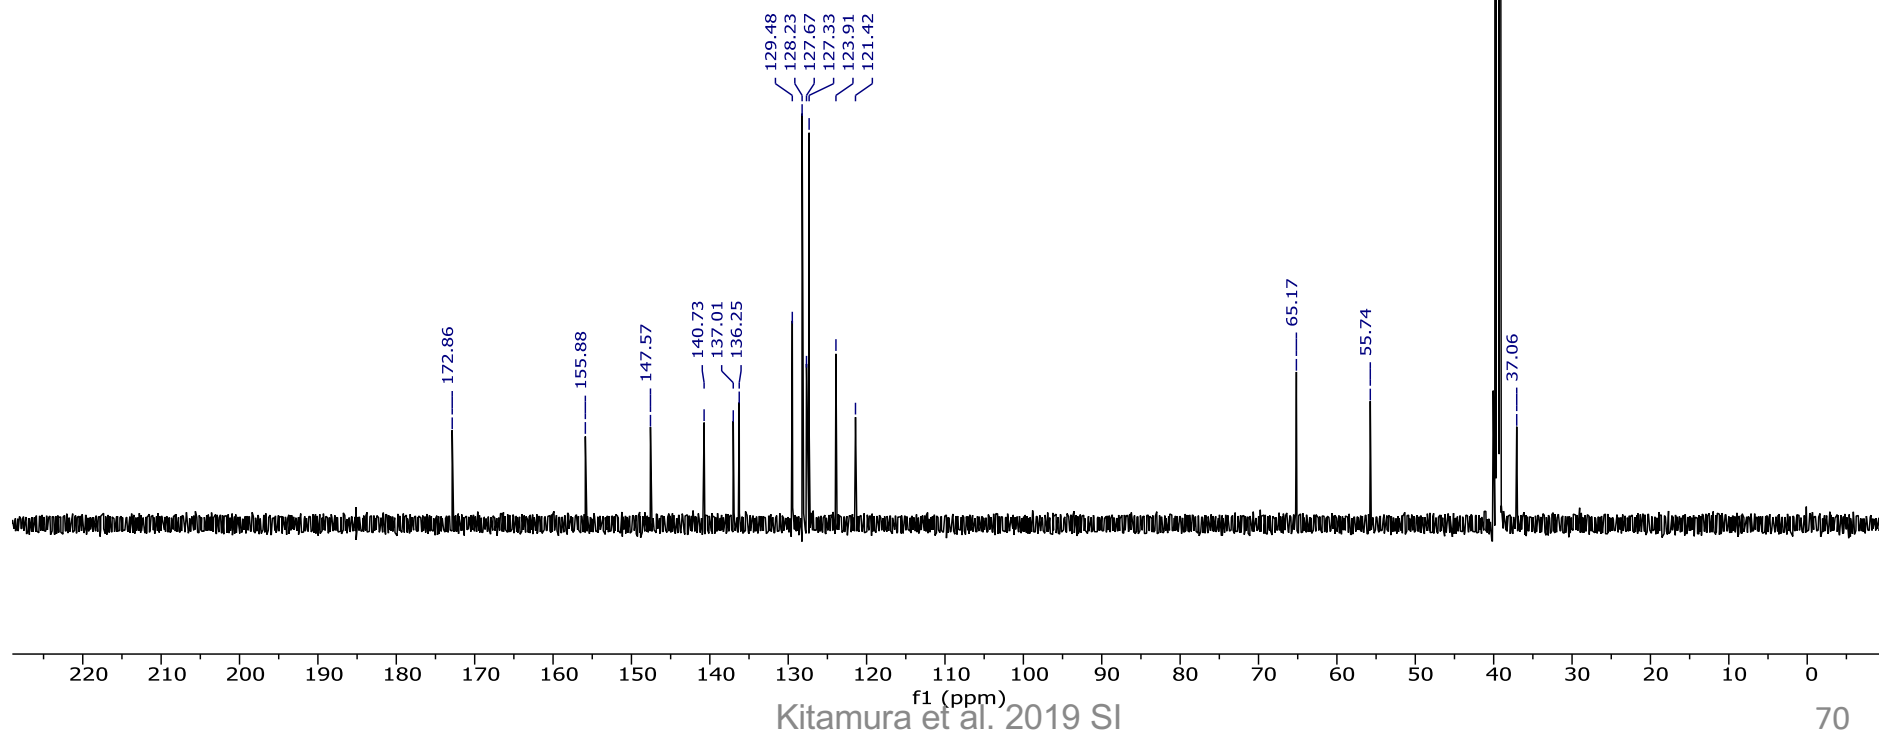

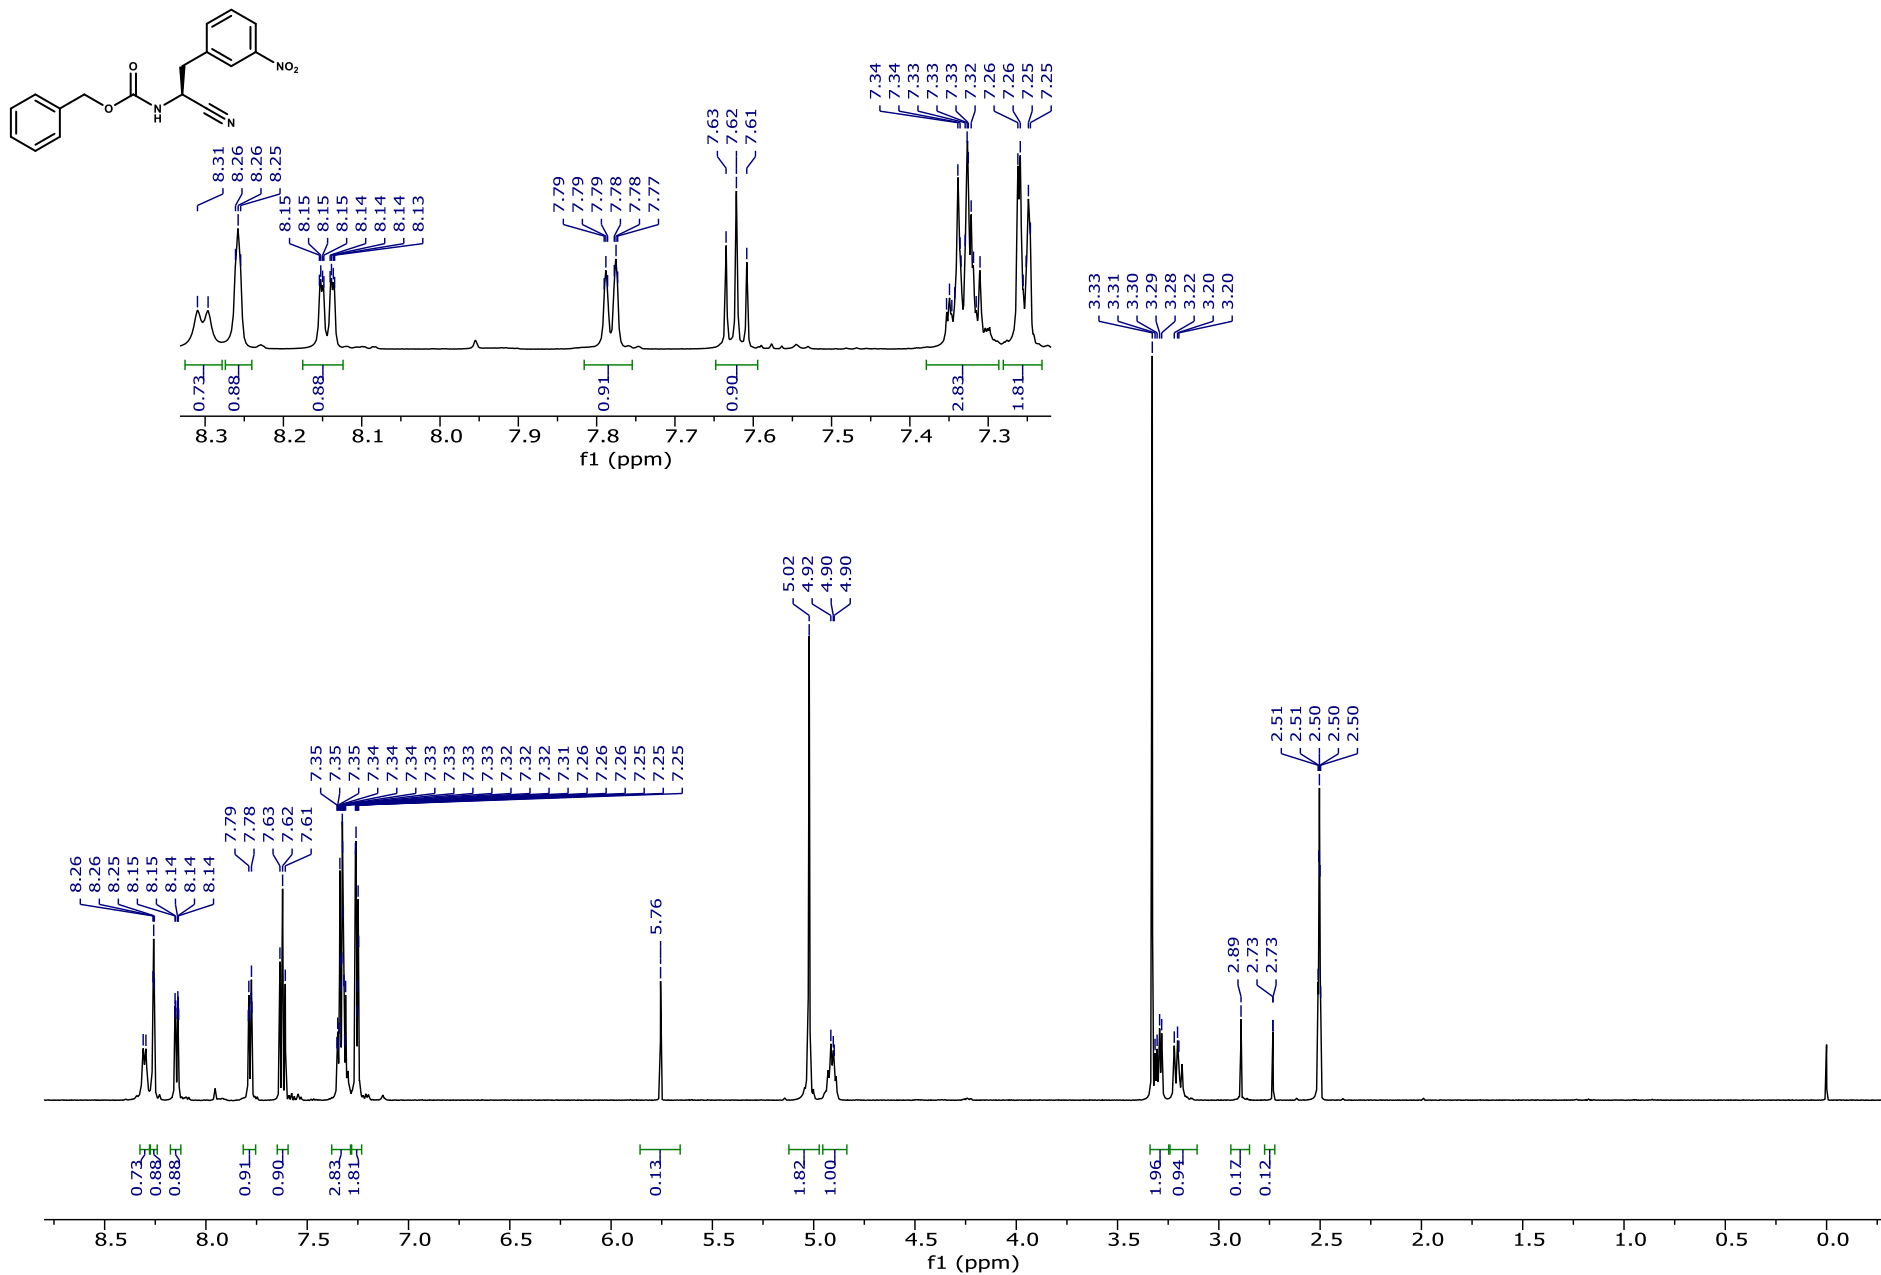

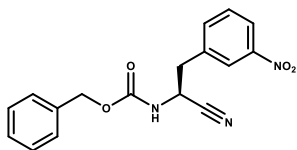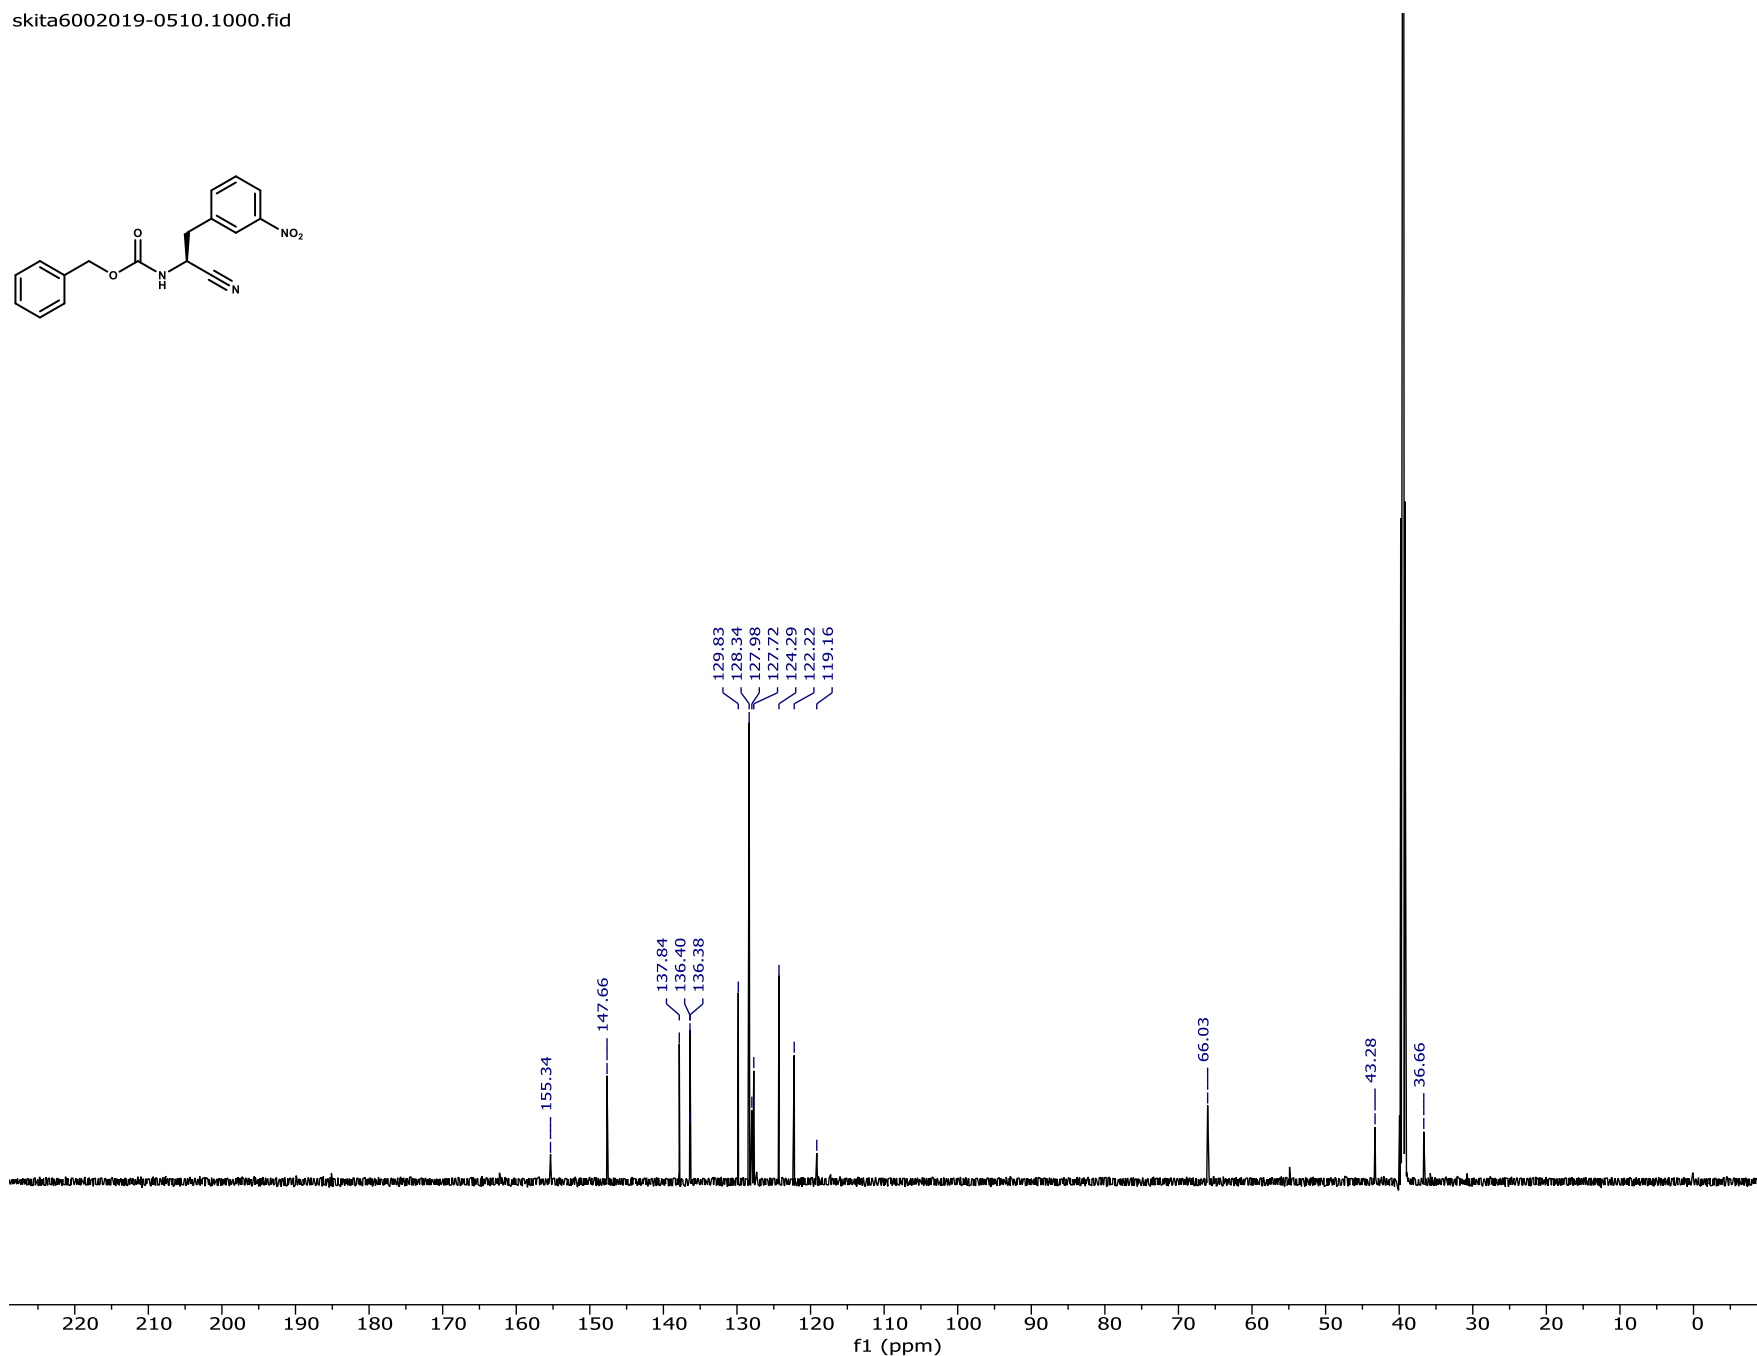



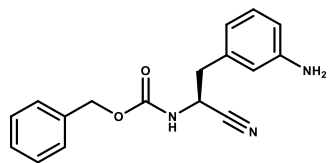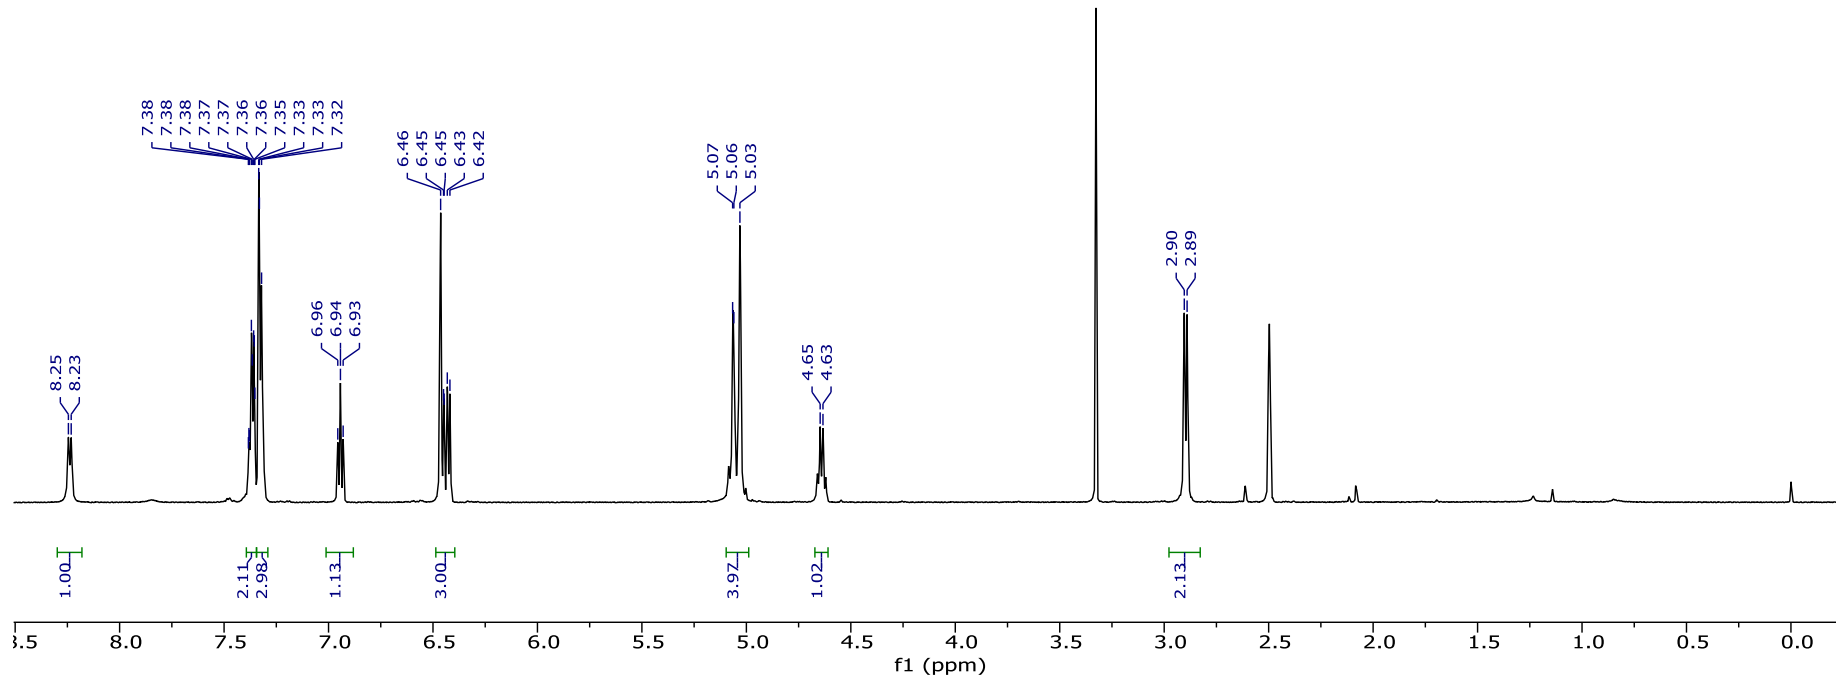

skita6002019-0429.10.fid

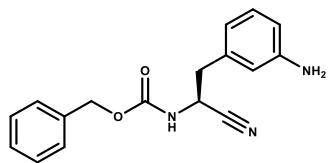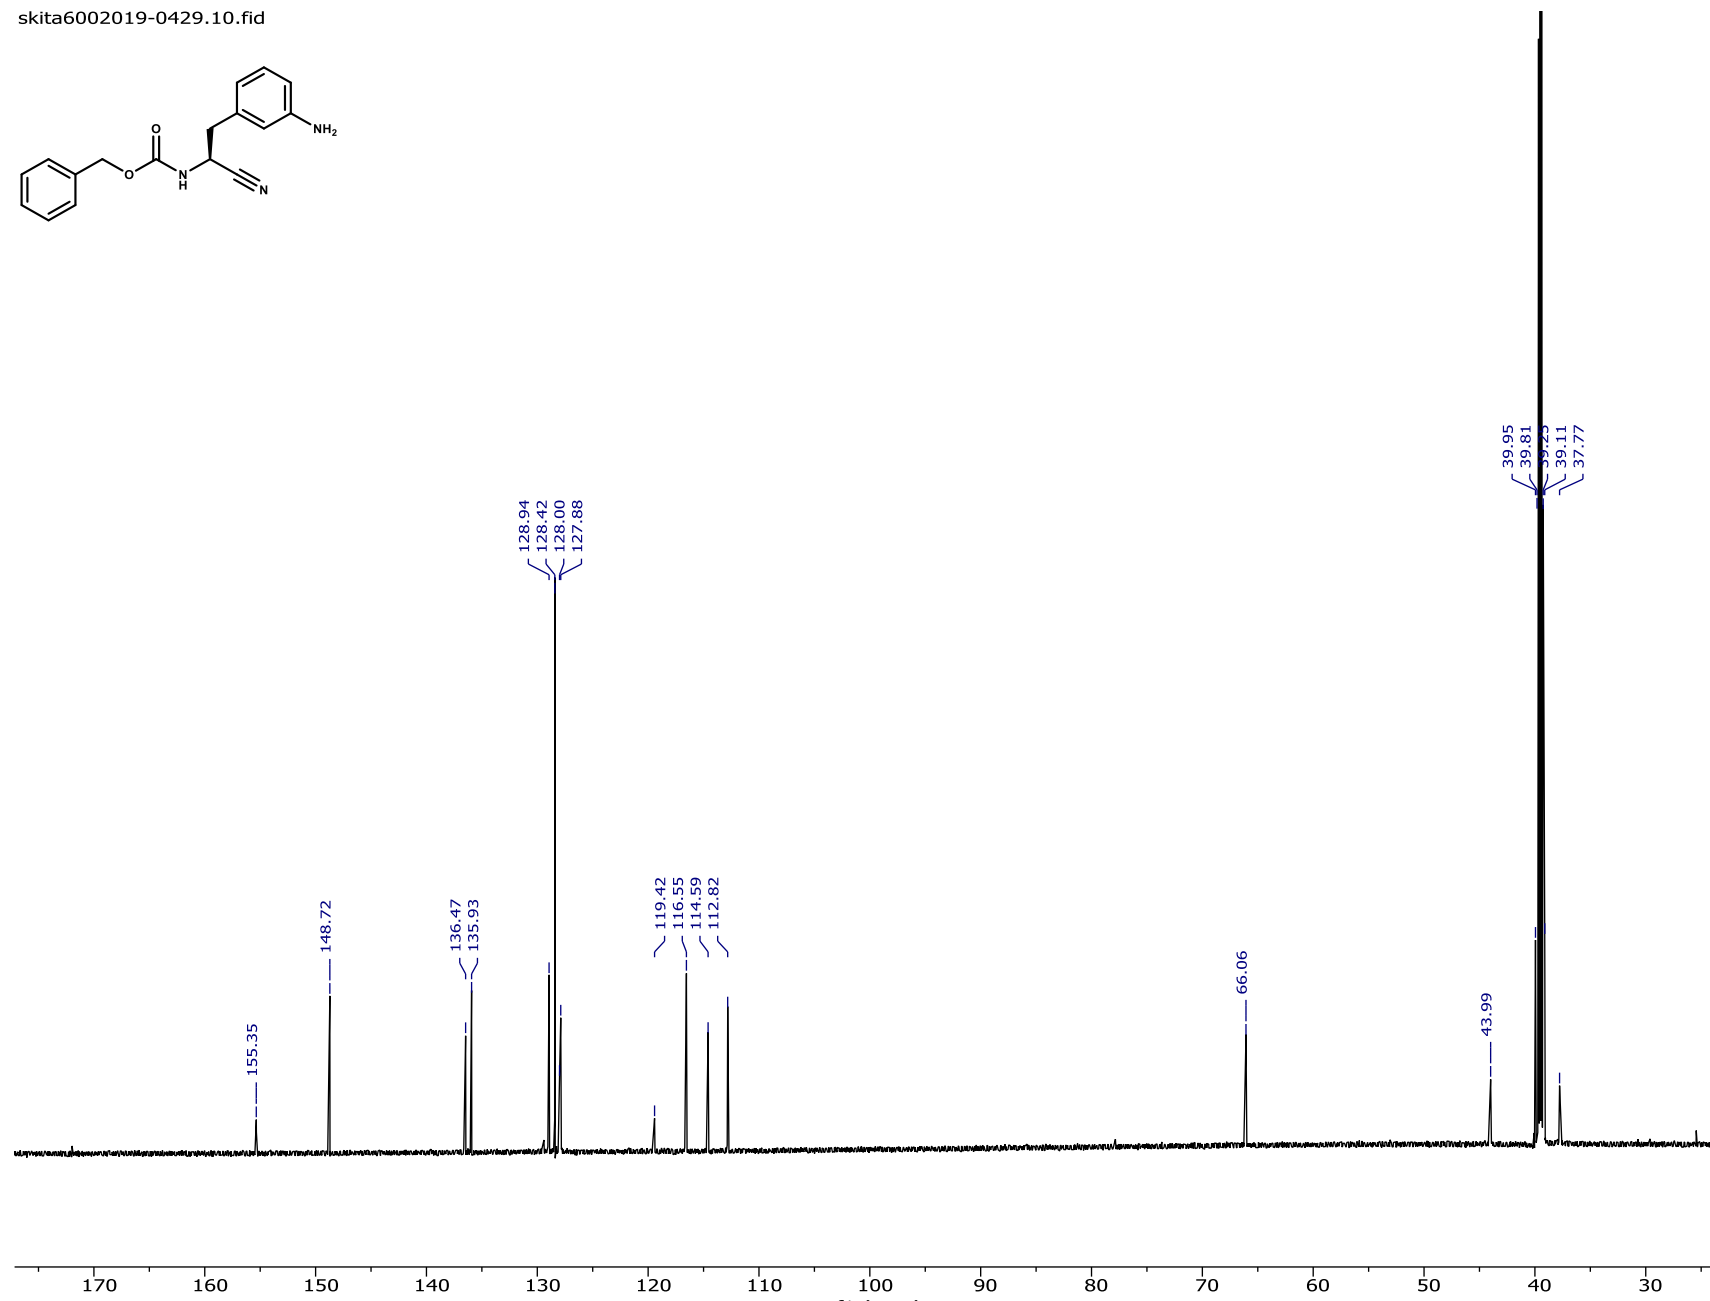

zqh-1983-600.1.fid – C-13 Routine 1D, CPDCH CryoProbe, AVIII-600

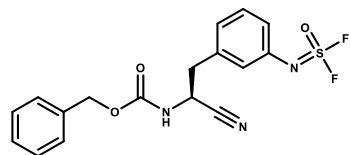

— 7.26 CDCl<sub>3</sub>

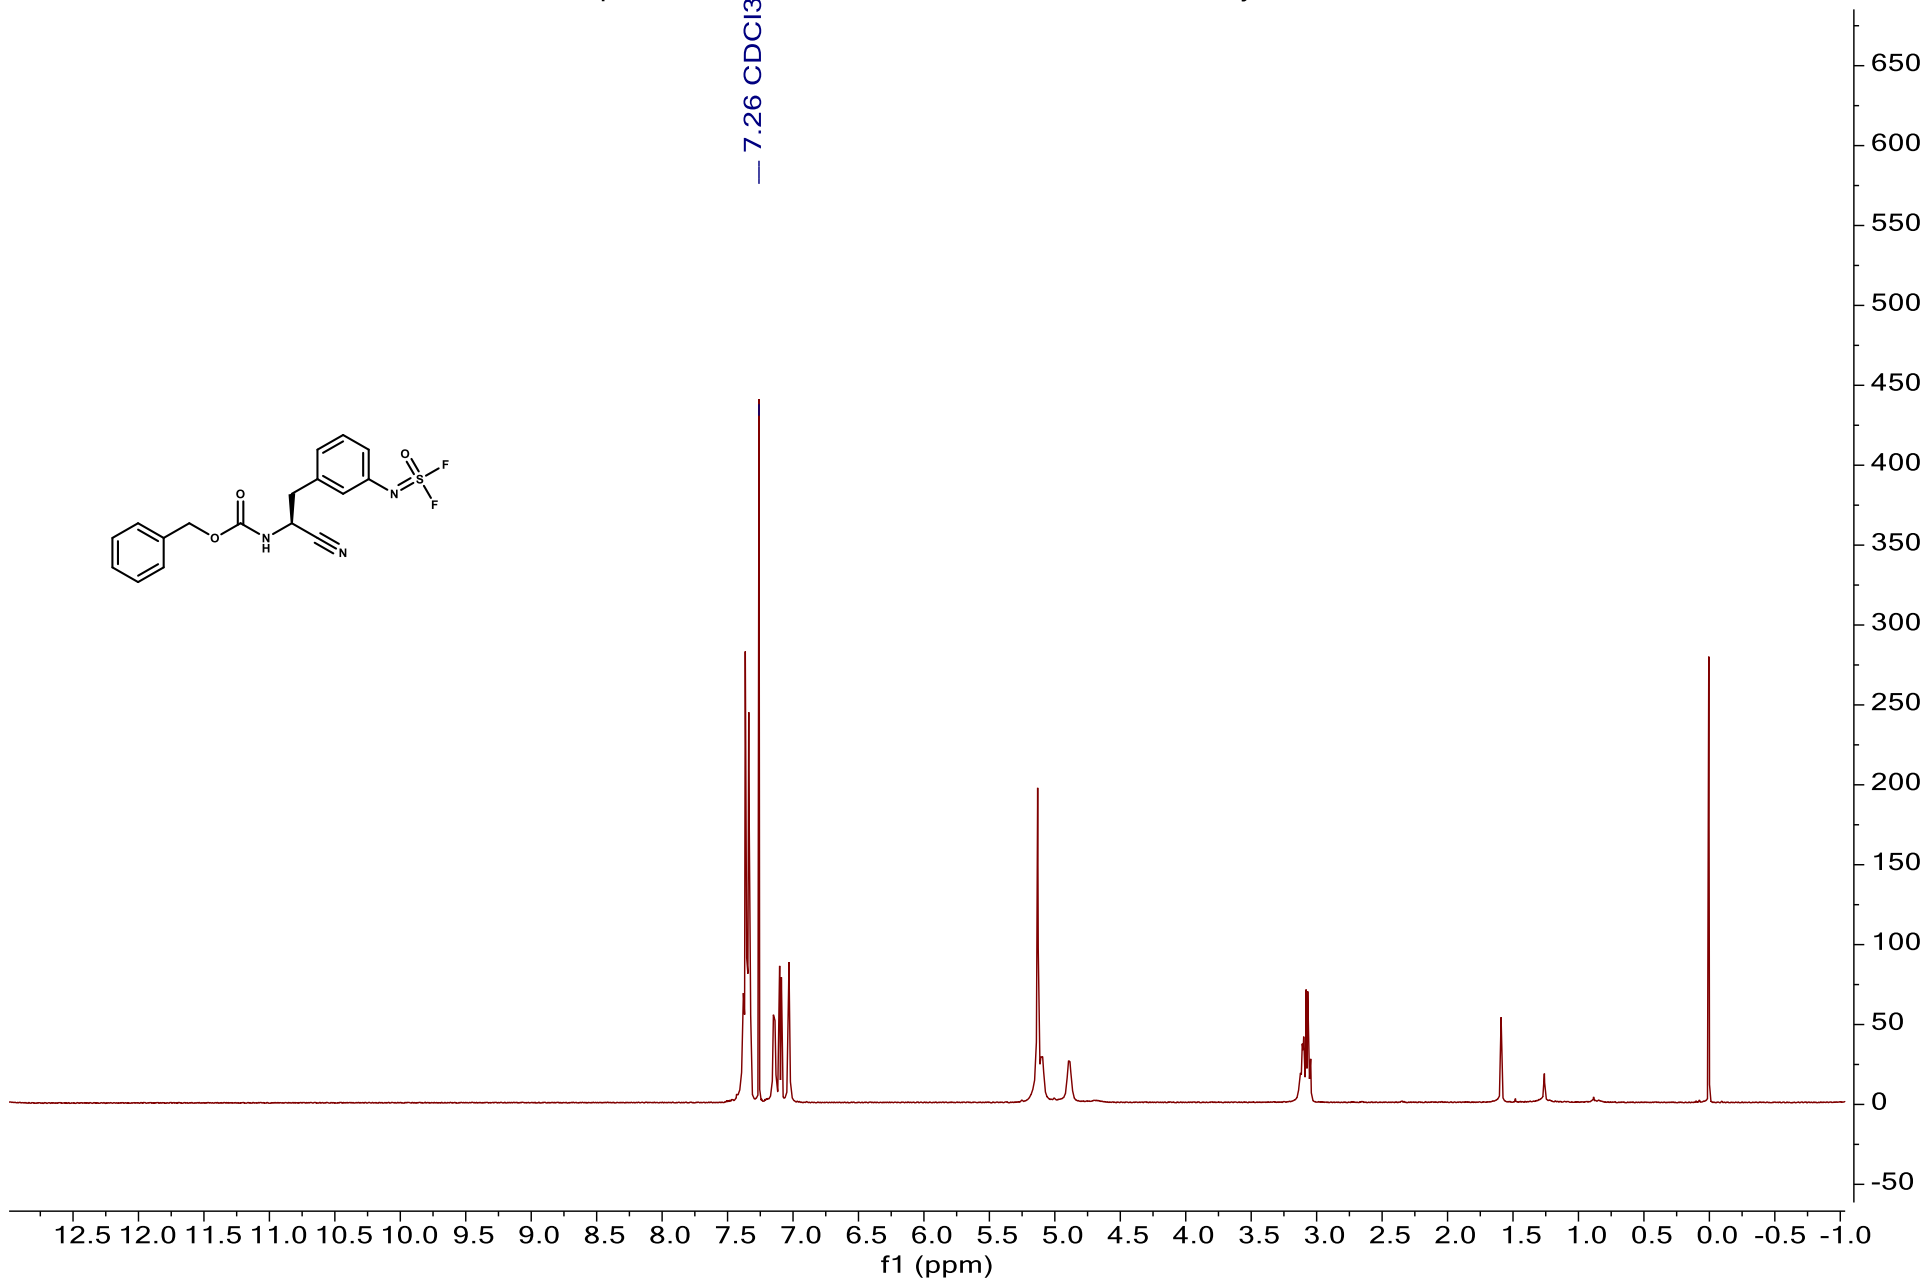

zqh-1983-600.2.fid —

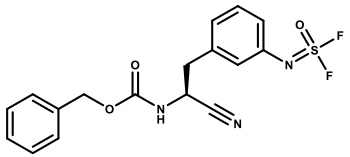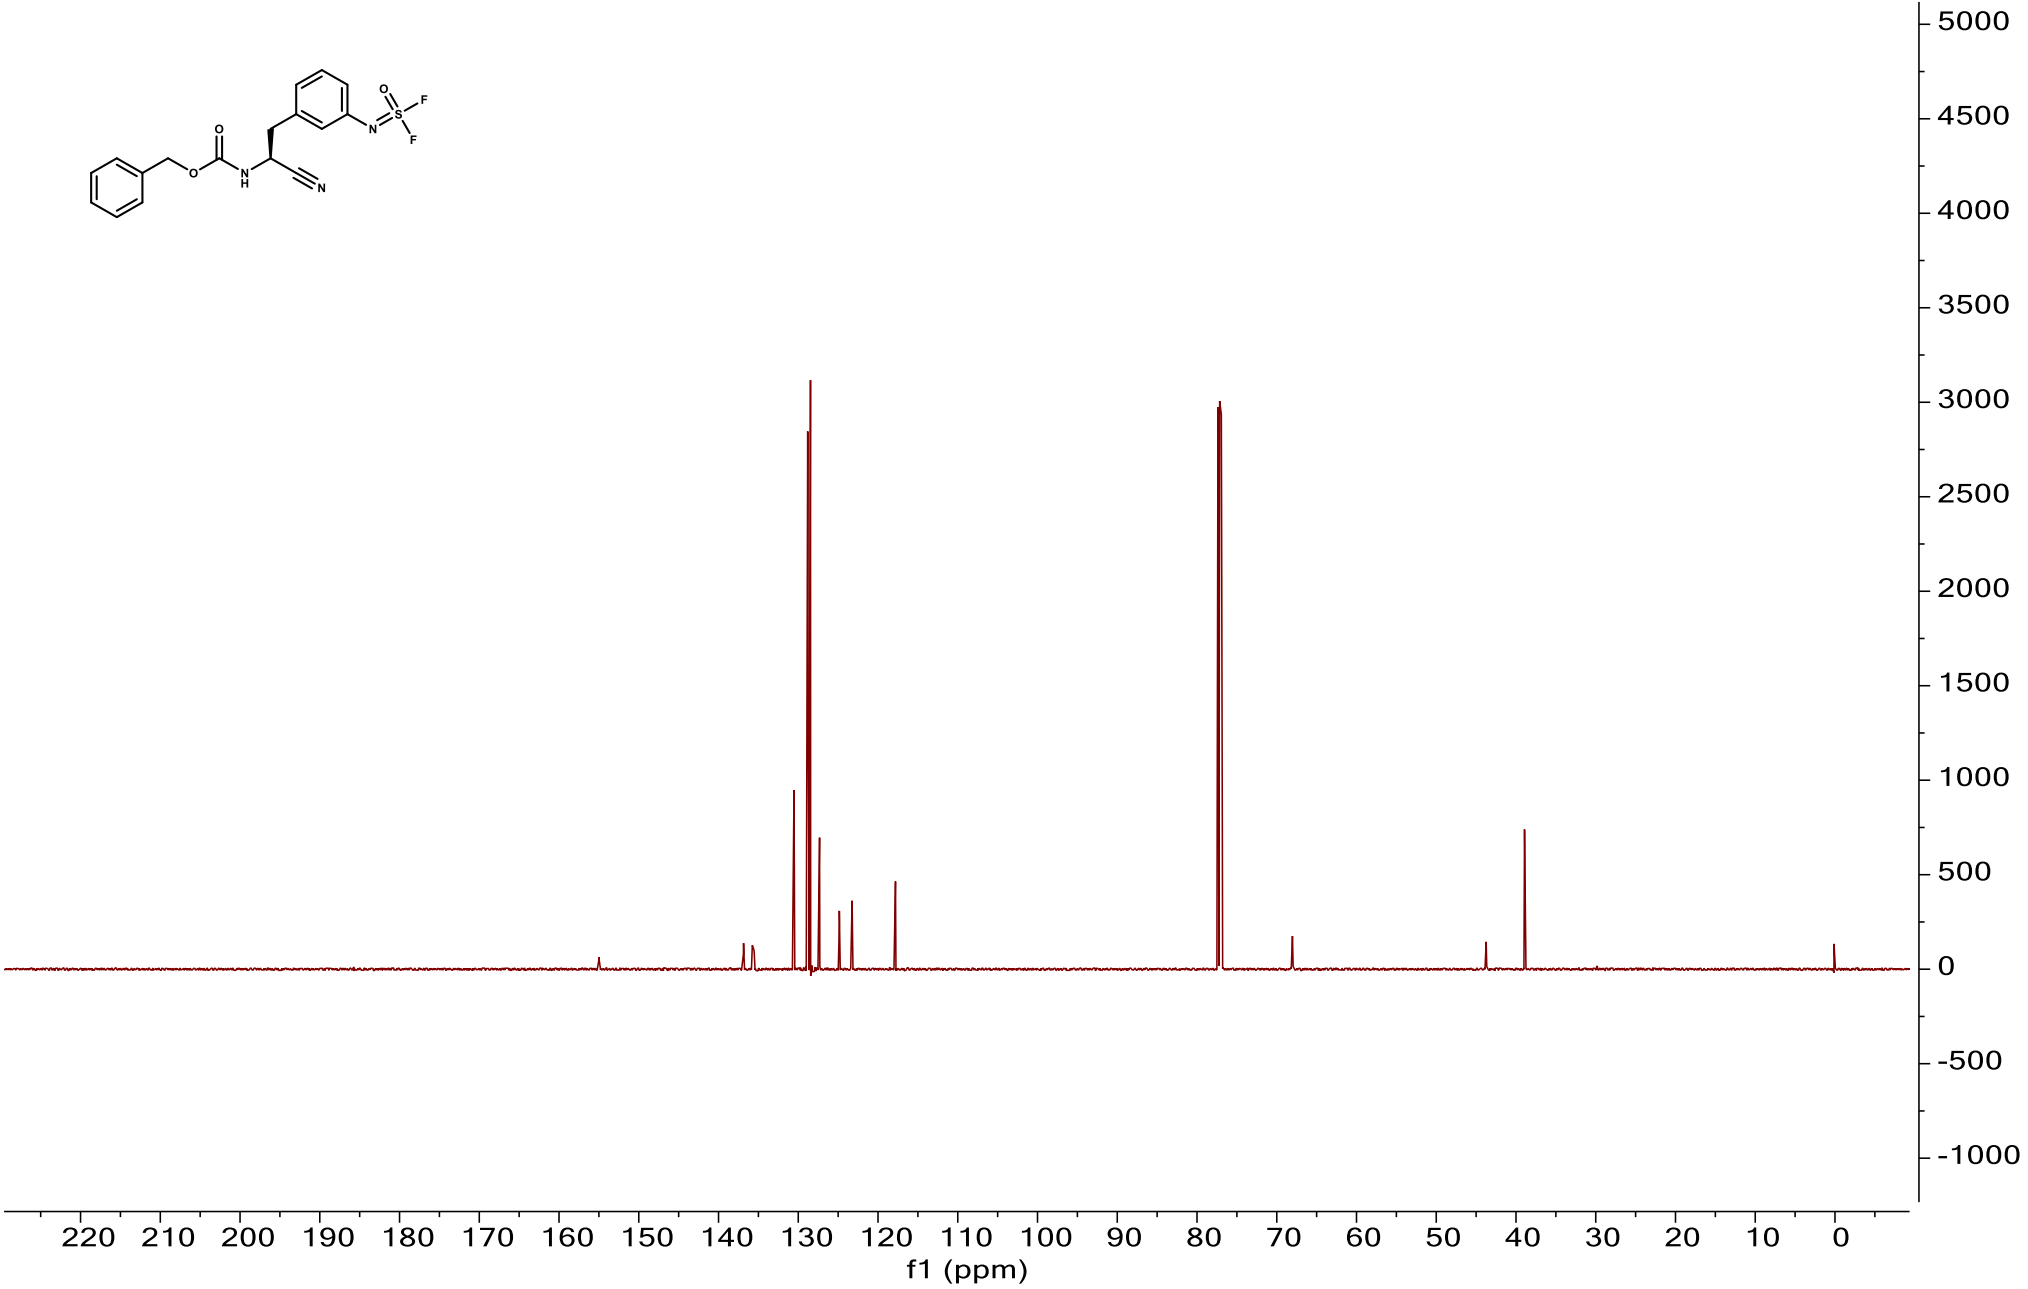

zqh-1983-400.1.fid – F-19, CDCl<sub>3</sub>, DPX-400 QNP Probe. CF<sub>3</sub>Cl as Ref at 0 ppm.

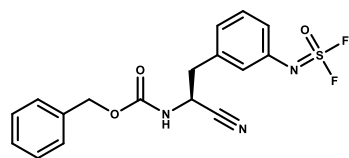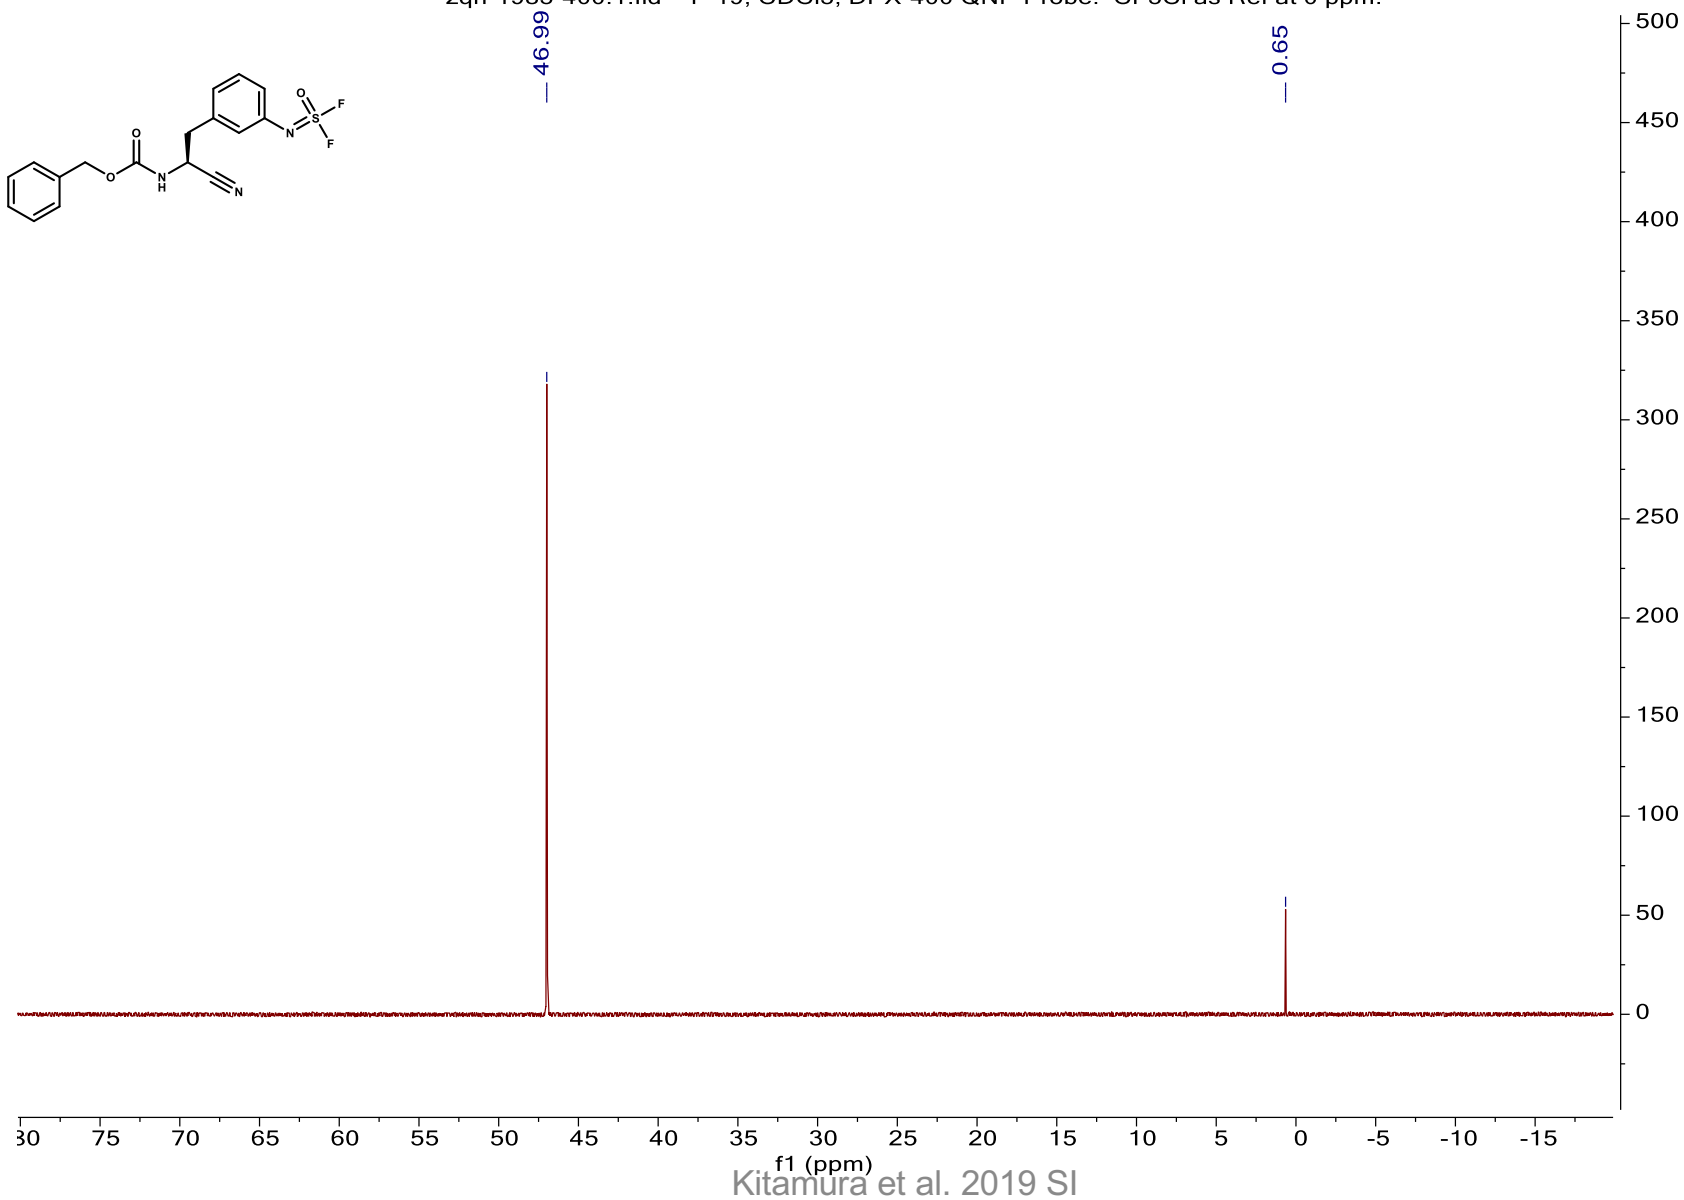

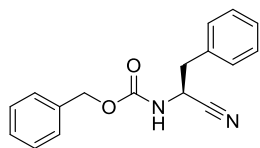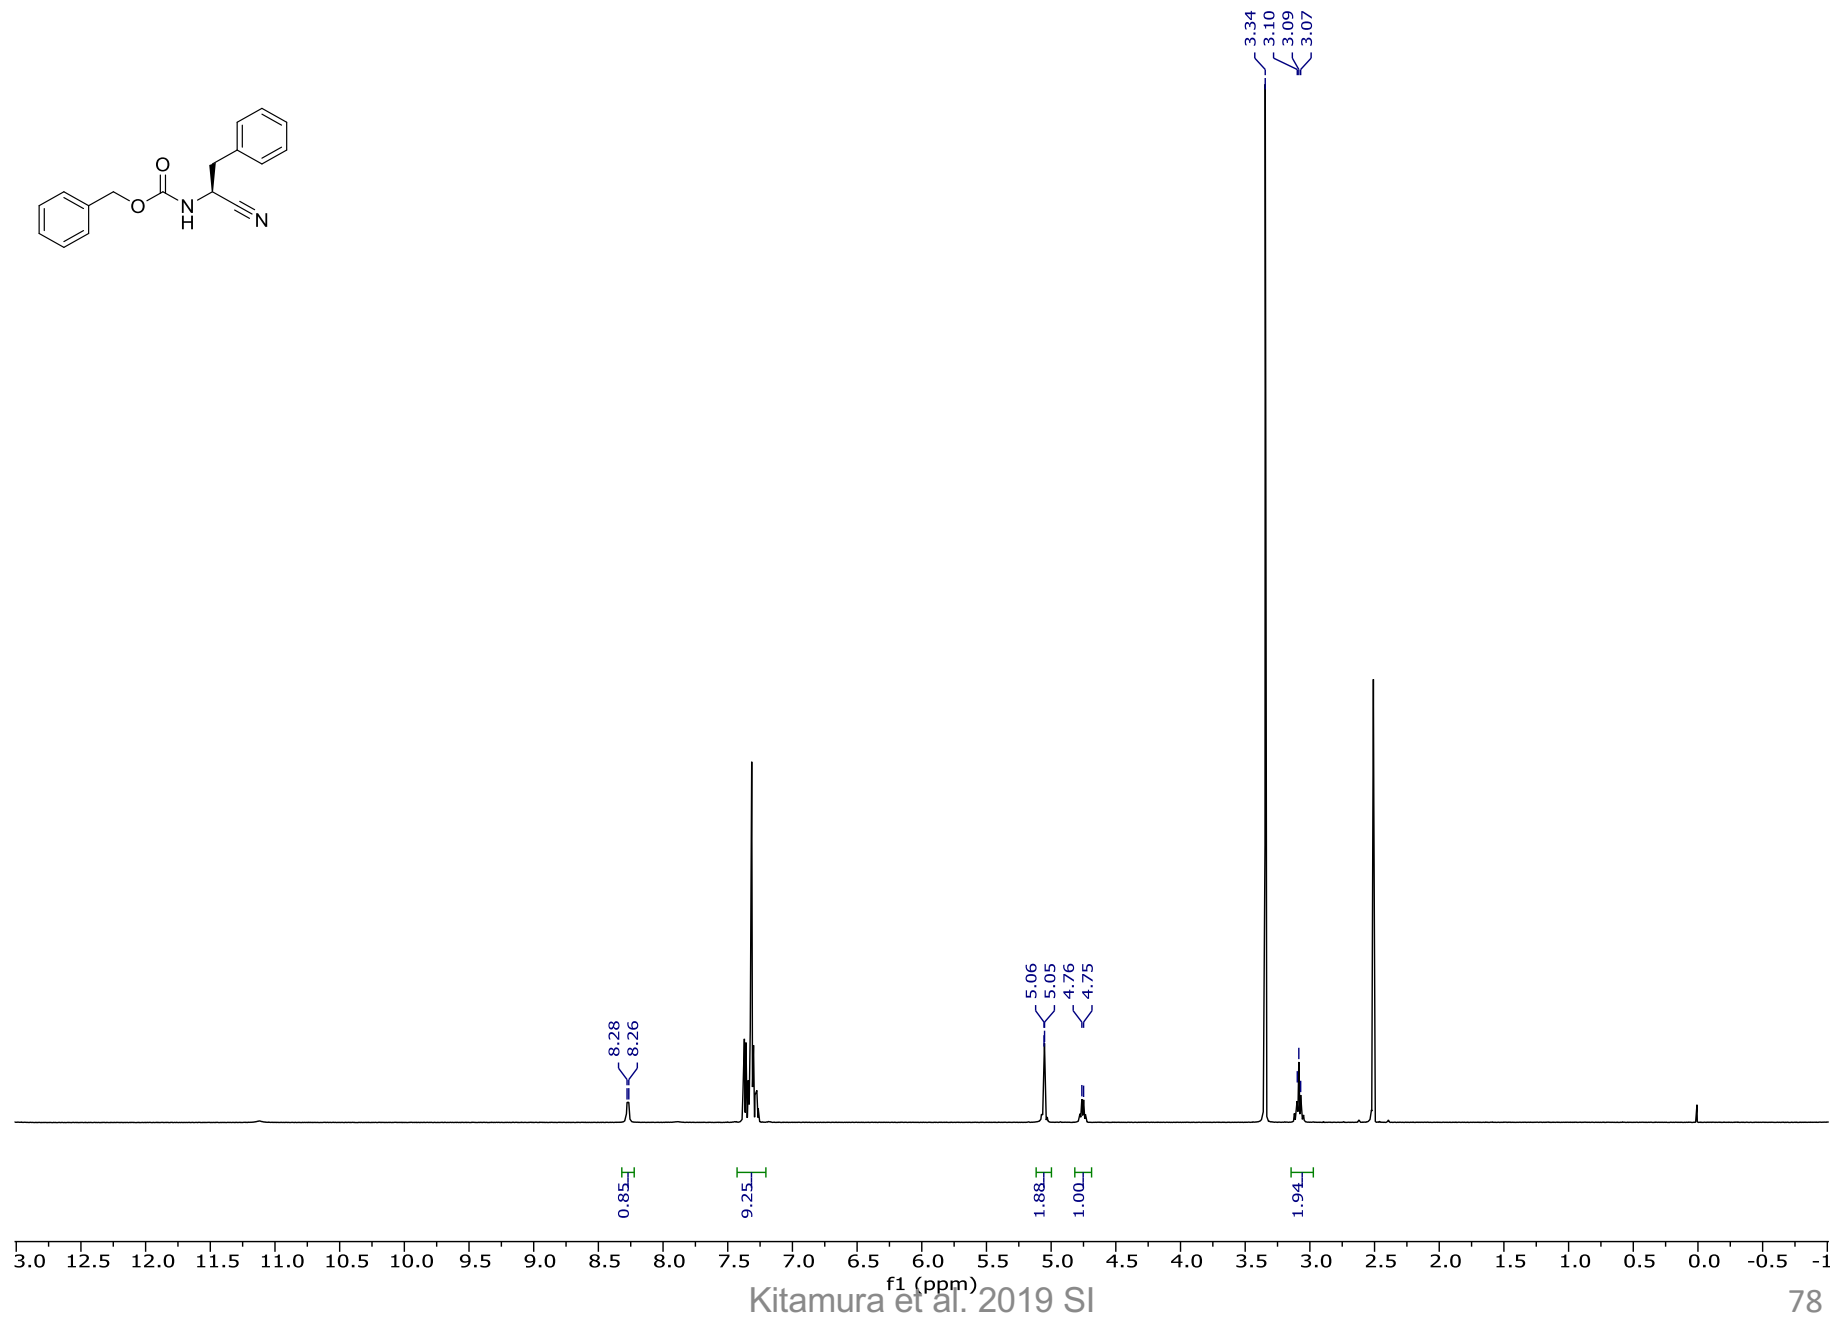

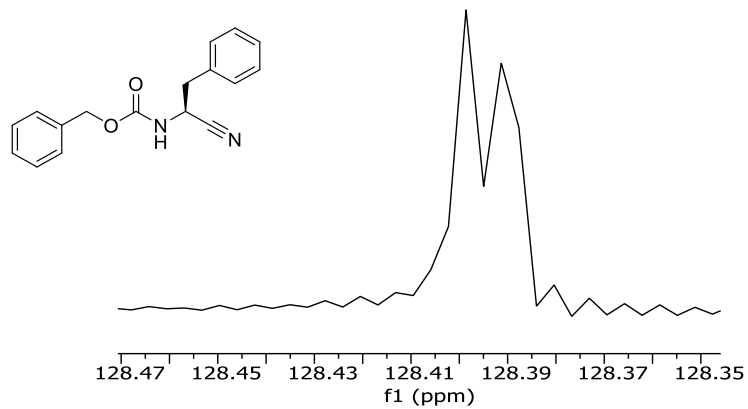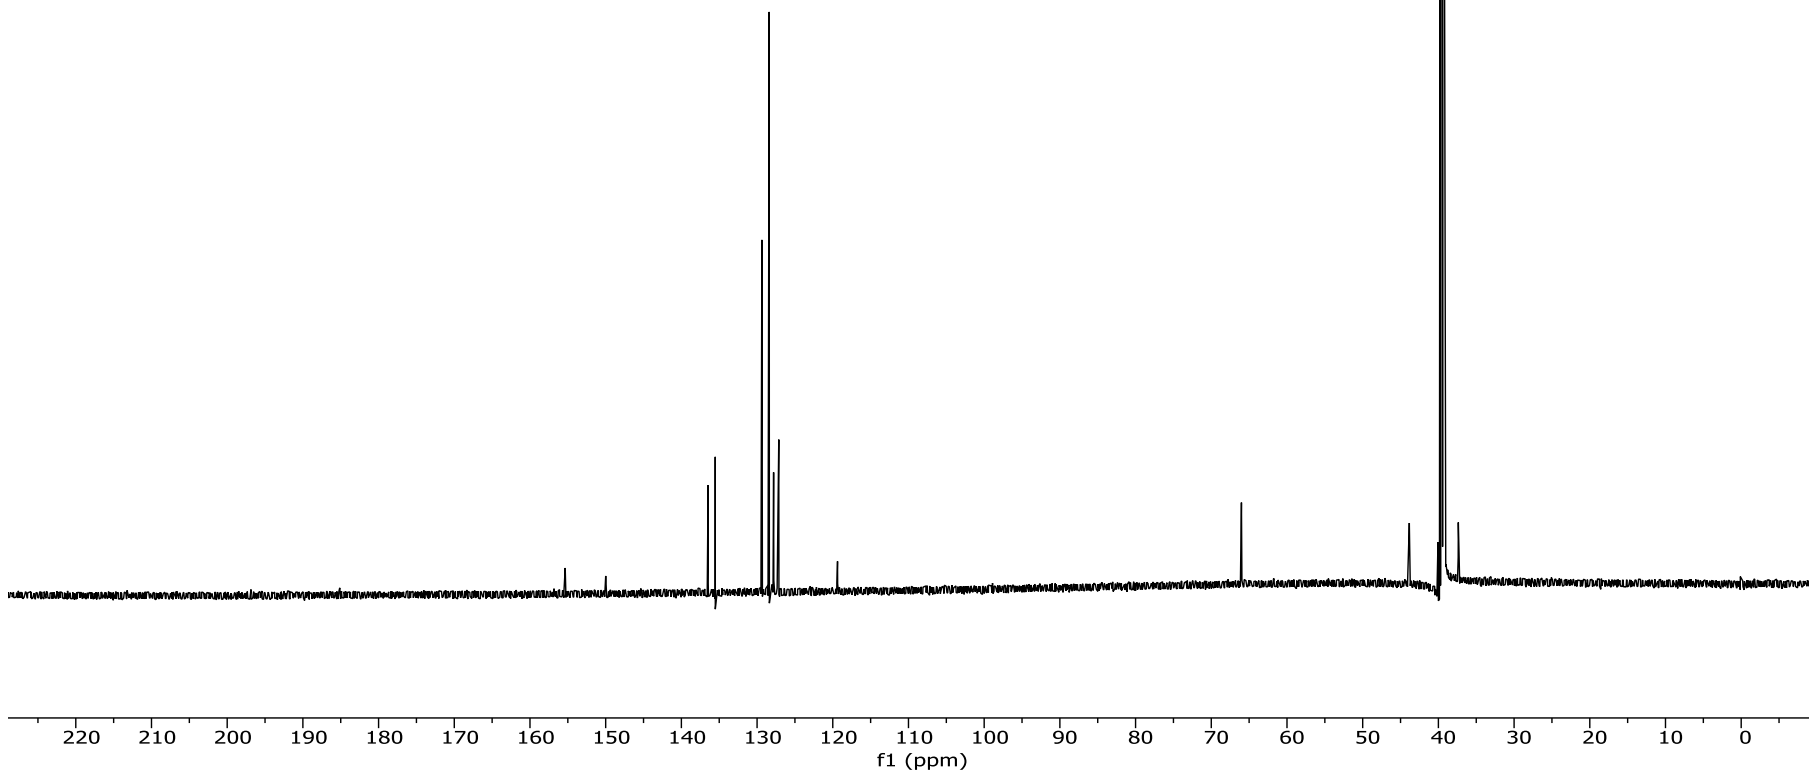

skita6002019-0510.9.fid

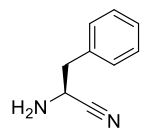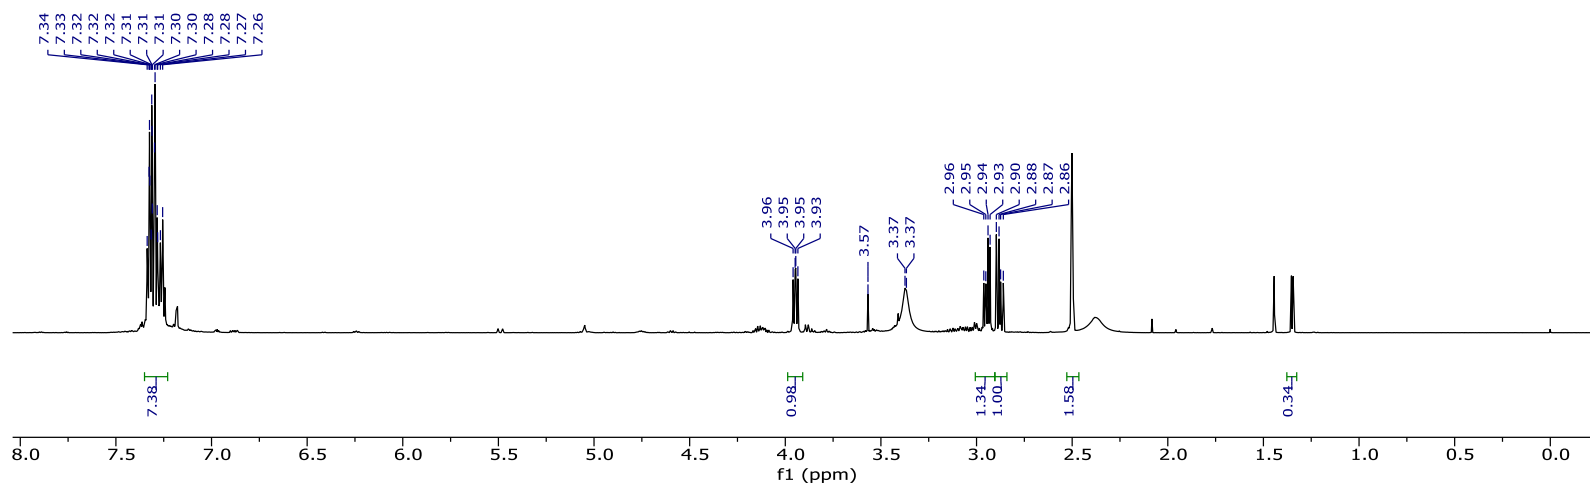



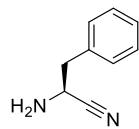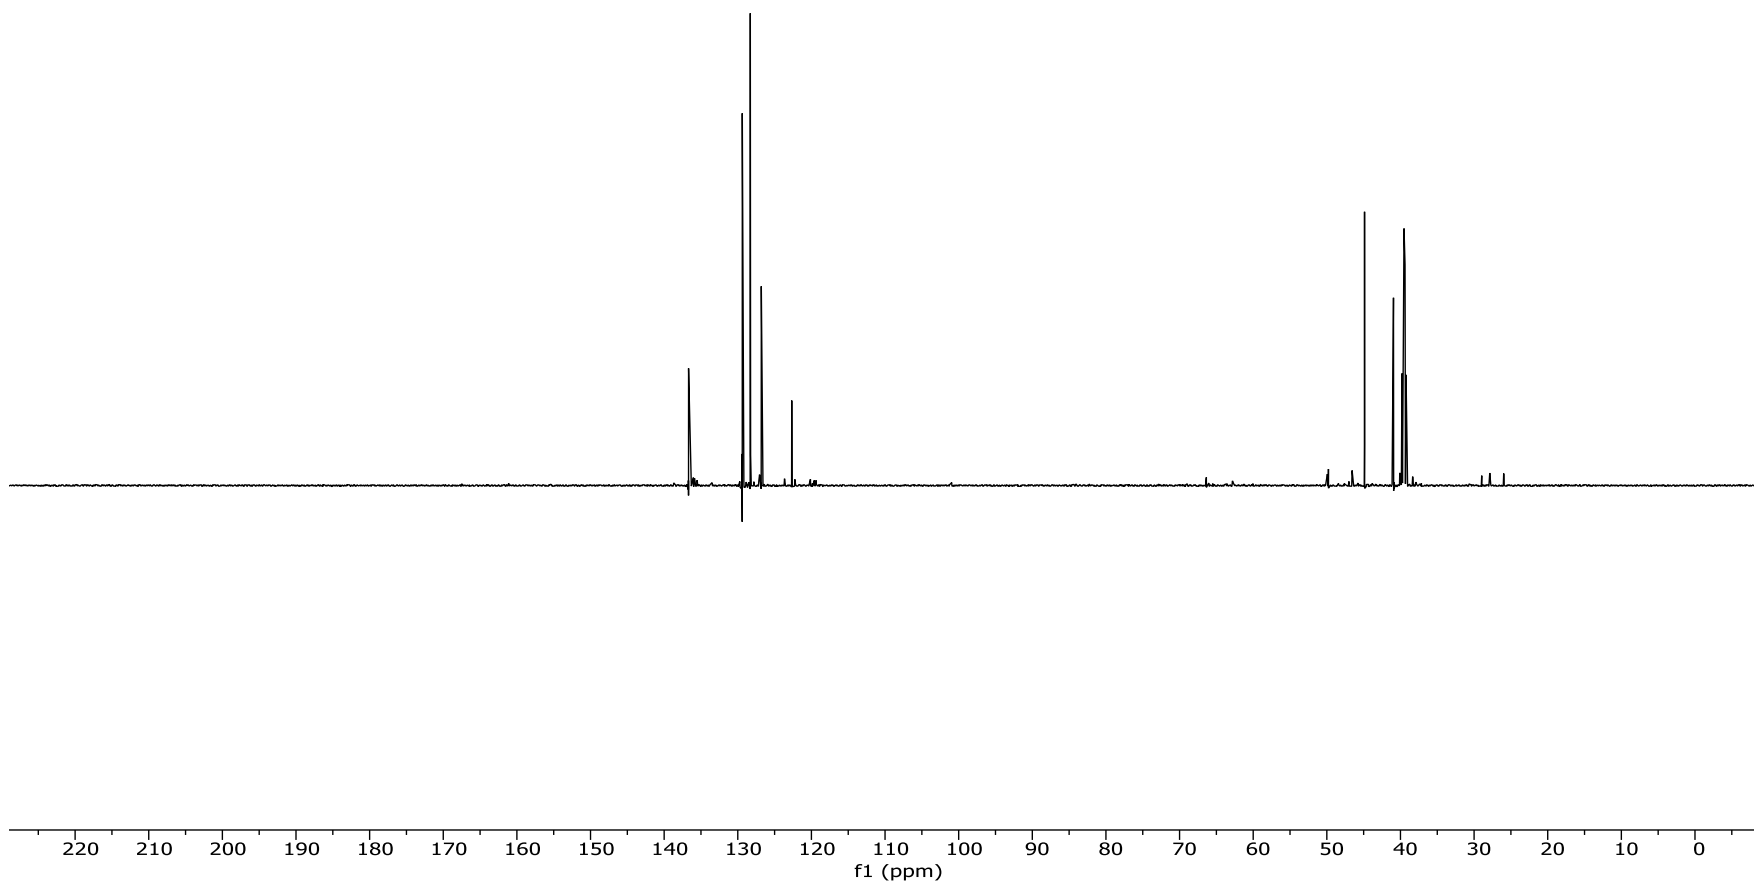

skita6002019-0510.1.fid

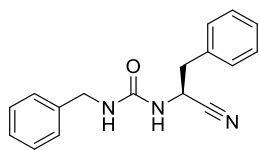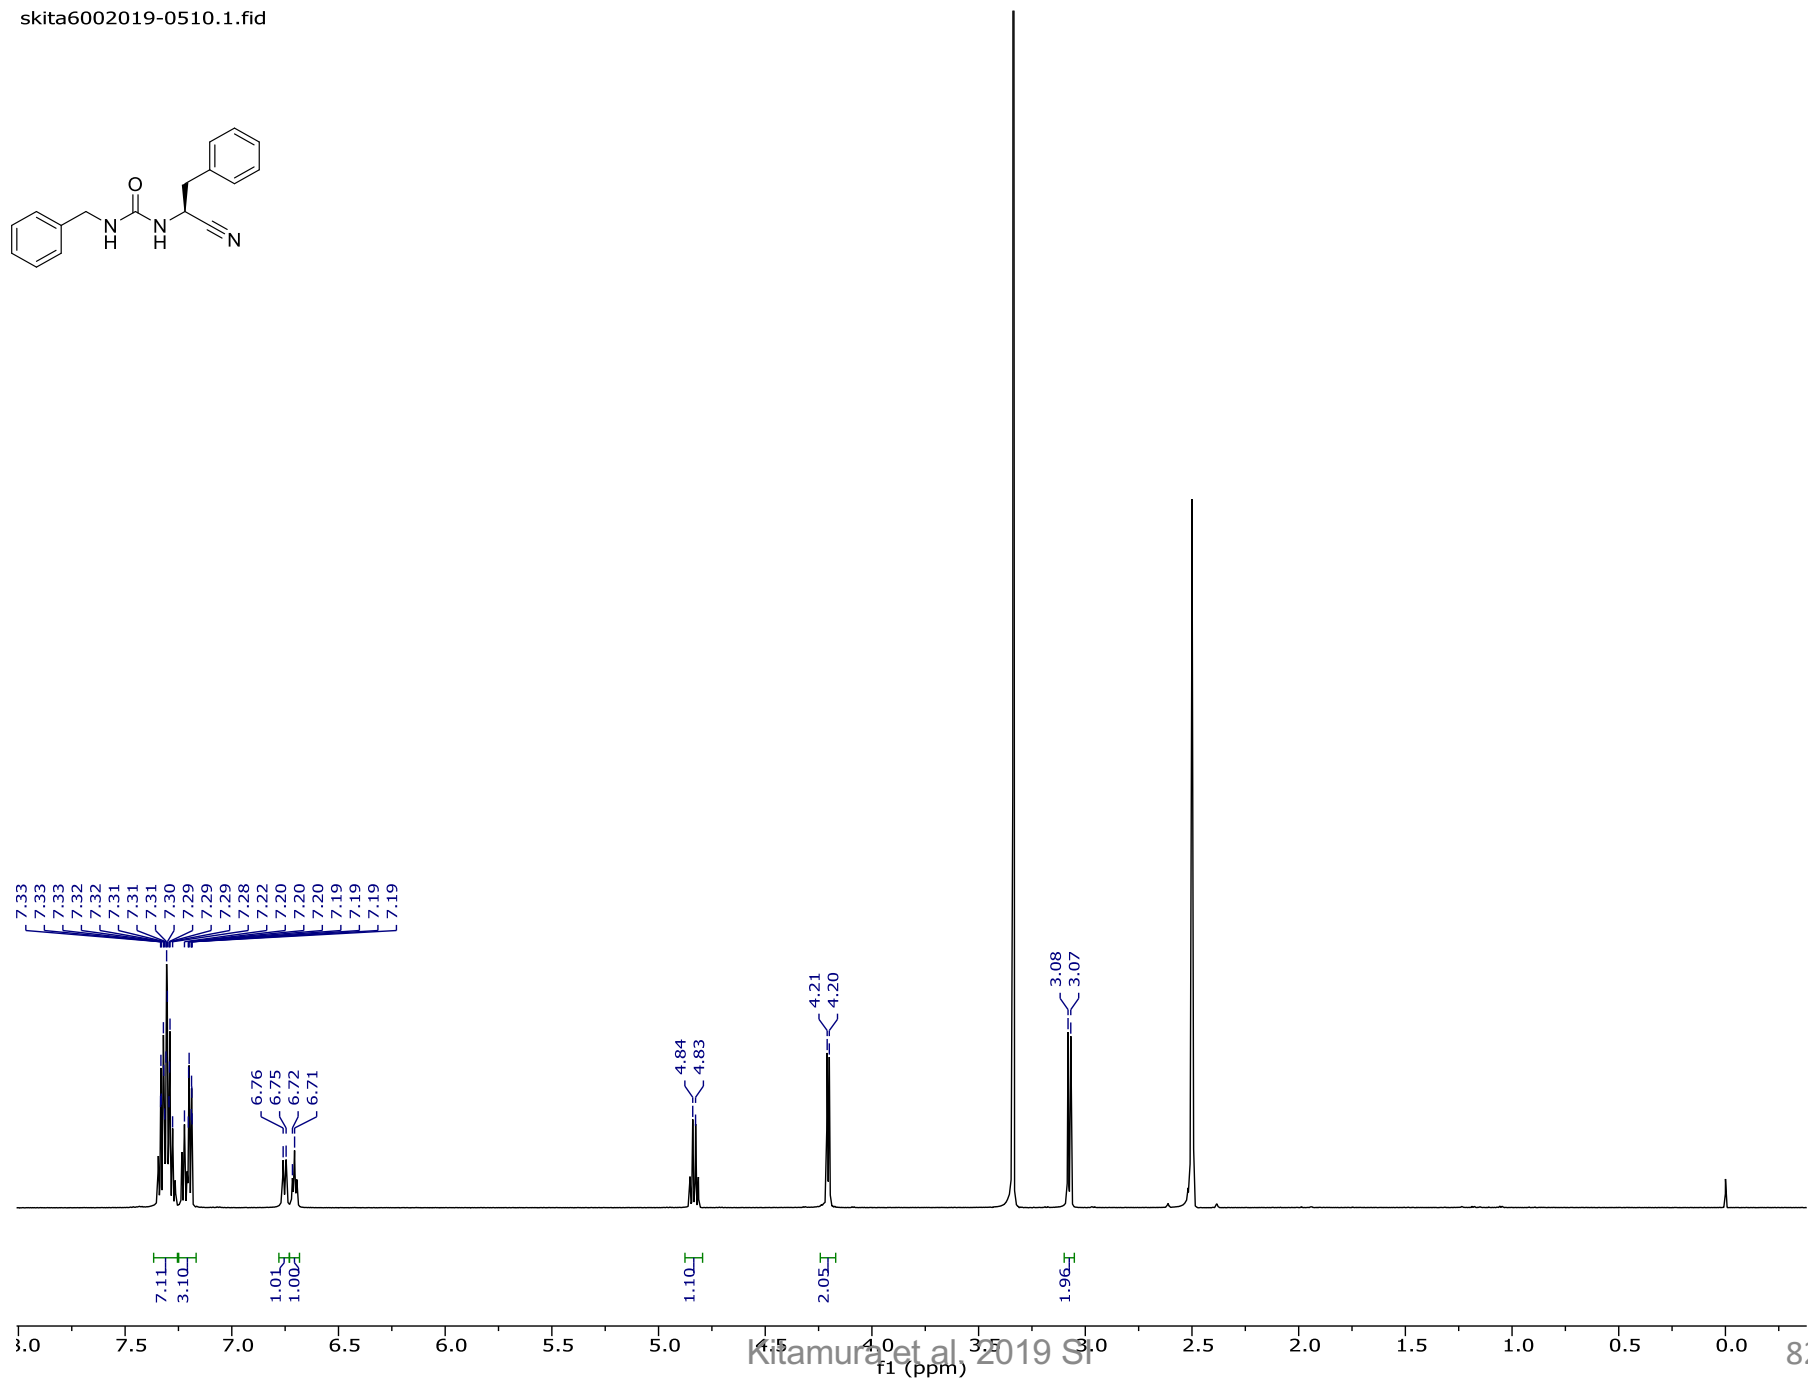

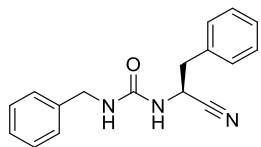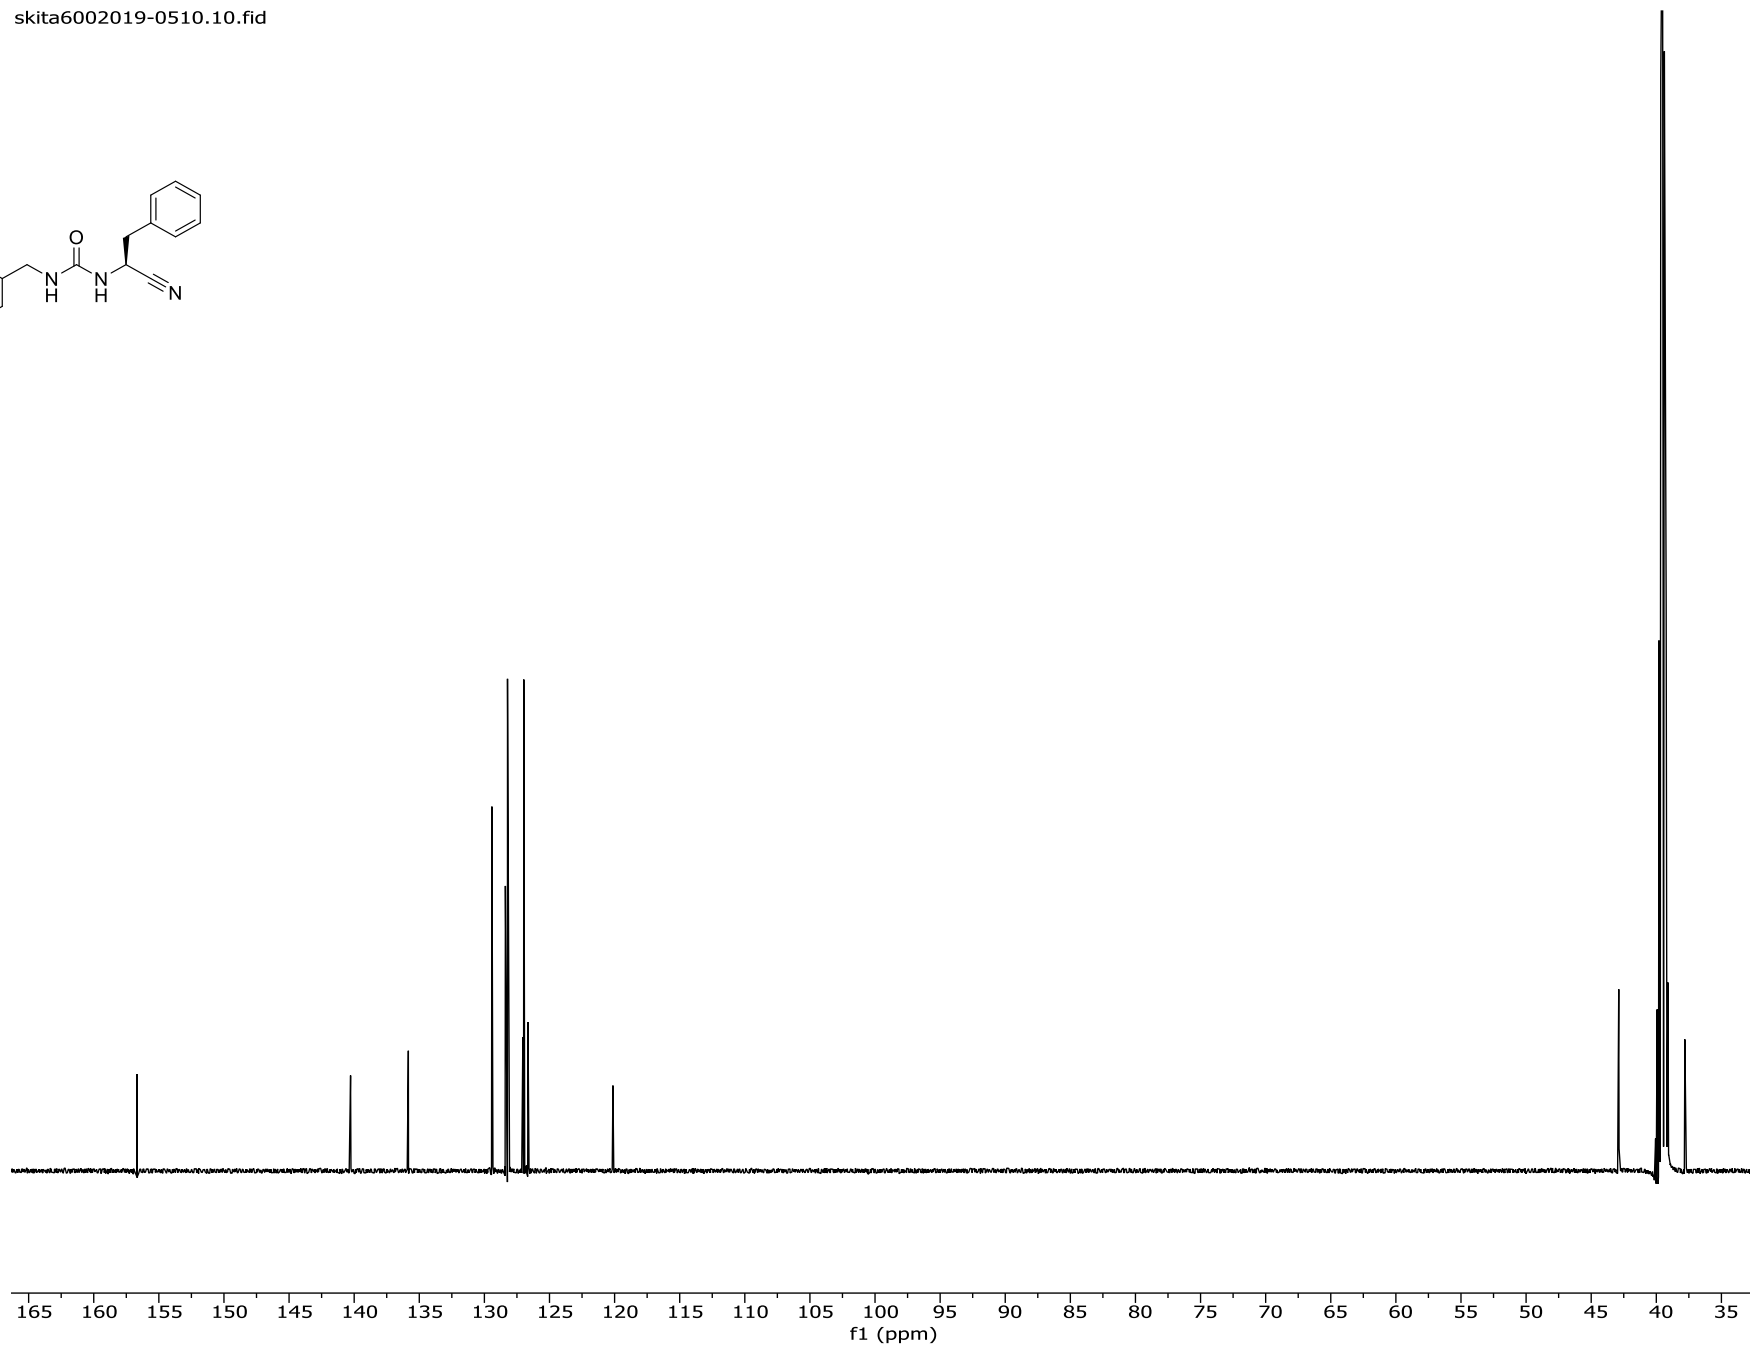

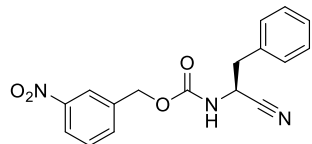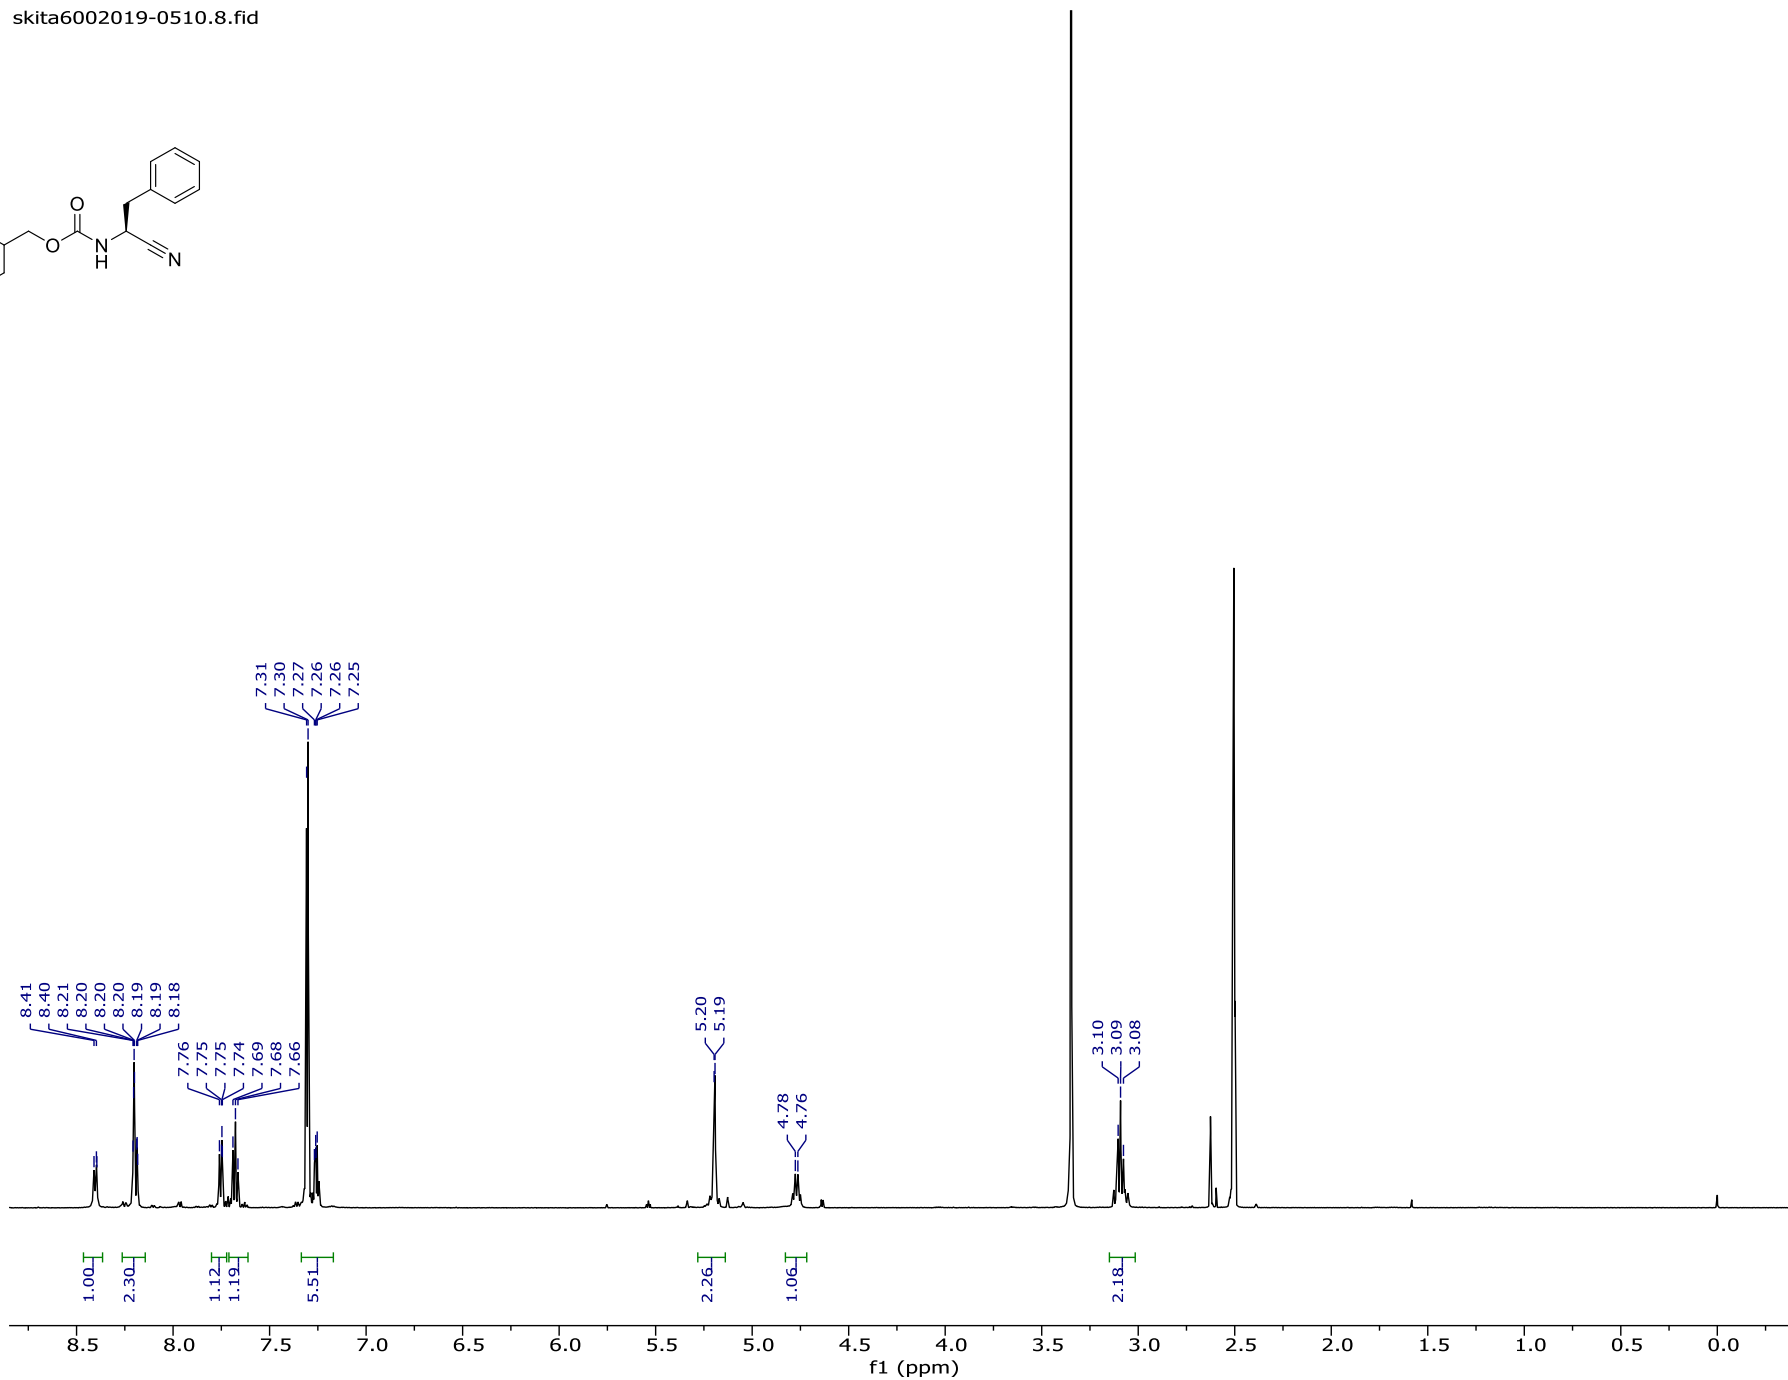

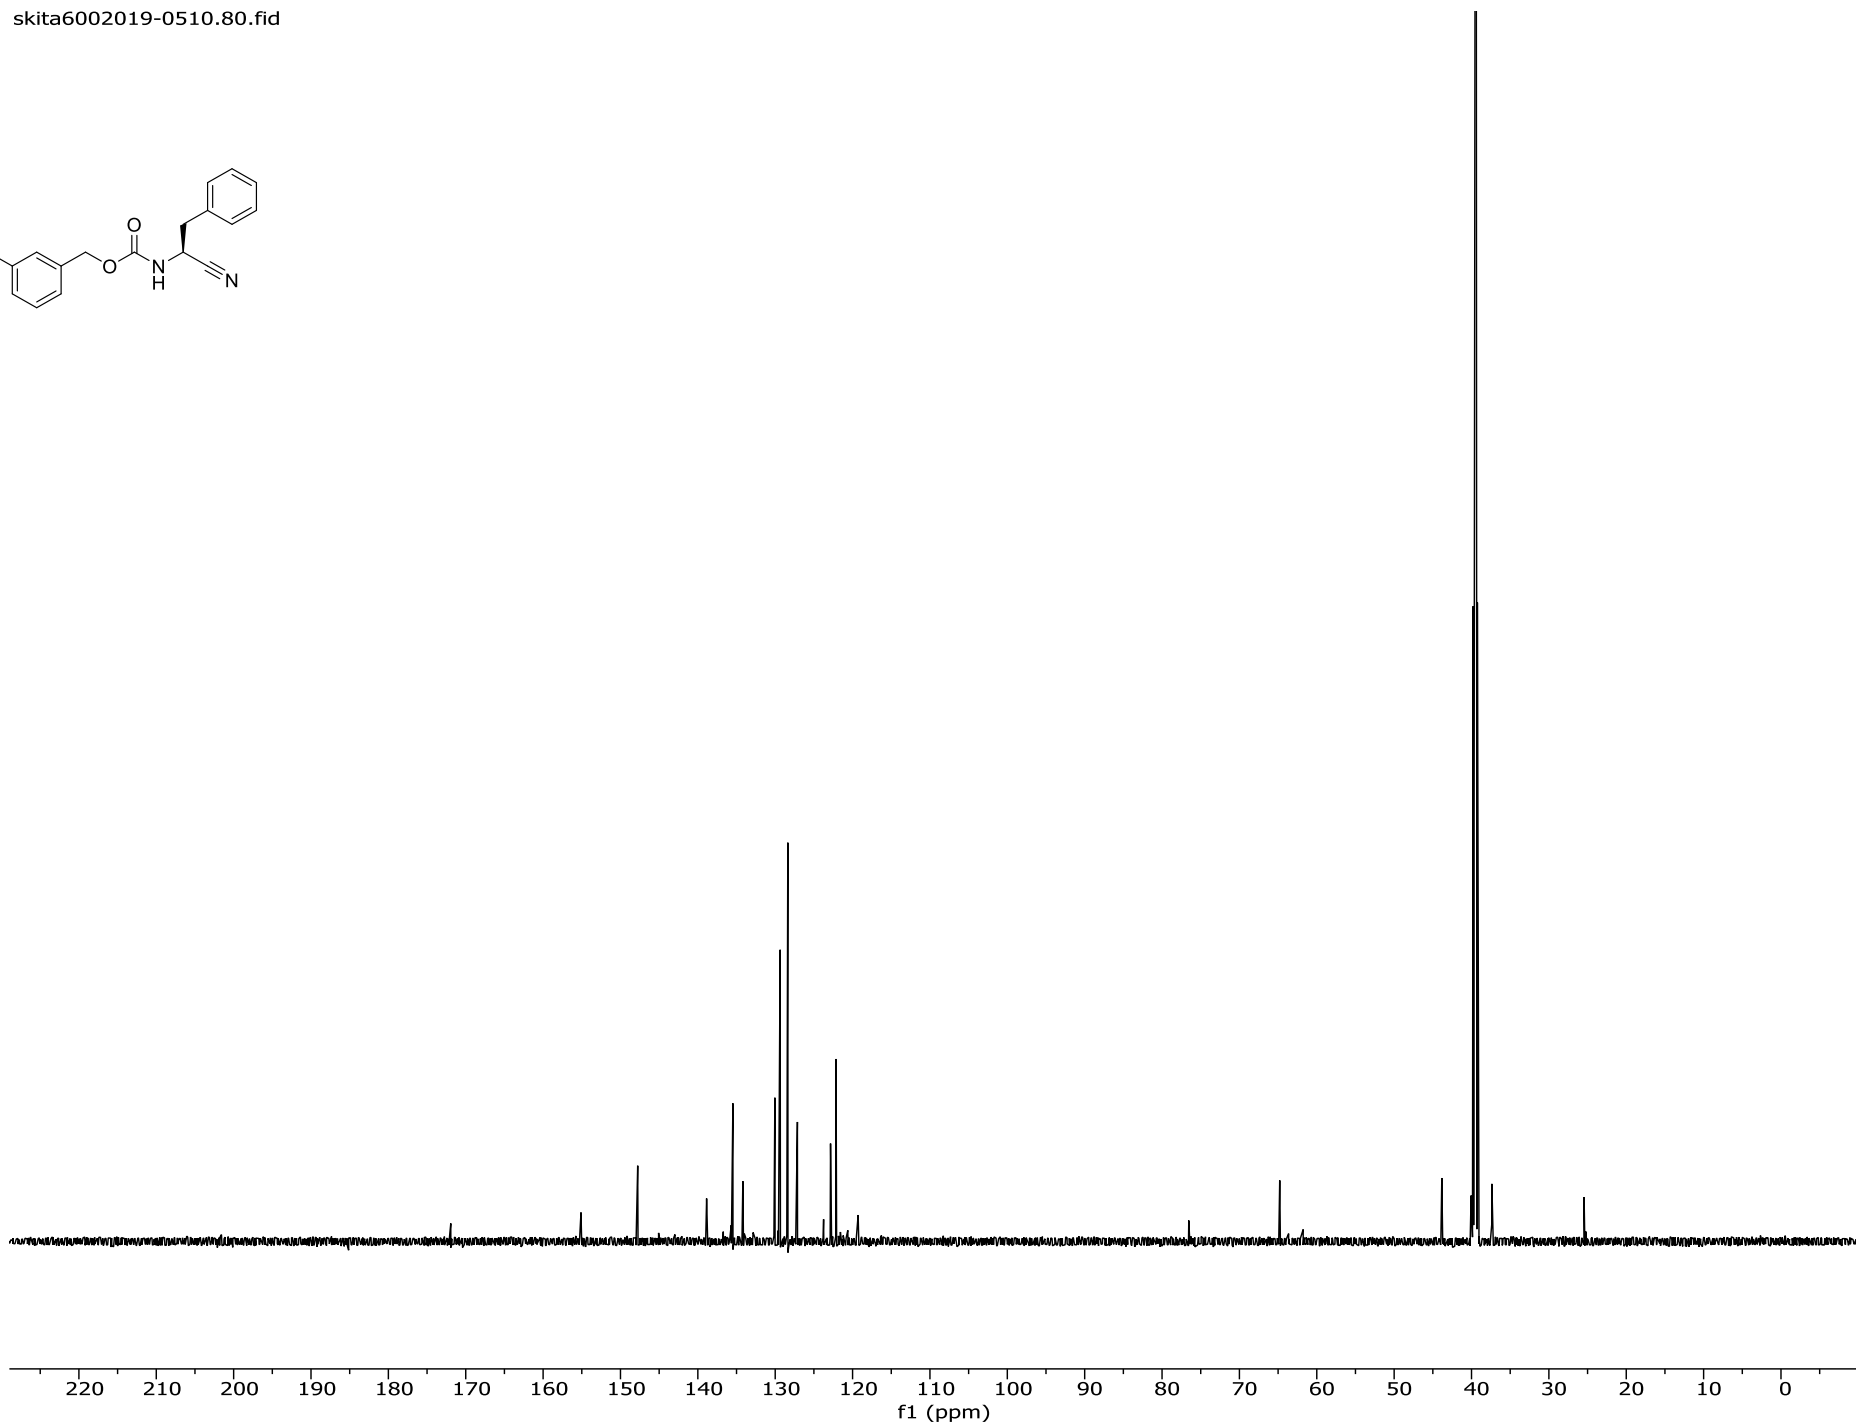

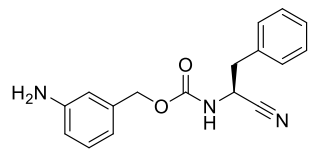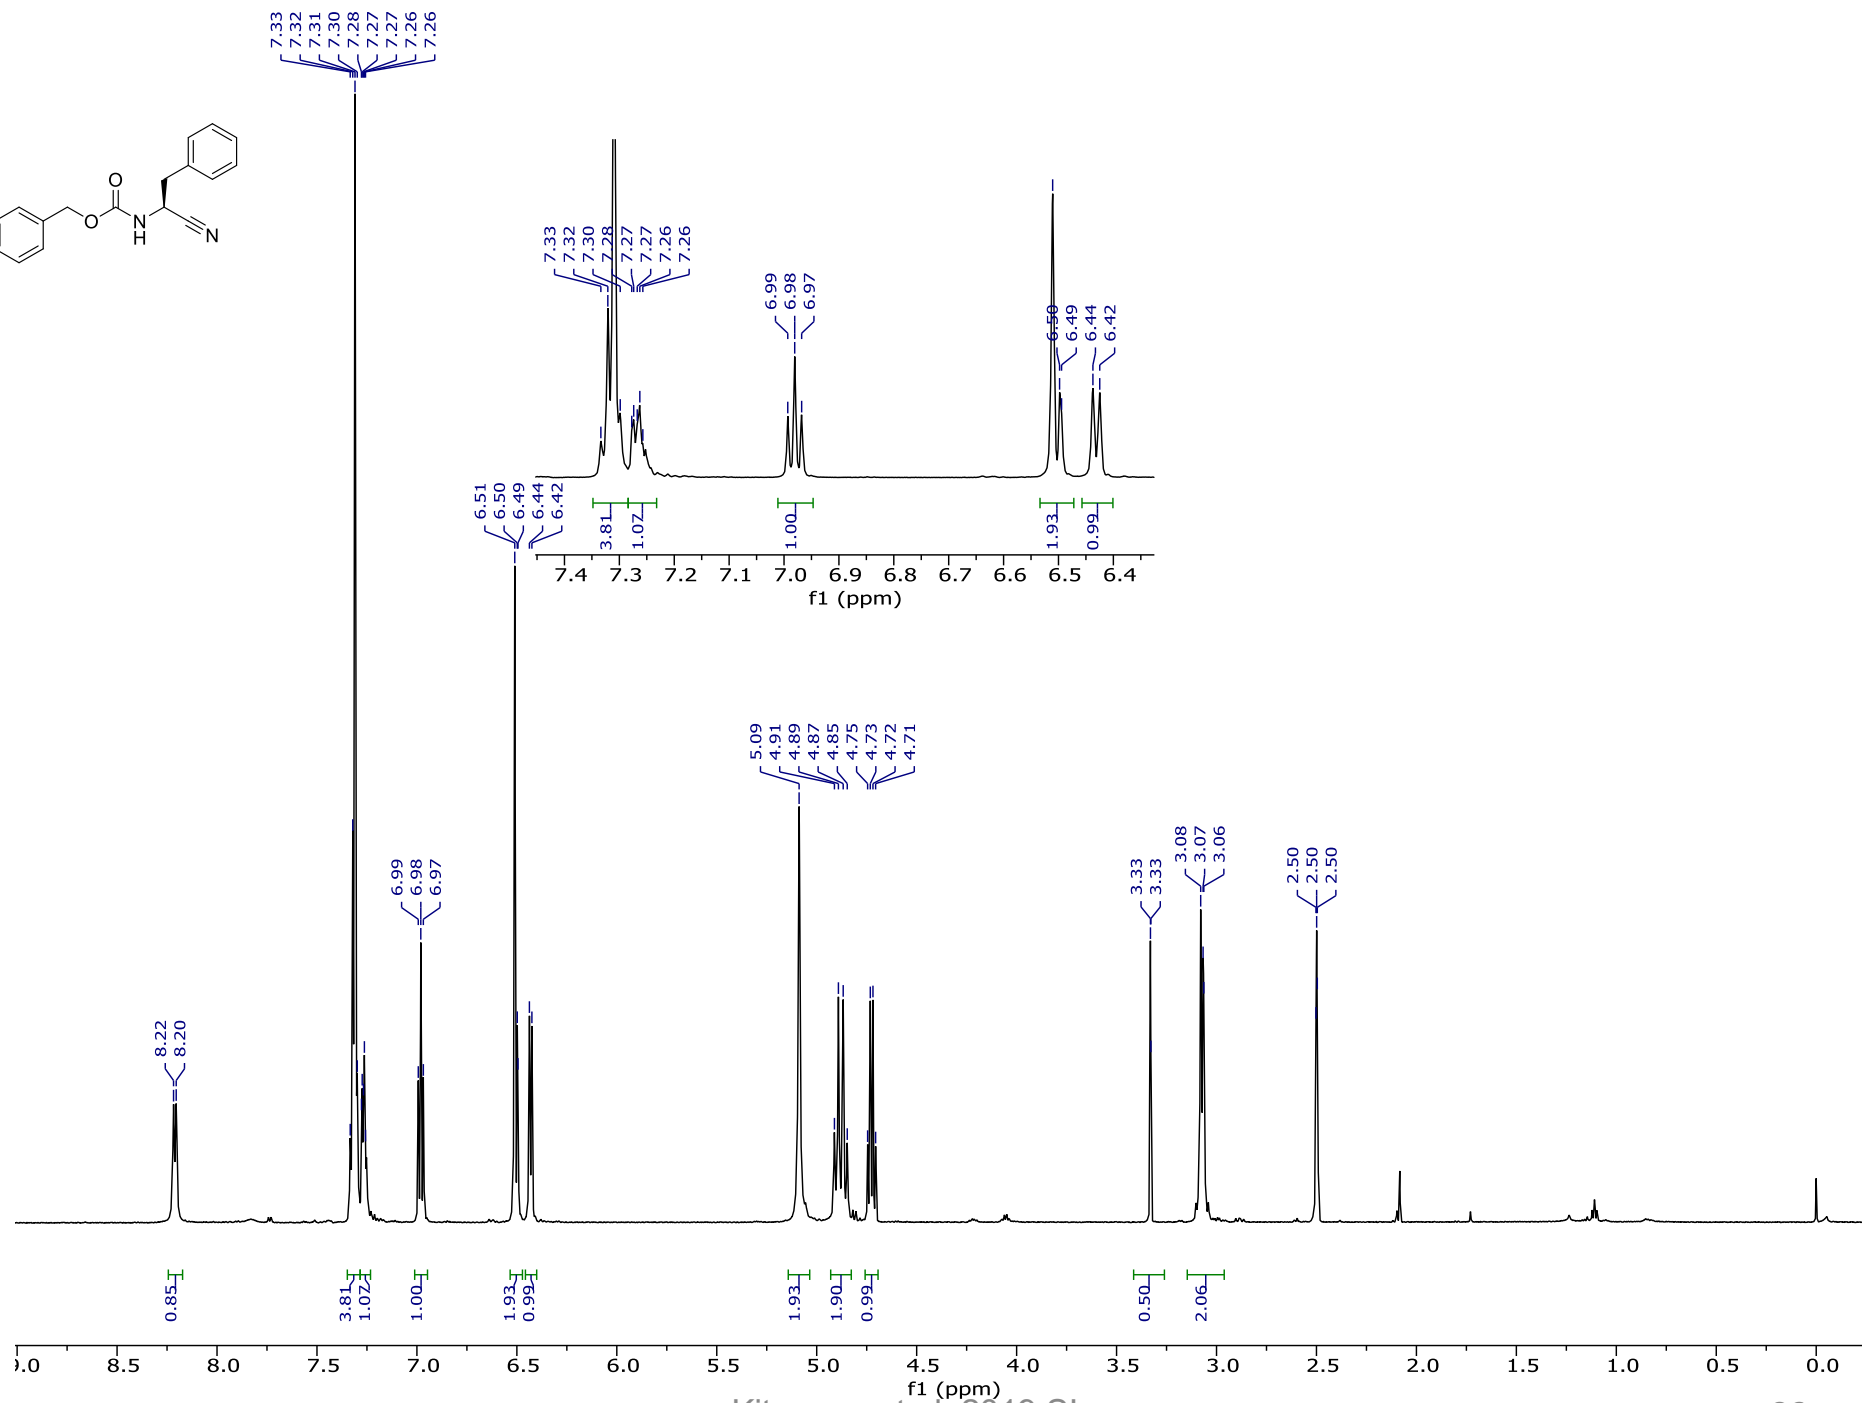

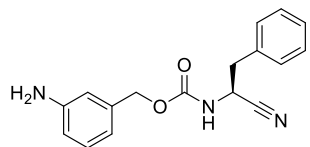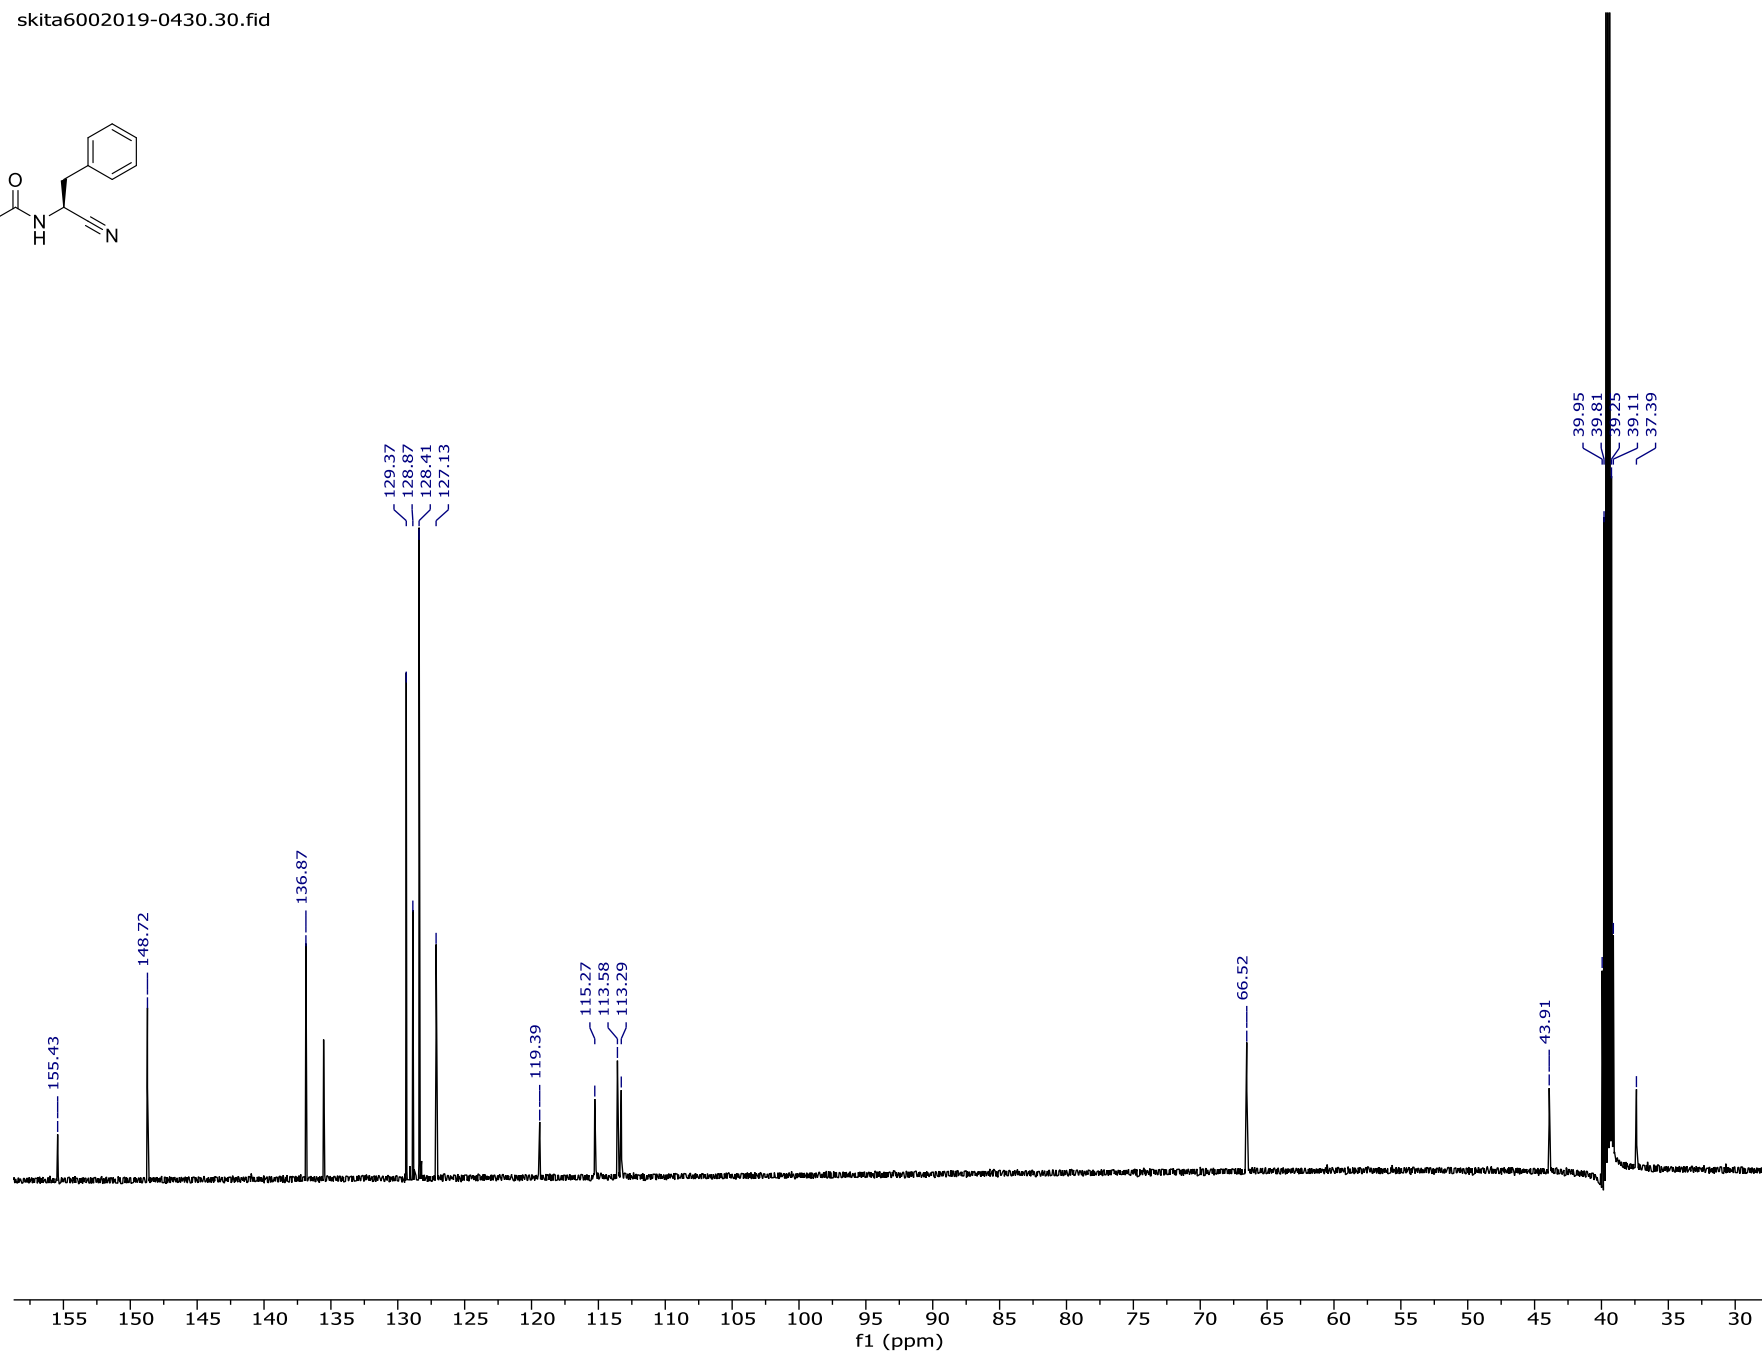

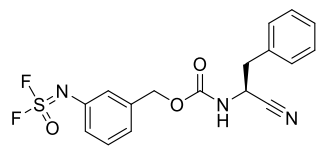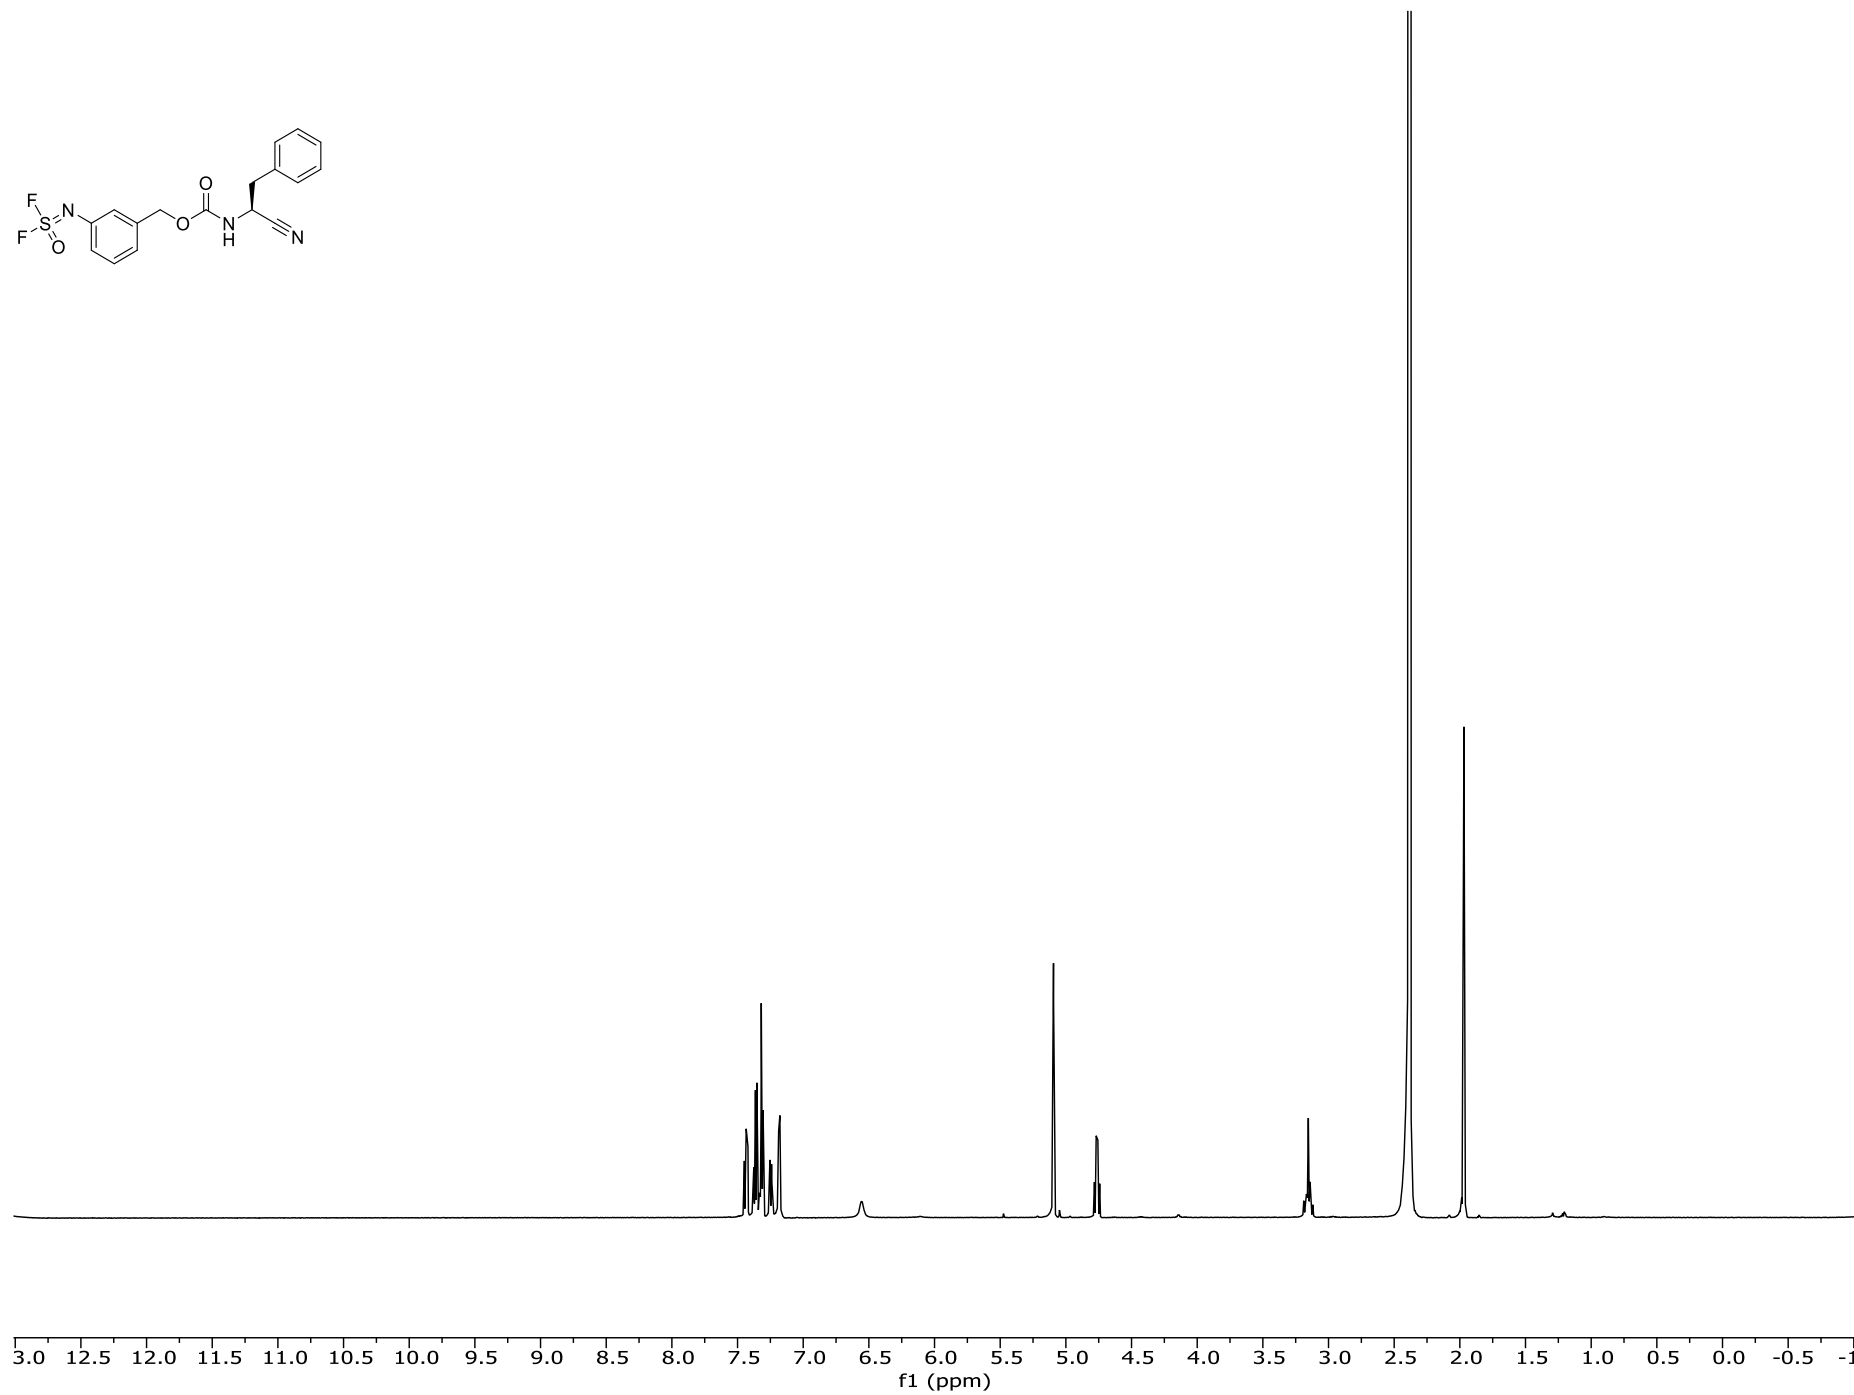



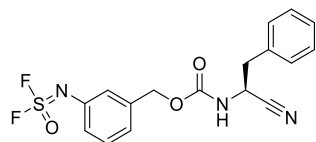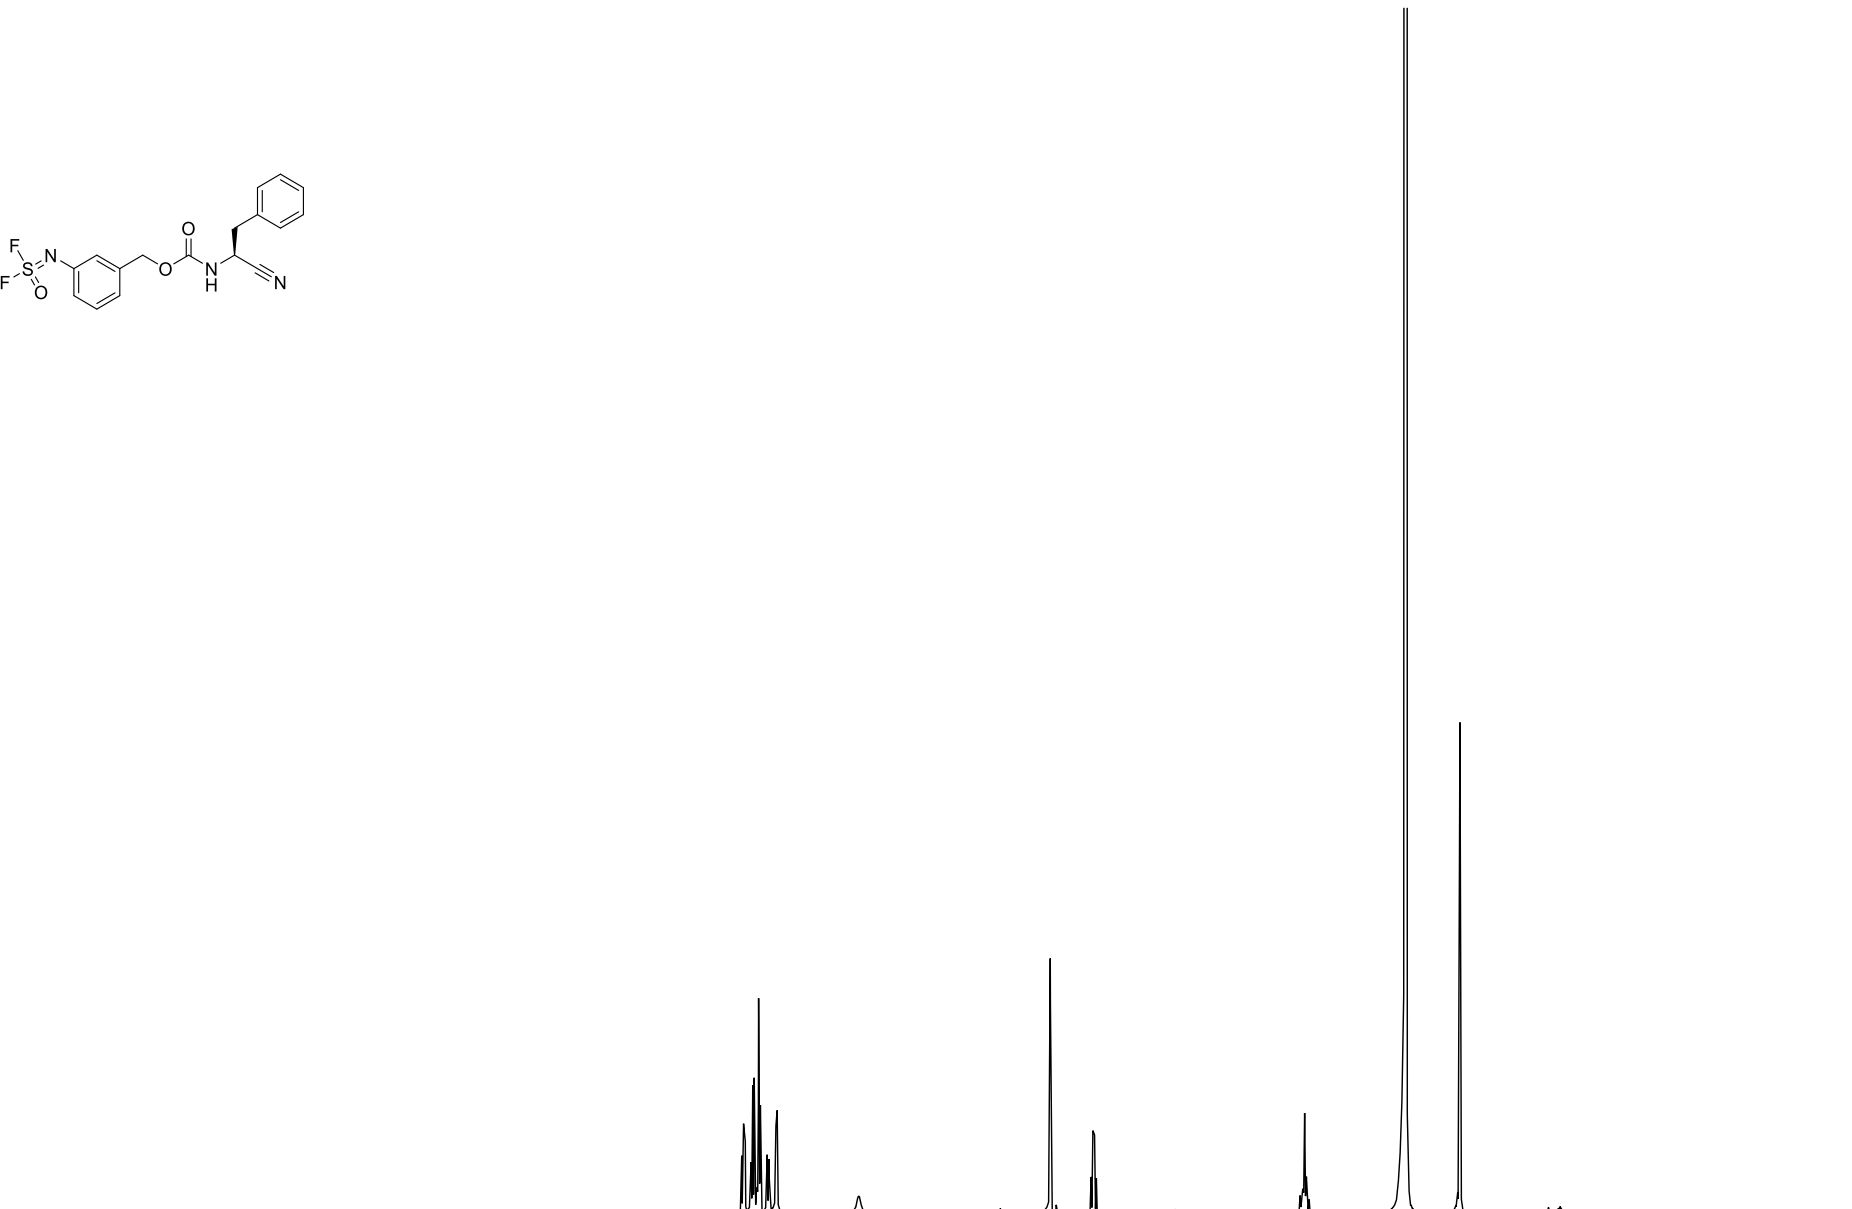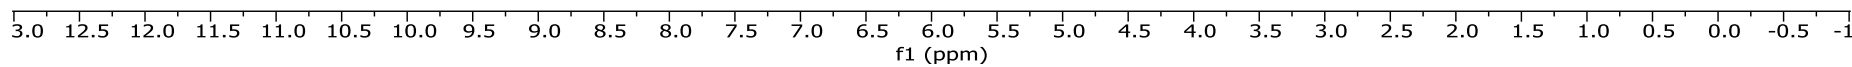

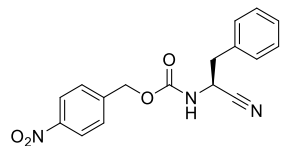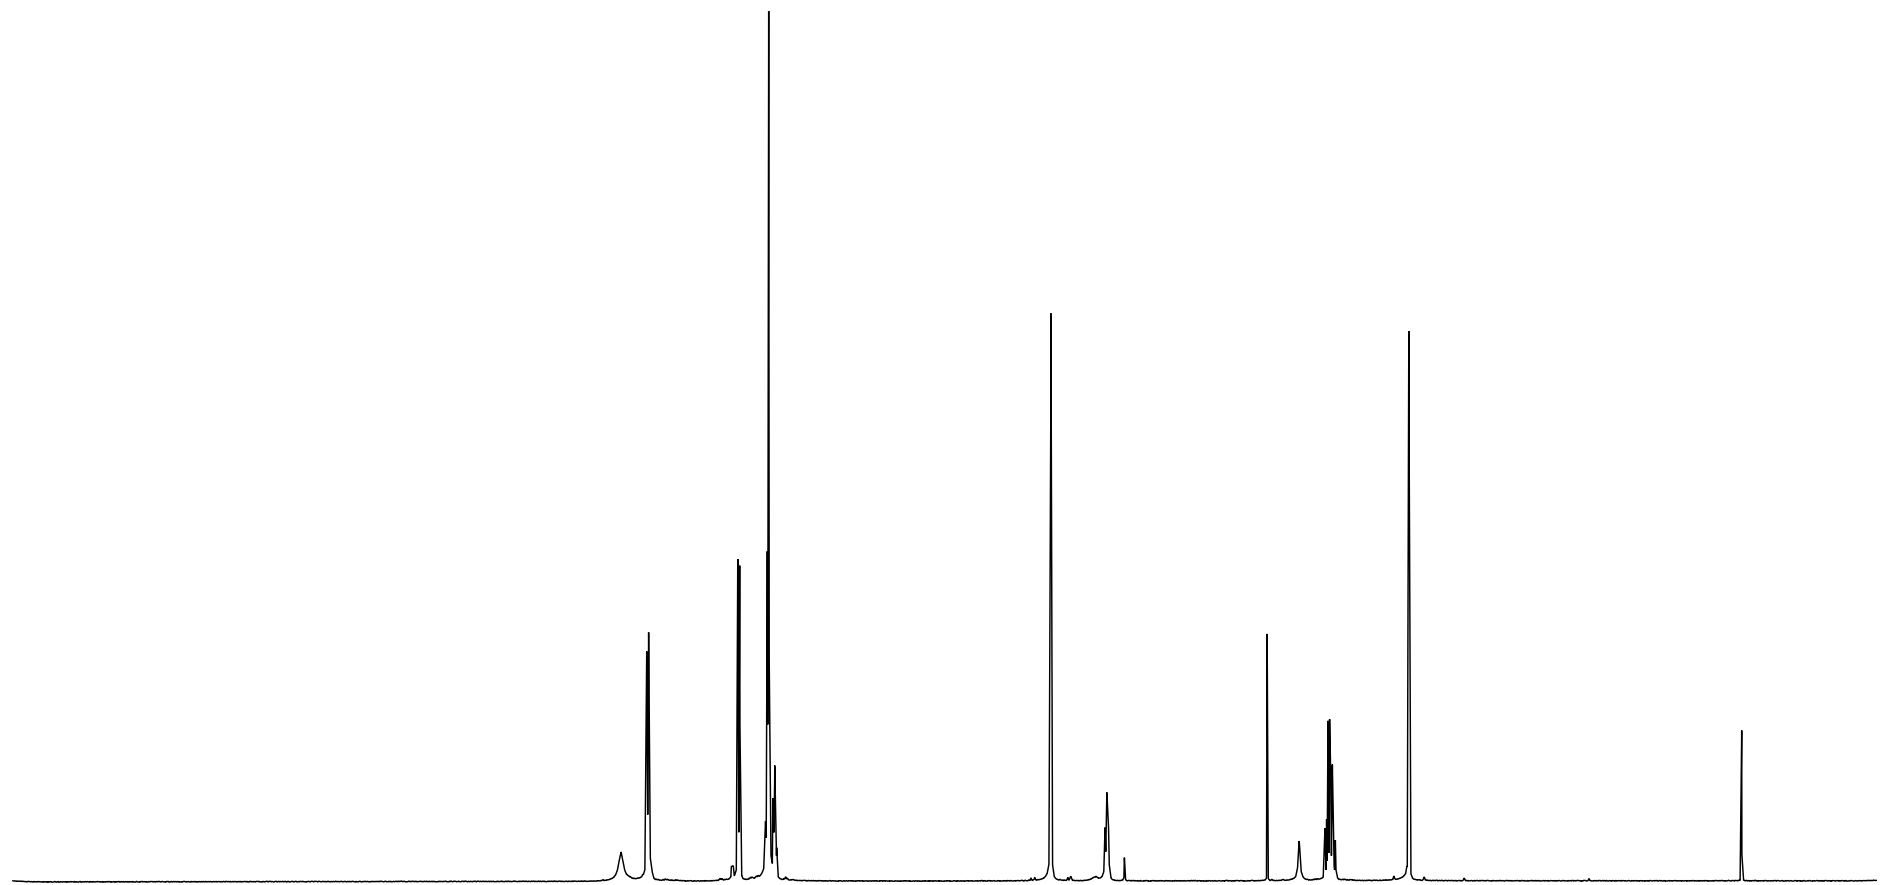

3.0 12.5 12.0 11.5 11.0 10.5 10.0 9.5 9.0 8.5 8.0 7.5 7.0 6.5 6.0 5.5 5.0 4.5 4.0 3.5 3.0 2.5 2.0 1.5 1.0 0.5 0.0 -0.5 -1

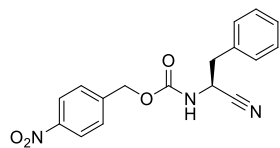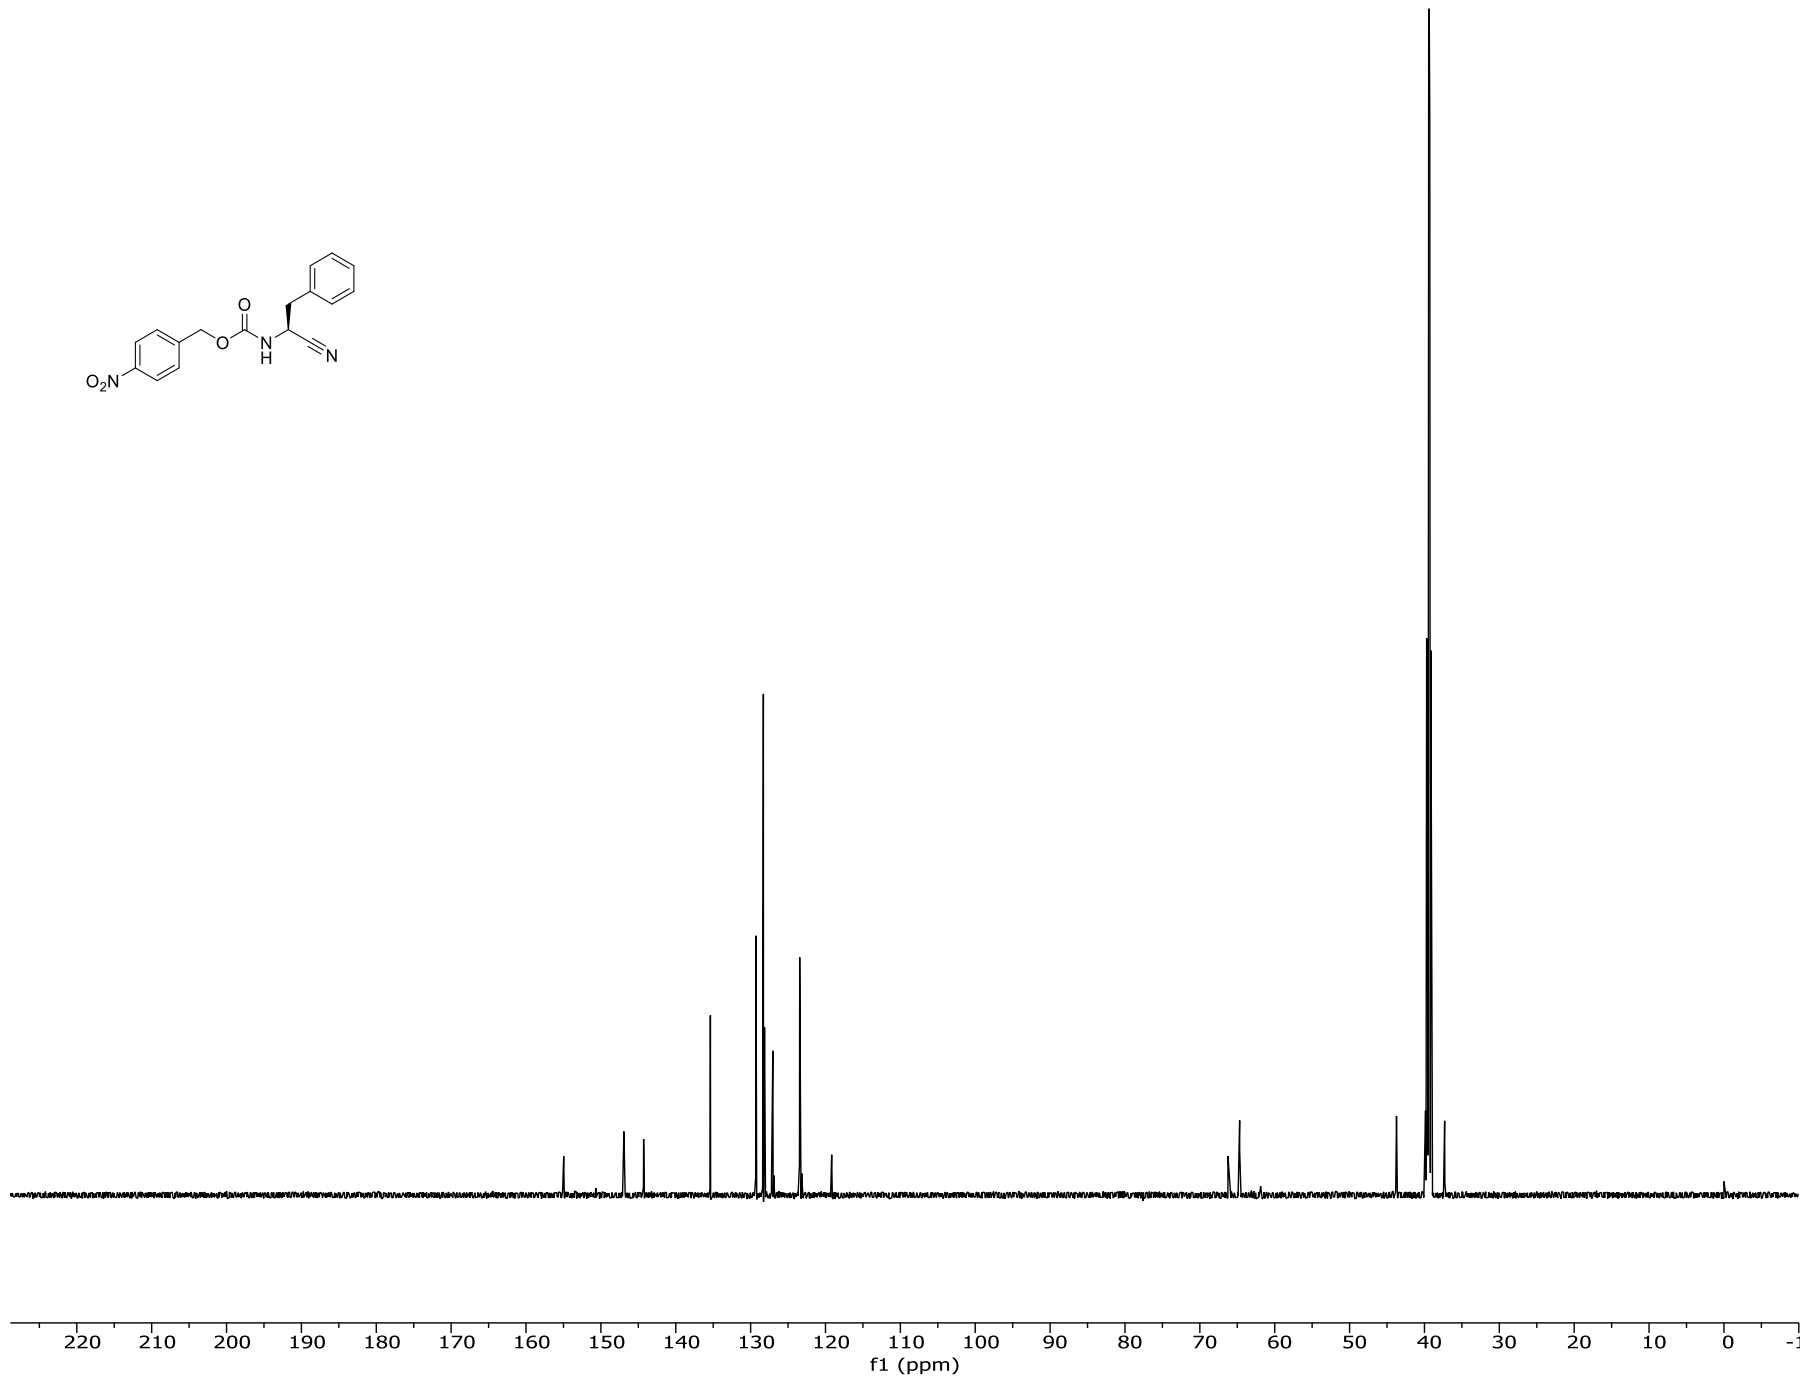

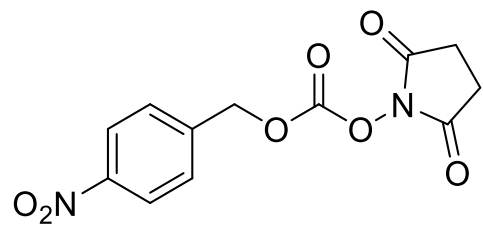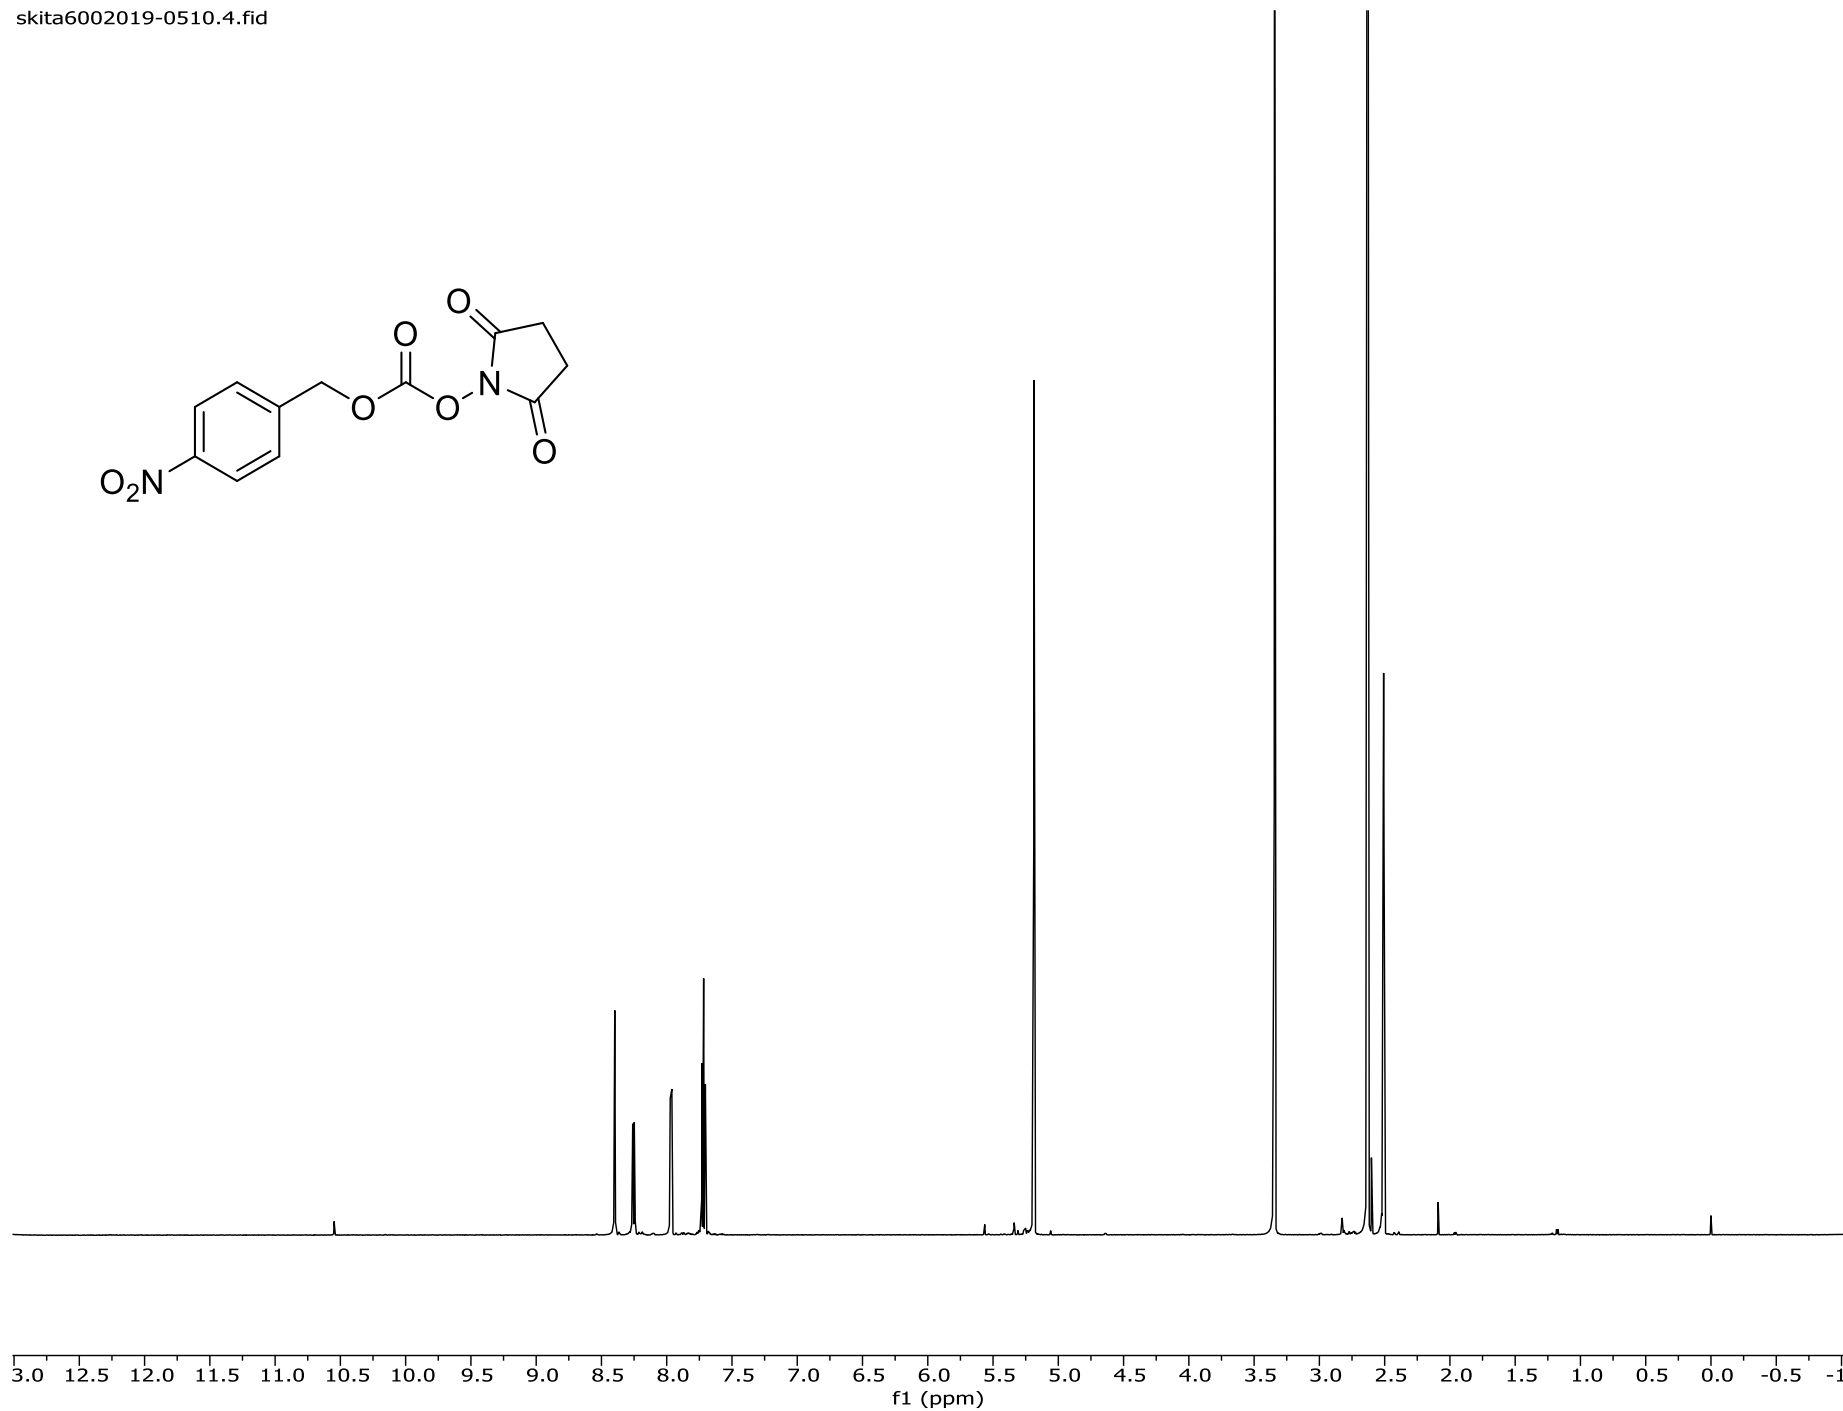

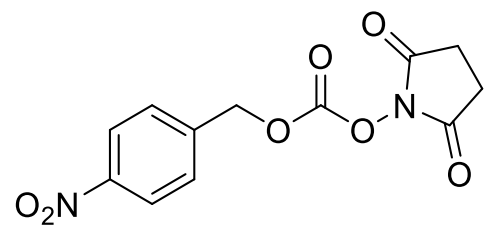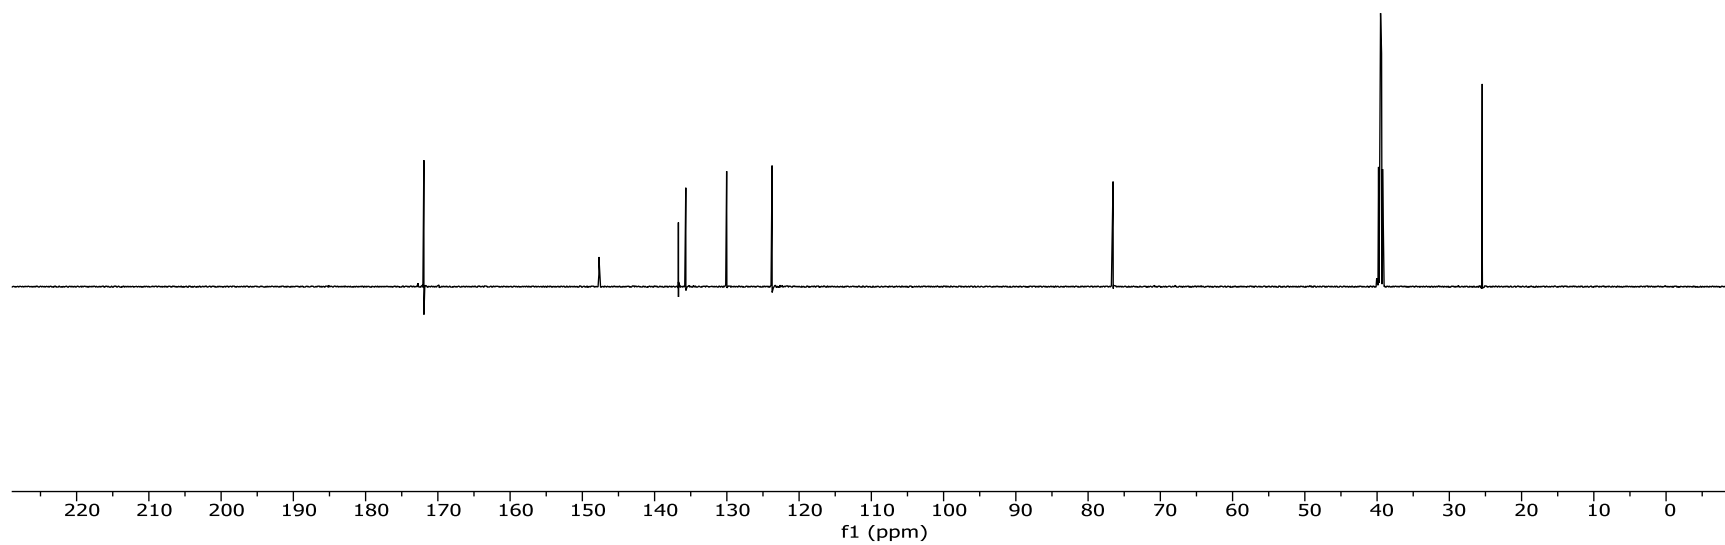

# Supplementary Data

## LC-CAD trace of the SuFEx reaction

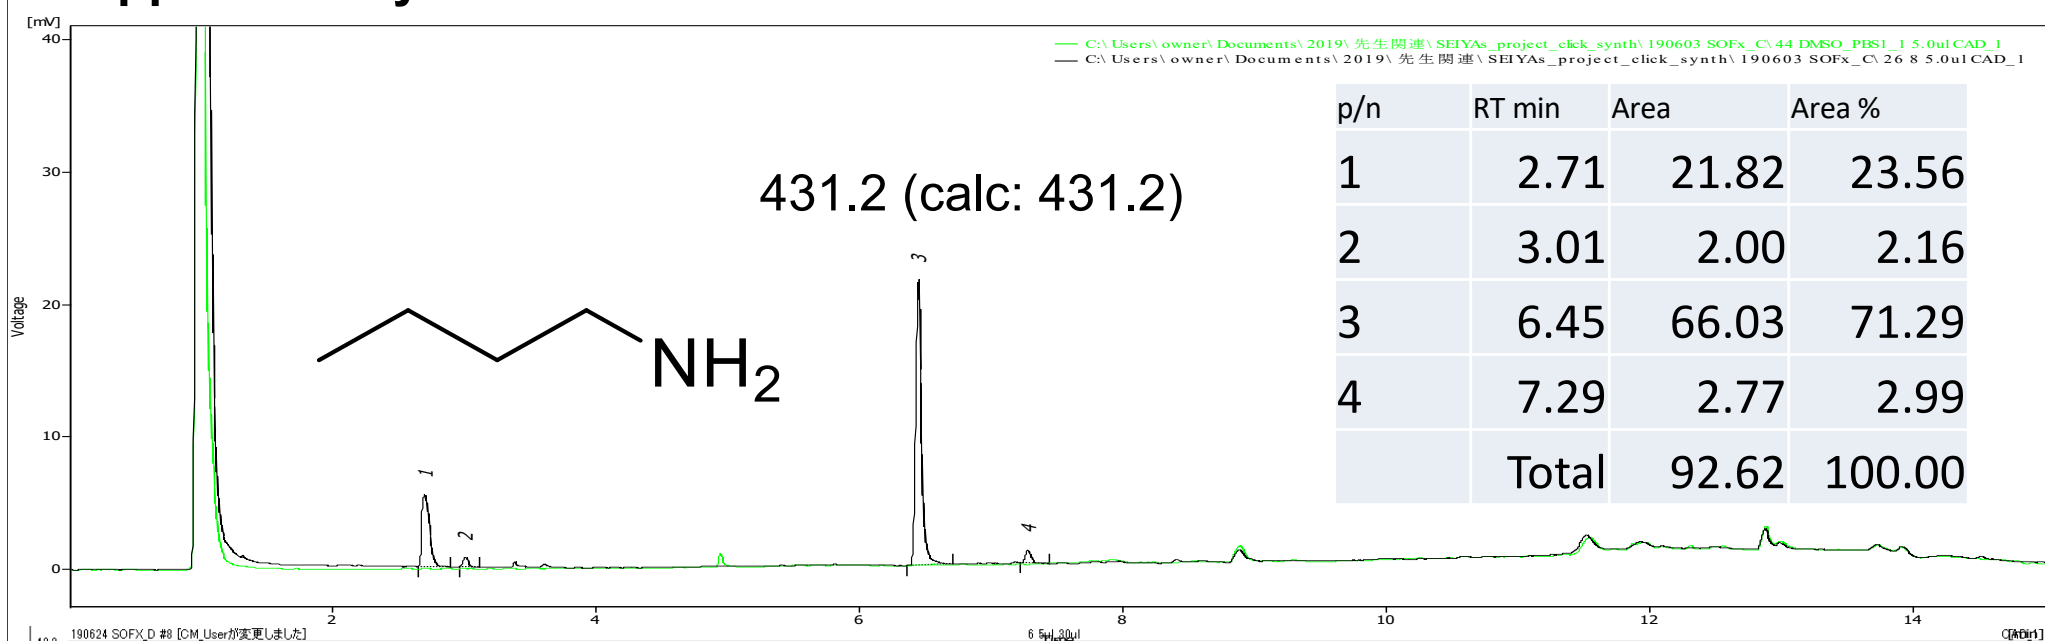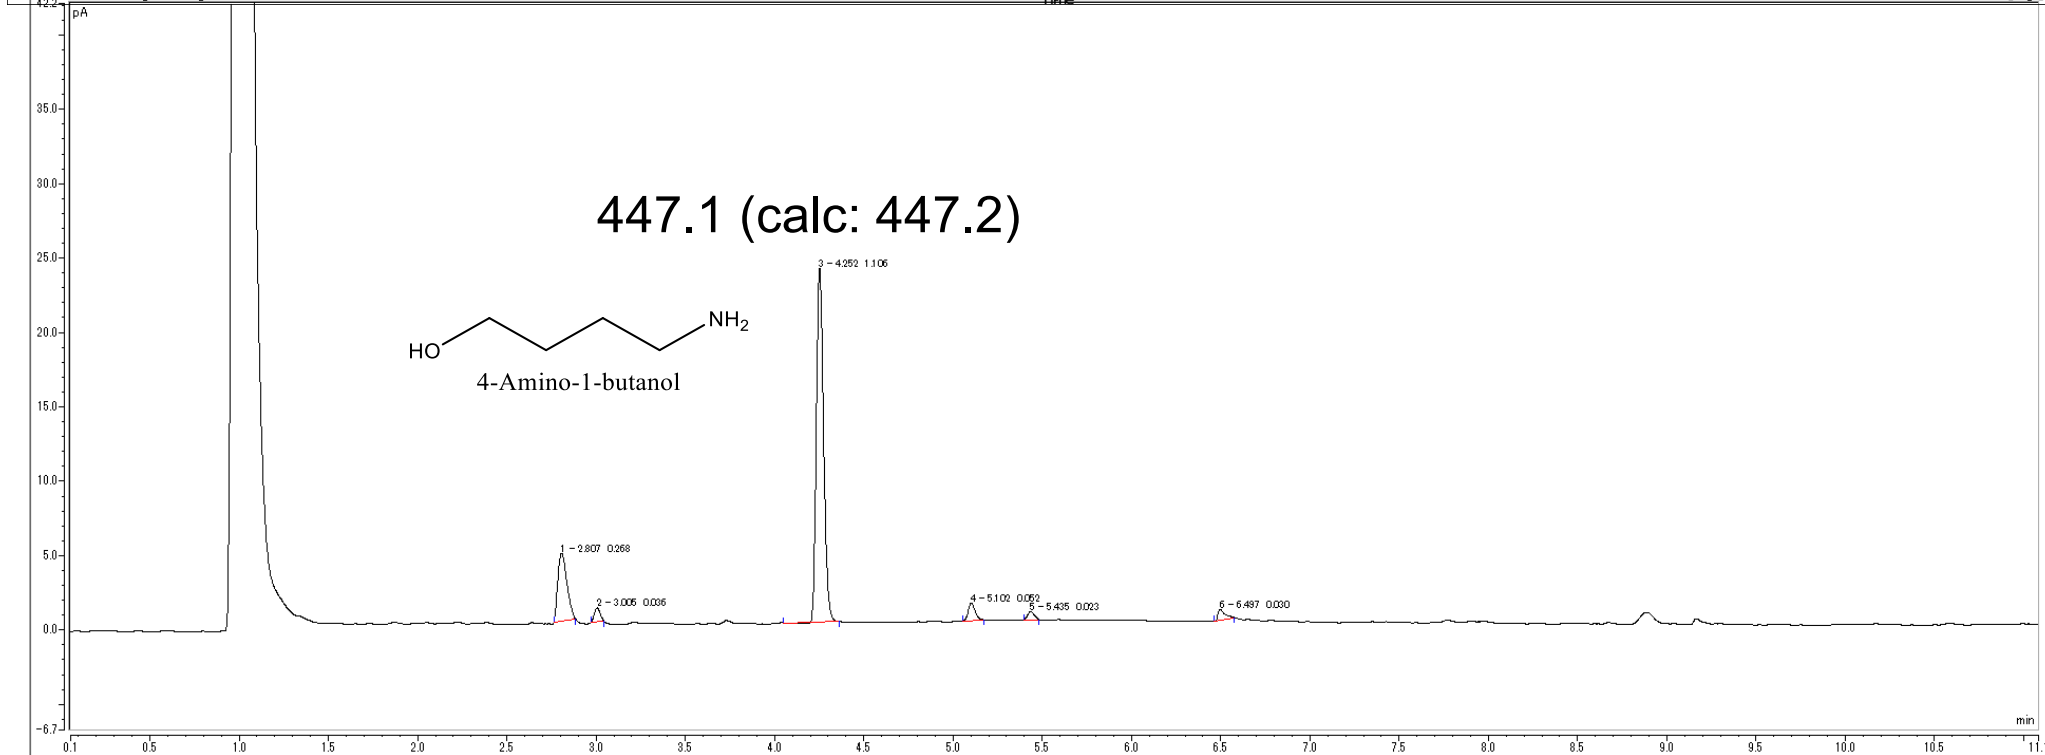

# Supplementary Data

# LC-CAD trace of the SuFEx reaction

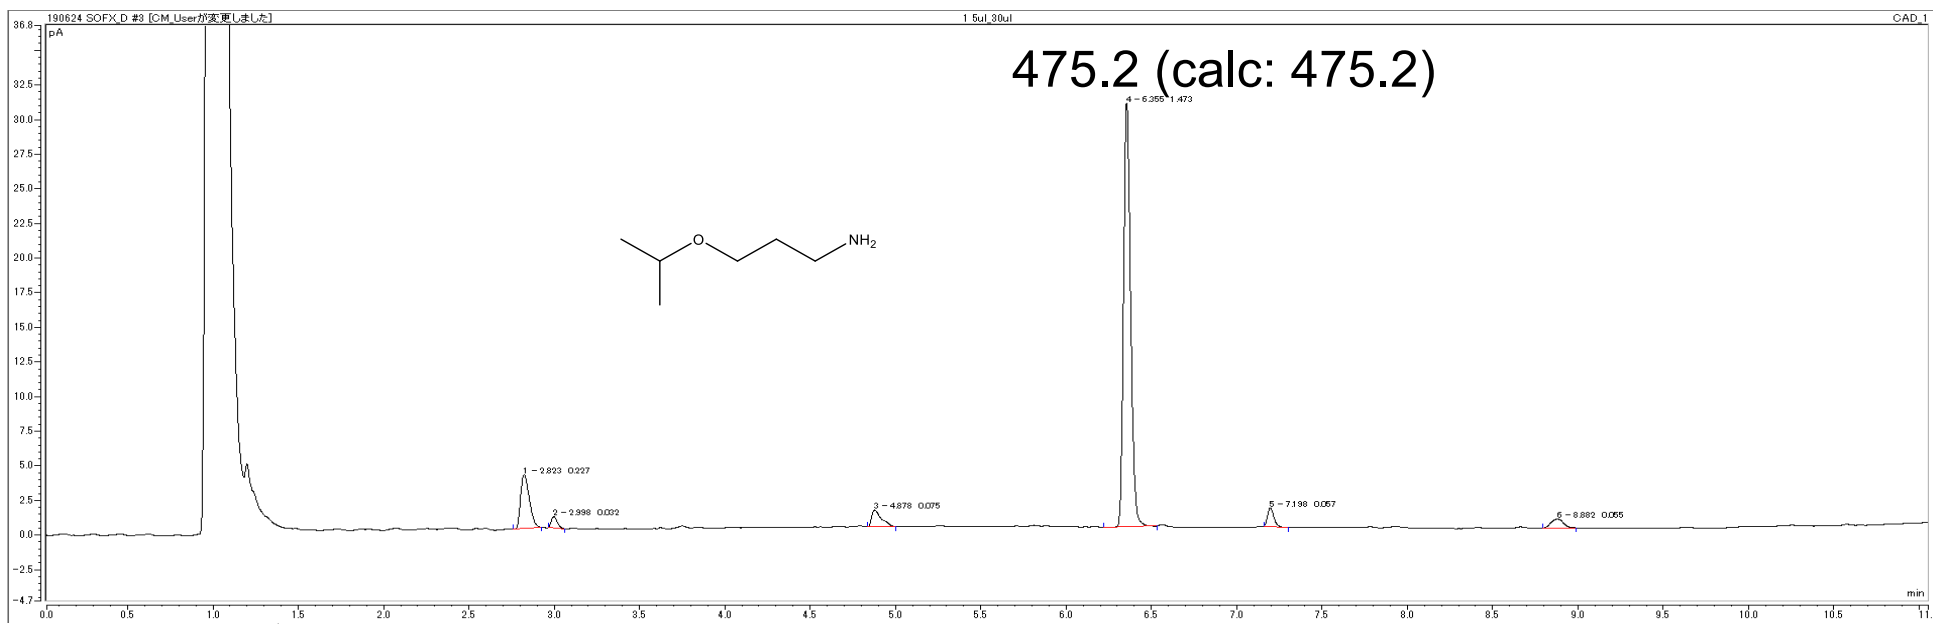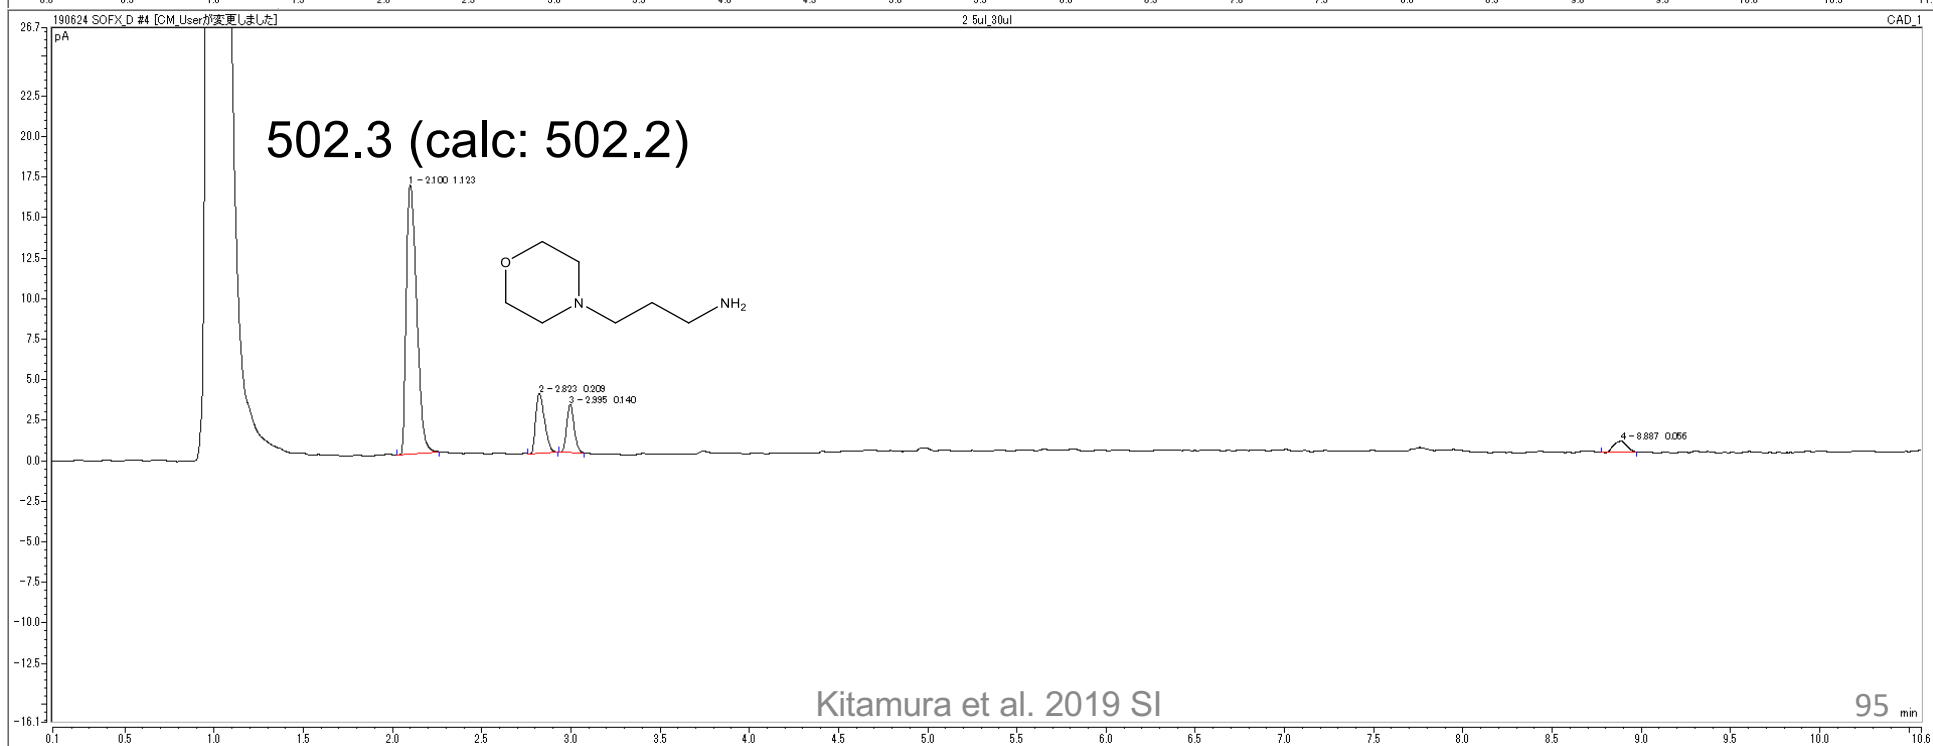

# Supplementary Data

# LC-CAD trace of the SuFEx reaction

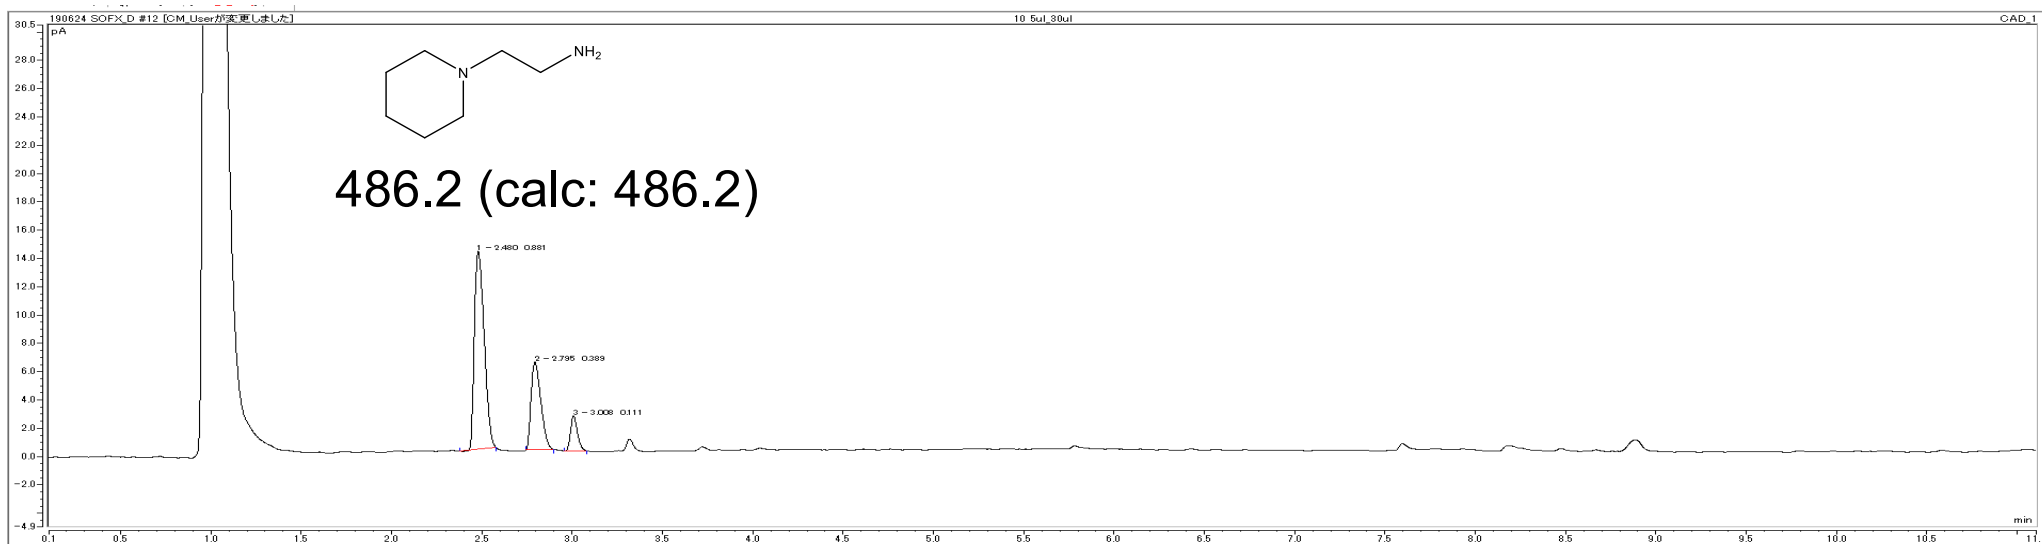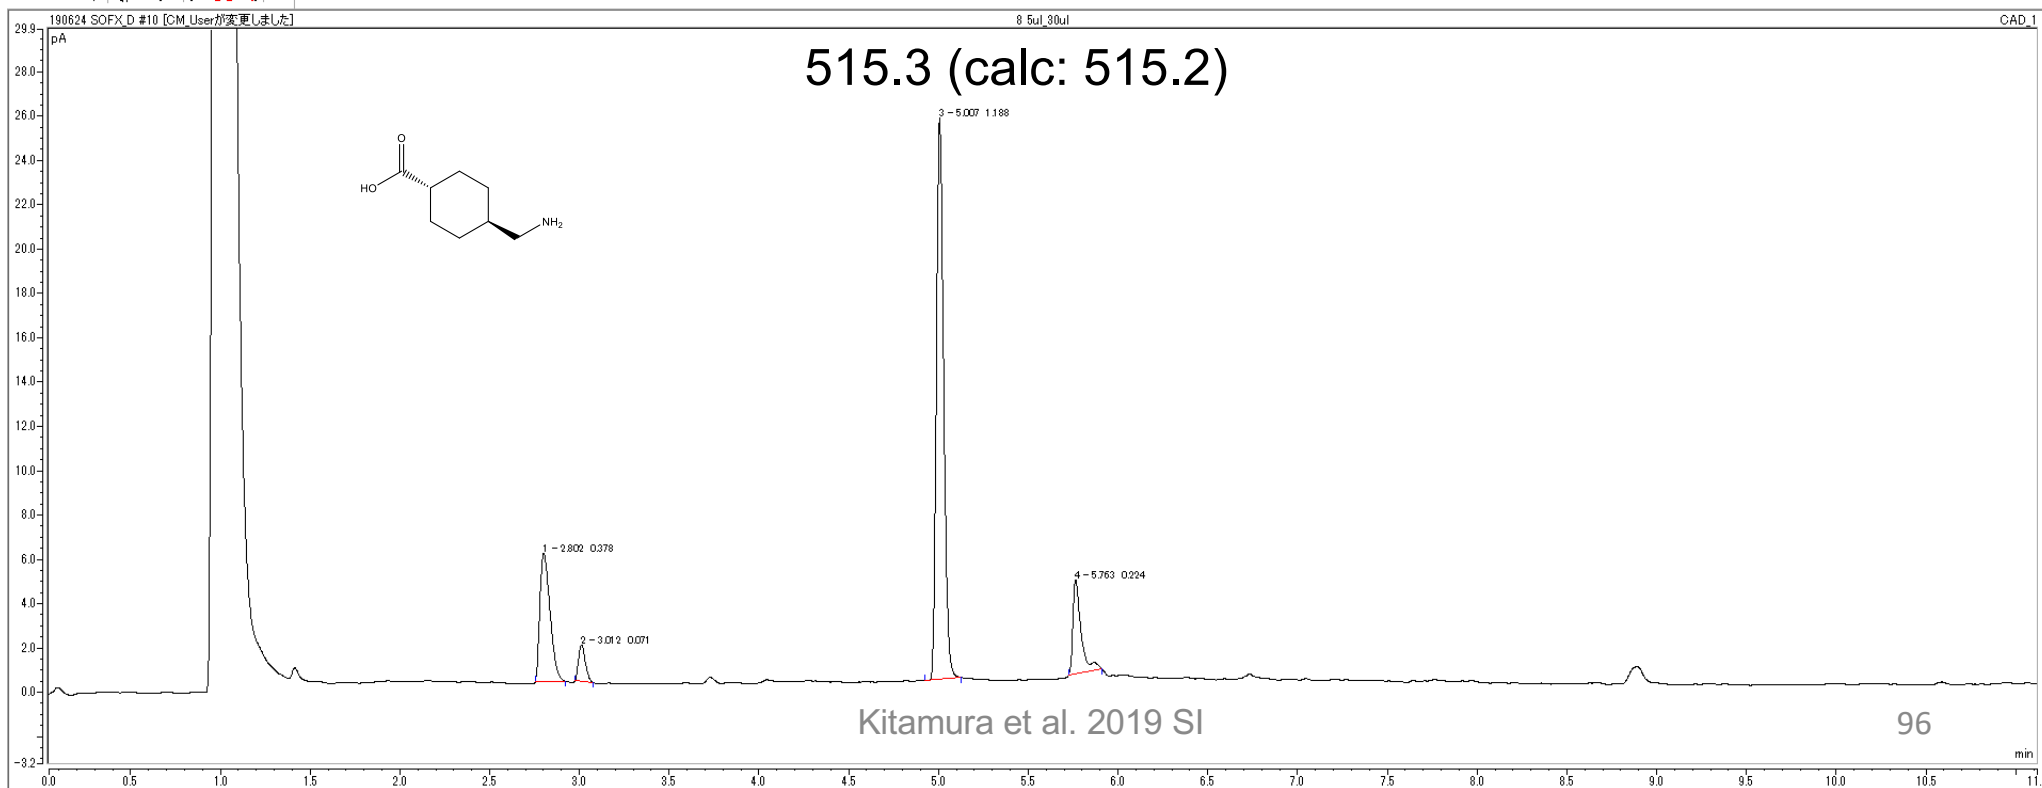



# Supplementary Data

# LC-CAD trace of the SuFEx reaction

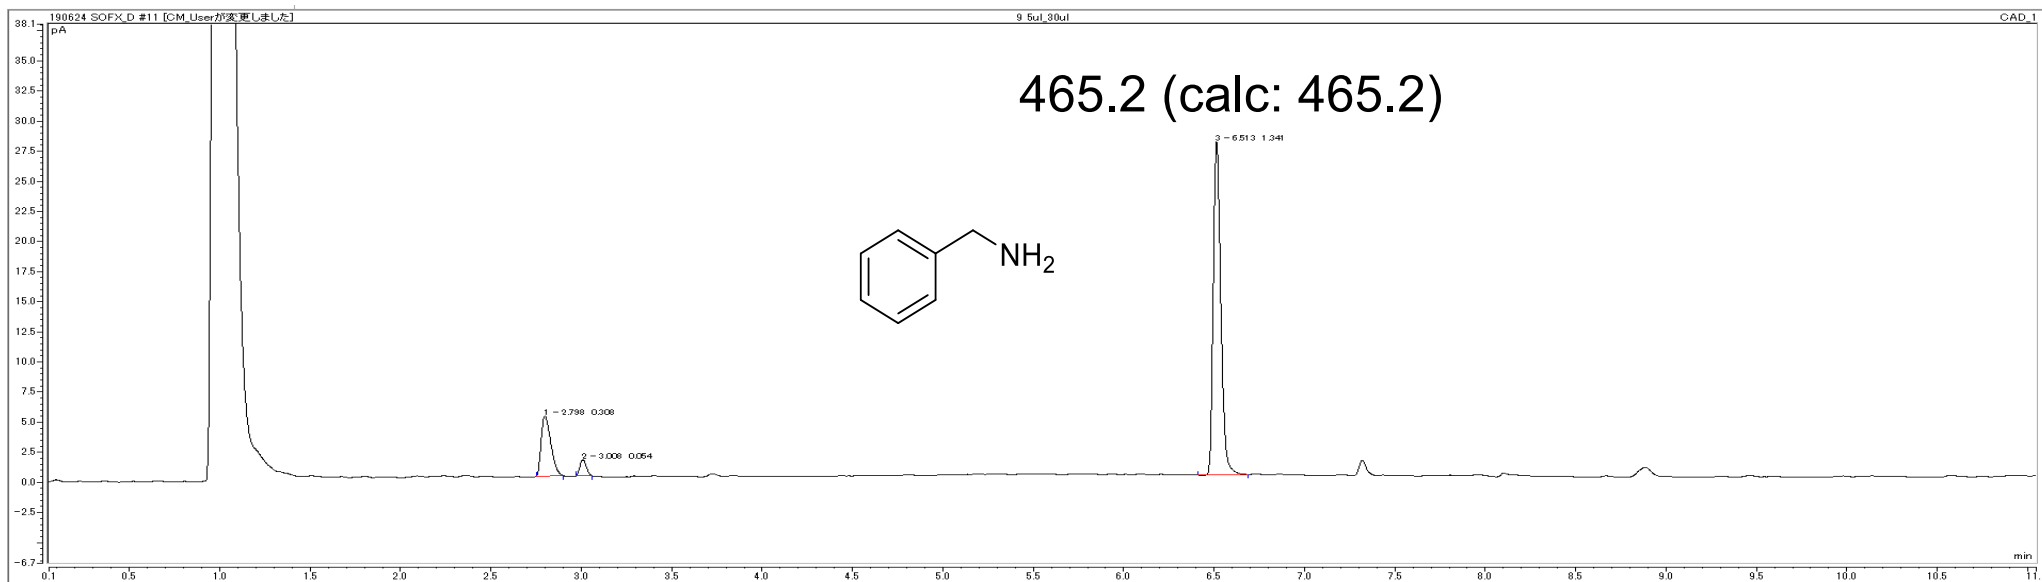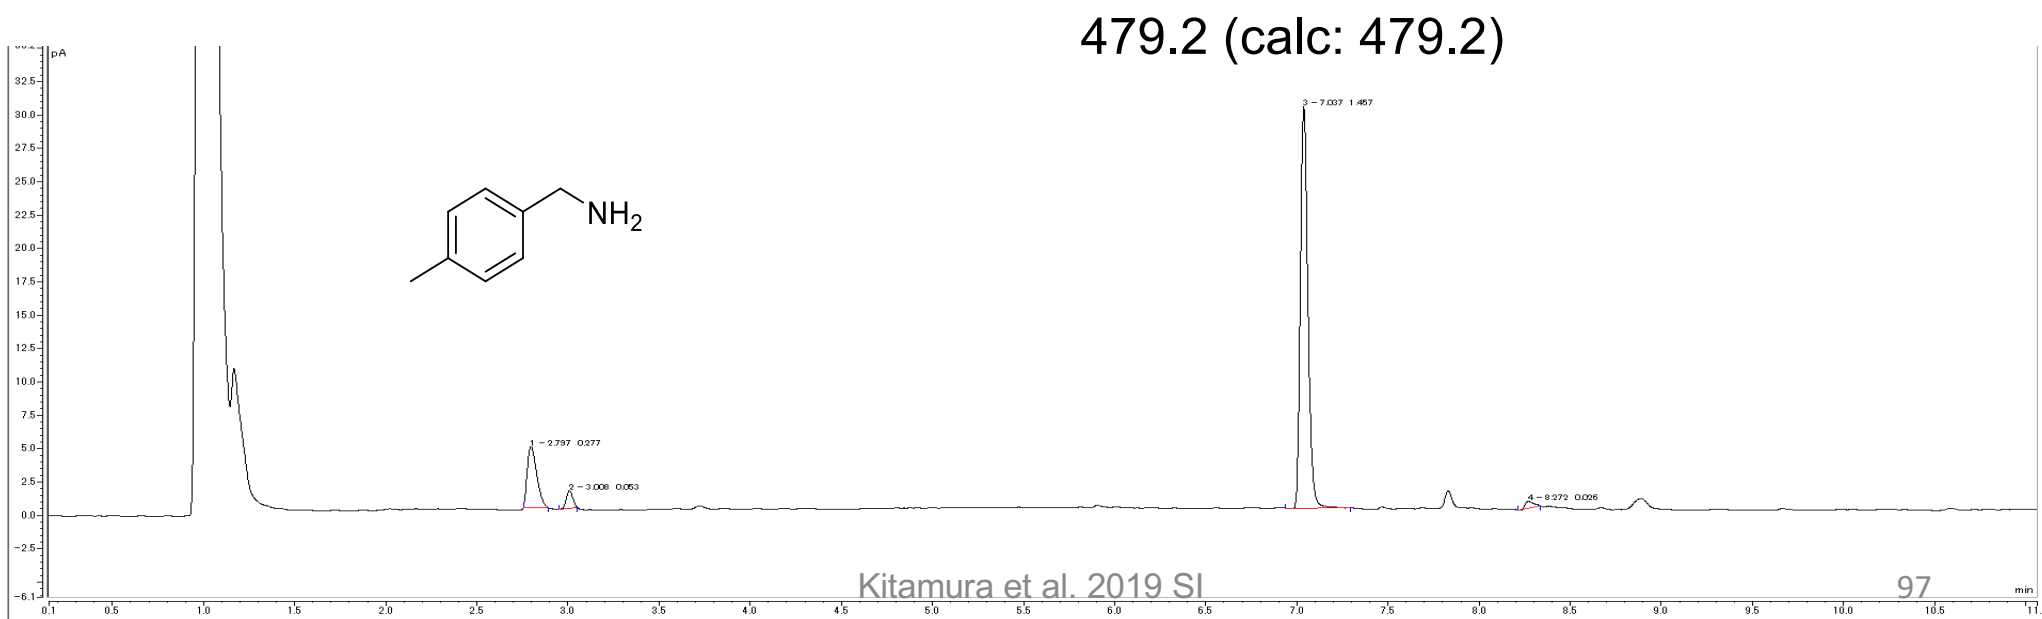

# Supplementary Data

## LC-CAD trace of the SuFEx reaction

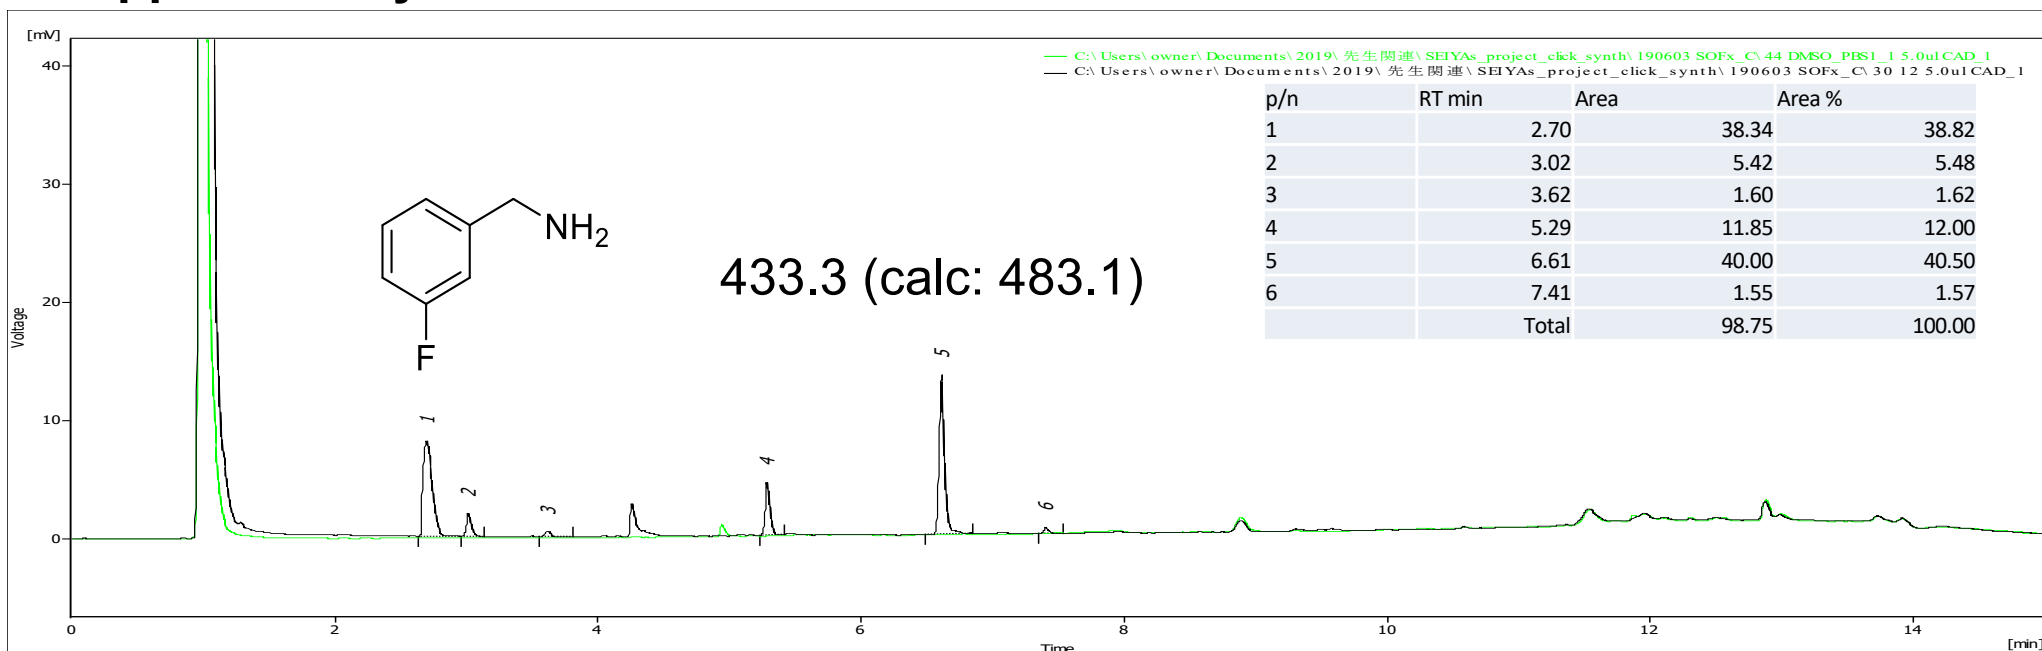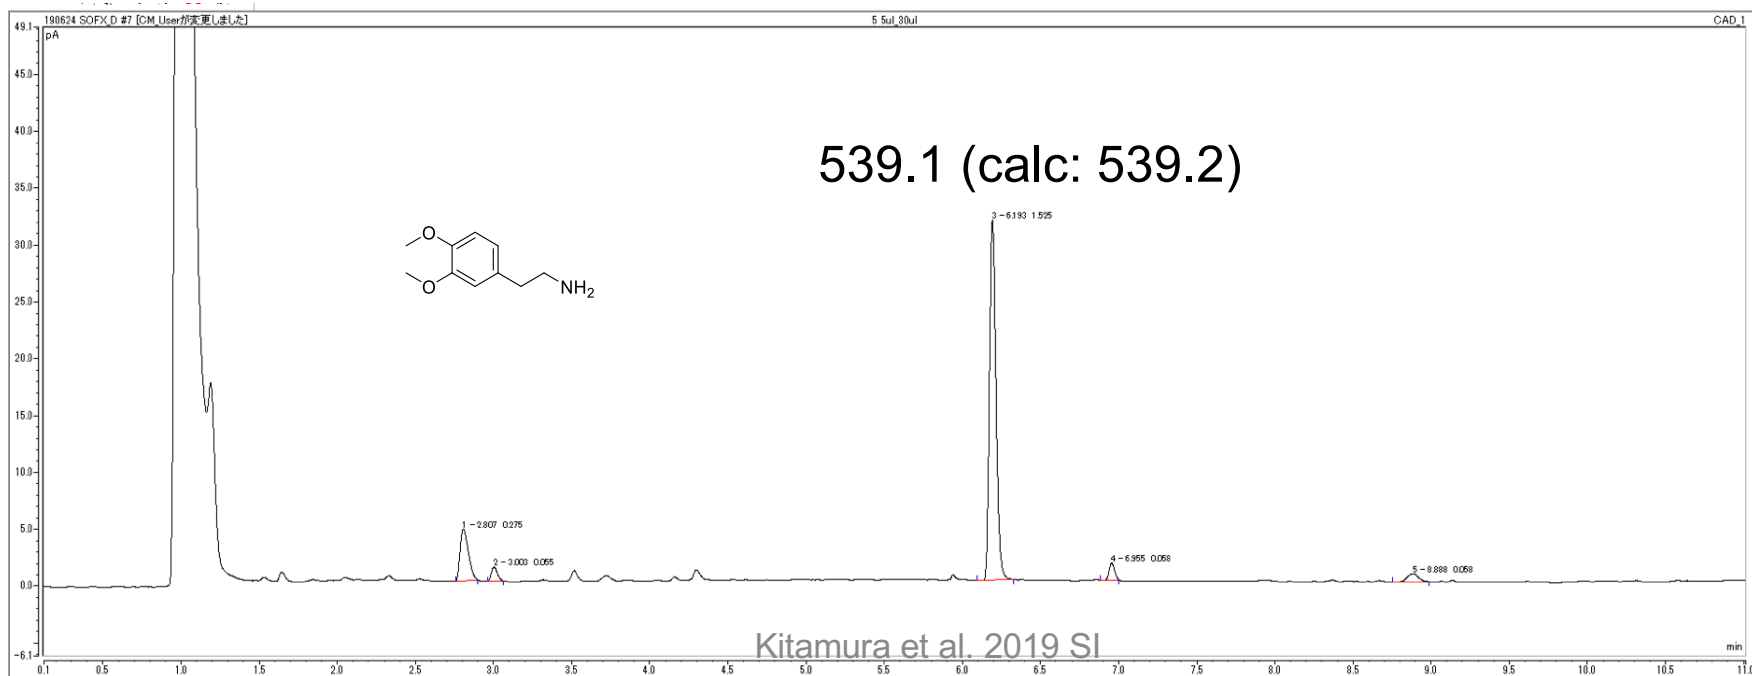

# Supplementary Data

## LC-CAD trace of the SuFEx reaction

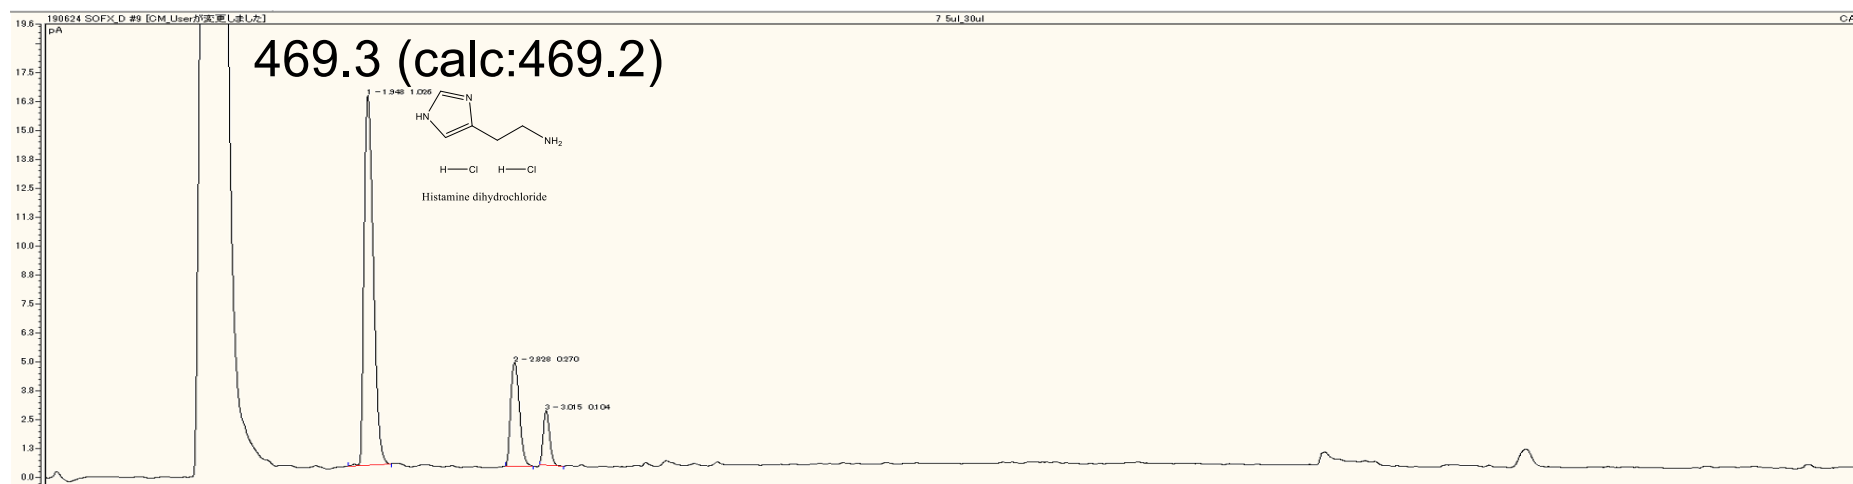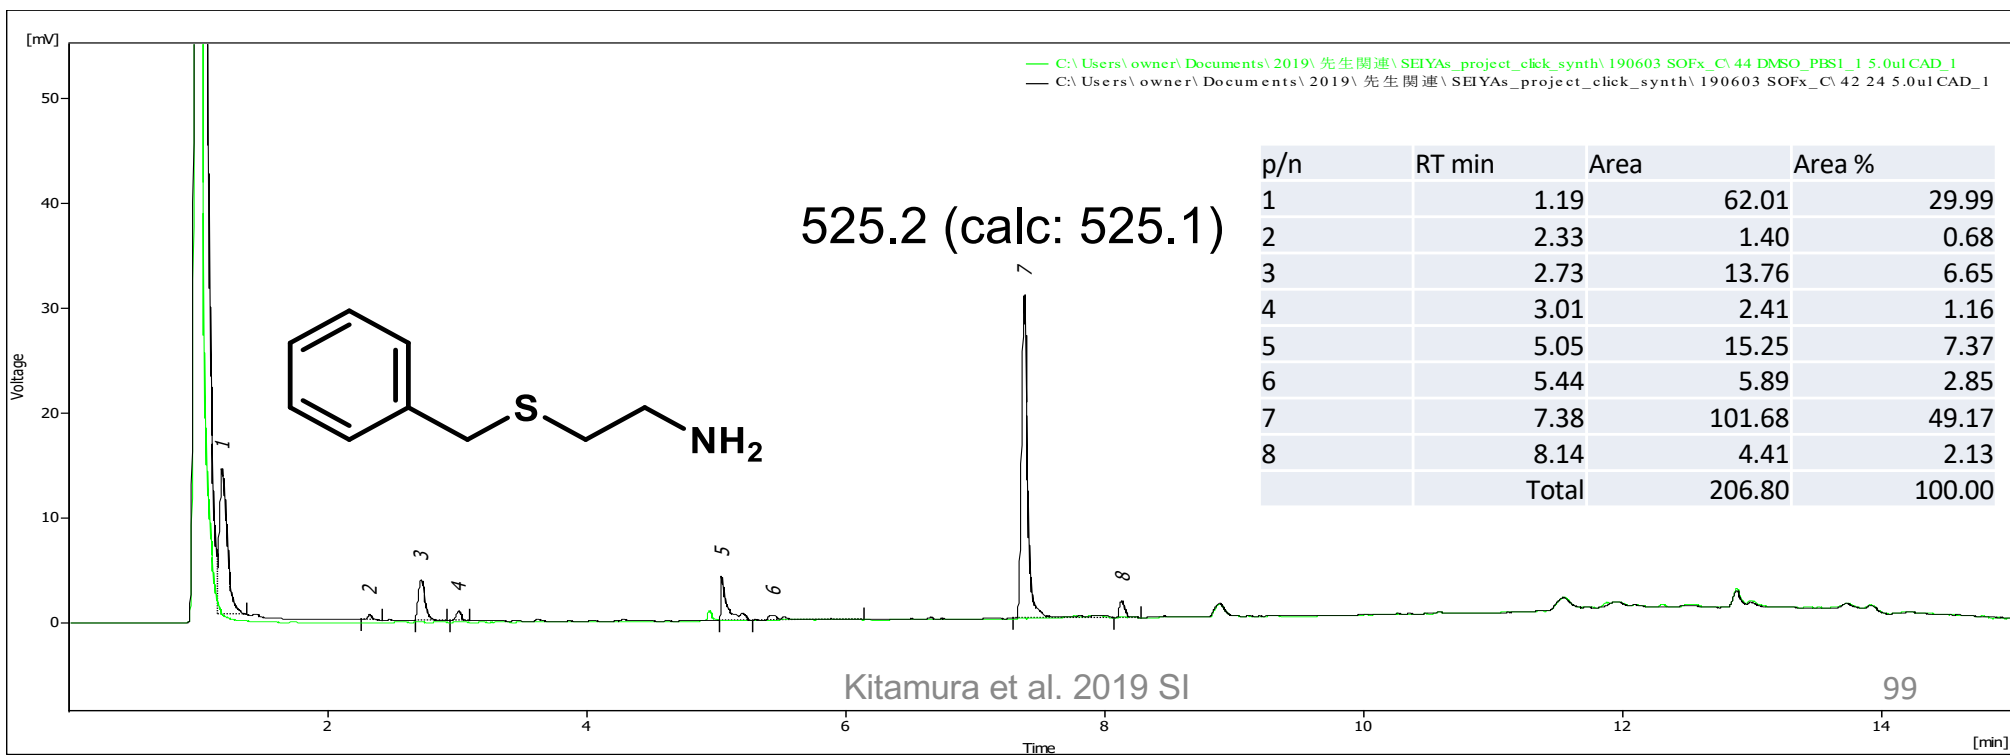

# Supplementary Data

## LC-CAD trace of the SuFEx reaction

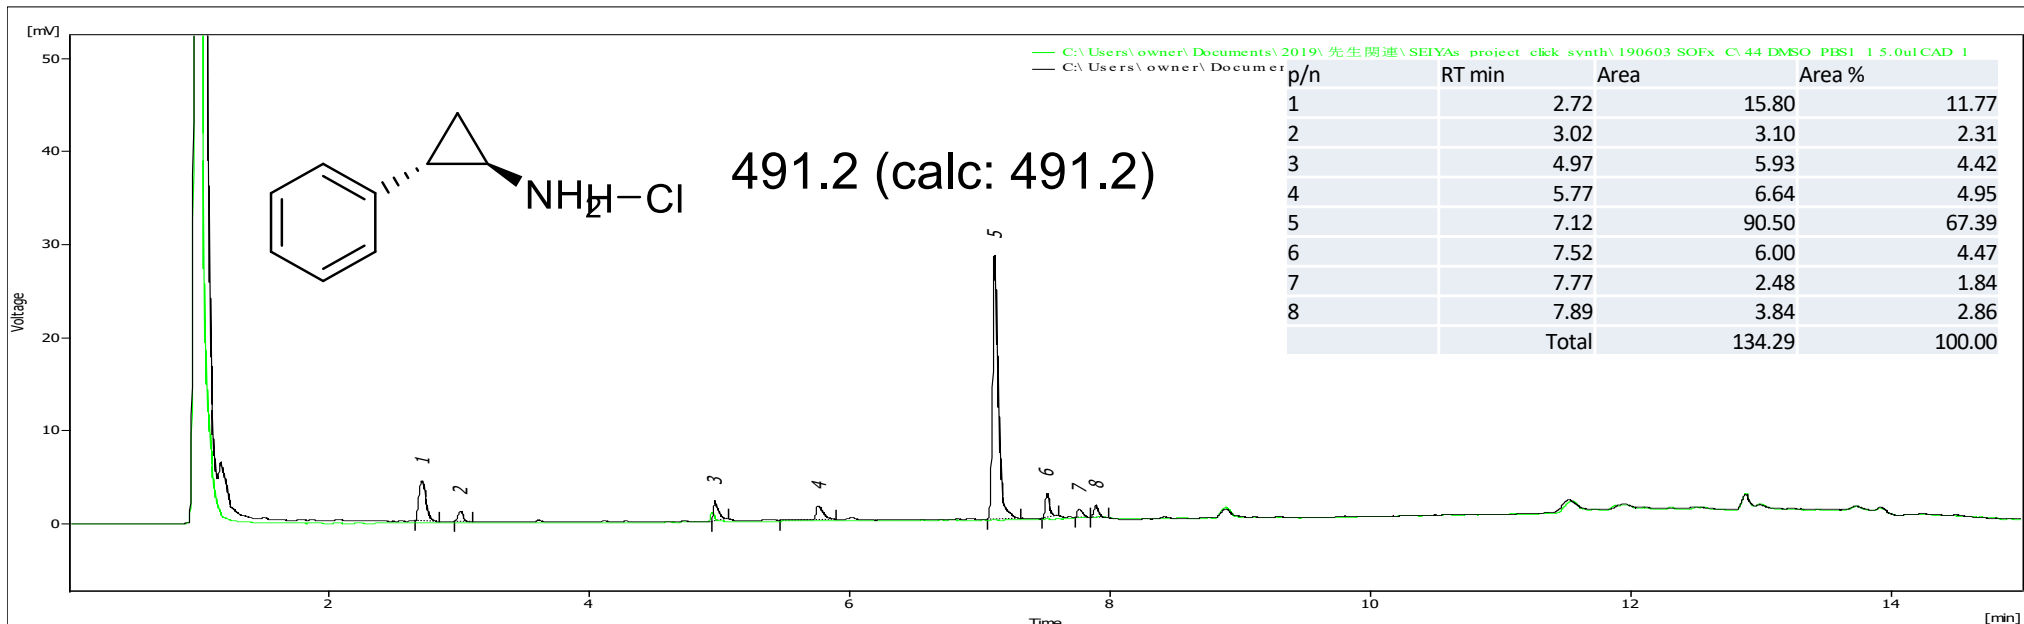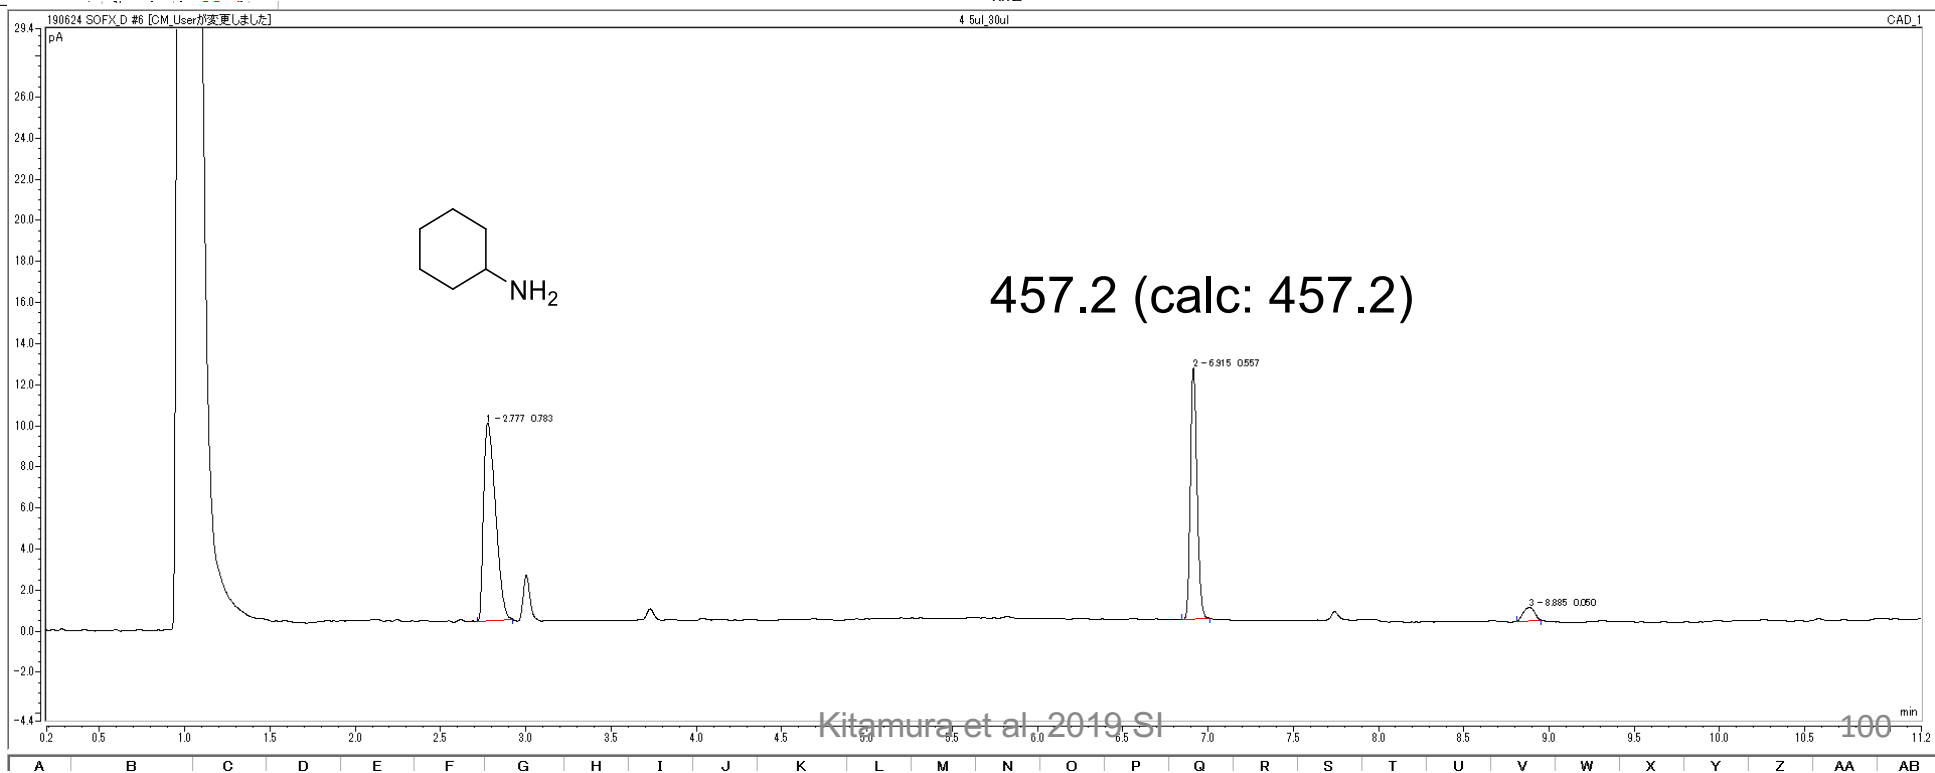

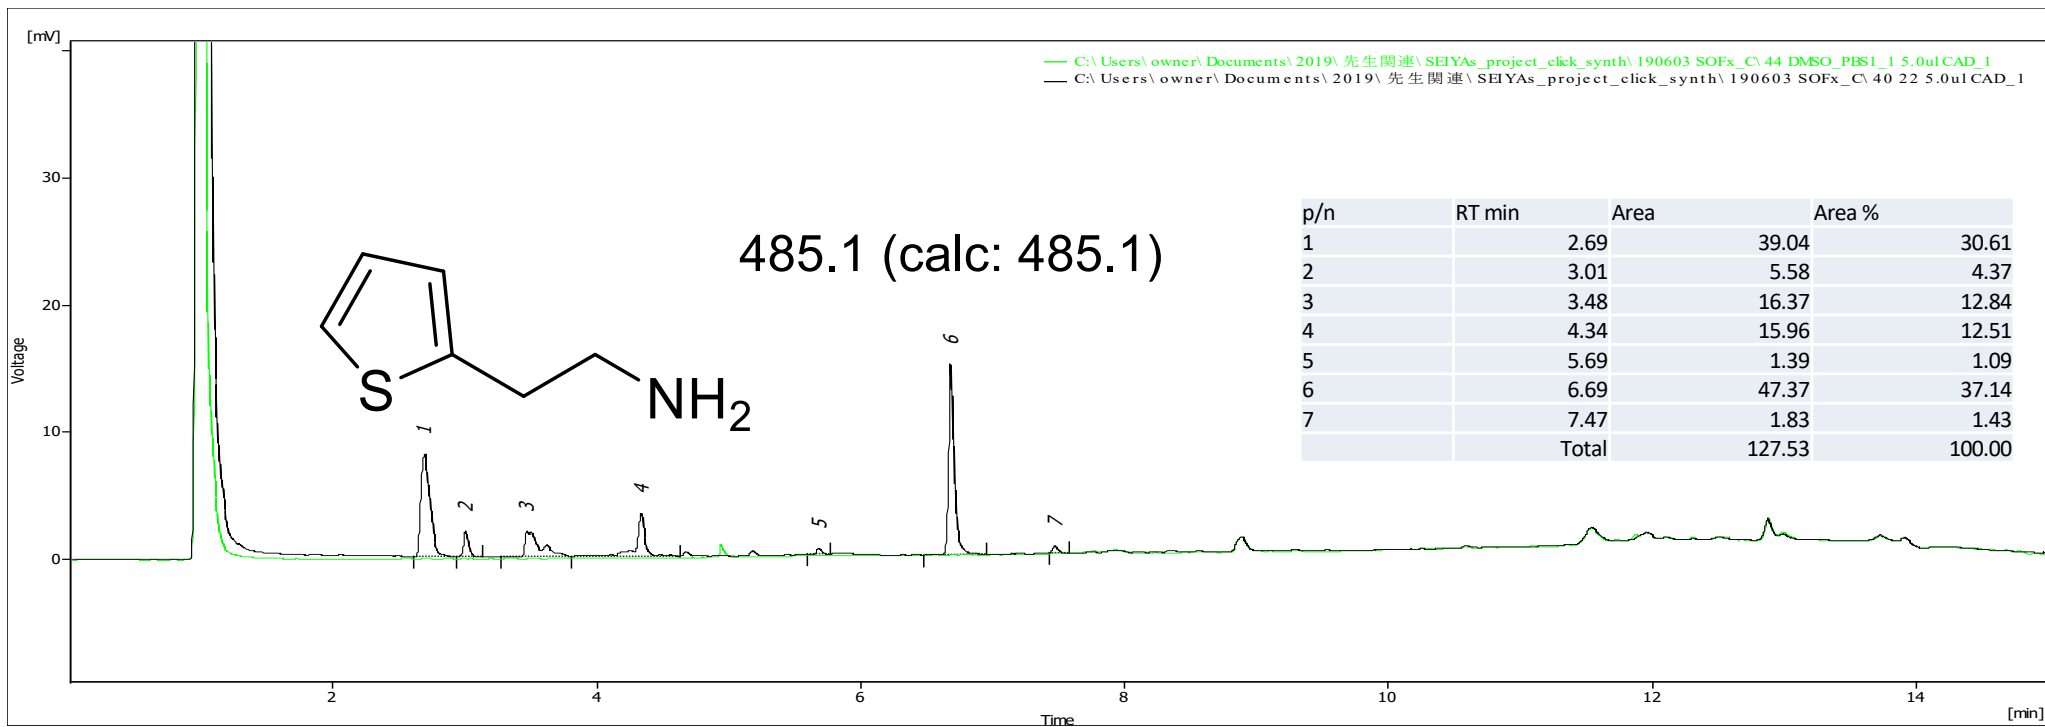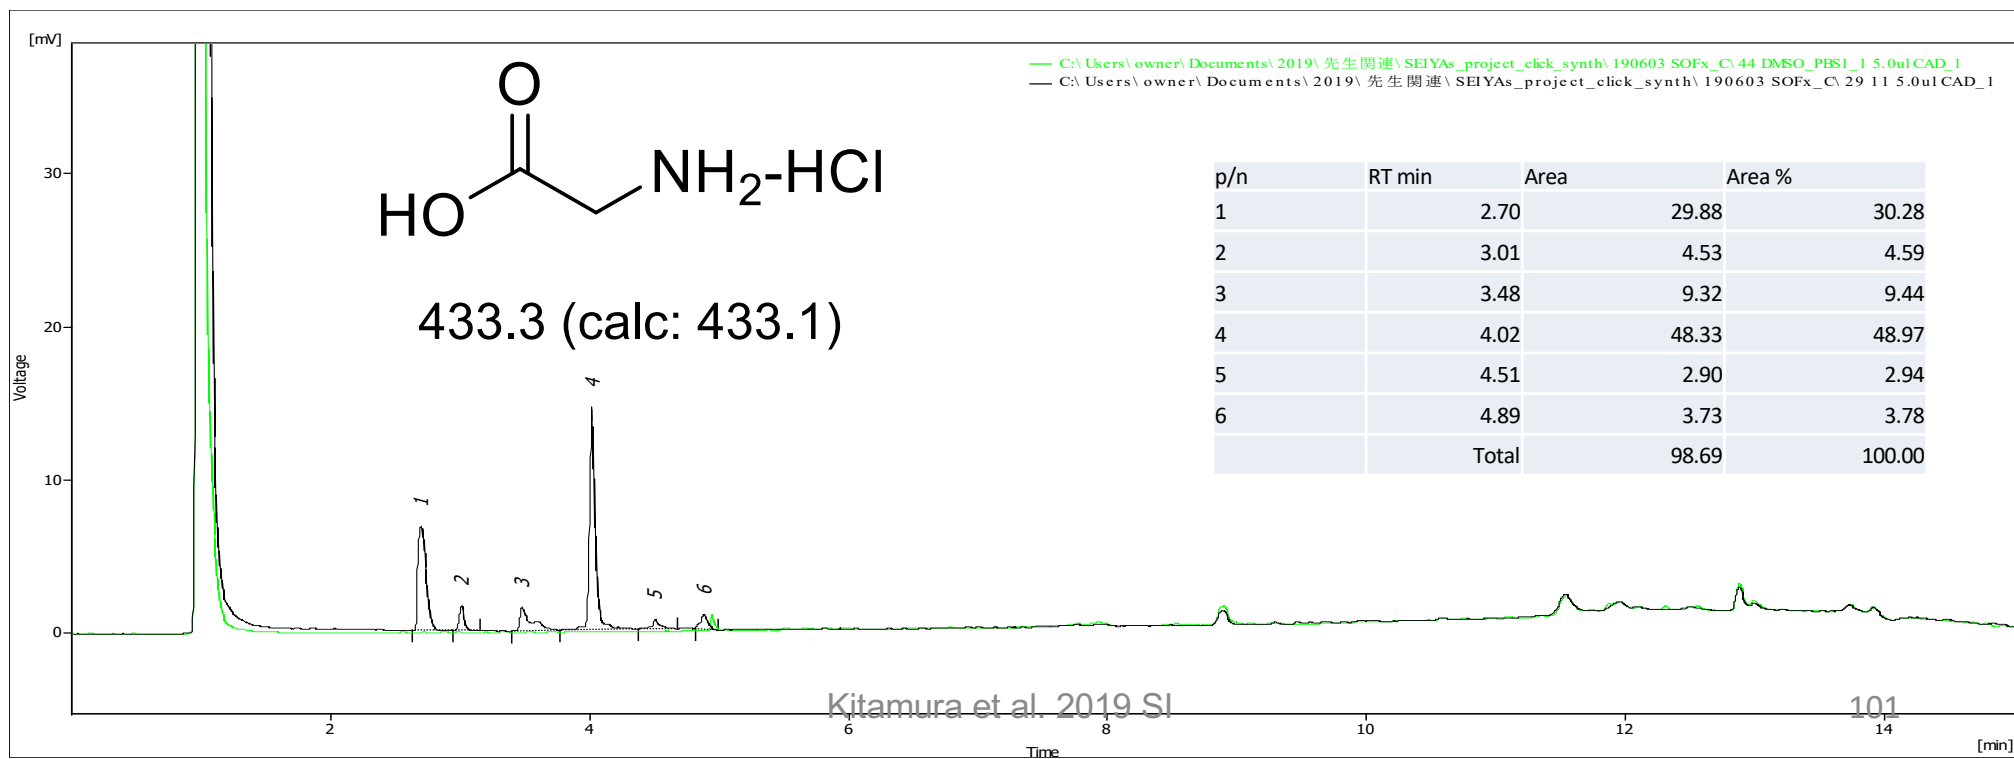

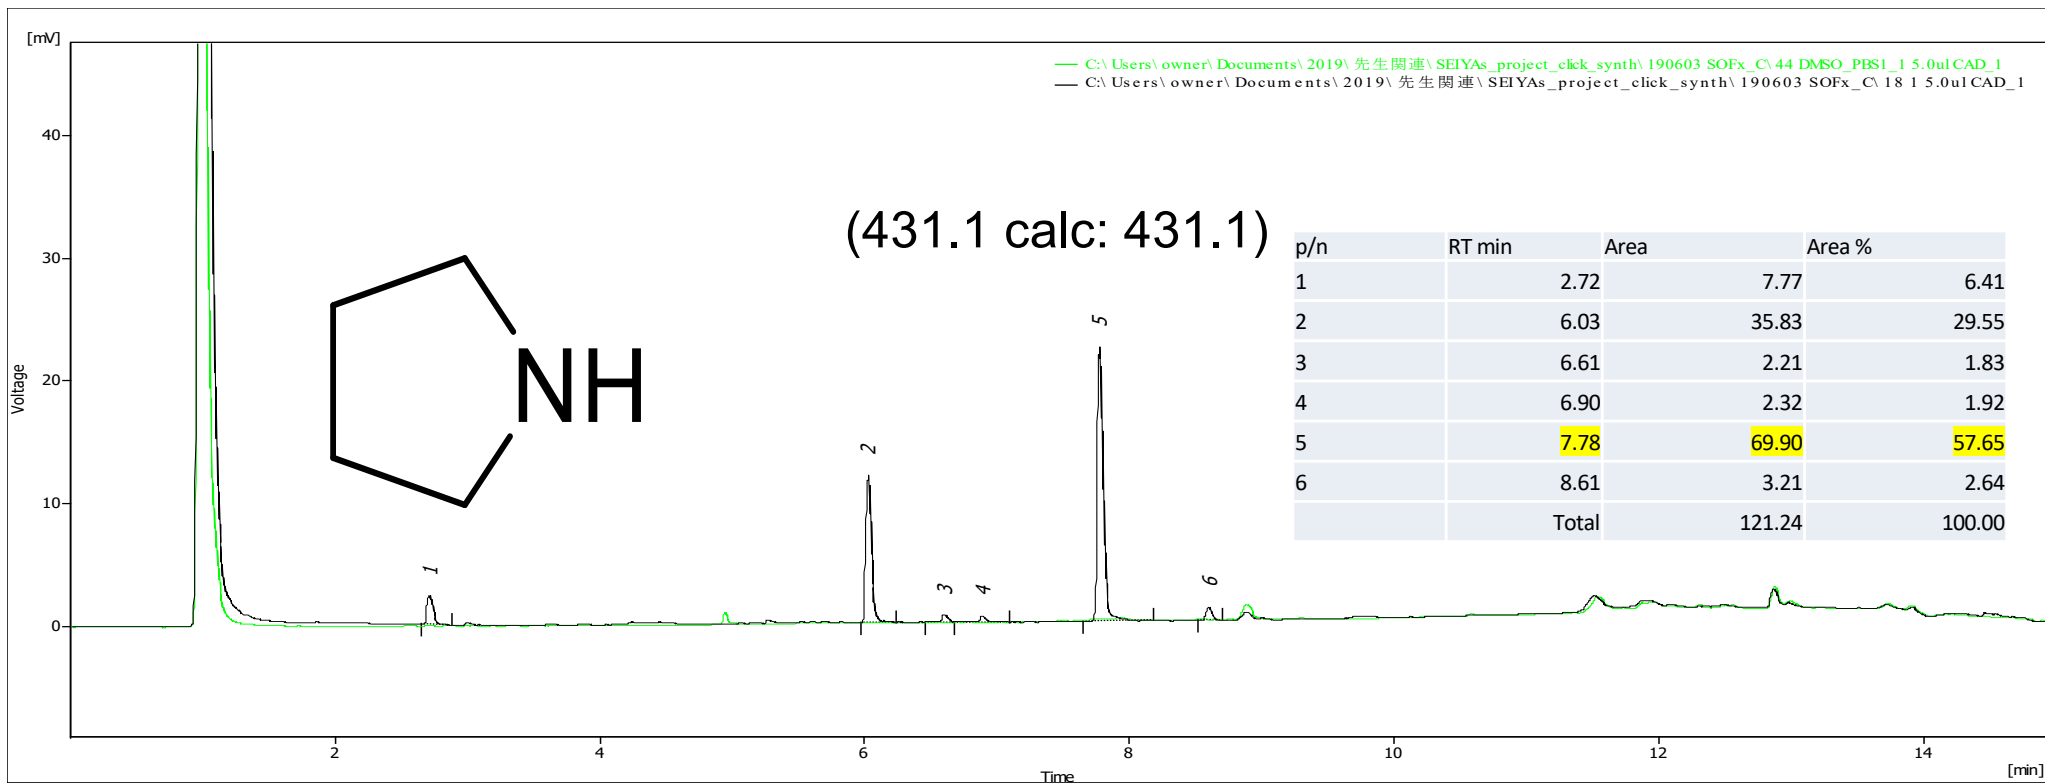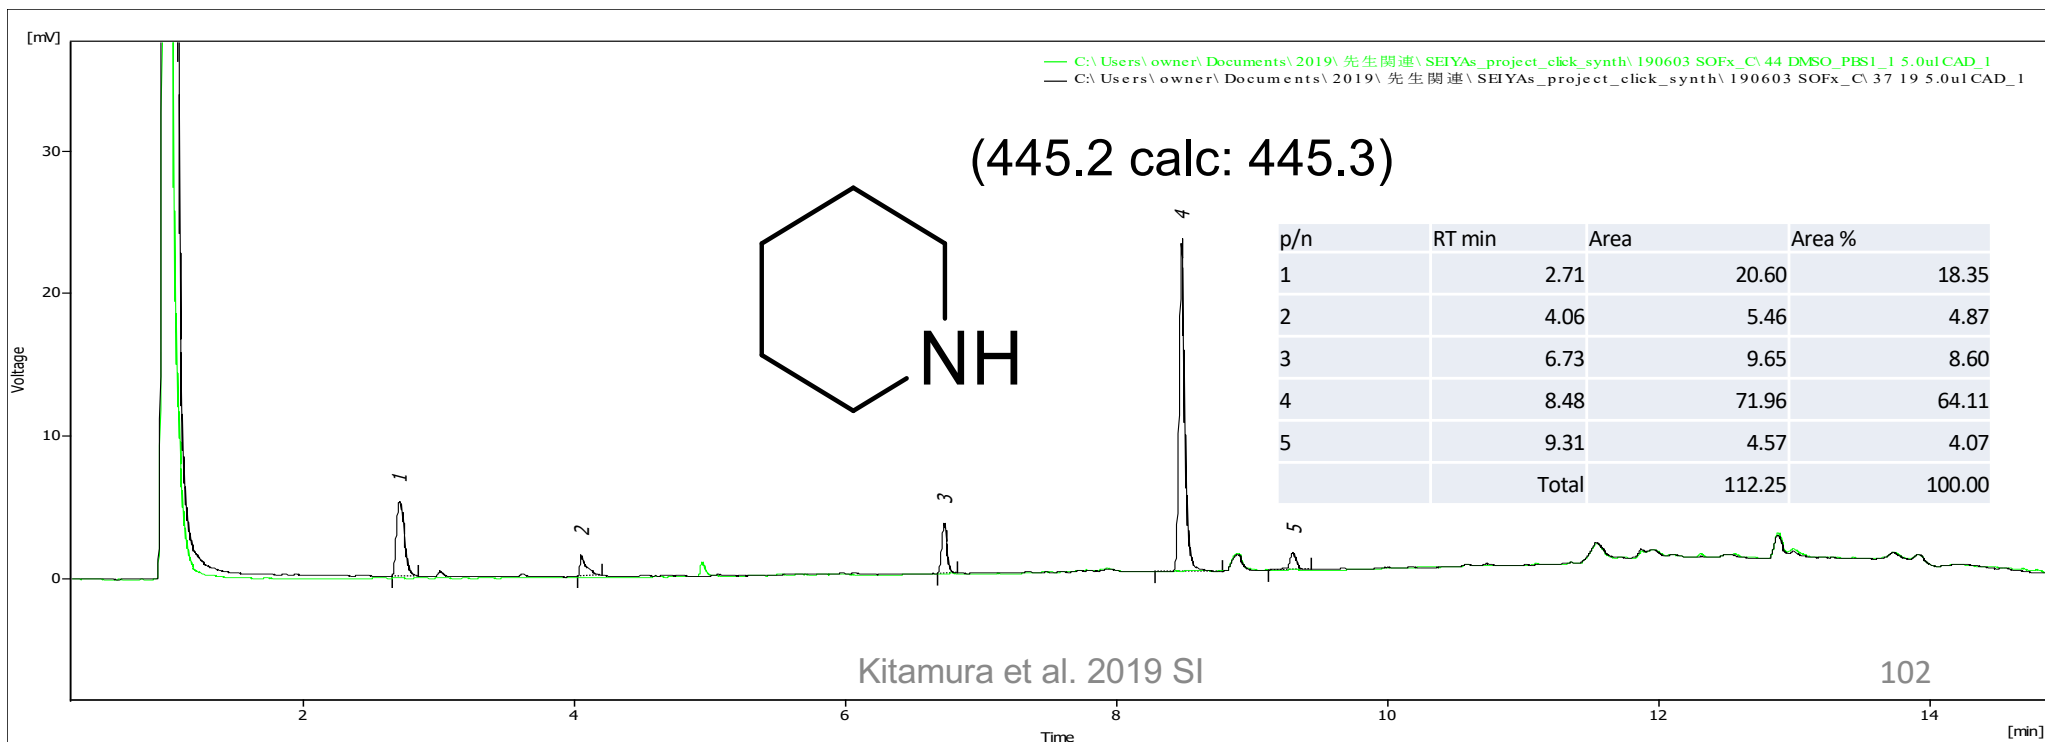

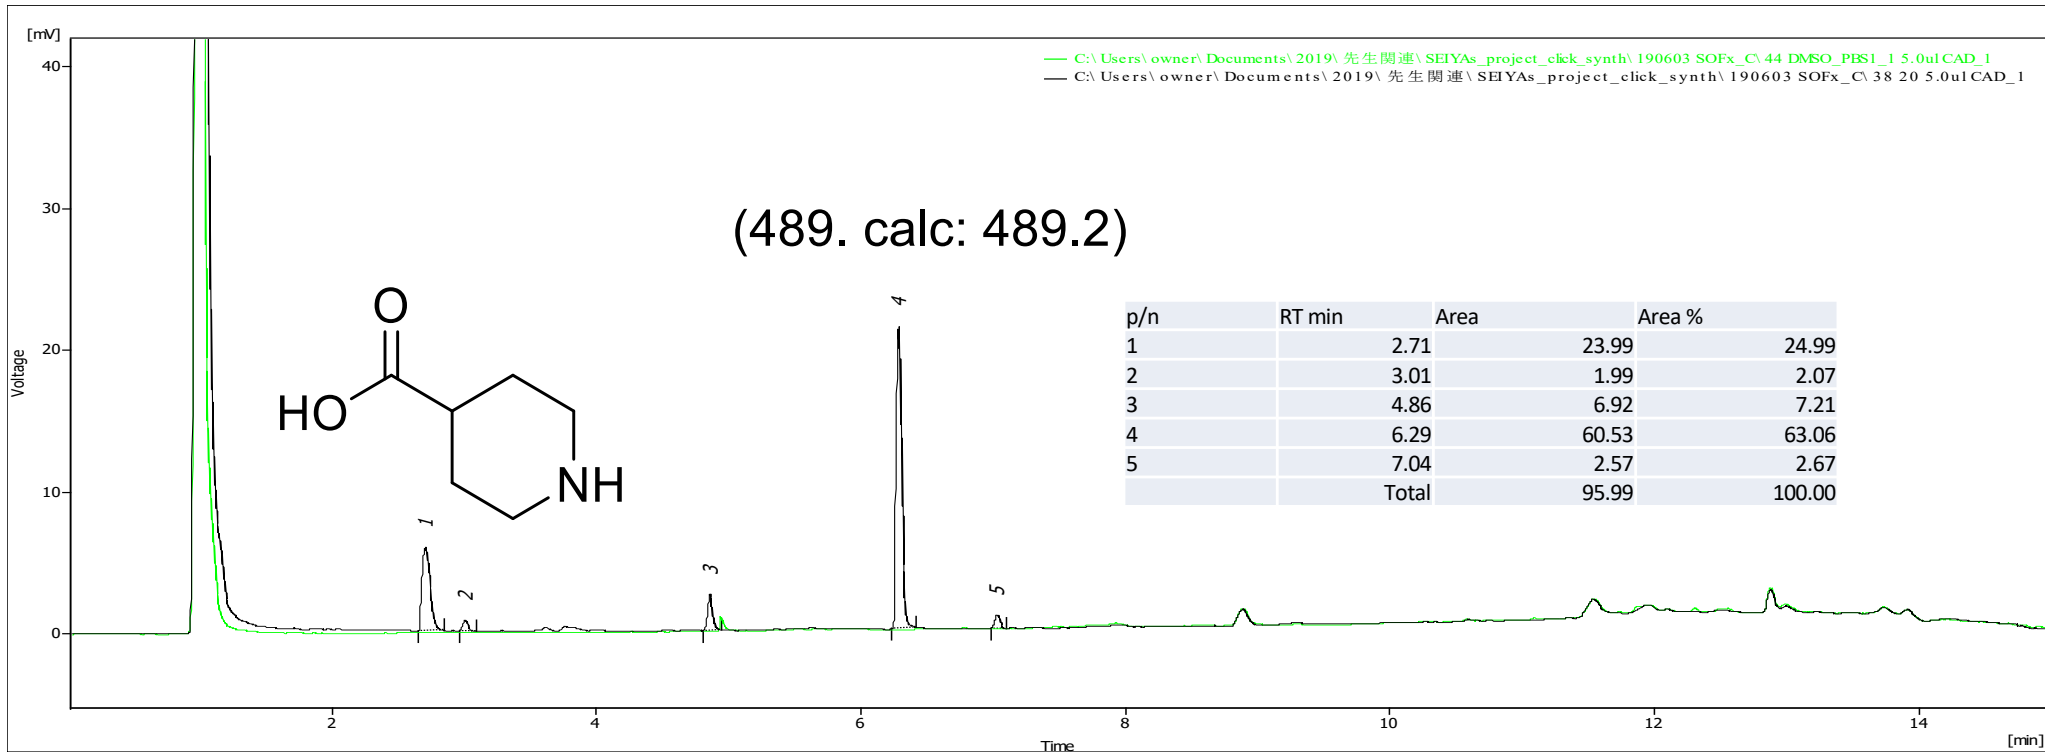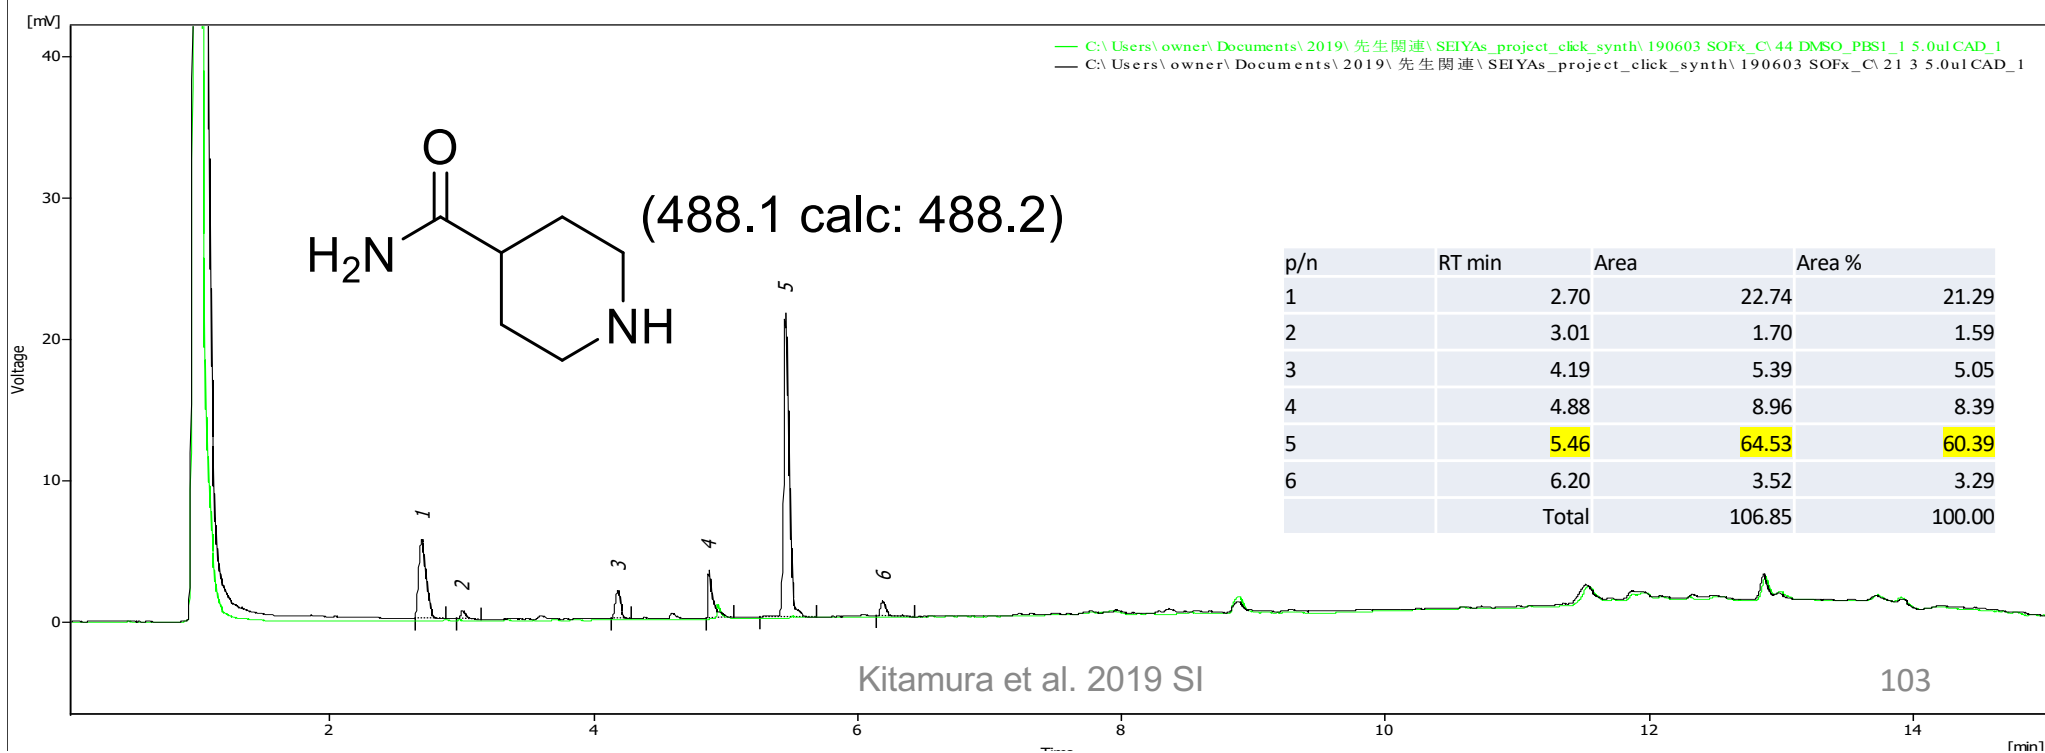

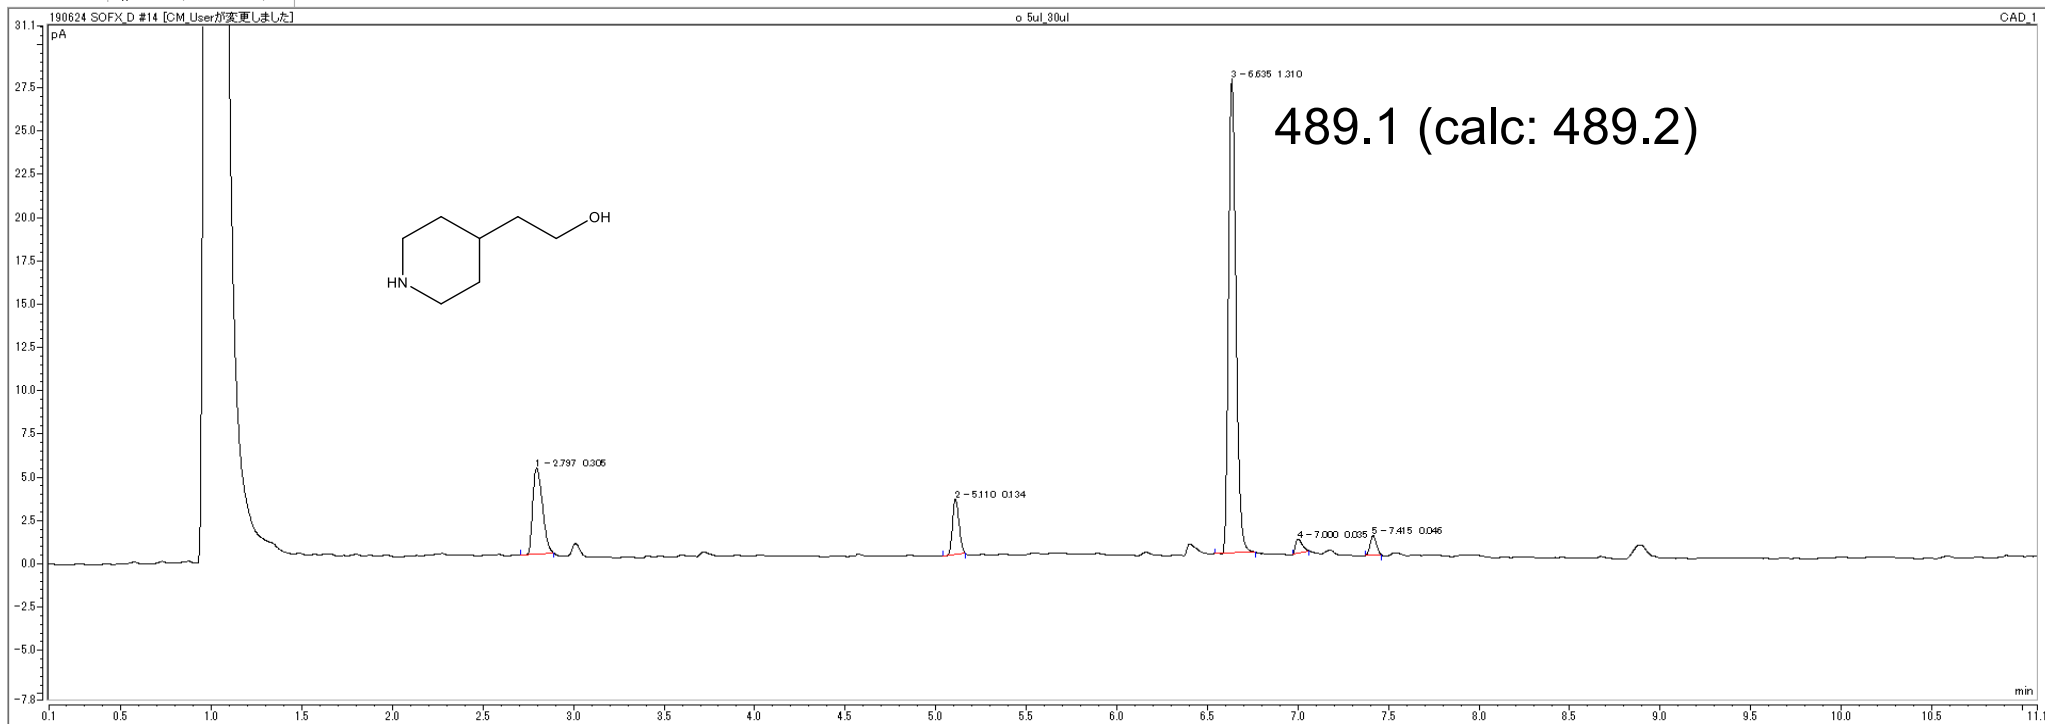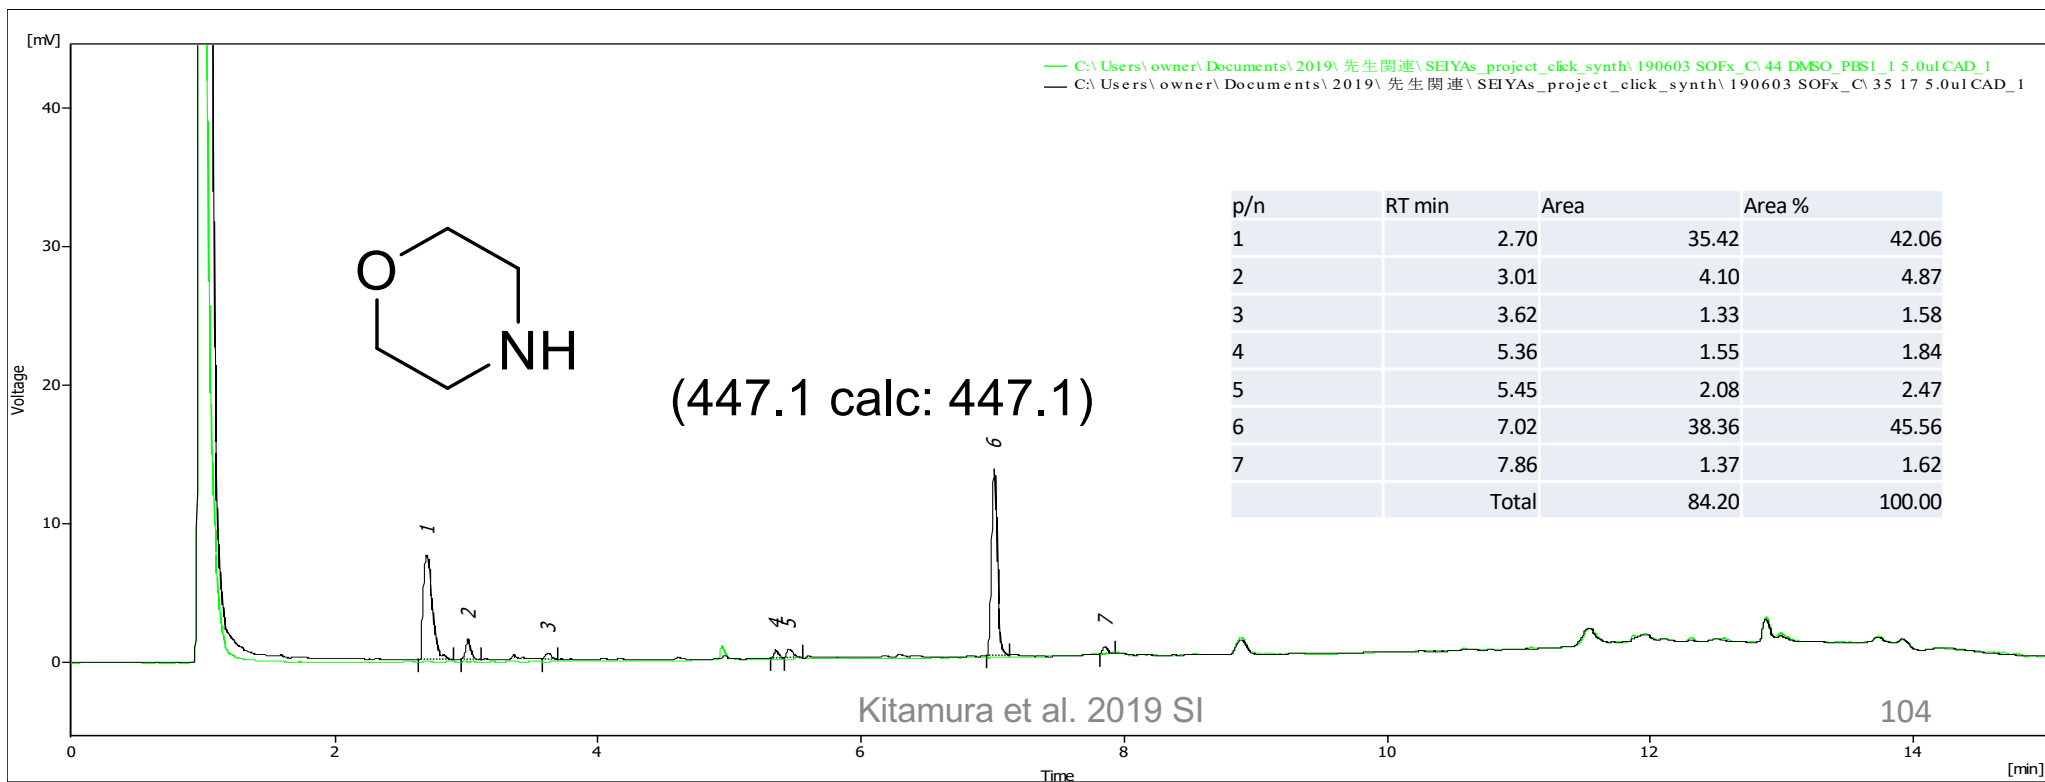



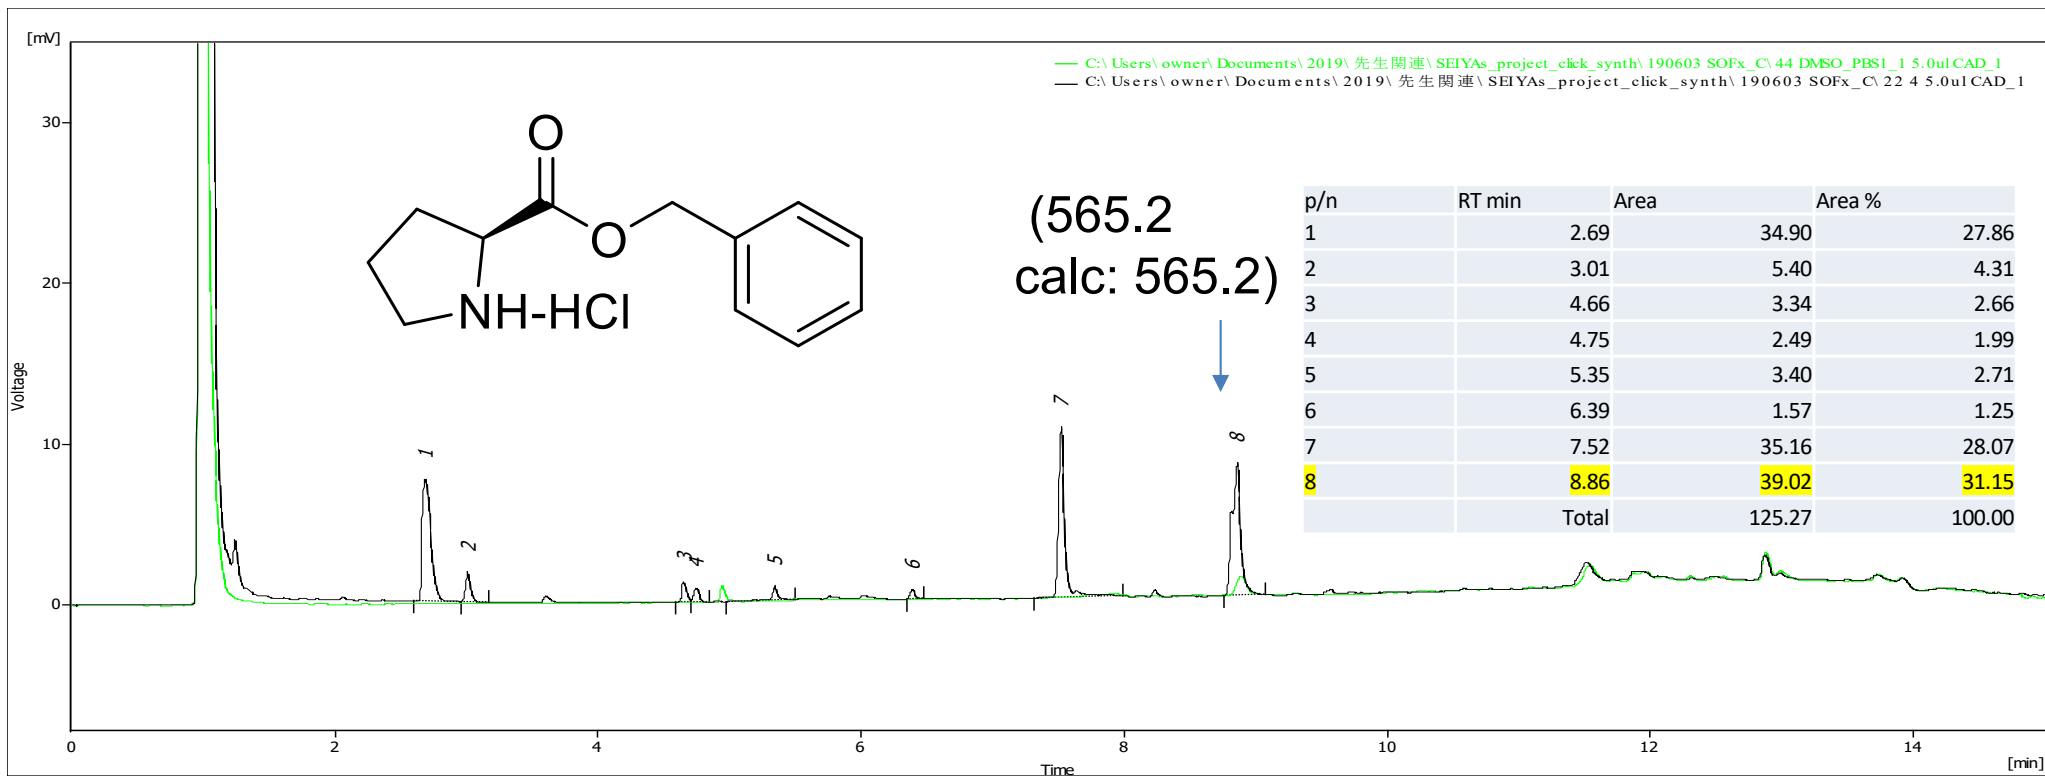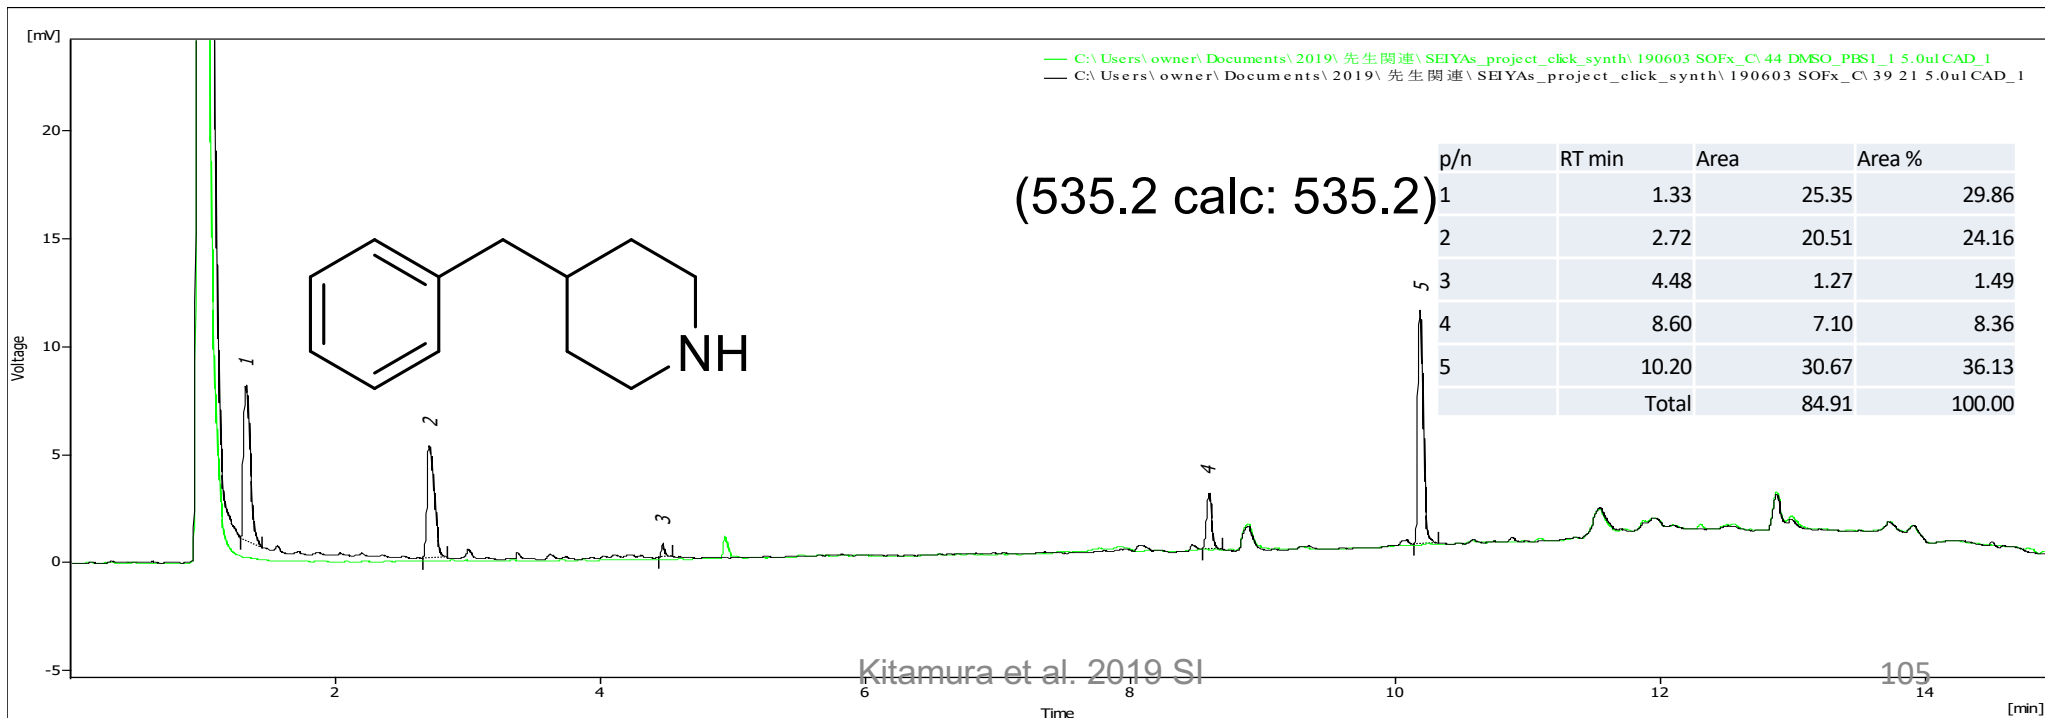

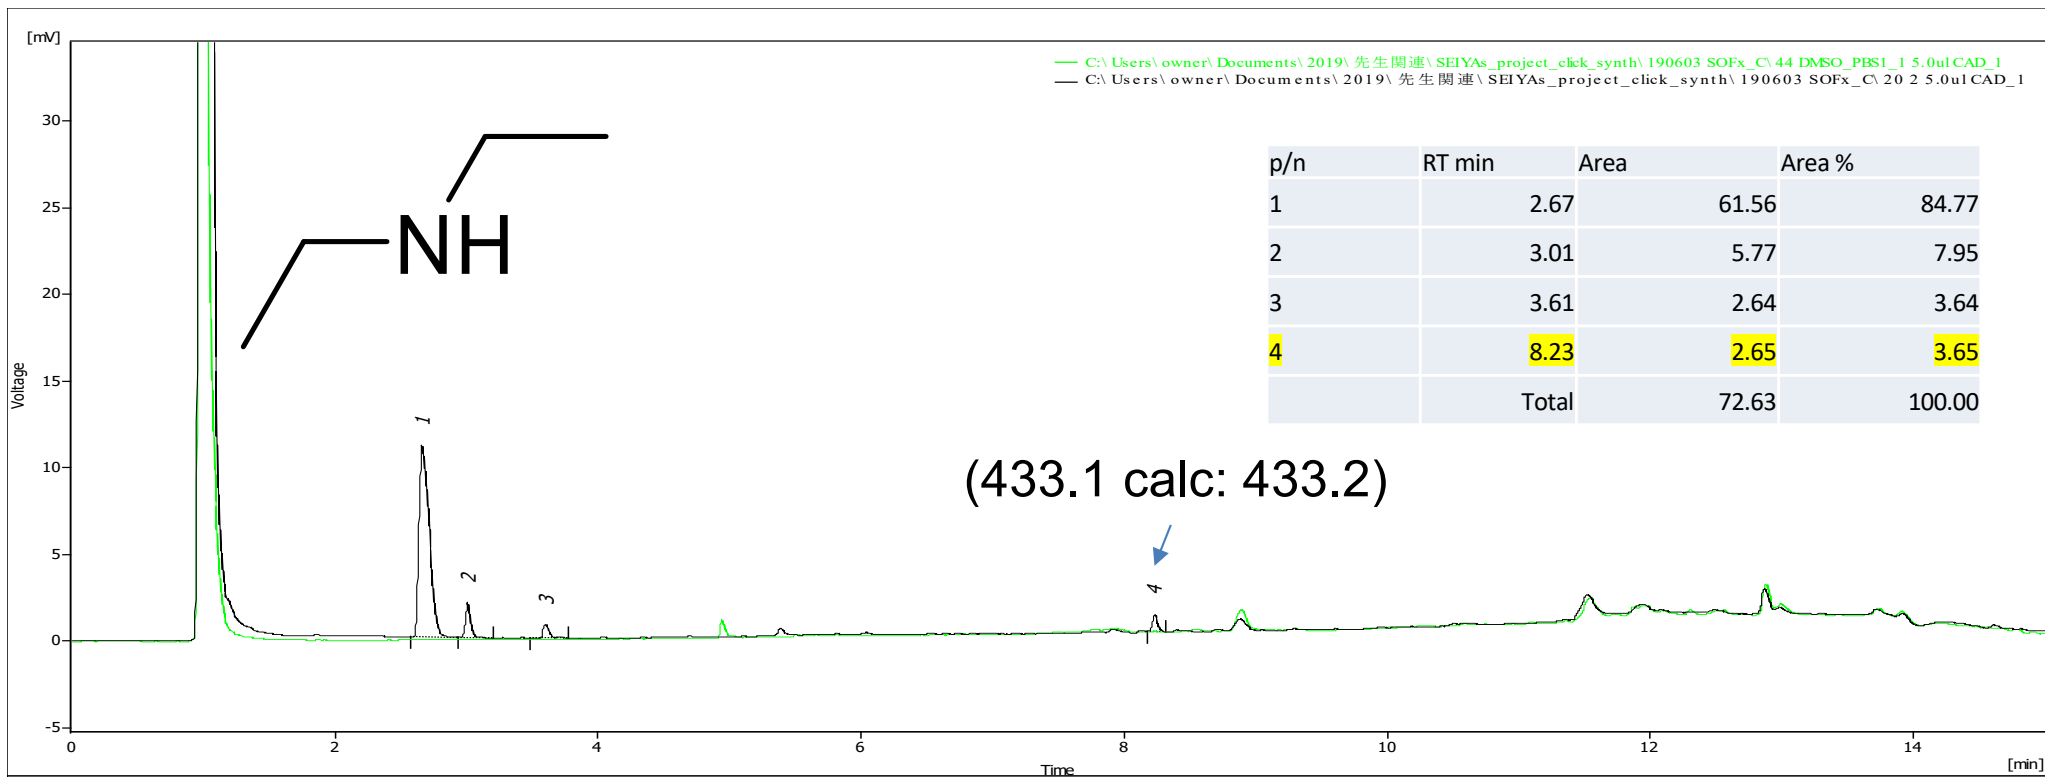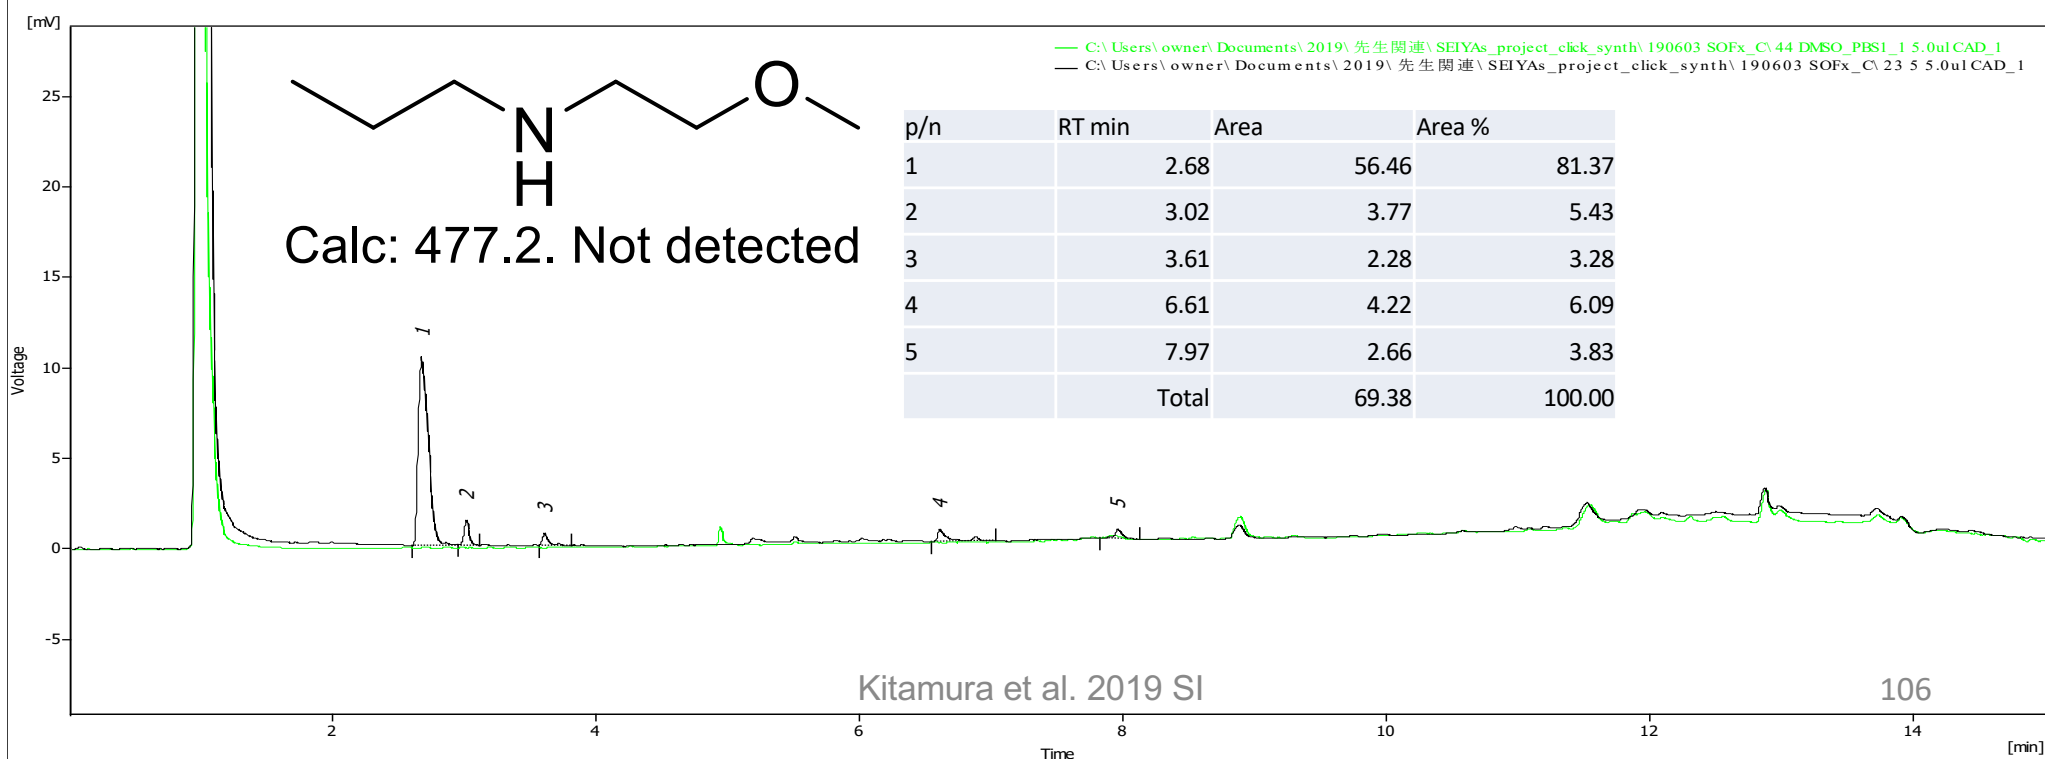

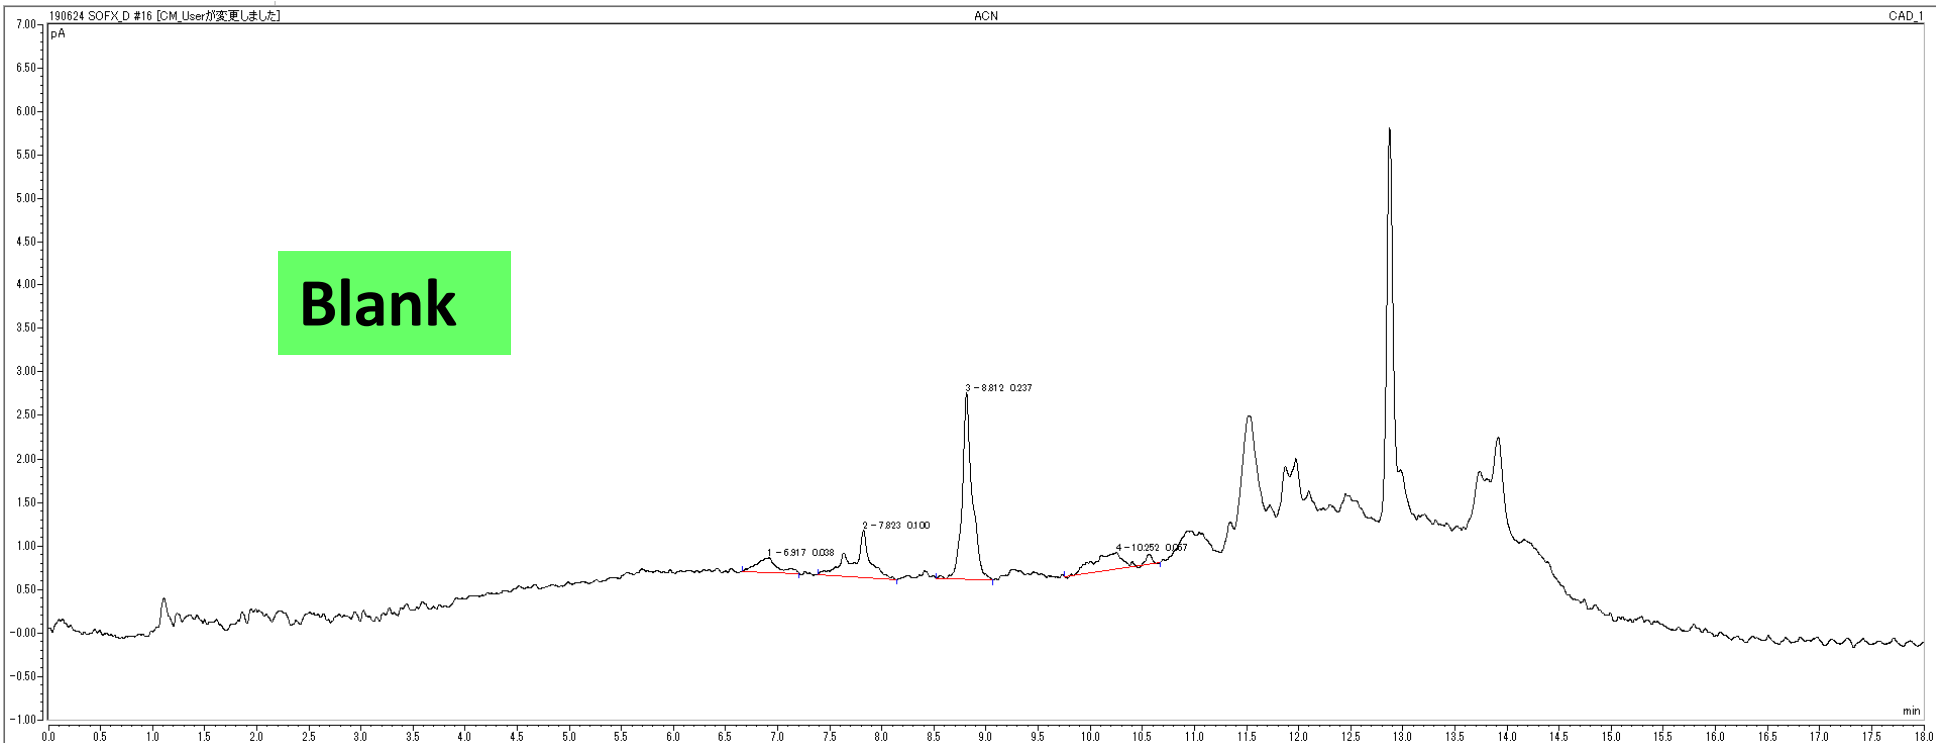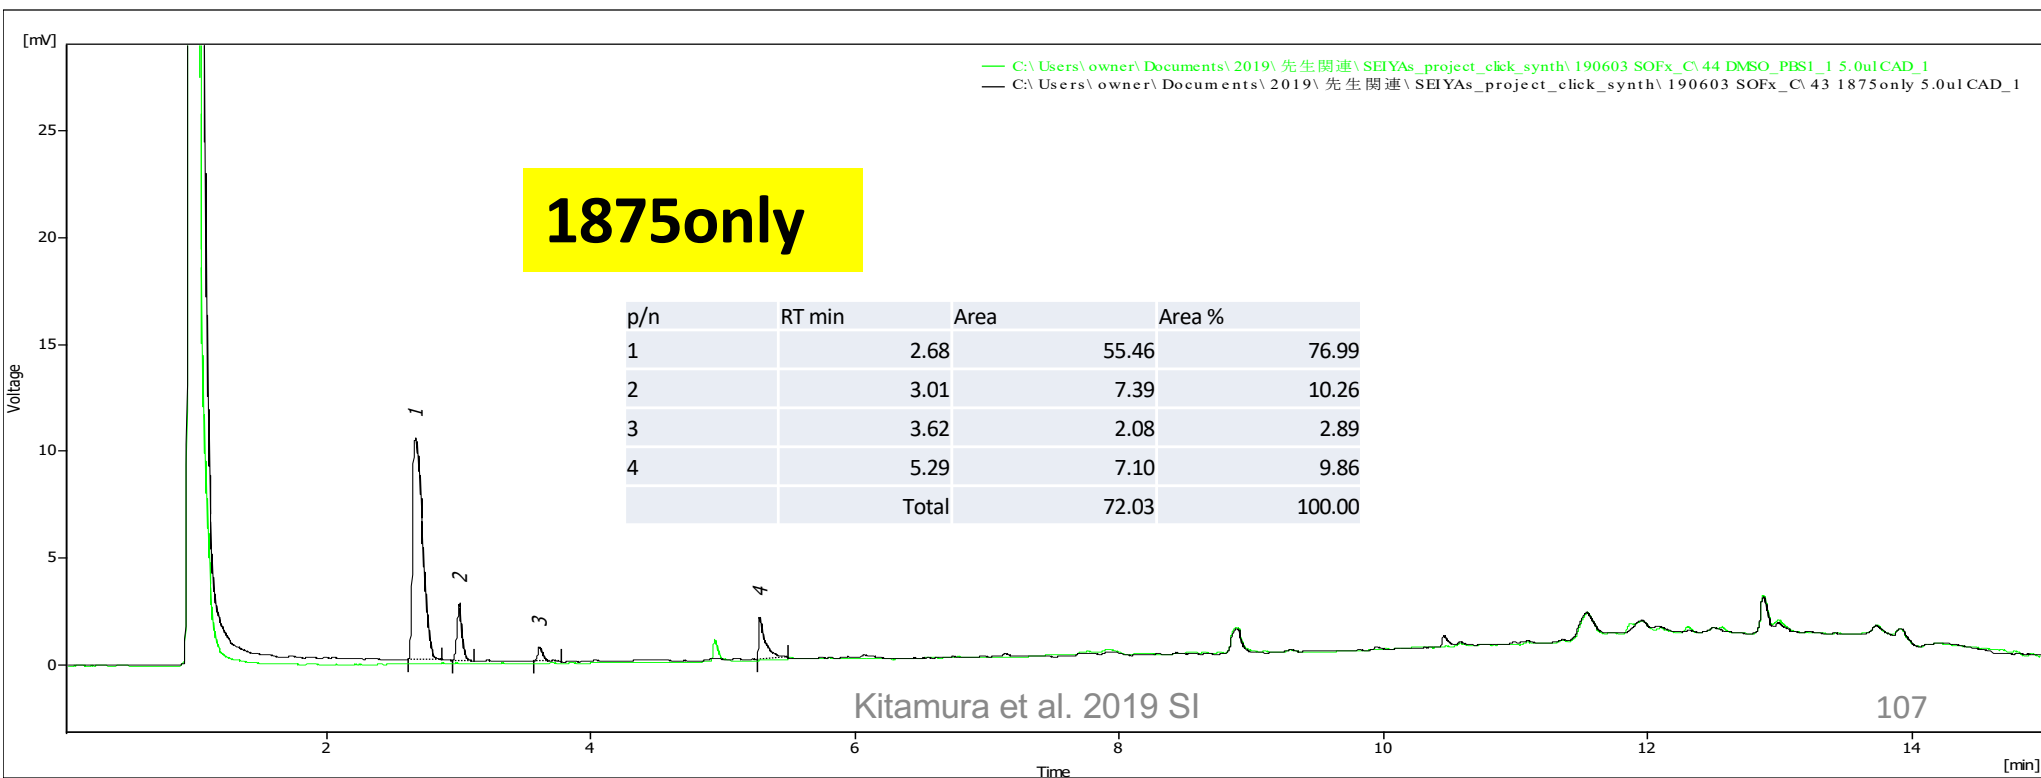

## Calibration curves of representative molecules

log-log plot

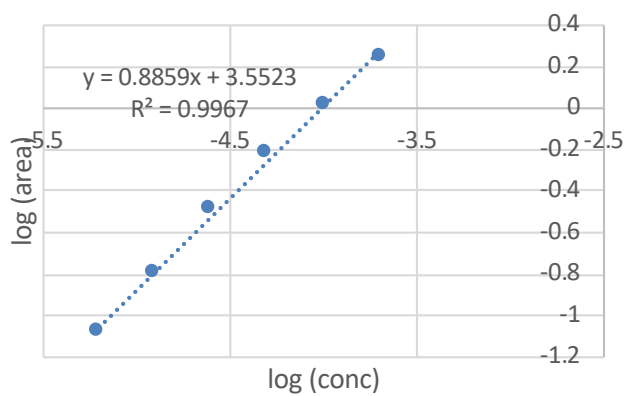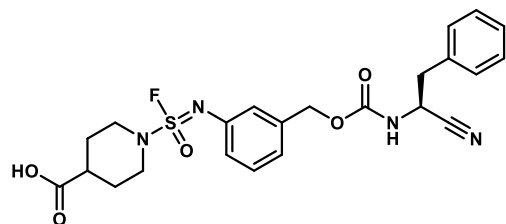

log-log plot

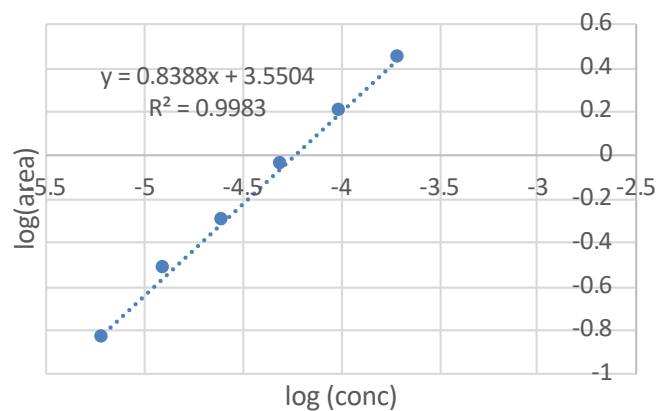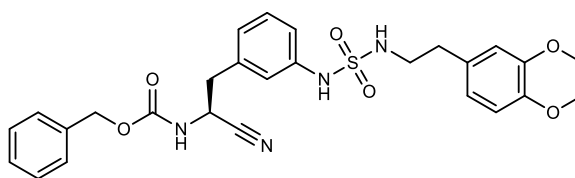

log-log plot

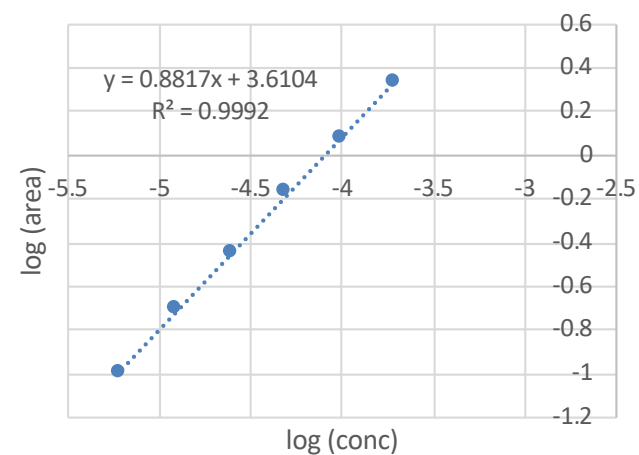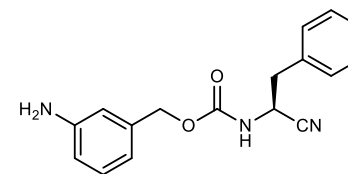

Supplement: NIHMS1652809-supplement-SI.pdf [file NIHMS1652809-supplement-SI.pdf]
